# Supplementary material for: A model for N-to-C direction in prebiotic peptide synthesis
Source: Royal Society of Chemistry journal article supplement (doi:10.1039/d3cc06101a), 2024-01-01
Supplement: d3cc06101a1.pdf [file d3cc06101a1.pdf]

## Supporting Information

### A model for *N*-to-*C* direction in prebiotic peptide synthesis

Li Zhang, <sup>a</sup> Min Zhang, <sup>a</sup> Xiaofan Guo, <sup>a</sup> Dingwei Gan, <sup>b</sup> Yong Ye, <sup>d</sup> Yufen Zhao, <sup>ac</sup> and Jianxi Ying\*<sup>a</sup>

<sup>a</sup> L. Zhang, M. Zhang, X.F. Guo, Prof. Y.F. Zhao, Prof. J.X. Ying  
Institute of Drug Discovery Technology

Ningbo University

No.818 Fenghua Road, Ningbo, Zhejiang, China 315211

E-mail: yingjianxi@nbu.edu.cn

<sup>b</sup> Dr.D.W. Gan

School of Electrical Engineering,

Xi'an Jiaotong University

No.28 Xianning West Road, Xi'an, Shaanxi 710049, P.R. China

E-Mail: Dingwei.Gan@stu.xjtu.edu.cn

<sup>c</sup> Prof. Y.F. Zhao

College of Chemistry and Chemical Engineering

Xiamen University

No. 422, Siming South Road, Xiamen, Fujian, China

<sup>d</sup> Prof. Y.Ye

College of Chemistry

Zhengzhou University

Zhengzhou 450001, China

\* Corresponding authors: [yingjianxi@nbu.edu.cn](mailto:yingjianxi@nbu.edu.cn) (Jianxi Ying)

## Content

|                                                                                                                                                                               |    |
|-------------------------------------------------------------------------------------------------------------------------------------------------------------------------------|----|
| 1. Materials and Methods.....                                                                                                                                                 | 5  |
| 1.1 Materials .....                                                                                                                                                           | 5  |
| 1.2 Polymerization process .....                                                                                                                                              | 5  |
| 1.3 Calculation of conversion efficiency of Ac-AA-NH <sub>2</sub> .....                                                                                                       | 6  |
| 1.4 Analysis Methods (HPLC-MS).....                                                                                                                                           | 6  |
| 2. Supplementary Figures .....                                                                                                                                                | 8  |
| 2.1 The Fourier transform infrared spectroscopy (FTIR).....                                                                                                                   | 8  |
| 2.2 The polymerization of 0.1 M Ac-Ala-NH <sub>2</sub> and 0.1 M Gly-NH <sub>2</sub> resulted in the formation of the highest pentapeptide N-Ac-Ala-Gly <sub>4</sub> -OH..... | 9  |
| 2.3 Oligomer produced by the polymerization of 0.1 M Ac-Ala-NH <sub>2</sub> and 0.1 M Gly-NH <sub>2</sub> . (Figs. S3-S15) .....                                              | 10 |
| 2.4 Oligomer produced by the polymerization of 0.1 M Ac-Ala-NH <sub>2</sub> and 0.1 M Glu-NH <sub>2</sub> . (Figs. S16-S20) .....                                             | 23 |
| 2.5 Oligomer produced by the polymerization of 0.1 M Ac-Ala-NH <sub>2</sub> and 0.1 M Ser-NH <sub>2</sub> . (Figs. S21-S26) .....                                             | 28 |
| 2.6 Oligomer produced by the polymerization of 0.1 M Ac-Ala-NH <sub>2</sub> and 0.1 M Val-NH <sub>2</sub> . (Figs. S27-S30) .....                                             | 34 |
| 2.7 Oligomer produced by the polymerization of 0.1 M Ac-Ala-NH <sub>2</sub> and 0.1 M Arg-NH <sub>2</sub> . (Figs. S31-S32) .....                                             | 38 |
| 2.8 Oligomer produced by the polymerization of 0.1M Ac-Ala-NH <sub>2</sub> and 0.1M Lys-NH <sub>2</sub> . (Figs. S33-S36) .....                                               | 40 |
| 2.9 Oligomer produced by the polymerization of 0.1 M Ac-Ala-NH <sub>2</sub> and 0.1 M Leu-NH <sub>2</sub> . (Figs. S37-S39) .....                                             | 44 |
| 2.10 Oligomer produced by the polymerization of 0.1 M Ac-Ala-NH <sub>2</sub> and 0.1 M Pro-NH <sub>2</sub> . (Figs. S40-S43) .....                                            | 47 |
| 2.11 Oligomer produced by the polymerization of 0.1 M Ac-Ala-NH <sub>2</sub> and 0.1 M Phe-NH <sub>2</sub> . (Figs. S44-S48) .....                                            | 51 |
| 2.12 Oligomer produced by the polymerization of 0.1 M Ac-Ala-NH <sub>2</sub> and 0.1 M Ile-NH <sub>2</sub> . (Figs. S49-S51) .....                                            | 56 |

|                                                                                                                                                  |     |
|--------------------------------------------------------------------------------------------------------------------------------------------------|-----|
| 2.13 Oligomer produced by the polymerization of 0.1 M Ac-Ala-NH <sub>2</sub> and 0.1 M Met-NH <sub>2</sub> . (Figs. S52-S58) .....               | 59  |
| 2.14 Oligomer produced by the polymerization of 0.1 M Ac-Ala-NH <sub>2</sub> and 0.1 M Thr-NH <sub>2</sub> . (Figs. S59-S63) .....               | 66  |
| 2.15 Oligomer produced by the polymerization of 0.1 M Ac-Ala-NH <sub>2</sub> and 0.1 M Thr-NH <sub>2</sub> . (Figs. S64-S68) .....               | 71  |
| 2.16 Oligomer produced by the polymerization of 0.1 M Ac-Ala-NH <sub>2</sub> and 0.1 M Thr-NH <sub>2</sub> . (Figs. S69-S72) .....               | 76  |
| 2.17 Oligomer produced by the polymerization of 0.1 M Ac-Ala-NH <sub>2</sub> and 0.1 M Asp-NH <sub>2</sub> . (Figs. S73-S78) .....               | 80  |
| 2.18 Oligomer produced by the polymerization of 0.1M Ac-Ala-NH <sub>2</sub> and 0.1M Tyr-NH <sub>2</sub> . (Figs. S79-S81) .....                 | 86  |
| 2.19 Secondary mass spectrometry analysis of trimers from the reaction of Ac-Ala-NH <sub>2</sub> with AA-NH <sub>2</sub> . (Figs. S82-S94) ..... | 89  |
| 2.20 Table S1 Peptide synthesis of N-acetyl-Gly-NH <sub>2</sub> with AA-NH <sub>2</sub> . .....                                                  | 102 |
| 2.21 Oligomer produced by the polymerization of 0.1 M Ac-Gly-NH <sub>2</sub> and 0.1 M Ala-NH <sub>2</sub> . (Figs. S95-S98) .....               | 103 |
| 2.22 Oligomer produced by the polymerization of 0.1 M Ac-Gly-NH <sub>2</sub> and 0.1 M Glu-NH <sub>2</sub> . (Figs. S99-S105) .....              | 107 |
| 2.23 Oligomer produced by the polymerization of 0.1 M Ac-Gly-NH <sub>2</sub> and 0.1 M Ser-NH <sub>2</sub> . (Figs. S106-S110) .....             | 114 |
| 2.24 Oligomer produced by the polymerization of 0.1 M Ac-Gly-NH <sub>2</sub> and 0.1 M Val-NH <sub>2</sub> . (Figs. S111-S116) .....             | 119 |
| 2.25 Oligomer produced by the polymerization of 0.1 M Ac-Gly-NH <sub>2</sub> and 0.1 M Arg-NH <sub>2</sub> . (Figs. S117-S119) .....             | 125 |
| 2.26 Oligomer produced by the polymerization of 0.1 M Ac-Gly-NH <sub>2</sub> and 0.1 M Lys-NH <sub>2</sub> . (Figs. S120-S122) .....             | 128 |
| 2.27 Oligomer produced by the polymerization of 0.1 M Ac-Gly-NH <sub>2</sub> and 0.1 M Leu-NH <sub>2</sub> . (Figs. S123-S127) .....             | 131 |
| 2.28 Oligomer produced by the polymerization of 0.1 M Ac-Gly-NH <sub>2</sub> and 0.1 M Phe-NH <sub>2</sub> . (Figs. S128-S133) .....             | 136 |
| 2.29 Oligomer produced by the polymerization of 0.1 M Ac-Gly-NH <sub>2</sub> and 0.1 M Pro-NH <sub>2</sub> . (Figs. S134-S138) .....             | 142 |

|                                                                                                                                                                |     |
|----------------------------------------------------------------------------------------------------------------------------------------------------------------|-----|
| 2.30 Oligomer produced by the polymerization of 0.1 M Ac-Gly-NH <sub>2</sub> and 0.1 M Ile-NH <sub>2</sub> . (Figs. S139-S142) .....                           | 147 |
| 2.31 Oligomer produced by the polymerization of 0.1 M Ac-Gly-NH <sub>2</sub> and 0.1 M Met-NH <sub>2</sub> . (Figs. S143-S150) .....                           | 151 |
| 2.32 Oligomer produced by the polymerization of 0.1 M Ac-Gly-NH <sub>2</sub> and 0.1 M Thr-NH <sub>2</sub> . (Figs. S151-S154) .....                           | 159 |
| 2.33 Oligomer produced by the polymerization of 0.1 M Ac-Gly-NH <sub>2</sub> and 0.1 M Trp-NH <sub>2</sub> . (Figs. S155-S158) .....                           | 163 |
| 2.34 Oligomer produced by the polymerization of 0.1 M Ac-Gly-NH <sub>2</sub> and 0.1 M His-NH <sub>2</sub> . (Figs. S159-S164) .....                           | 167 |
| 2.35 Oligomer produced by the polymerization of 0.1 M Ac-Gly-NH <sub>2</sub> and 0.1 M Asp-NH <sub>2</sub> . (Figs. S165-S172) .....                           | 173 |
| 2.36 Oligomer produced by the polymerization of 0.1 M Ac-Gly-NH <sub>2</sub> and 0.1 M Tyr-NH <sub>2</sub> . (Figs. S173-S177) .....                           | 181 |
| 2.37 Secondary mass spectrometry analysis of the product trimers from the reaction of Ac-Gly-NH <sub>2</sub> with AA-NH <sub>2</sub> . (Figs. S178-S189) ..... | 186 |
| 2.38 Two-component reaction and one-pot reaction. (Fig. S190).....                                                                                             | 198 |
| 2.39 Conversion efficiency of Ac-Ala-NH <sub>2</sub> . (Fig. S191).....                                                                                        | 199 |
| 2.40 The reaction of Ac-Ala-NH <sub>2</sub> and Gly-NH <sub>2</sub> . (Fig. S192).....                                                                         | 200 |
| 2.41 Mechanism. (Fig. S193).....                                                                                                                               | 201 |

# 1. Materials and Methods

## 1.1 Materials

Glu-NH<sub>2</sub>, Ser-NH<sub>2</sub>, Met-NH<sub>2</sub>, Asp-NH<sub>2</sub>, Tyr-NH<sub>2</sub> were obtained from Shanghai Macklin Biochemical Co., Ltd. (China). Ala-NH<sub>2</sub>, Val-NH<sub>2</sub>, Leu-NH<sub>2</sub>, Pro-NH<sub>2</sub>, Phe-NH<sub>2</sub> were purchased from Energy Chemical (China). Ac-Ala-NH<sub>2</sub> was purchased from Shanghai yuanye Bio-Technology Co., Ltd (China). Ac-Gly-NH<sub>2</sub> was purchased from Meryer (Shanghai) Chemical Technology Co., Ltd. (China). Arg-NH<sub>2</sub>, His-NH<sub>2</sub> were obtained from Leyan (China). Lys-NH<sub>2</sub>, Thr-NH<sub>2</sub>, Trp-NH<sub>2</sub> were obtained from BIDE PHARMATECH CO., LTD. (China). Ile-NH<sub>2</sub> was purchased from Shanghai Titan Scientific Co., Ltd. (China). Ultrapure water (18.2 MΩ cm) from a Milli-Q water purification system (Millipore, Bedford, MA) was used to prepare solutions and the mobile phase.

## 1.2 Polymerization process

**Two-component system reaction:** 0.1 M Ac-AA<sup>1</sup>-NH<sub>2</sub> and 0.1 M AA<sup>2</sup>-NH<sub>2</sub> were dissolved in 1mL deionized water, mixed evenly, and adjusted to neutral solution with 0.5 M NaOH. The reactants were placed in a centrifuge tube and reacted at 80 ° C for 24 hours. After complete drying, 0.1mL deionized water was added to fully dissolve the reactants, and continued drying at 80°C for 24 hours.

**One-pot mixing system reaction:** 0.1 M Ac-AA<sup>1</sup>-NH<sub>2</sub> and 15 kinds of AA-NH<sub>2</sub> with a total concentration of 0.1 M were mixed in 1mL deionized water, and after mixing evenly, 0.5 M NaOH was used to adjust the solution to be neutral. The reactants were placed in a centrifuge tube and reacted at 80 ° C for 24 hours. After complete drying,

0.1 mL deionized water was added to fully dissolve the reactants, and continued drying at 80°C for 24 hours.

### 1.3 Calculation of conversion efficiency of Ac-AA-NH<sub>2</sub>.

The method for calculating conversion efficiency as follows: Conversion Efficiency (Ac-AA-NH<sub>2</sub>) = [The reduction amount of Ac-AA-NH<sub>2</sub> in the reaction group] / [Amount of Ac-AA-NH<sub>2</sub> in the raw material group]. We divided the reactions into a raw material group and a reaction group. The raw material group consisted of Ac-Ala-NH<sub>2</sub>, while the reaction group was split into two subgroups: Ac-Ala-NH<sub>2</sub>+Gly-NH<sub>2</sub> and Ac-Ala-NH<sub>2</sub>+His-NH<sub>2</sub>. All three groups received their Ac-Ala-NH<sub>2</sub> from the same parent solution. After undergoing two dry-wet cycles, the pH of all three groups (Ac-Ala-NH<sub>2</sub>, Ac-Ala-NH<sub>2</sub>+Gly-NH<sub>2</sub>, and Ac-Ala-NH<sub>2</sub>+His-NH<sub>2</sub>) was uniformly adjusted to 7. Upon completion of the reactions, the peak area of Ac-Ala-NH<sub>2</sub> was extracted in the mass spectrum.

### 1.4 Analysis Methods (HPLC-MS)

The MS was performed in positive mode on a Thermo Scientific TM Q Exactive Plus™ system. MS instrument parameters were set as follows: The capillary voltage was 3800 V, the atomizer pressure was 2 bar, the dry gas was 3 L•min<sup>-1</sup> and the dry temperature was 320 °C. Mass spectra were registered in the scan range from m/z = 50 to 500. For ESI-MS, approximately 1/10 of the LC eluent was introduced through a splitting T valve. For HPLC-MS online detection of reaction products, we set up the divert valve of the MS instrument as: This valve can be used to switch HPLC flows directly to the MS when the divert valve was located at the source. HPLC was performed on Thermo Scientific TM Q Exactive Plus™ system and fitted with a Luna-C18 column, 5 μm, 4.6 mm × 250 mm column. The column temperature was kept at room temperature. A binary mobile phase (solvent C: acetonitrile; solvent D: water with 0.1% formic acid) was used with the flow rate at 1 mL•min<sup>-1</sup>. The linear gradient elution program was as follows: 0~4 min, 5% C; 4~19 min, 5%–70% C; 19~21 min,

70% C; 21~22 min, 70% -5% C; 22~30 min, 5% C. The detection wavelength was 210 nm and the sample size was 3  $\mu$ L. For the on-line detection of reaction products by HPLC-MS, a shunt T-valve was used to cleverly switch the eluent of higher performance liquid chromatography to achieve on-line desalination detection. The specific setting is :0-1 min, the shunt valve will switch the HPLC eluent to the waste liquid; After 1 minute, the diverter valve switches the HPLC eluent to MS.

## 2. Supplementary Figures

### 2.1 The Fourier transform infrared spectroscopy (FTIR).

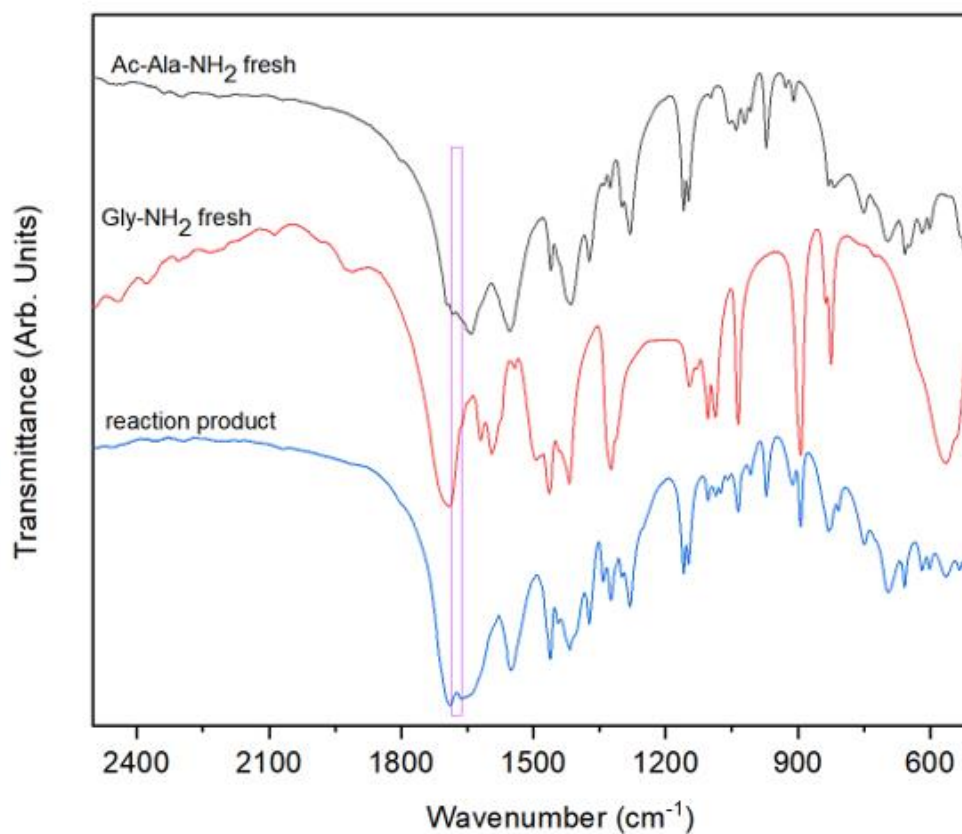

Fig. S1 The Fourier transform infrared spectroscopy (FTIR) reveals changes in the band at 1620–1700 cm<sup>-1</sup>, which are associated with amide I vibrations (mainly CO group stretching mode). Fresh represents raw materials that have not undergone chemical reactions.



2.2 The polymerization of 0.1 M Ac-Ala-NH<sub>2</sub> and 0.1 M Gly-NH<sub>2</sub> resulted in the formation of the highest pentapeptide N-Ac-Ala-Gly<sub>4</sub>-OH.

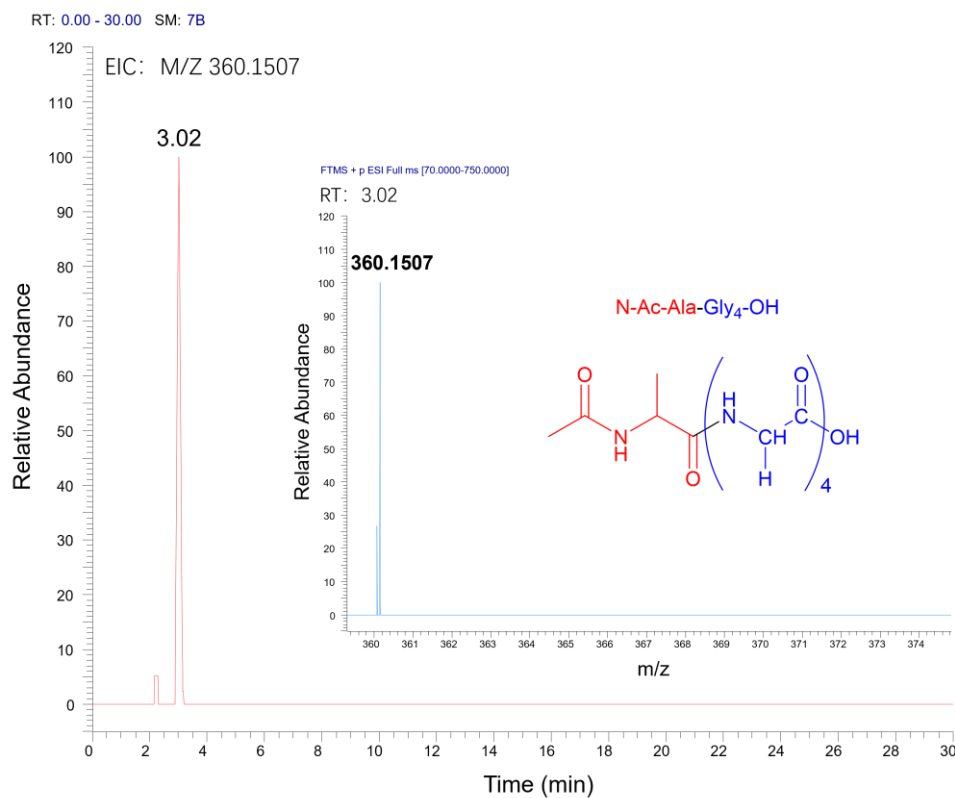

Fig. S2 The polymerization of 0.1 M Ac-Ala-NH<sub>2</sub> and 0.1 M Gly-NH<sub>2</sub> resulted in the formation of the highest pentapeptide N-Ac-Ala-Gly<sub>4</sub>-OH. The mass charge ratio of N-Ac-Ala-Gly<sub>4</sub>-OH tetrapeptide is m/z=360.1507, and the peak occurs at 3.02 min retention time.

2.3 Oligomer produced by the polymerization of 0.1 M Ac-Ala-NH<sub>2</sub> and 0.1 M Gly-NH<sub>2</sub>. (Figs. S3-S15)

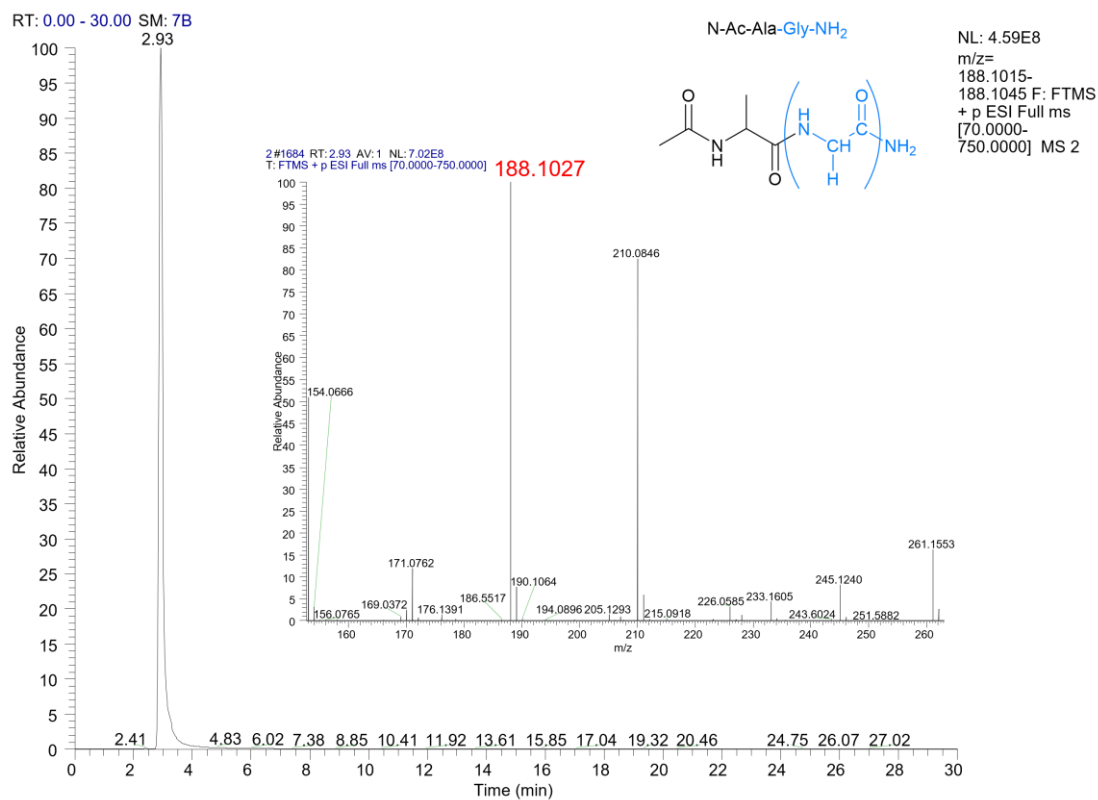

Fig. S3 Extraction ion chromatography-mass spectrometry of the product. The EIC of m/z 188.1027 was analyzed, and its EIC corresponded to the dimer N-Ac-Ala-Gly-NH<sub>2</sub> with a retention time of 2.93 min.

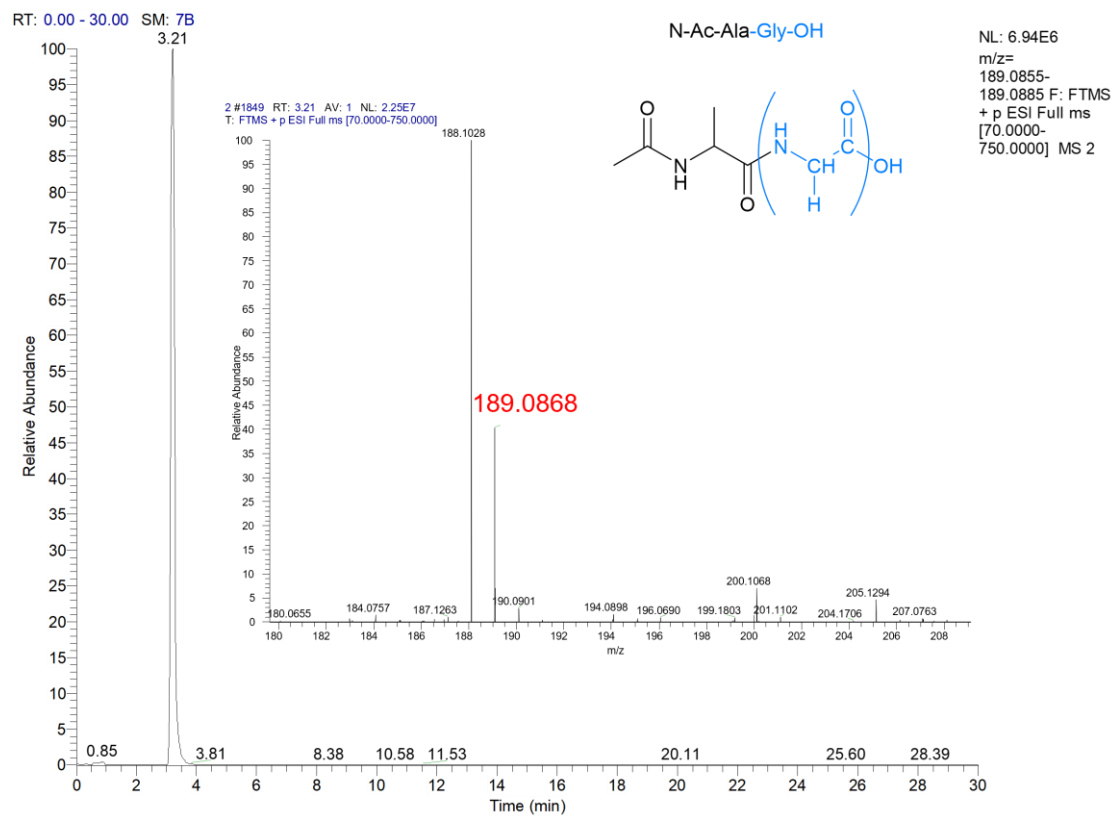

Fig. S4 Extraction ion chromatography-mass spectrometry analysis of the product. The EIC of m/z 189.0868 was analyzed and its EIC corresponded to the dipeptide N- Ac-Ala-Gly-OH with a retention time of 3.21 min.

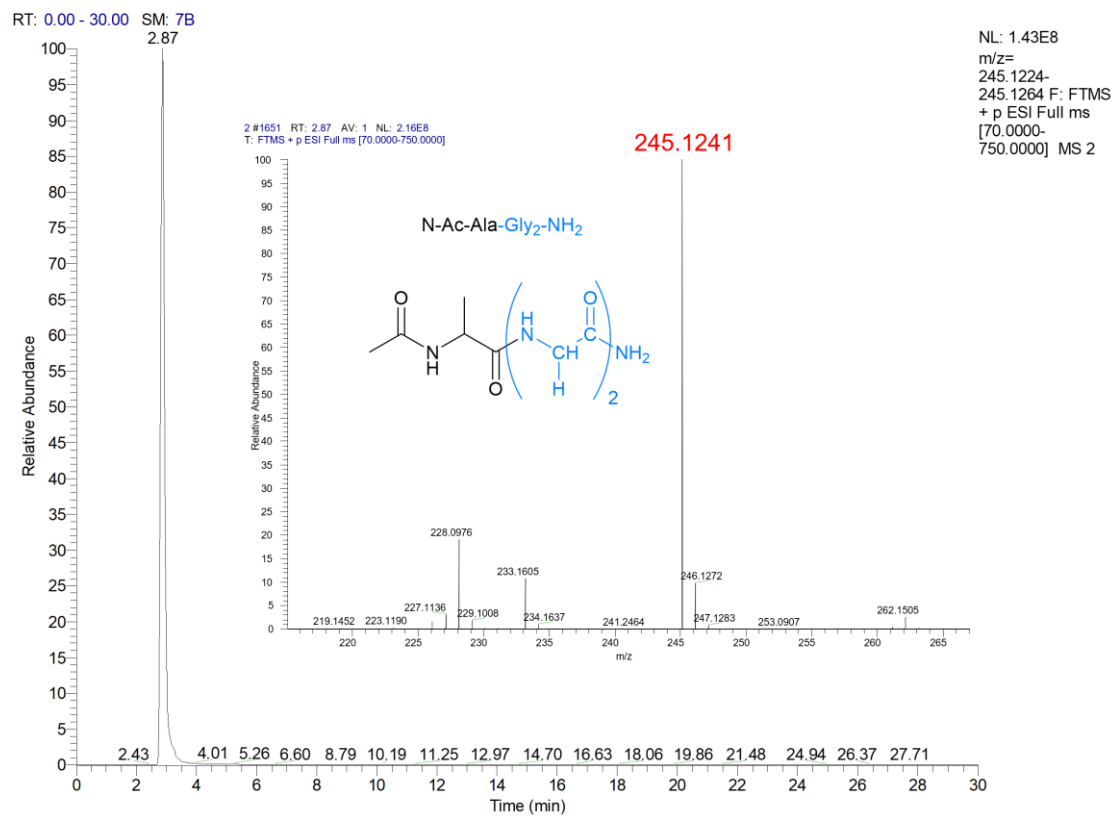

Fig. S5 Extraction ion chromatography-mass spectrometry analysis of the product. The EIC of  $m/z$  245.12418 was analyzed, and its EIC corresponds to the trimer N-Ac-Ala-Gly<sub>2</sub>-NH<sub>2</sub> with a retention time of 2.87 min.

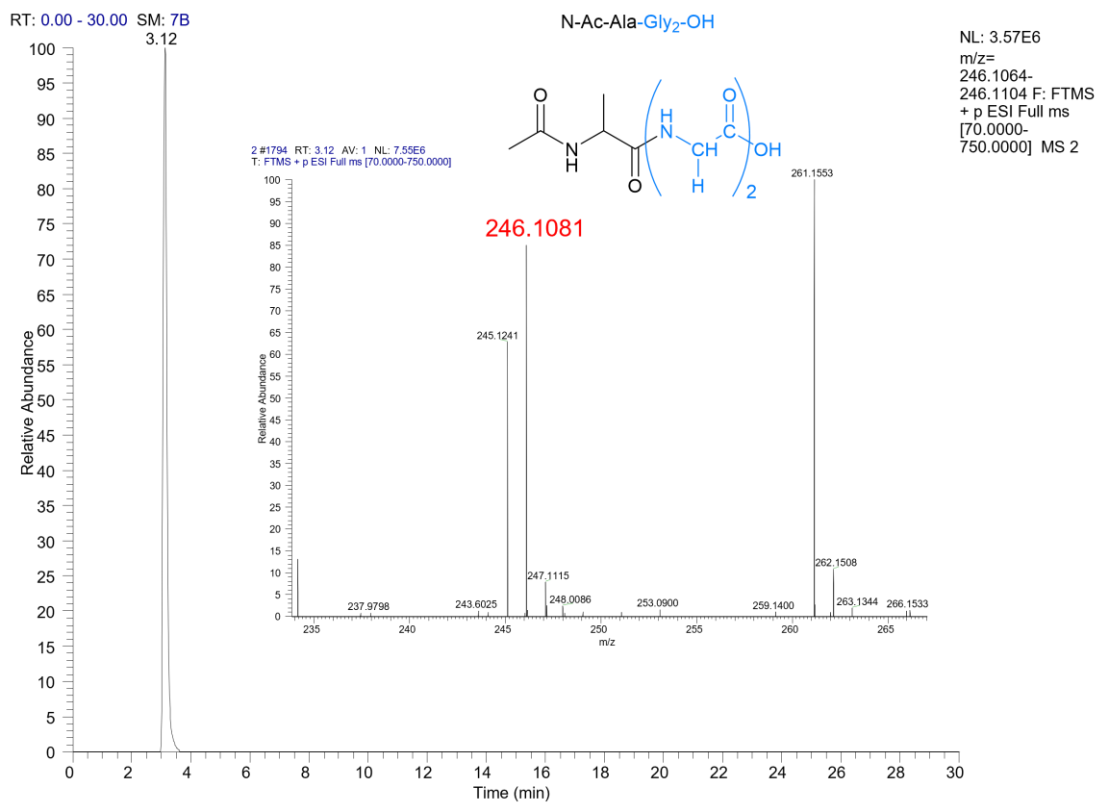

Fig. S6 Extraction ion chromatography-mass spectrometry analysis of the product. The EIC of  $m/z$  246.1081 was analyzed, and its EIC corresponded to the tripeptide N-Ac-Ala-Gly<sub>2</sub>-OH with a retention time of 3.12 min.

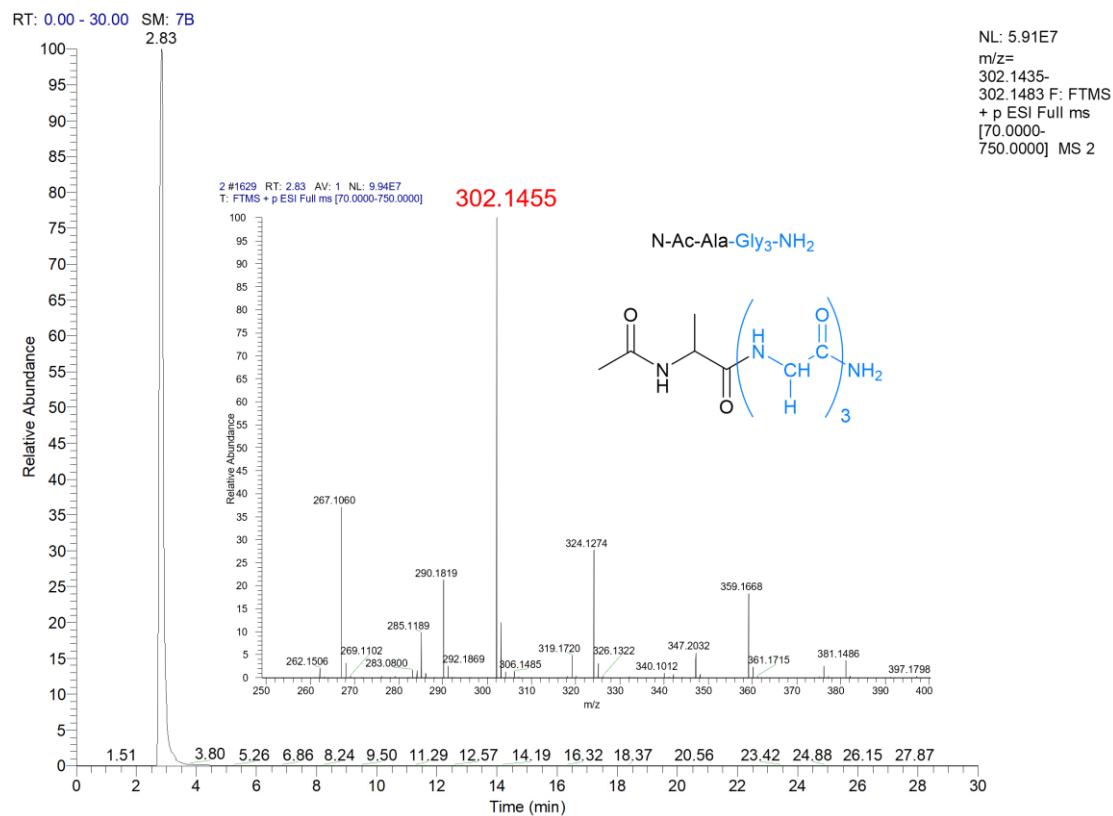

Fig. S7 Extraction ion chromatography-mass spectrometry analysis of the product. The EIC of m/z 302.1455 was analyzed and its EIC corresponded to the tetramer N-Ac-Ala-Gly<sub>3</sub>-NH<sub>2</sub> with a retention time of 2.83 min.

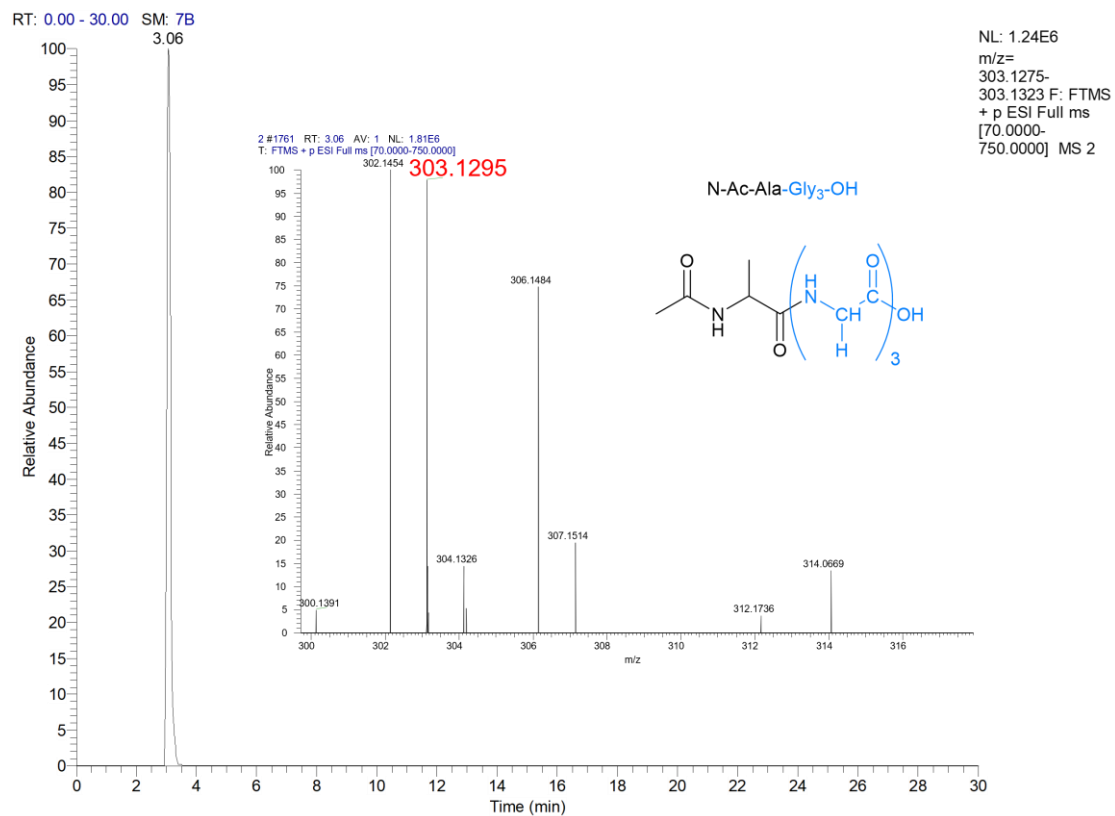

Fig. S8 Extraction ion chromatography-mass spectrometry analysis of the product. The EIC of m/z 303.1295 was analyzed and its EIC corresponded to the tetrapeptide N-Ac-Ala-Gly<sub>3</sub>-OH with a retention time of 3.06 min.

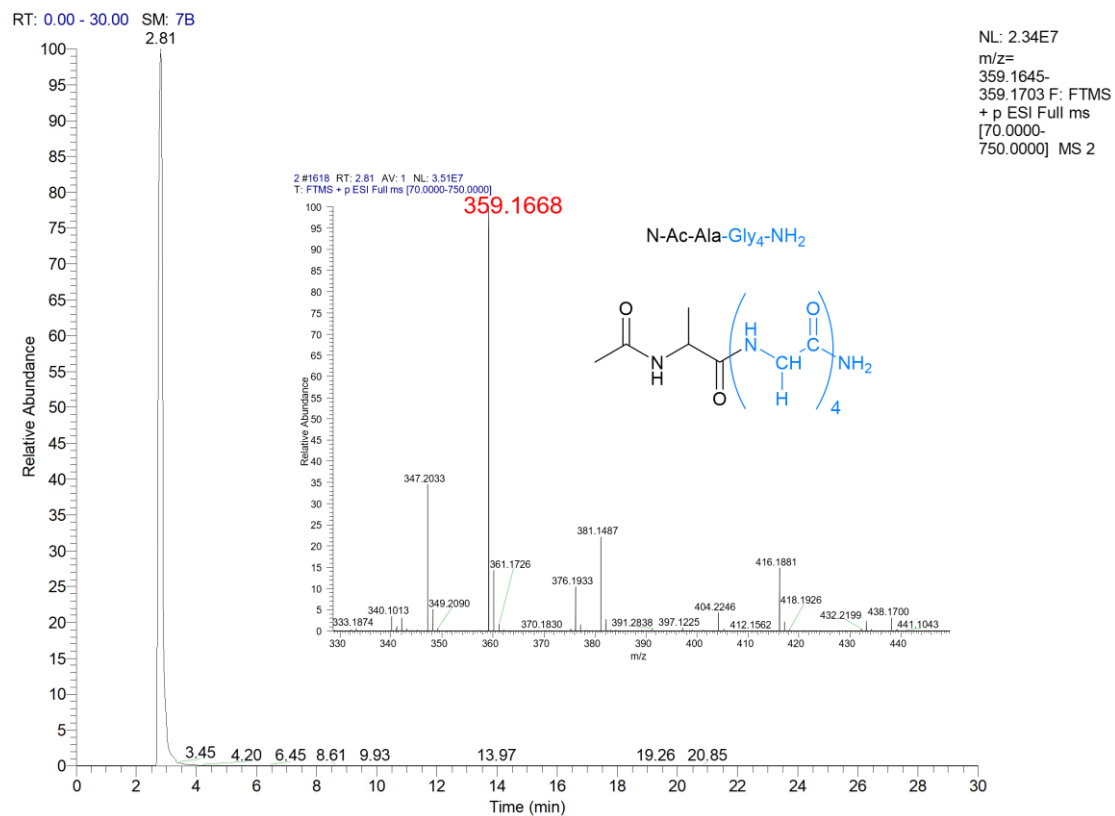

Fig. S9 Extraction ion chromatography-mass spectrometry analysis of the product. The EIC of m/z 359.1668 was analyzed, and its EIC corresponded to the pentamer N-Ac-Ala-Gly<sub>4</sub>-NH<sub>2</sub> with a retention time of 2.81 min.



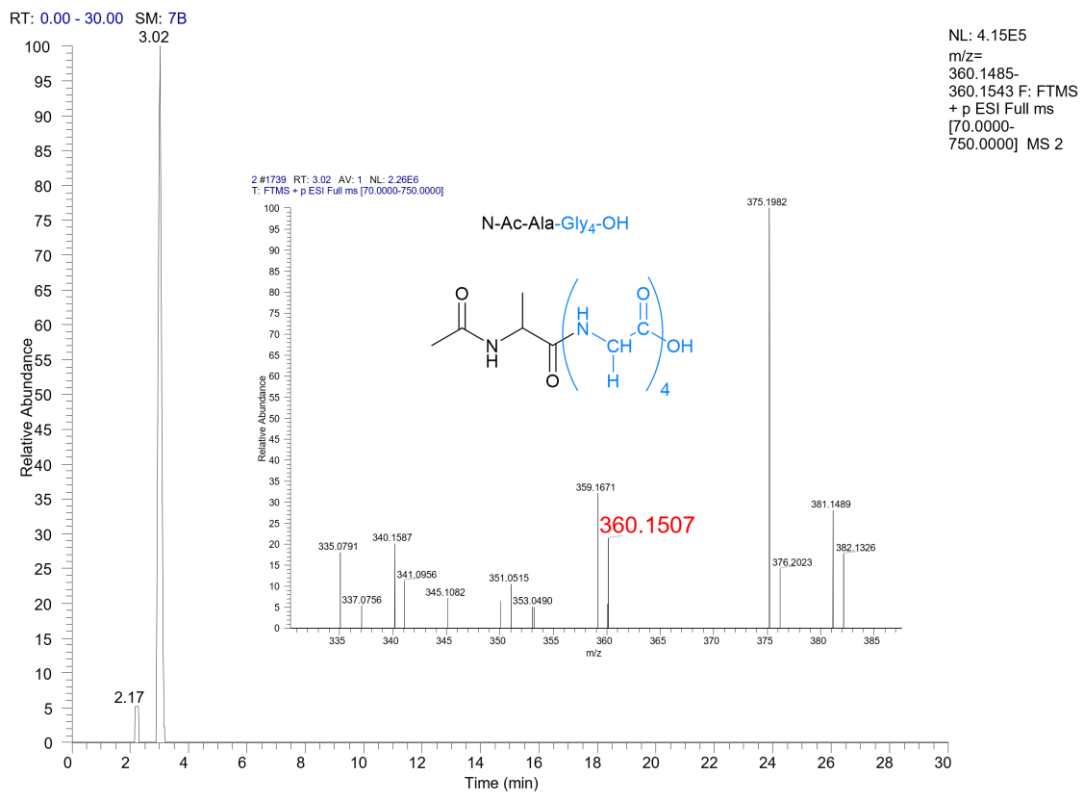

Fig. S10 Extraction ion chromatography-mass spectrometry analysis of the product. The EIC of m/z 360.1507 was analyzed and its EIC corresponded to pentapeptide N-Ac-Ala-Gly<sub>4</sub>-OH with a retention time of 3.02 min.

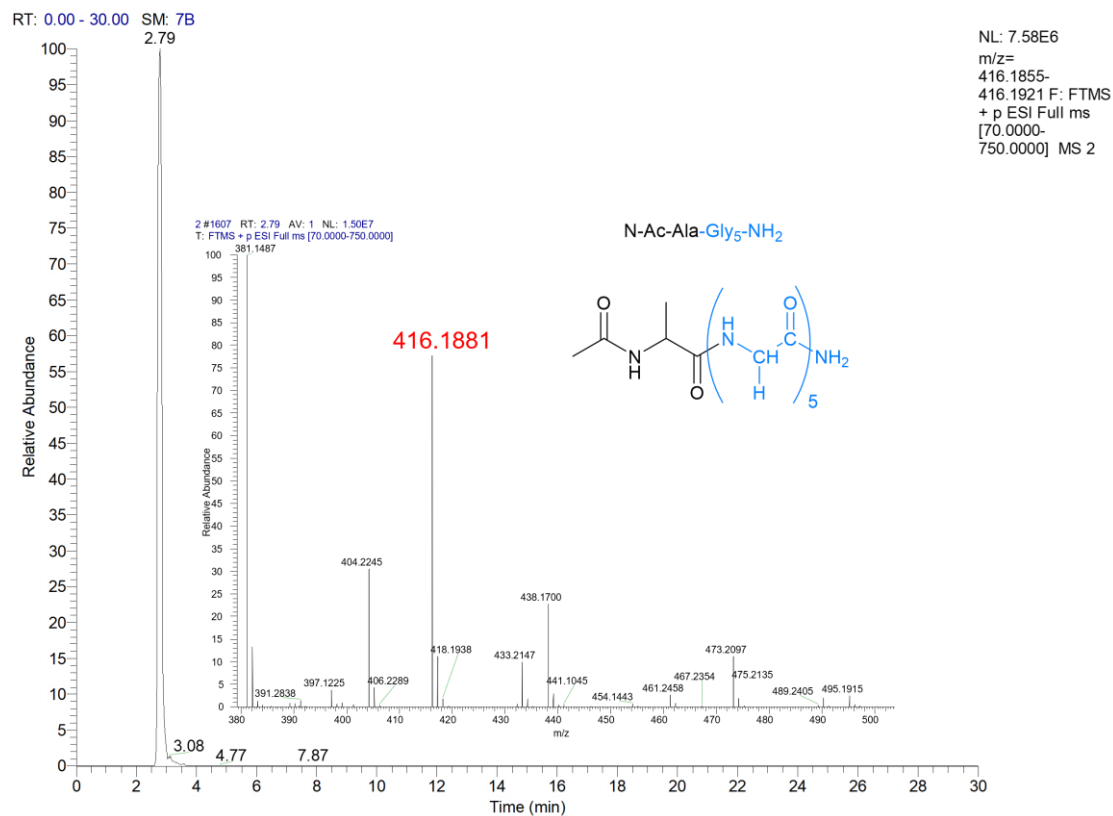

Fig. S11 Extraction ion chromatography-mass spectrometry analysis of the product. The EIC of m/z 416.1881 was analyzed and its EIC corresponded to the hexamer N-Ac-Ala-Gly<sub>5</sub>-NH<sub>2</sub> with a retention time of 2.79 min.

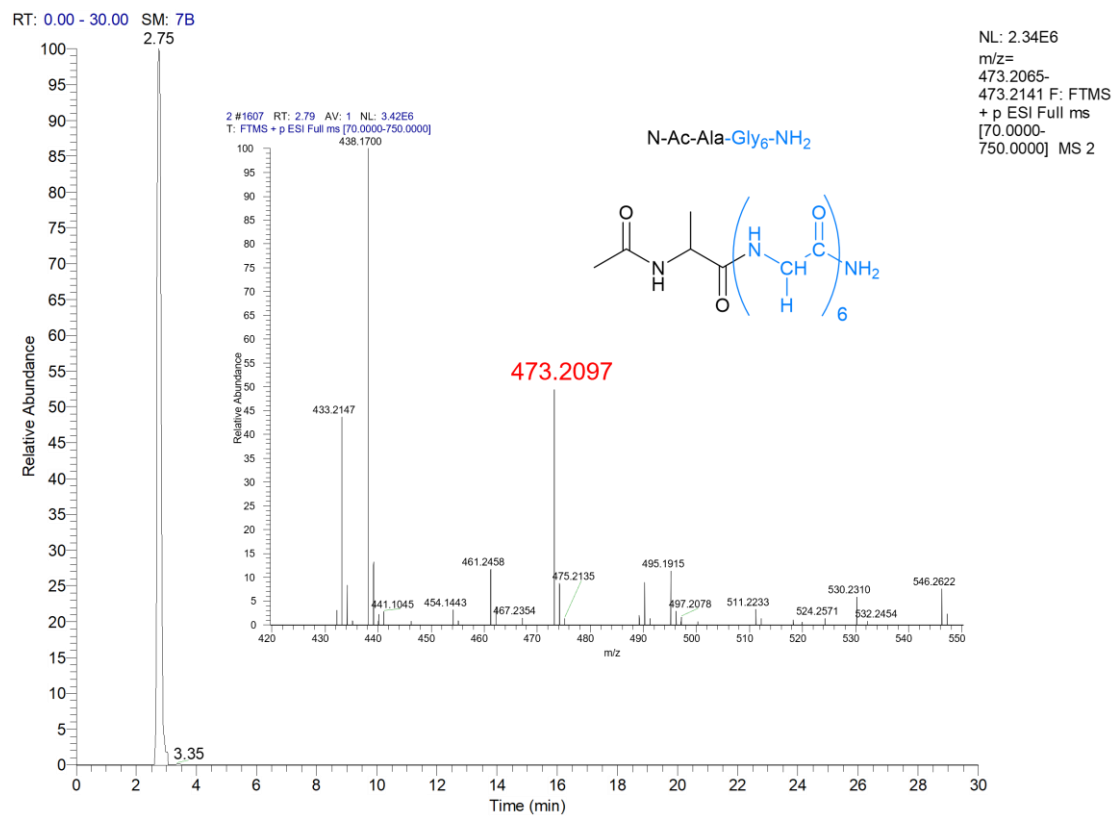

Fig. S12 Extraction ion chromatography-mass spectrometry analysis of the product. The EIC of  $m/z$  473.2097 was analyzed and its EIC corresponded to the heptamer N-Ac-Ala-Gly<sub>6</sub>-NH<sub>2</sub> with a retention time of 2.75 min.

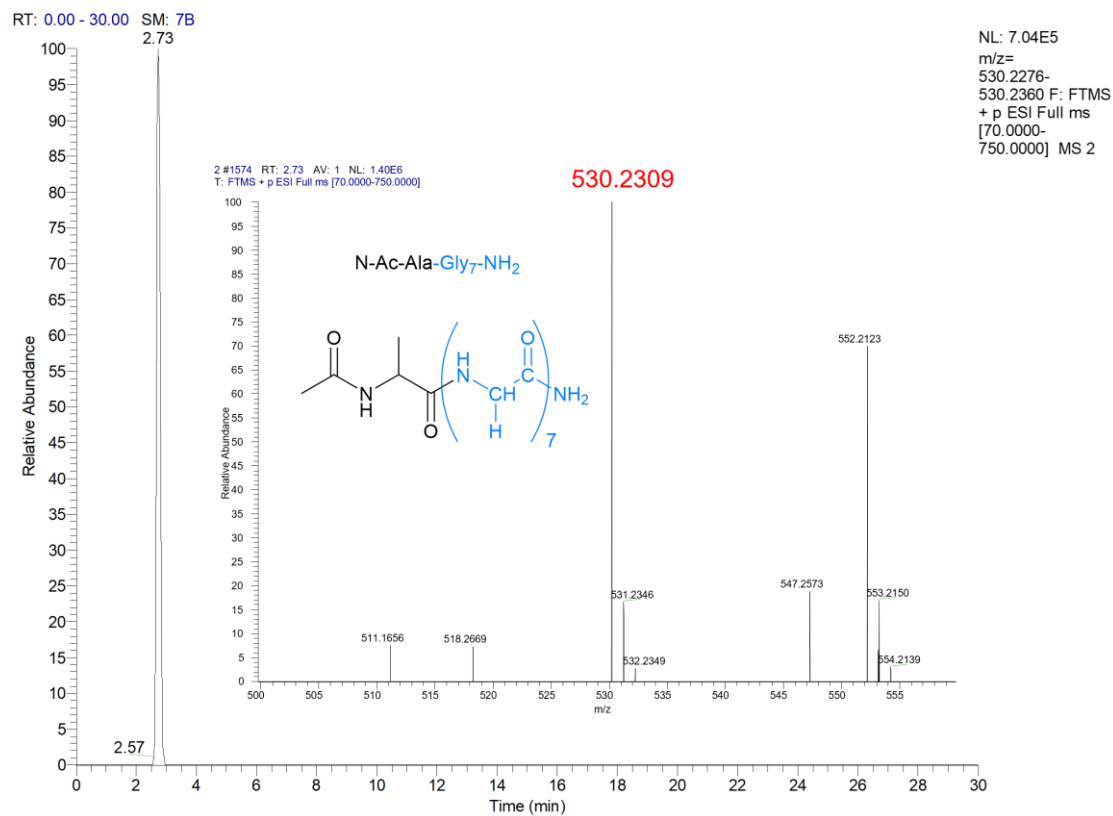

Fig. S13 Extraction ion chromatography-mass spectrometry analysis of the product. The EIC of m/z 530.2309 was analyzed and its EIC corresponded to the octamer N-Ac-Ala-Gly<sub>7</sub>-NH<sub>2</sub> with a retention time of 2.73 min.

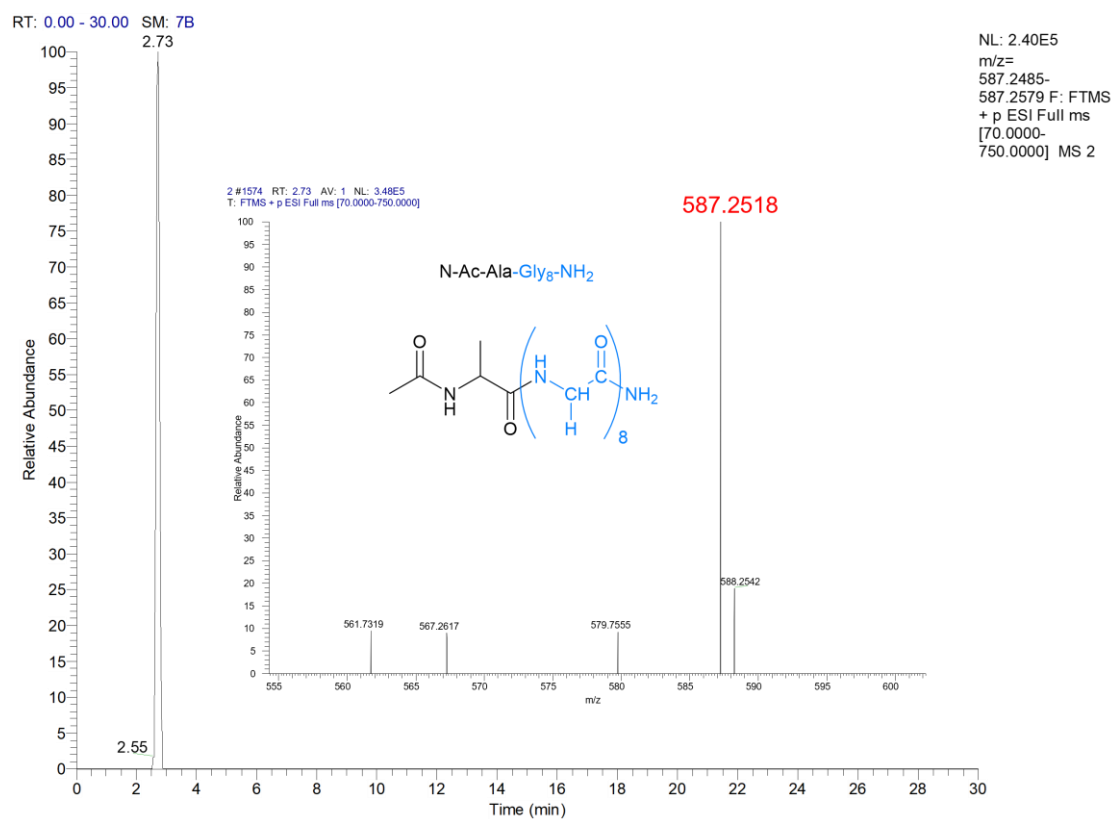

Fig. S14 Extraction ion chromatography-mass spectrometry analysis of the product. The EIC of m/z 587.2518 was analyzed, and its EIC corresponds to the unimer N-Ac-Ala-Gly<sub>8</sub>-NH<sub>2</sub> with a retention time of 2.73 min.

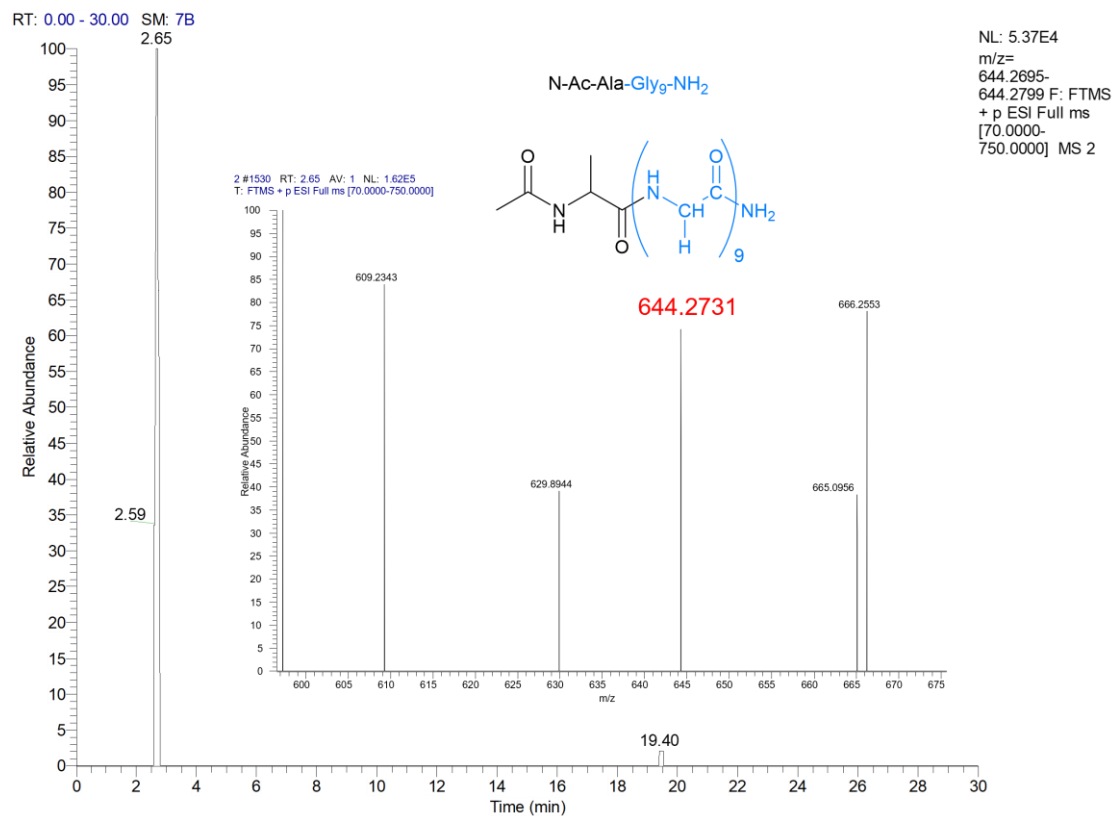

Fig. S15 Extraction ion chromatography-mass spectrometry analysis of the product. The EIC of m/z 644.2731 was analyzed and its EIC corresponded to the decamer N-Ac-Ala-Gly<sub>9</sub>-NH<sub>2</sub> with a retention time of 2.65 min.

2.4 Oligomer produced by the polymerization of 0.1 M Ac-Ala-NH<sub>2</sub> and 0.1 M Glu-NH<sub>2</sub>. (Figs. S16-S20)

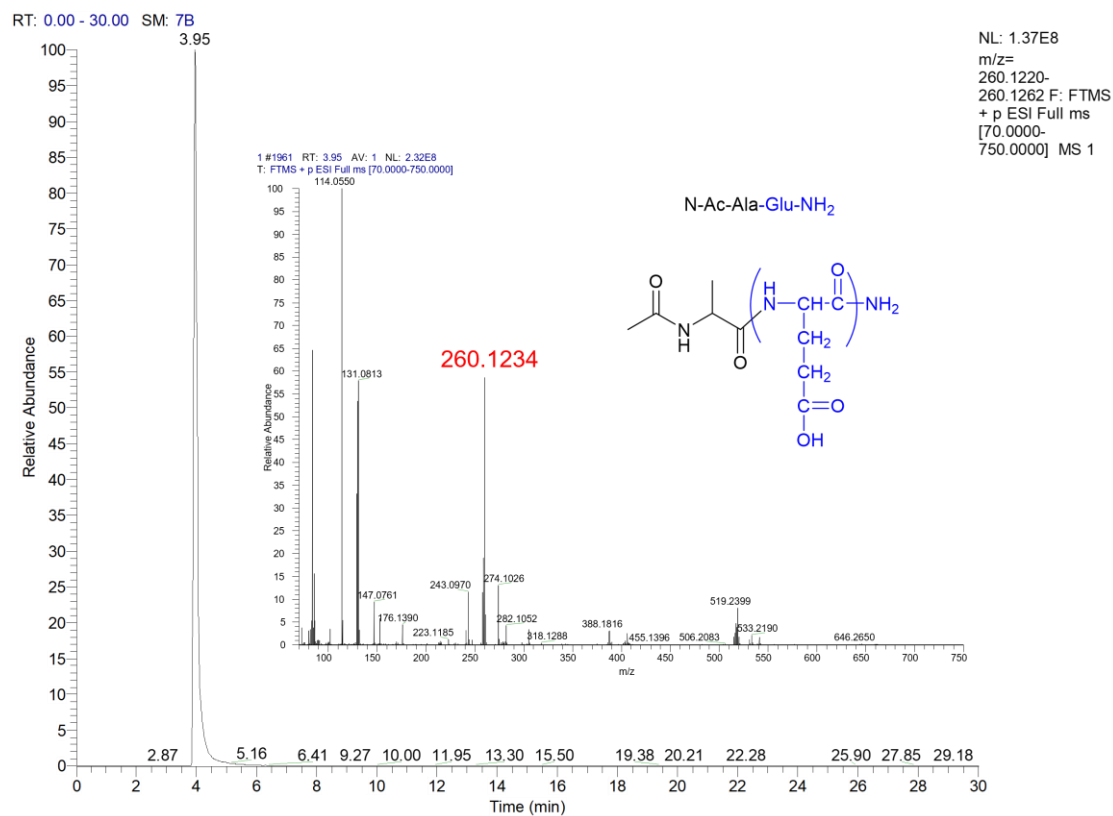

Fig. S16 Extraction ion chromatography-mass spectrometry analysis of the product. The EIC of m/z 260.1234 was analyzed and its EIC corresponded to the dimer N-Ac-Ala-Glu-NH<sub>2</sub> with a retention time of 3.95 min.

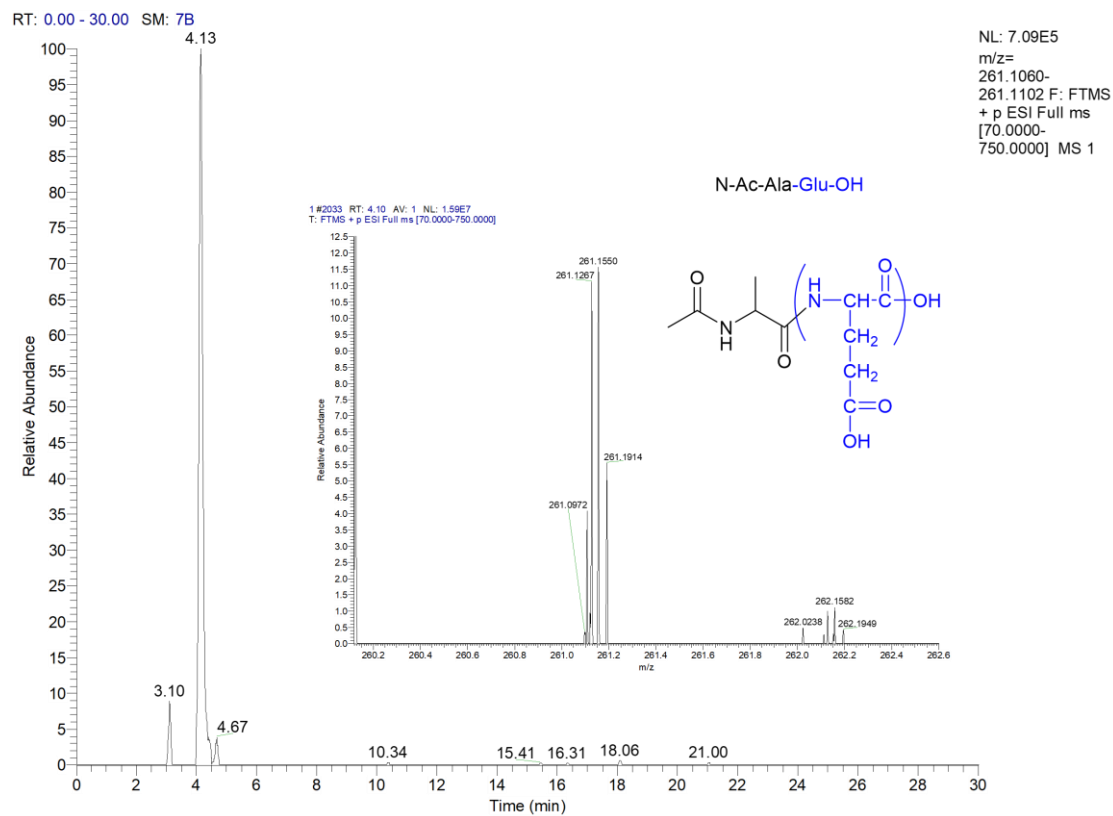

Fig. S17 Extraction ion chromatography-mass spectrometry analysis of the product. The EIC of m/z 261.1550 was analyzed, and its EIC corresponded to the dipeptide N-Ac-Ala-Glu-OH with a retention time of 4.13 min.



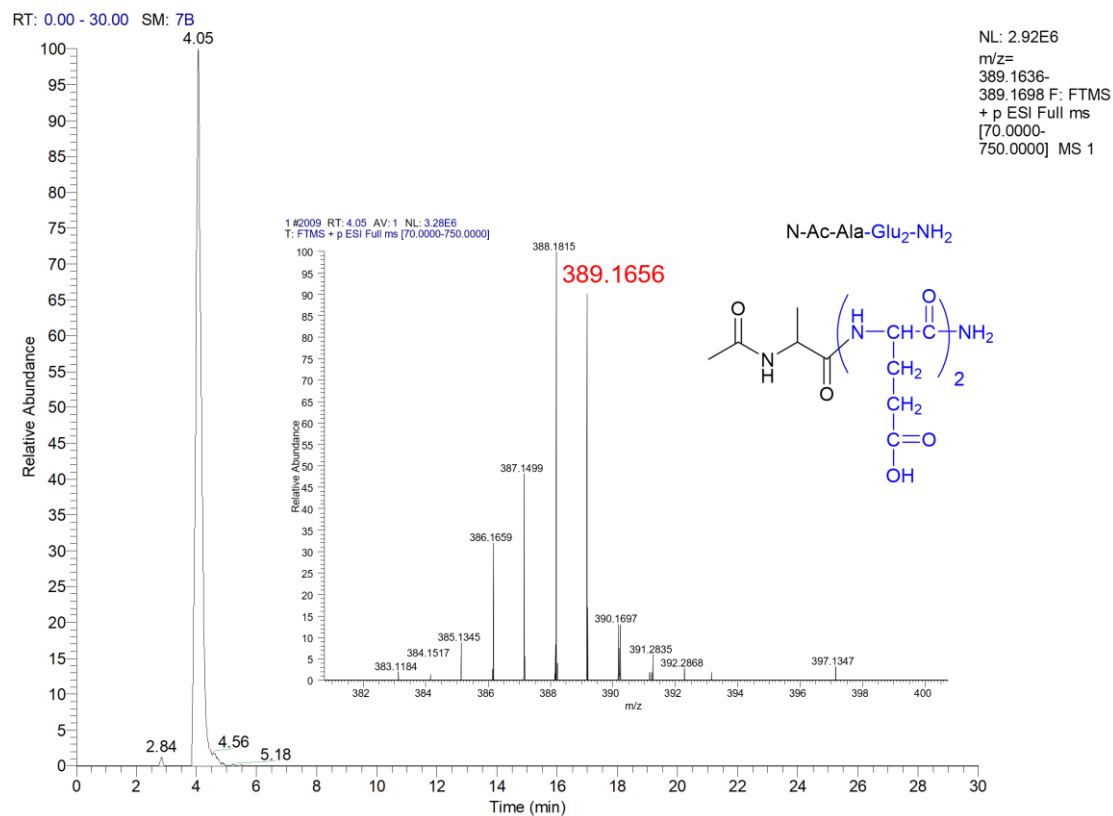

Fig. S18 Extraction ion chromatography-mass spectrometry analysis of the product. The EIC of  $m/z$  389.1656 was analyzed, and its EIC corresponds to the trimer N-Ac-Ala-Glu<sub>2</sub>-NH<sub>2</sub> with a retention time of 4.05 min.

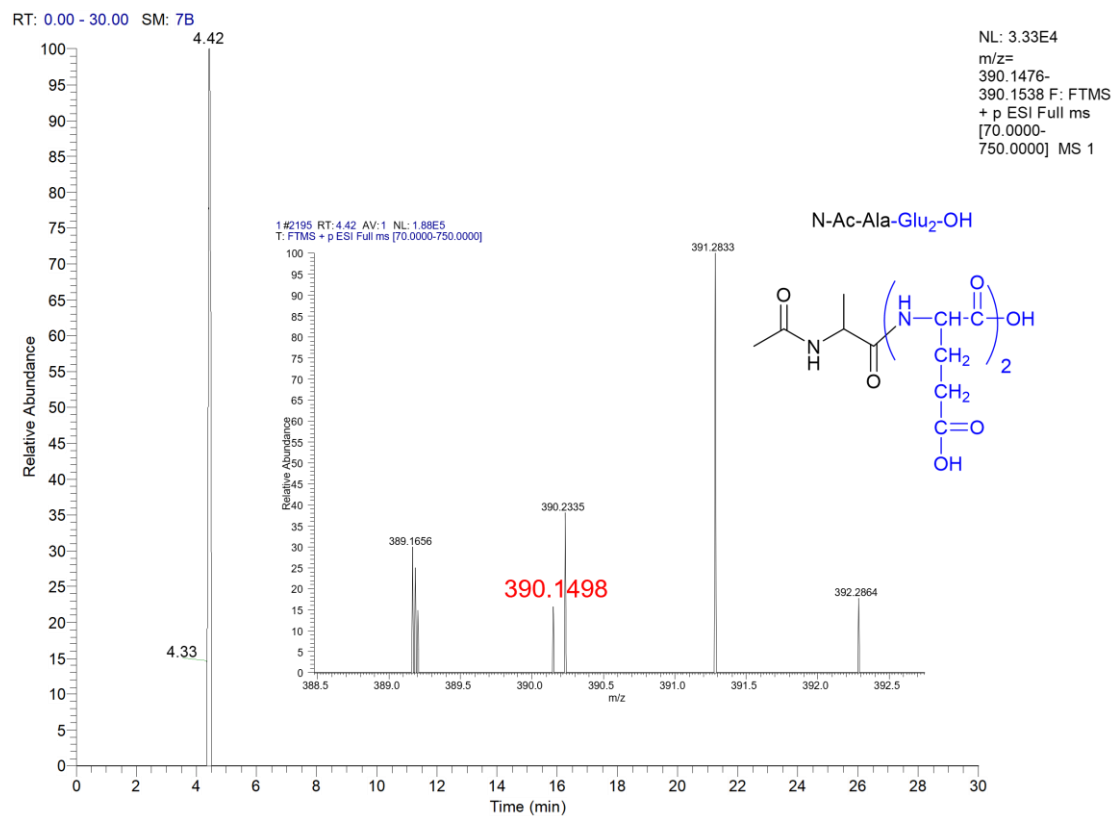

Fig. S19 Extraction ion chromatography-mass spectrometry analysis of the product. The EIC of m/z 390.1498 was analyzed, and its EIC corresponded to the tripeptide N-Ac-Ala-Glu<sub>2</sub>-OH with a retention time of 4.42 min.

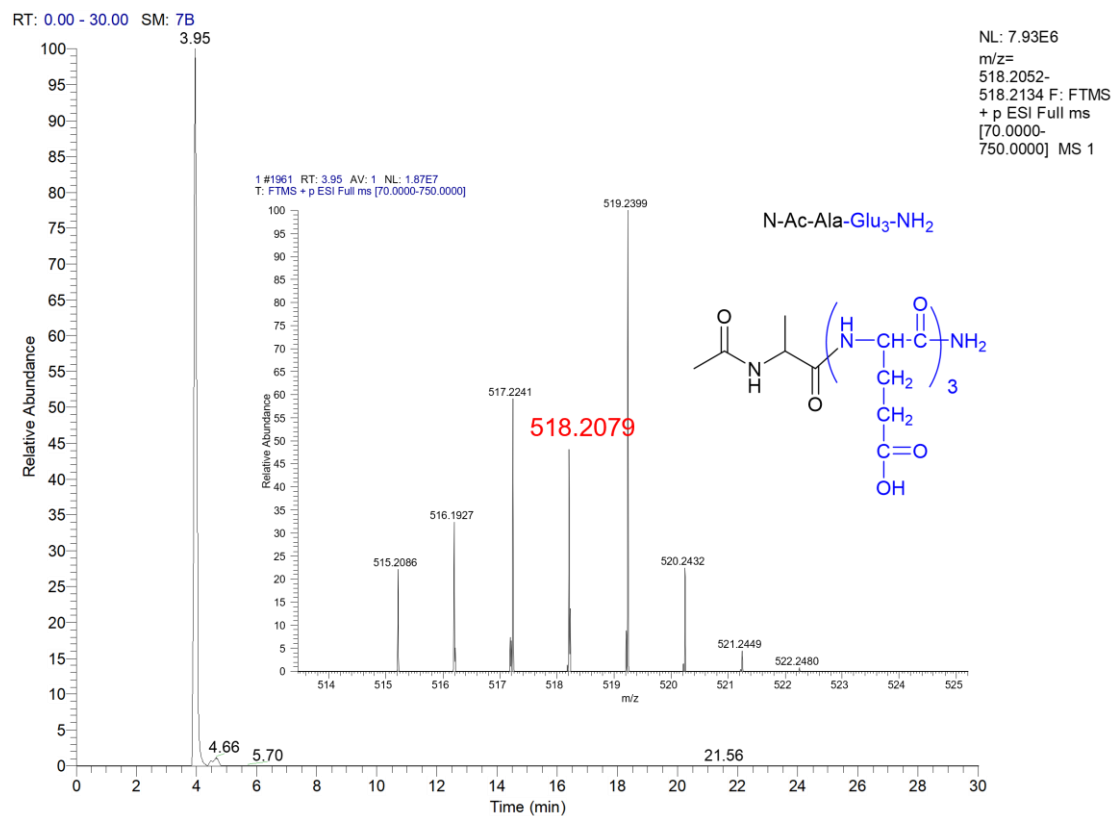

Fig. S20 Extraction ion chromatography-mass spectrometry analysis of the product. The EIC of  $m/z$  518.2079 was analyzed, and its EIC corresponded to the tetramer N-Ac-Ala-Glu<sub>3</sub>-NH<sub>2</sub> with a retention time of 3.95 min.

2.5 Oligomer produced by the polymerization of 0.1 M Ac-Ala-NH<sub>2</sub> and 0.1 M Ser-NH<sub>2</sub>. (Figs. S21-S26)

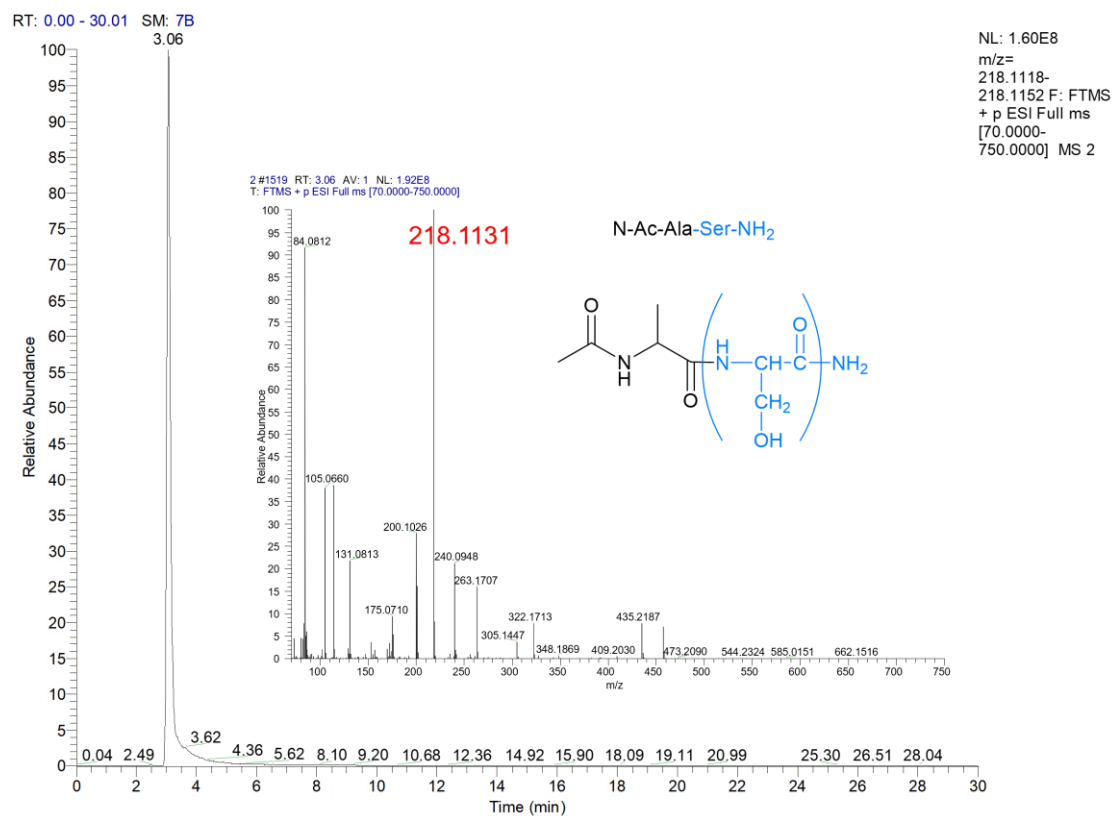

Fig. S21 Extraction ion chromatography-mass spectrometry analysis of the product. The EIC of m/z 218.1131 was analyzed and its EIC corresponded to the dimer N-Ac-Ala-Ser-NH<sub>2</sub> with a retention time of 3.06 min.

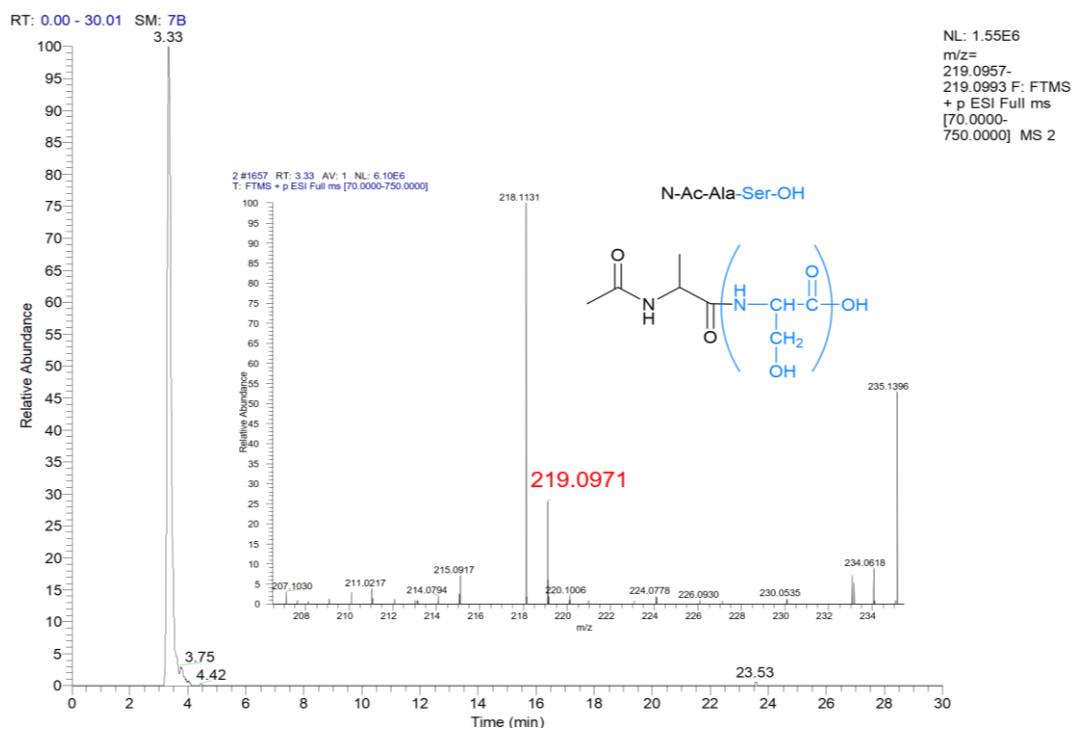

Fig. S22 Extraction ion chromatography-mass spectrometry analysis of the product. The EIC of m/z 219.0971 was analyzed and its EIC corresponded to the dipeptide N-Ac-Ala-Ser-OH with a retention time of 3.33 min.

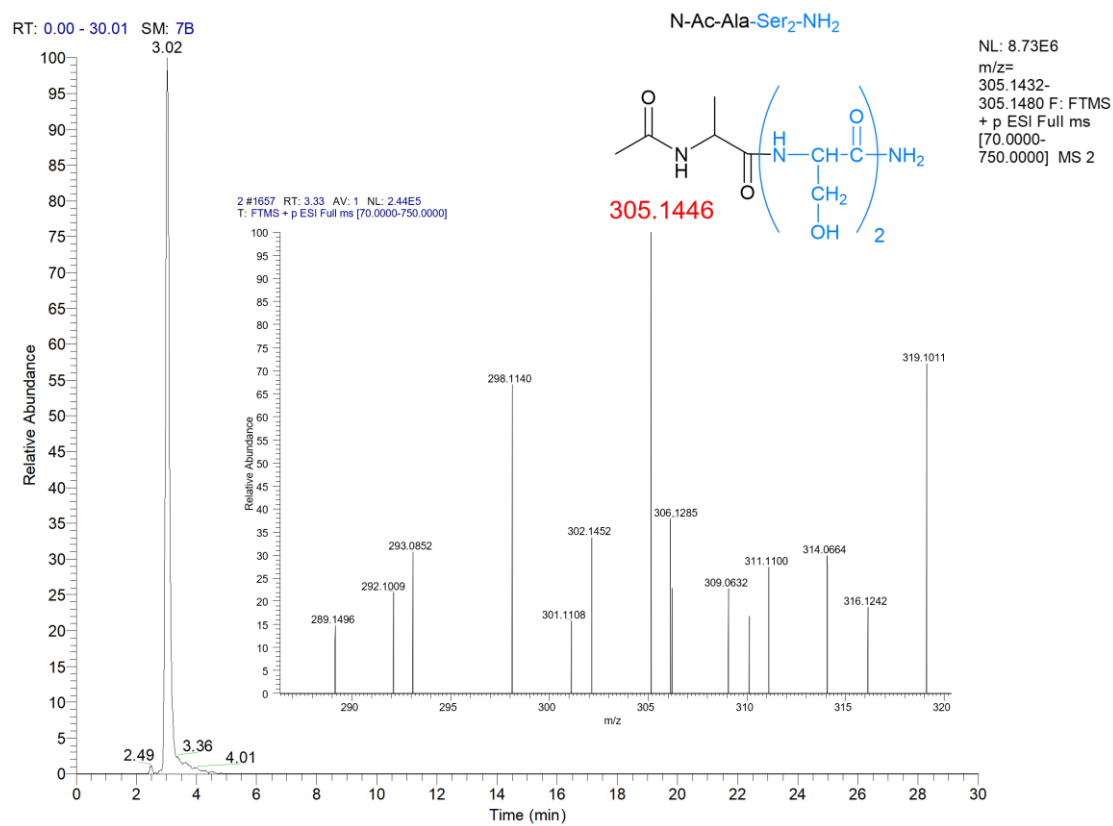

Fig. S23 Extraction ion chromatography-mass spectrometry analysis of the product. The EIC of m/z 305.1446 was analyzed and its EIC corresponded to the trimer N-Ac-Ala-Ser<sub>2</sub>-NH<sub>2</sub> with a retention time of 3.02 min.

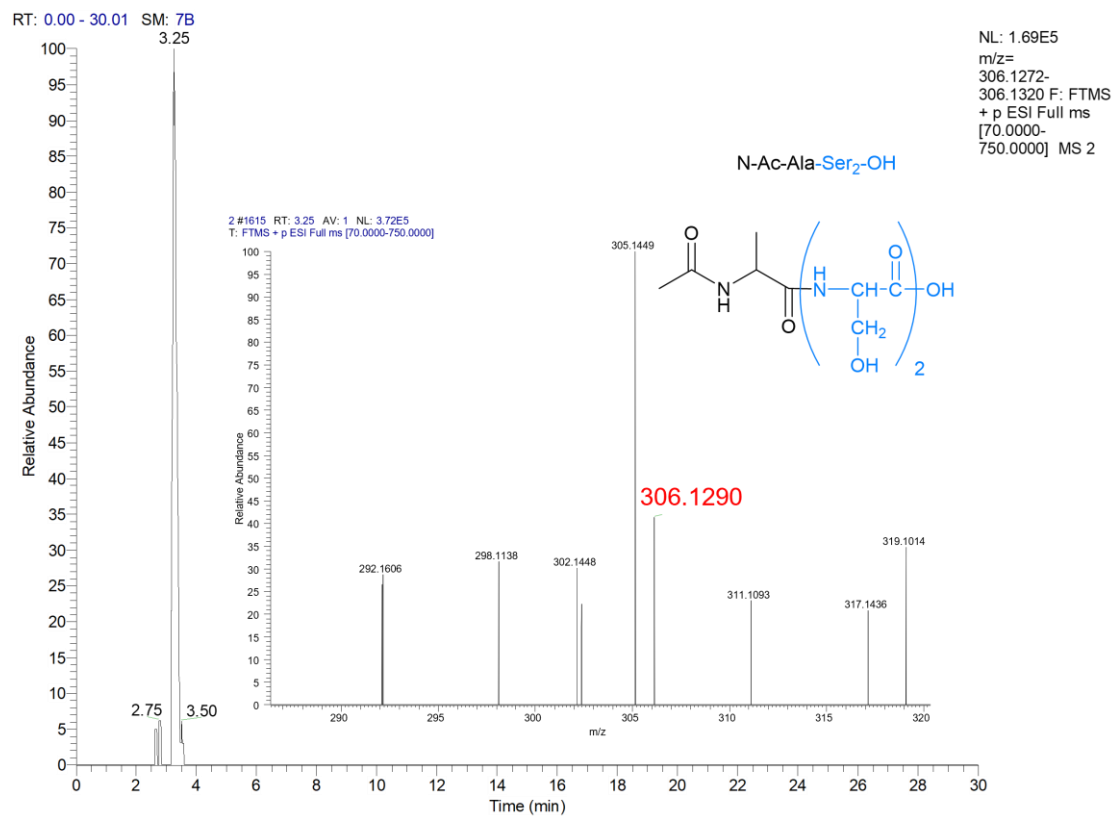

Fig. S24 Extraction ion chromatography-mass spectrometry analysis of the product. The EIC of m/z 306.1290 was analyzed and its EIC corresponded to the tripeptide N-Ac-Ala-Ser<sub>2</sub>-OH with a retention time of 3.25 min.

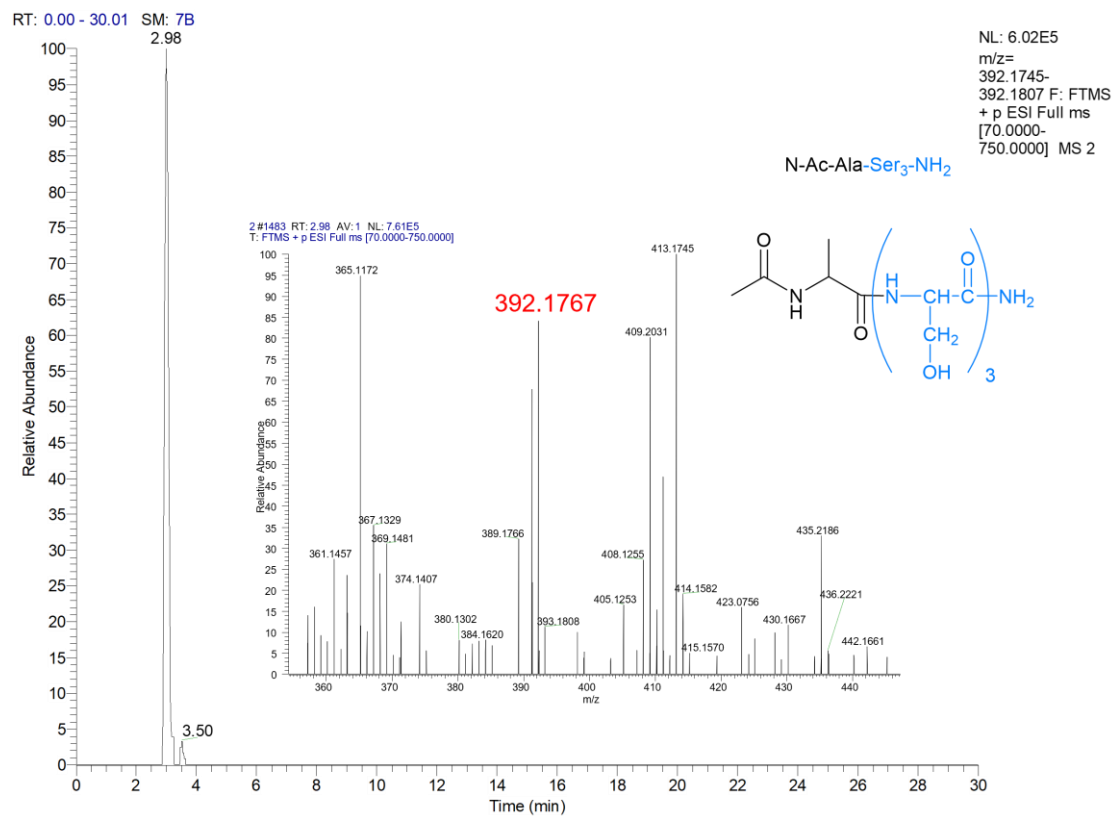

Fig. S25 Extraction ion chromatography-mass spectrometry analysis of the product. The EIC of m/z 392.1767 was analyzed and its EIC corresponded to the tracer N-Ac-Ala-Ser<sub>3</sub>-NH<sub>2</sub> with a retention time of 2.98 min.



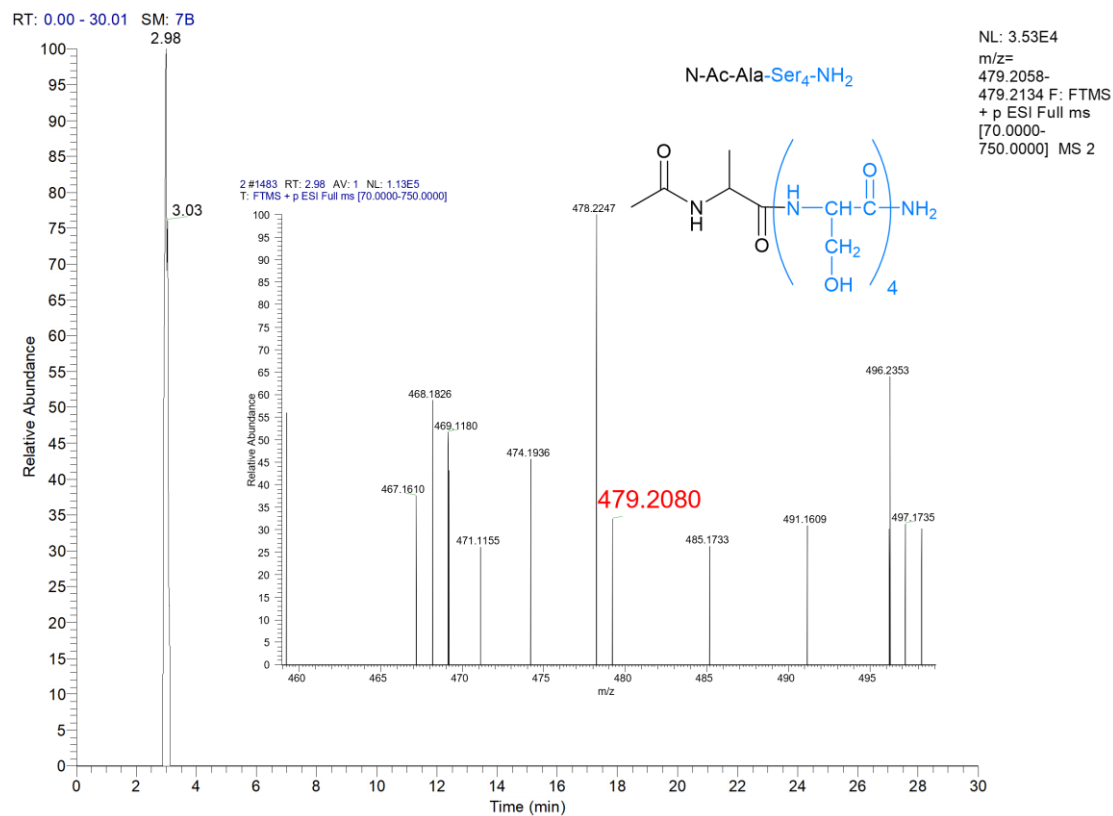

Fig. S26 Extraction ion chromatography-mass spectrometry analysis of the product. The EIC of  $m/z$  479.2080 was analyzed and its EIC corresponded to the pentamer N-Ac-Ala-Ser<sub>4</sub>-NH<sub>2</sub> with a retention time of 2.98 min.

2.6 Oligomer produced by the polymerization of 0.1 M Ac-Ala-NH<sub>2</sub> and 0.1 M Val-NH<sub>2</sub>. (Figs. S27-S30)

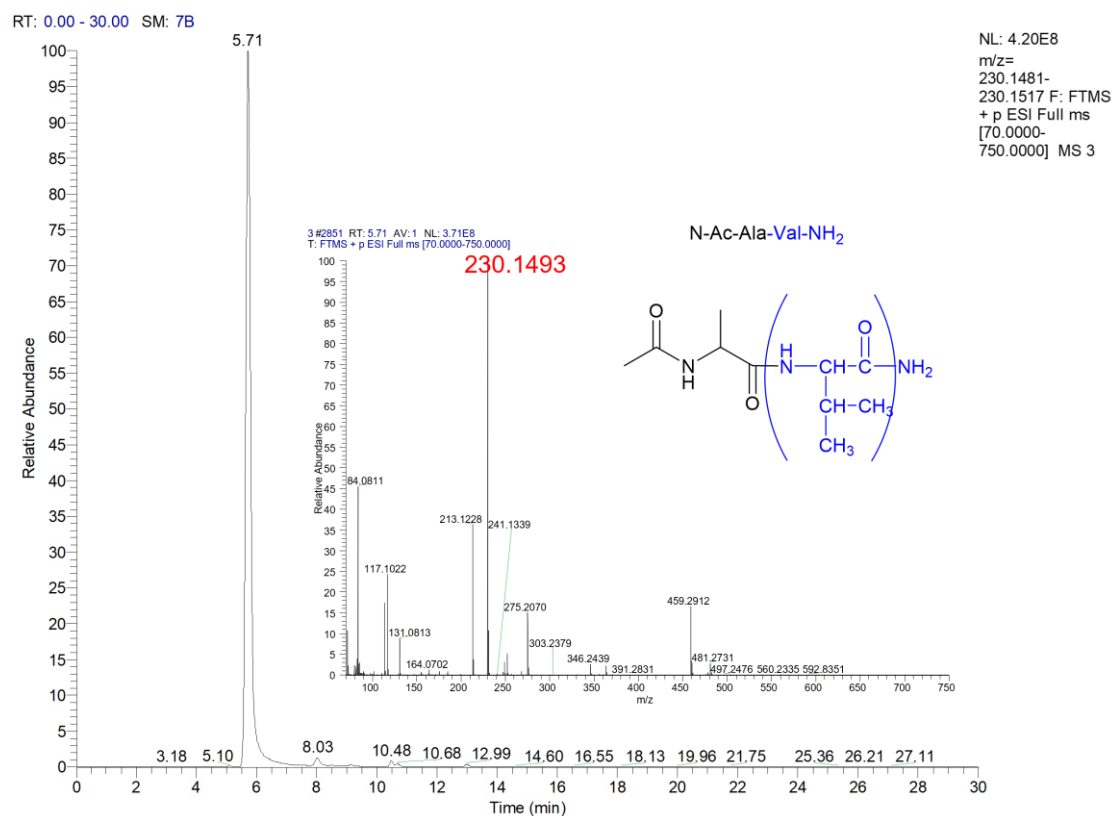

Fig. S27 Extraction ion chromatography-mass spectrometry analysis of the product. The EIC of m/z 230.1493 was analyzed and its EIC corresponded to the dimer N-Ac-Ala-Val-NH<sub>2</sub> with a retention time of 5.71 min.

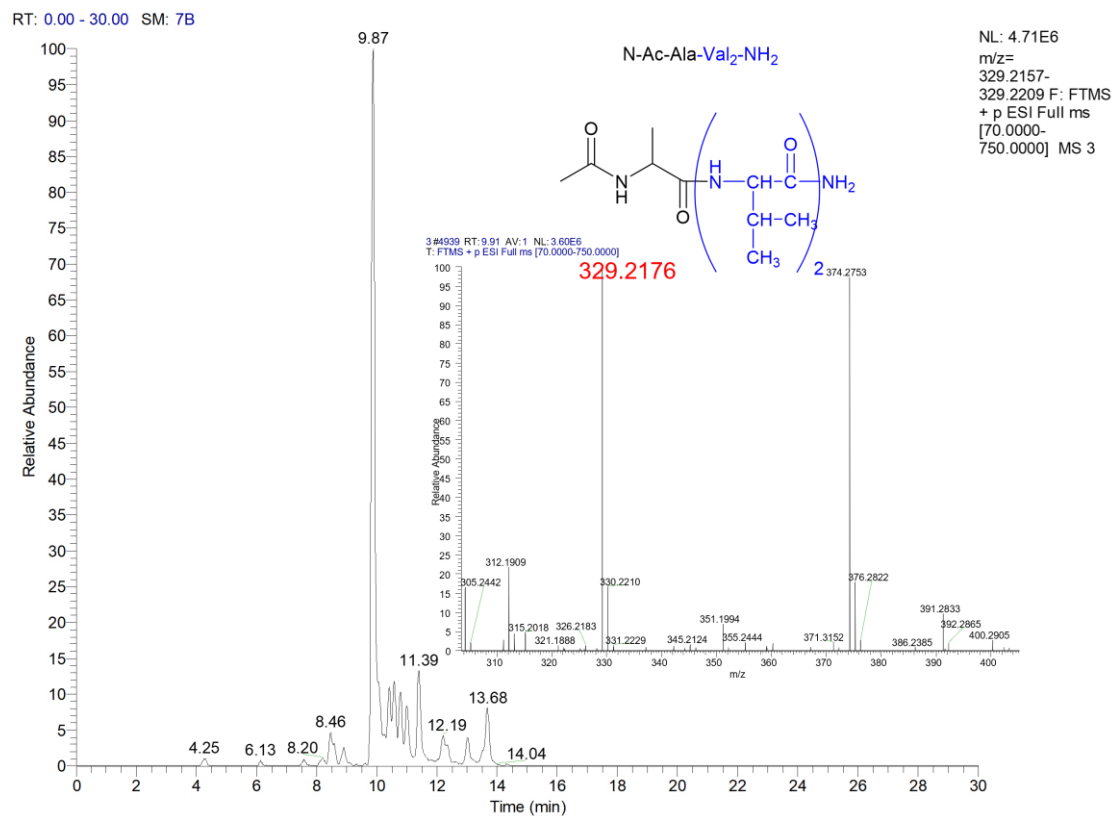

Fig. S28 Extraction ion chromatography-mass spectrometry analysis of the product. The EIC of m/z 329.2176 was analyzed and the EIC corresponds to the trimer N-Ac-Ala-Val<sub>2</sub>-NH<sub>2</sub> with a retention time of 9.87 min.

RT: 0.00 - 30.00 SM: 7B

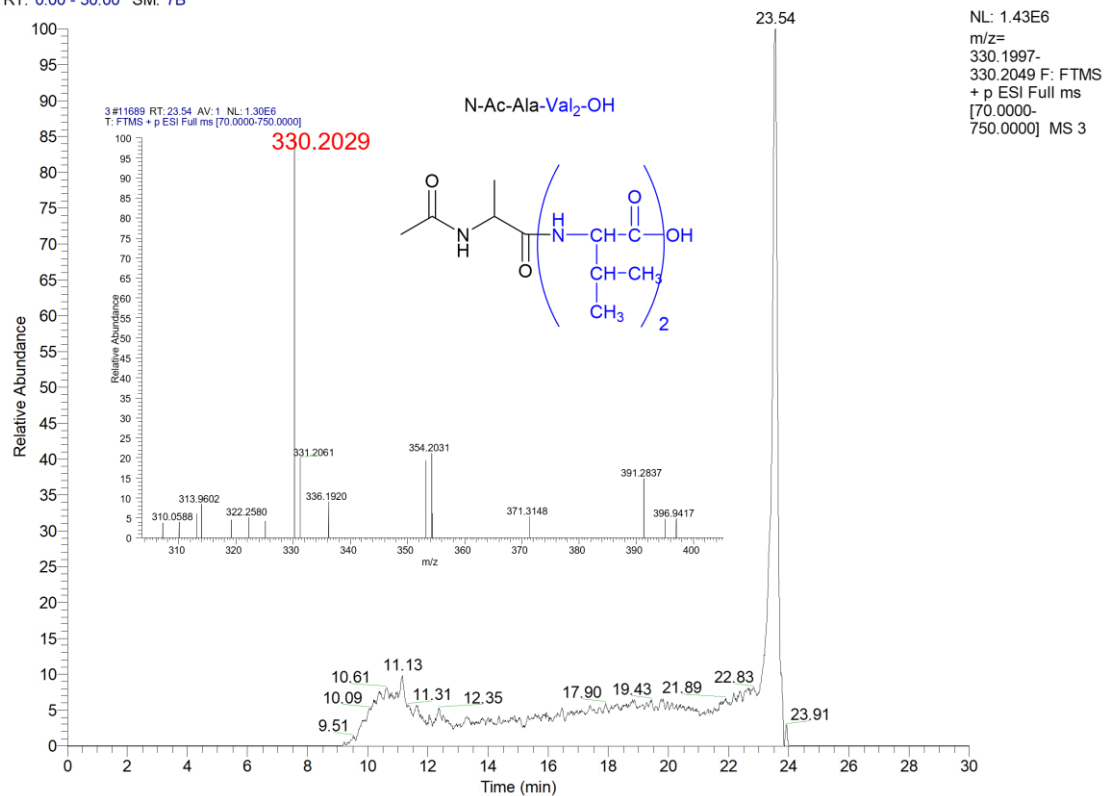

Fig. S29 Extraction ion chromatography-mass spectrometry analysis of the product. The EIC of  $m/z$  330.2029 was analyzed and its EIC corresponded to the tripeptide N-Ac-Ala-Val<sub>2</sub>-OH with a retention time of 23.54 min.

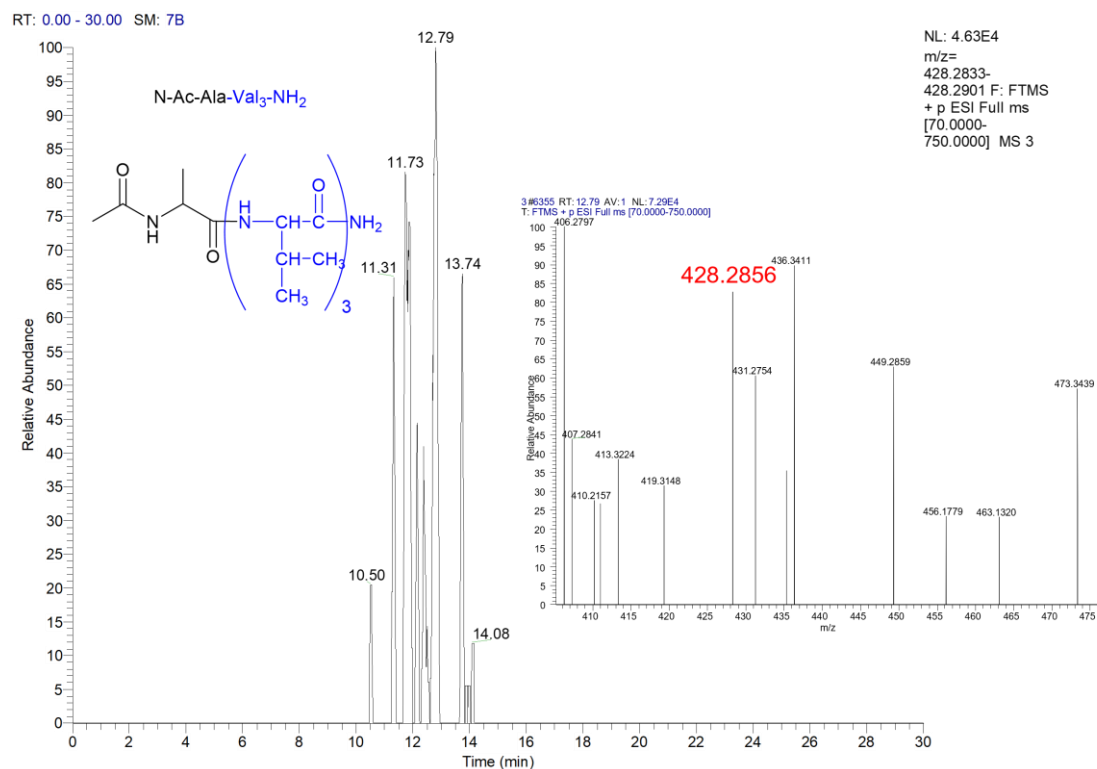

Fig. S30 Extraction ion chromatography-mass spectrometry analysis of the product. The EIC of m/z 428.2856 was analyzed and its EIC corresponded to the tetramer N-Ac-Ala-Val<sub>3</sub>-NH<sub>2</sub> with a retention time of 12.79 min.

2.7 Oligomer produced by the polymerization of 0.1 M Ac-Ala-NH<sub>2</sub> and 0.1 M Arg-NH<sub>2</sub>. (Figs. S31-S32)

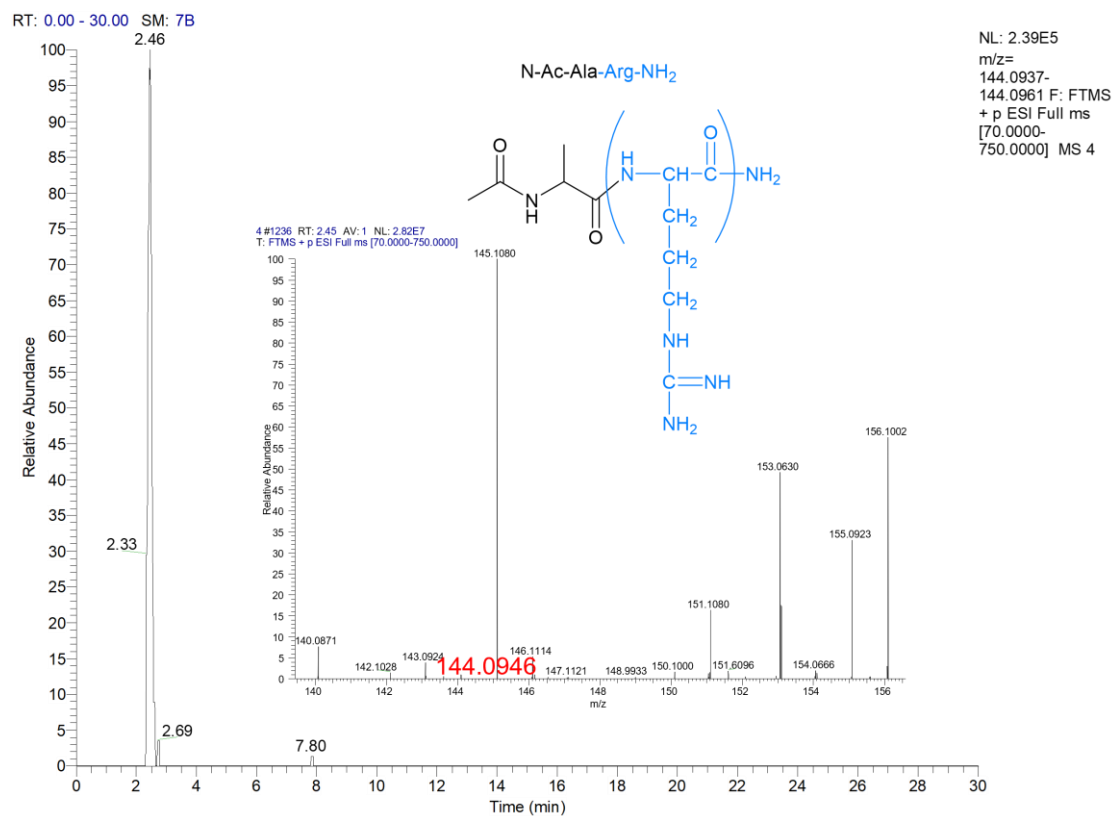

Fig. S31 Extraction ion chromatography-mass spectrometry analysis of the product. The EIC of m/z 144.0946 was analyzed and its EIC corresponded to the dimer N-Ac-Ala-Arg-NH<sub>2</sub> with a retention time of 2.46 min.

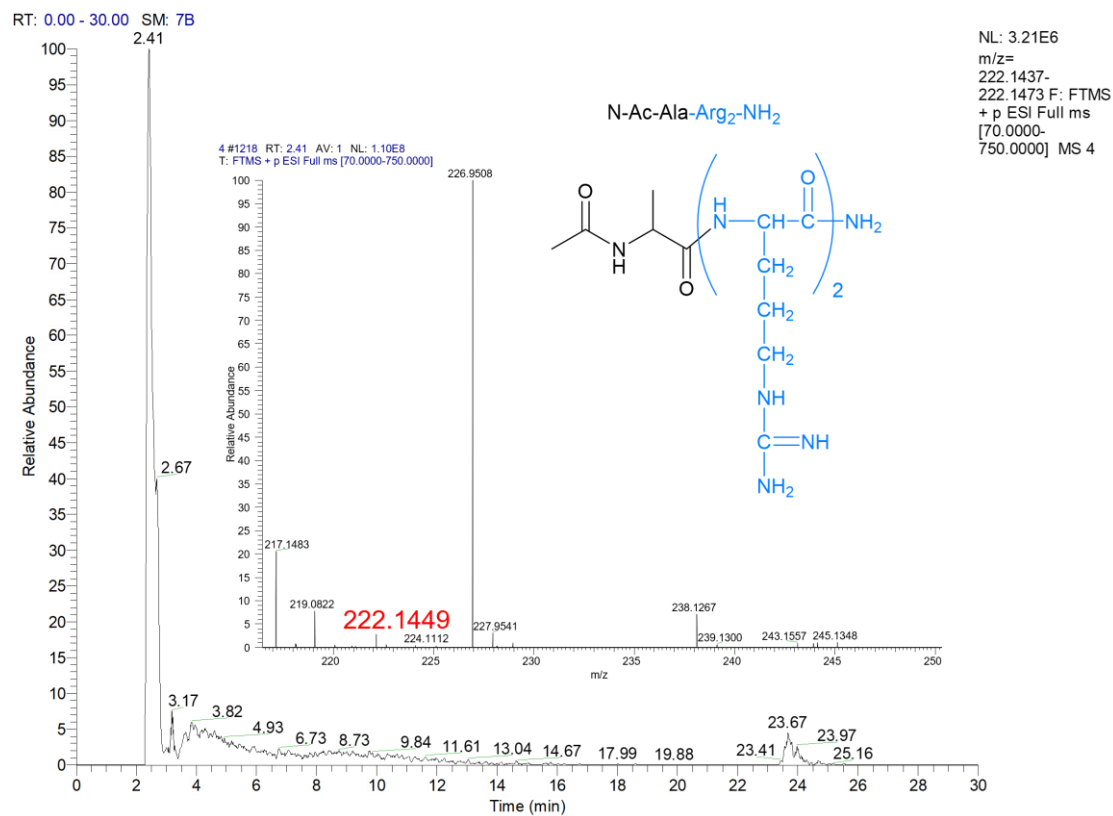

Fig. S32 Extraction ion chromatography-mass spectrometry analysis of the product. The EIC of m/z 222.1449 was analyzed and its EIC corresponded to the trimer N-Ac-Ala-Arg<sub>2</sub>-NH<sub>2</sub> with a retention time of 2.41 min.

## 2.8 Oligomer produced by the polymerization of 0.1M Ac-Ala-NH<sub>2</sub> and 0.1M Lys-NH<sub>2</sub>.

(Figs. S33-S36)

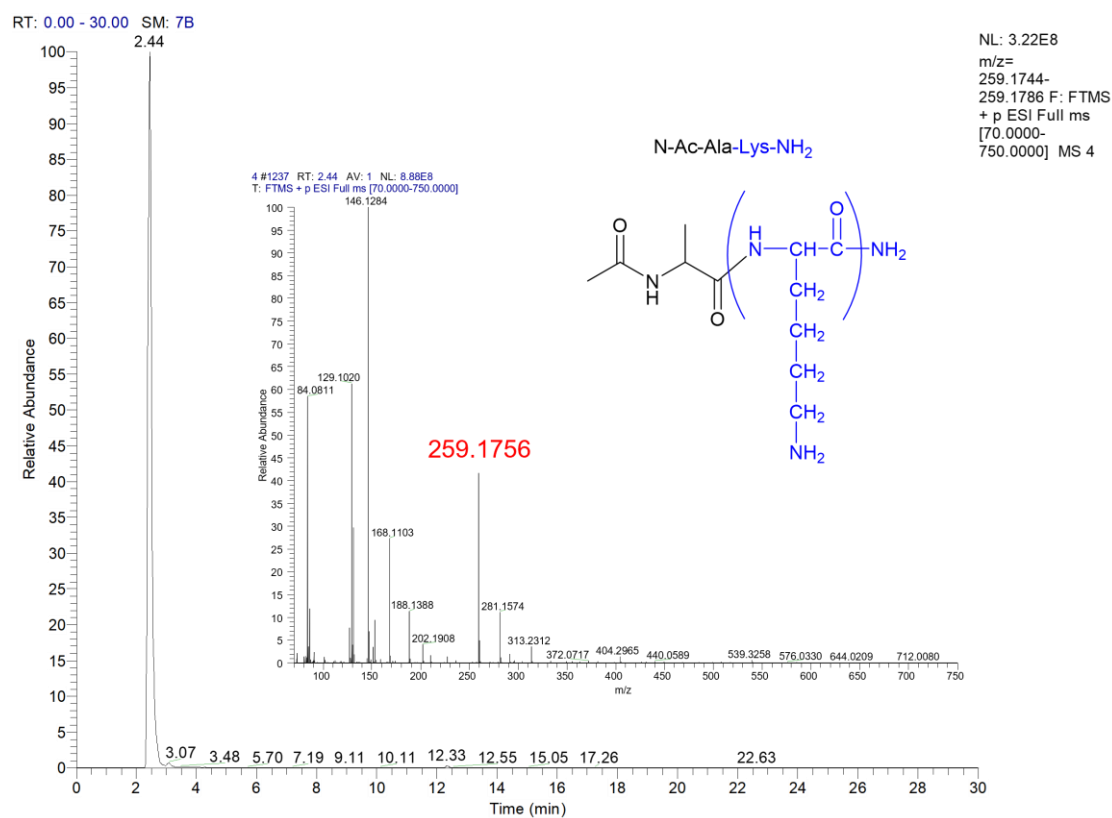

Fig. S33 Extraction ion chromatography-mass spectrometry analysis of the product. The EIC of  $m/z$  259.1756 was analyzed, and its EIC corresponds to the dimer N-Ac-Ala-Lys-NH<sub>2</sub> with a retention time of 2.44 min.



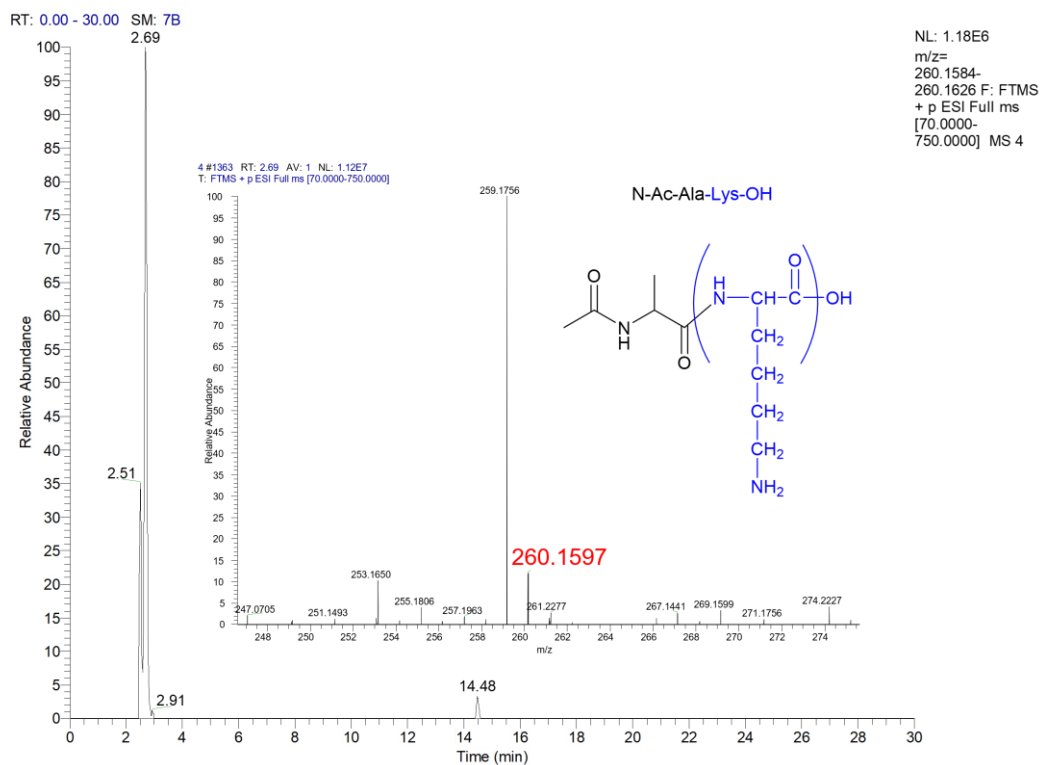

Fig. S34 Extraction ion chromatography-mass spectrometry analysis of the product. The EIC of  $m/z$  260.1597 was analyzed and its EIC corresponded to the dipeptide N-Ac-Ala-Lys-OH with a retention time of 2.69 min.

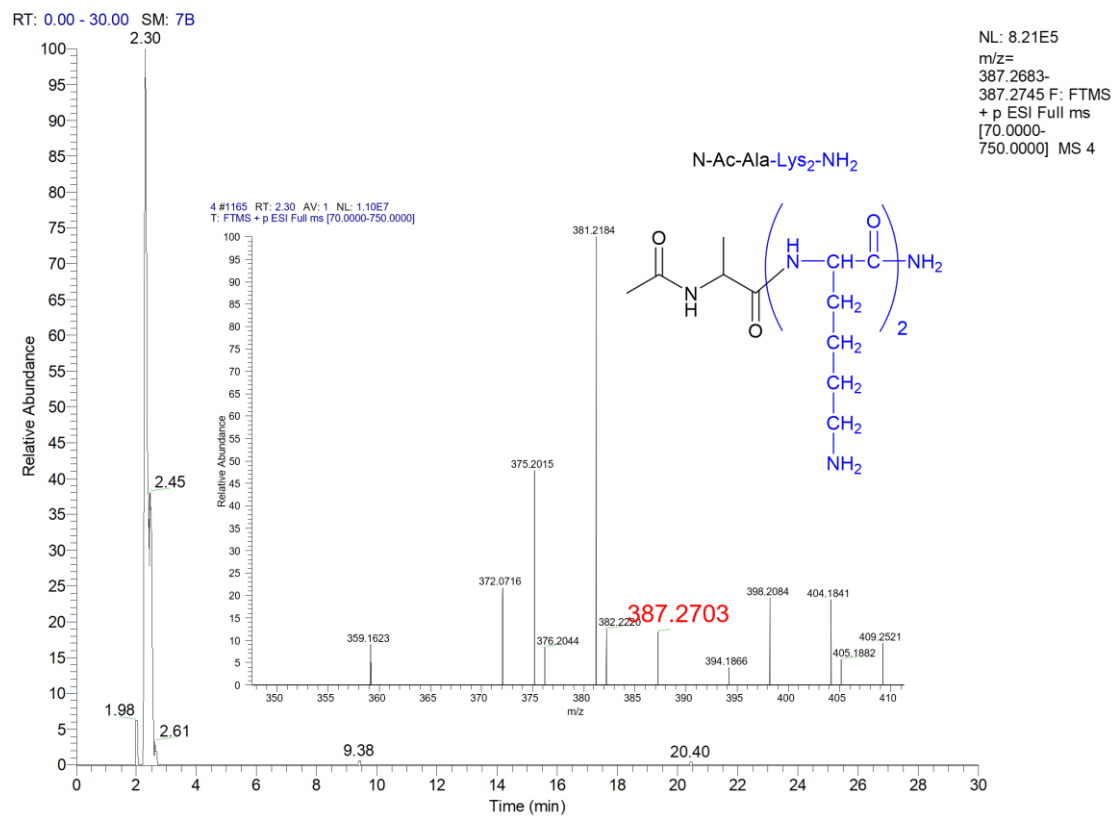

Fig. S35 Extraction ion chromatography-mass spectrometry analysis of the product. The EIC of m/z 387.2703 has been analyzed and its EIC corresponds to the trimer N-Ac-Ala-Lys<sub>2</sub>-NH<sub>2</sub> with a retention time of 2.30 min.

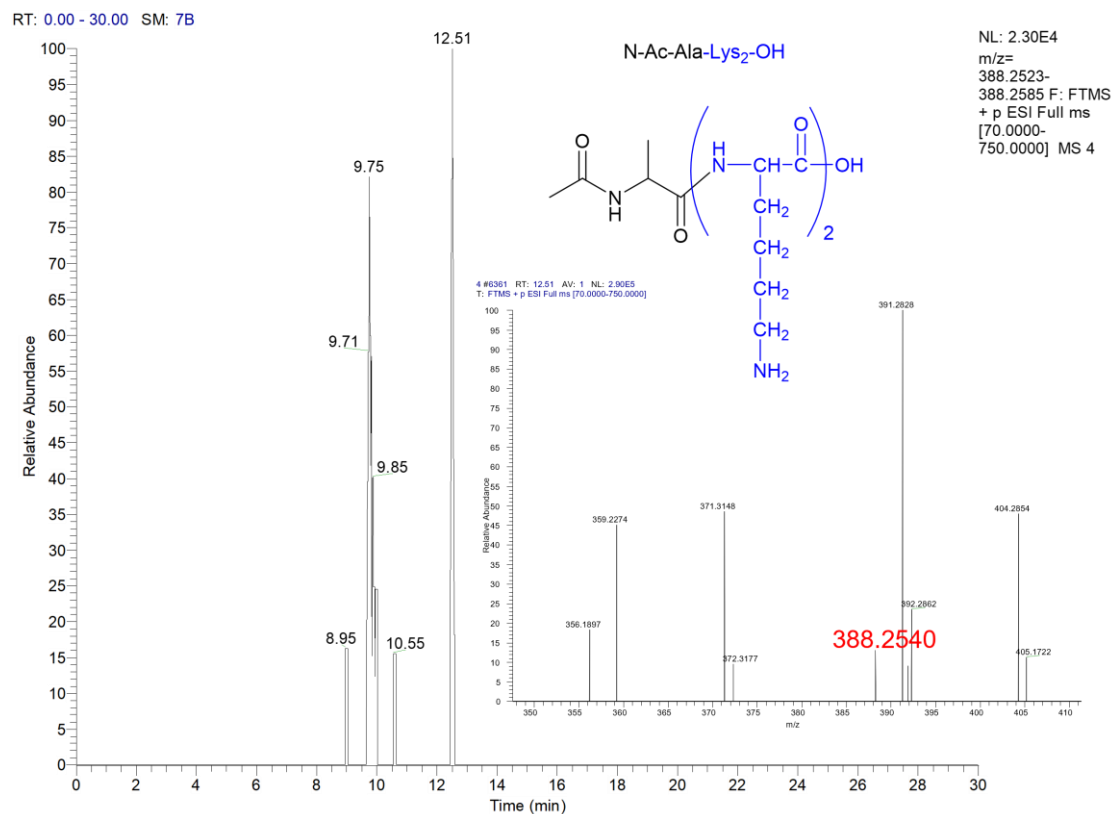

Fig. S36 Extraction ion chromatography-mass spectrometry analysis of the product. The EIC of m/z 388.2540 was analyzed and its EIC corresponded to the tripeptide N-Ac-Ala-Lys<sub>2</sub>-OH with a retention time of 12.51 min.

2.9 Oligomer produced by the polymerization of 0.1 M Ac-Ala-NH<sub>2</sub> and 0.1 M Leu-NH<sub>2</sub>. (Figs. S37-S39)

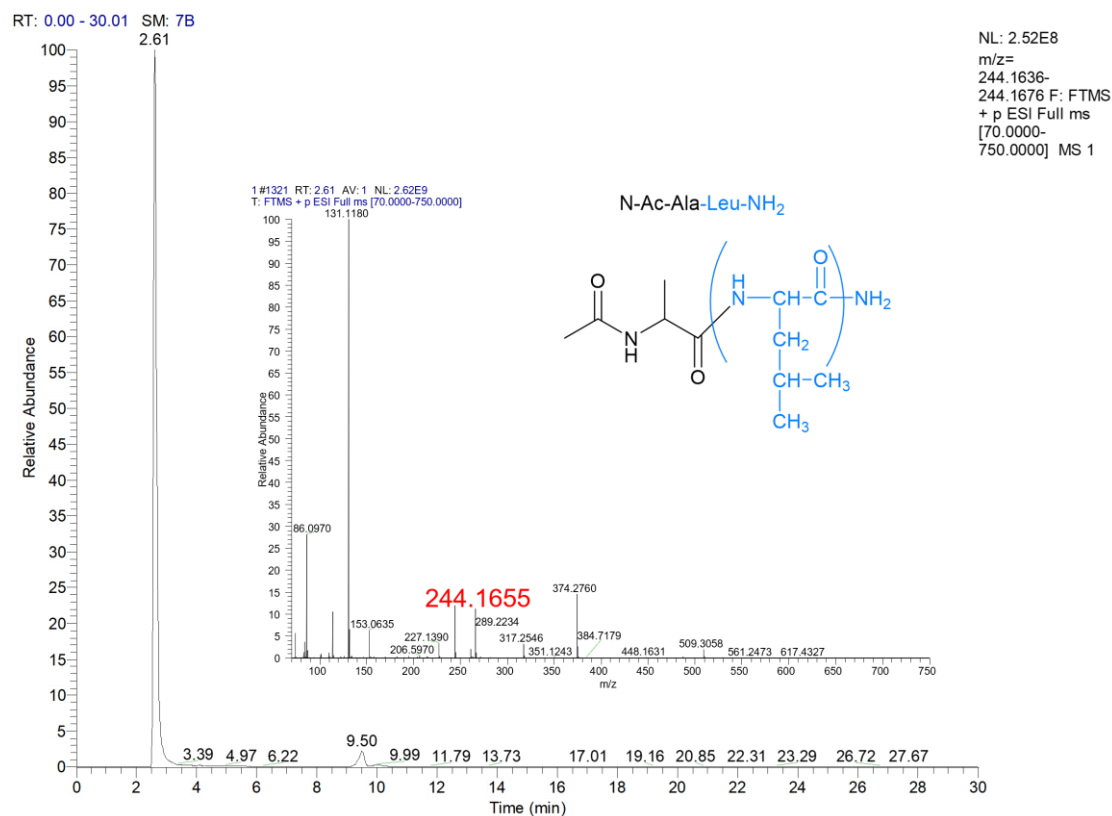

Fig. S37 Extraction ion chromatography-mass spectrometry analysis of the product. The EIC of  $m/z$  244.1655 was analyzed and its EIC corresponded to the dimer N-Ac-Ala-Leu-NH<sub>2</sub> with a retention time of 2.61 min.

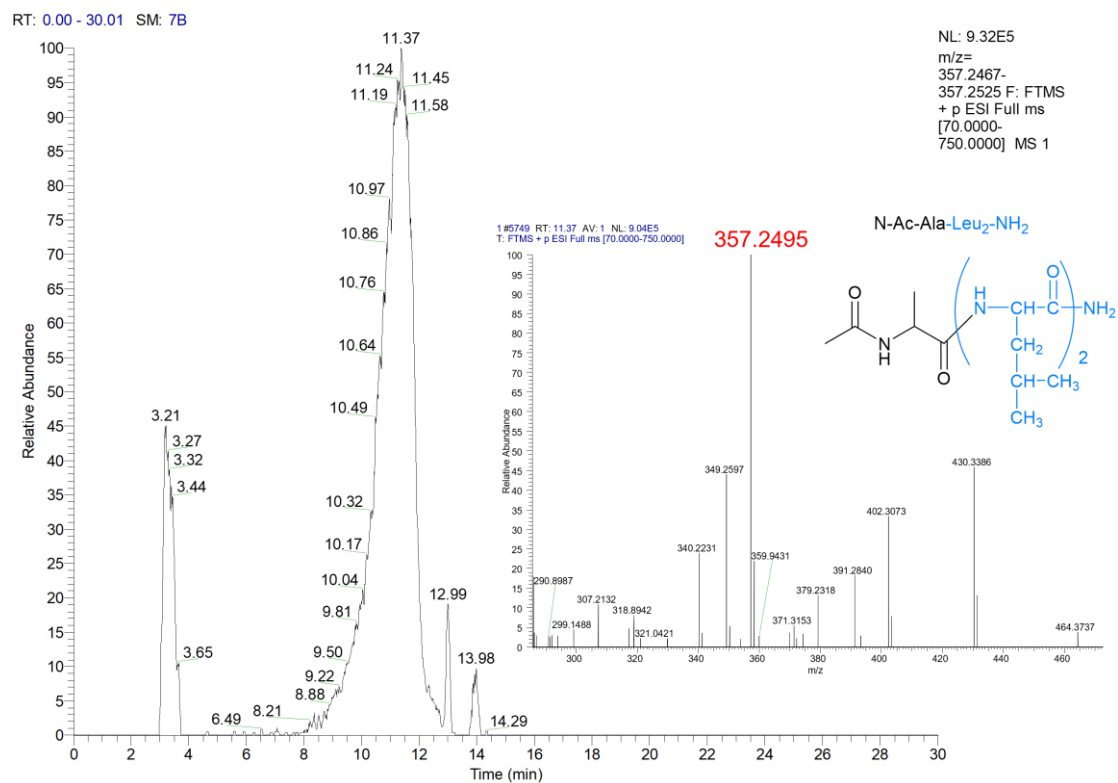

Fig. S38 Extraction ion chromatography-mass spectrometry analysis of the product. The EIC of m/z 357.2495 was analyzed and its EIC corresponds to the trimer N-Ac-Ala-Leu<sub>2</sub>-NH<sub>2</sub> with a retention time of 11.37 min.

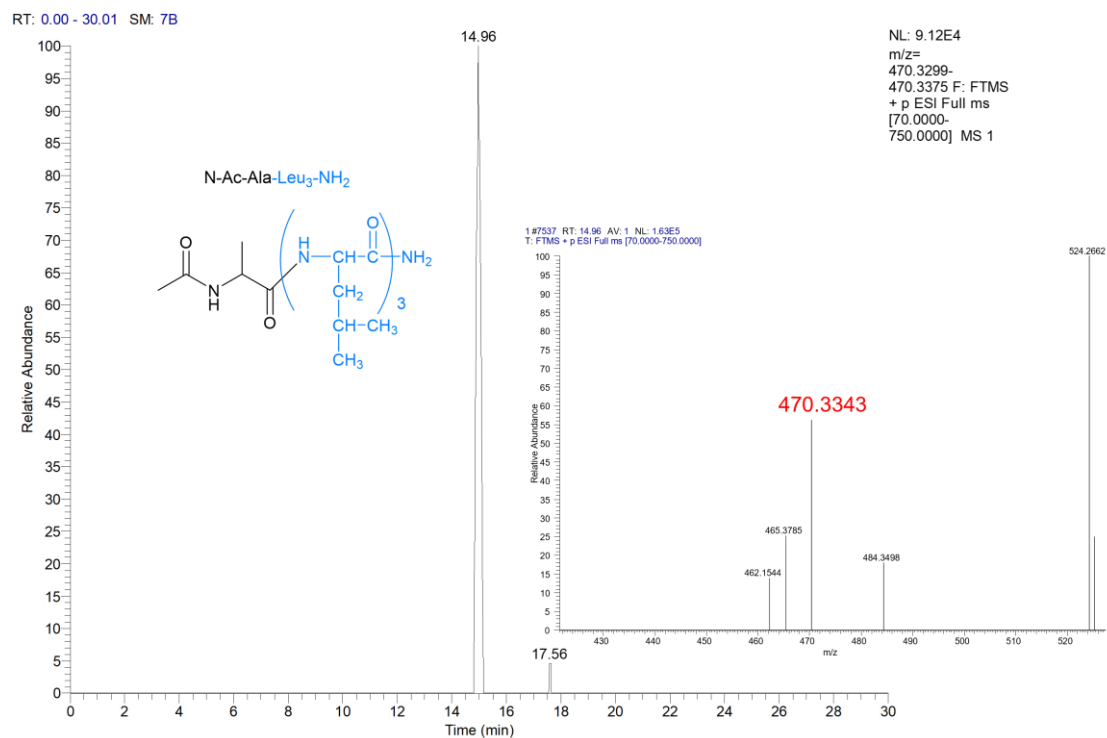

Fig. S39 Extraction ion chromatography-mass spectrometry analysis of the product. The EIC of  $m/z$  470.3343 was analyzed and its EIC corresponded to the tetramer N-Ac-Ala-Leu<sub>3</sub>-NH<sub>2</sub> with a retention time of 14.96 min.

2.10 Oligomer produced by the polymerization of 0.1 M Ac-Ala-NH<sub>2</sub> and 0.1 M Pro-NH<sub>2</sub>. (Figs. S40-S43)

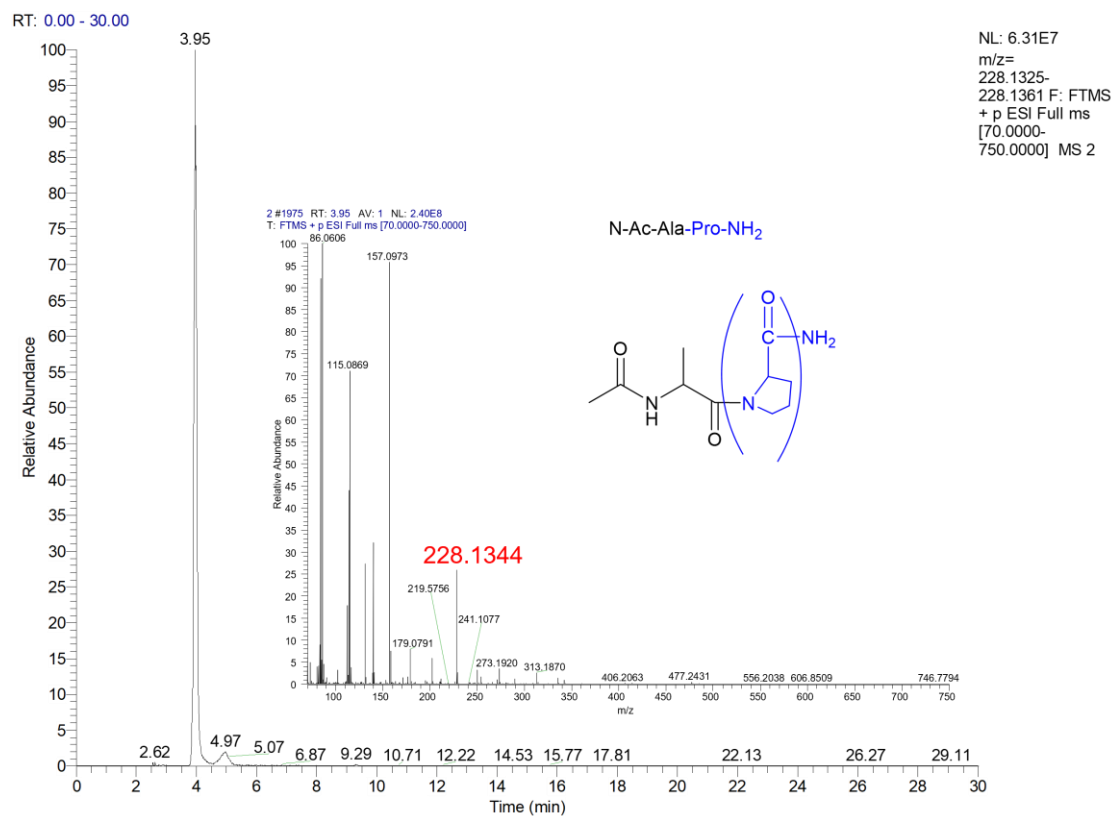

Fig. S40 Extraction ion chromatography-mass spectrometry analysis of the product. The EIC of m/z 228.1344 was analyzed and its EIC corresponds to the dimer N-Ac-Ala-Pro-NH<sub>2</sub> with a retention time of 3.95 min.

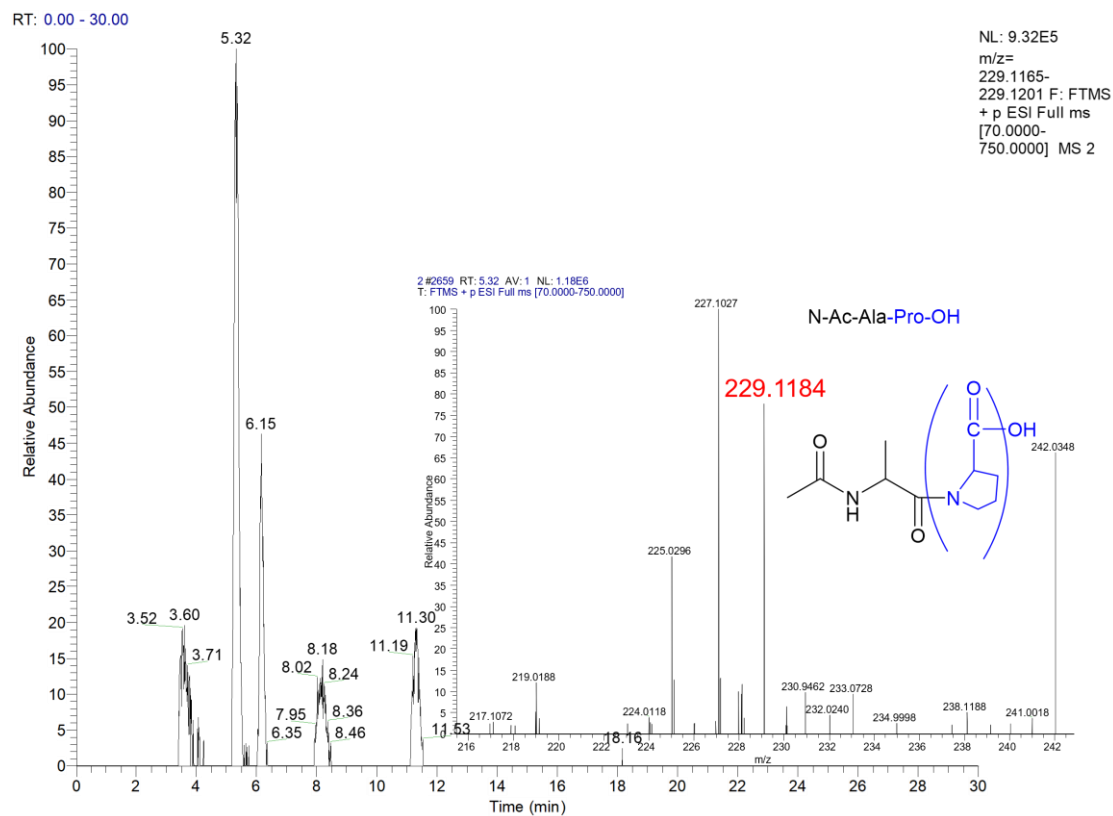

Fig. S41 Extraction ion chromatography-mass spectrometry analysis of the product. The EIC of  $m/z$  229.1184 was analyzed, and its EIC corresponded to the dipeptide N-Ac-Ala-Pro-OH with a retention time of 5.32 min.



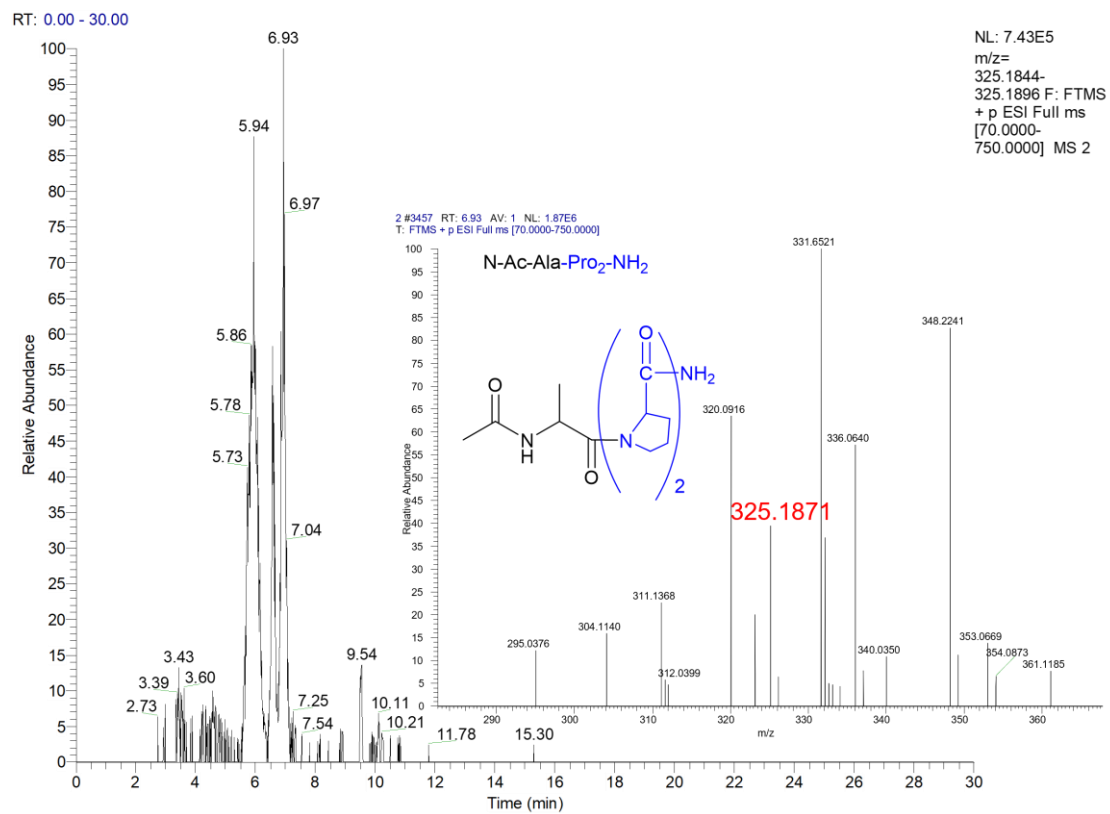

Fig. S42 Extraction ion chromatography-mass spectrometry analysis of the product. The EIC of m/z 325.1871 was analyzed and its EIC corresponded to the trimer N-Ac-Ala-Pro<sub>2</sub>-NH<sub>2</sub> with a retention time of 6.93 min.

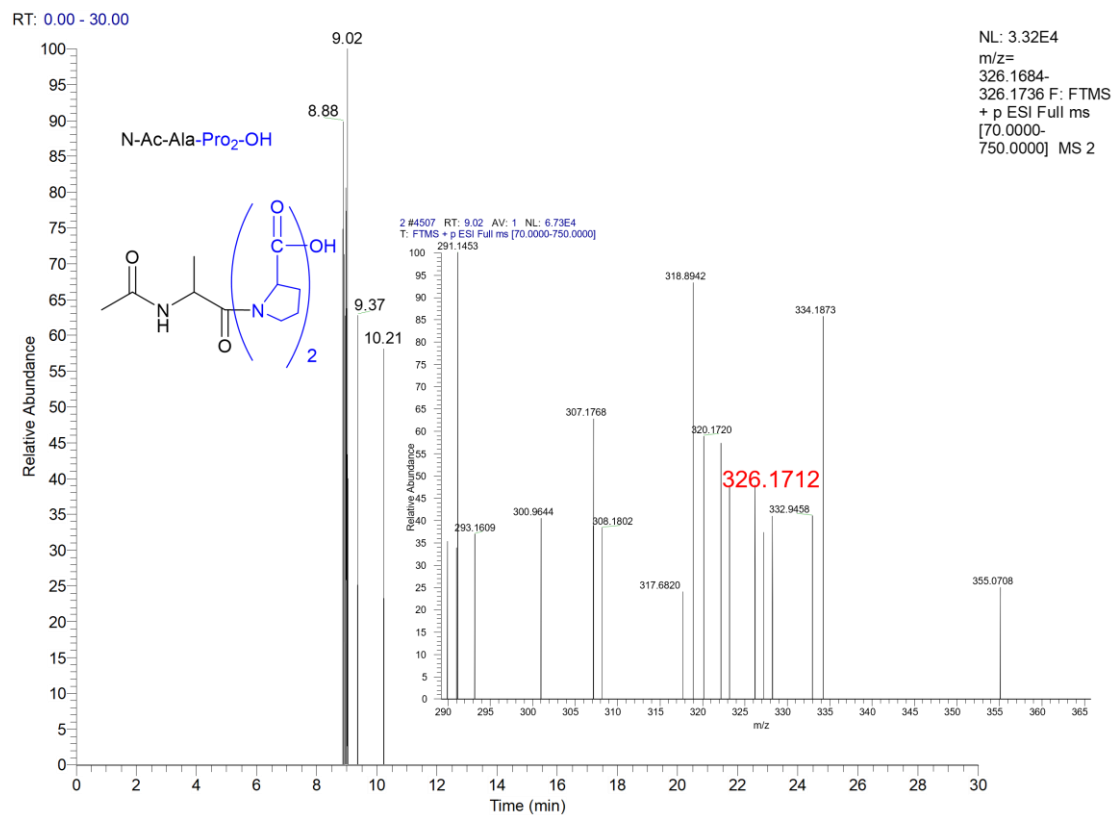

Fig. S43 Extraction ion chromatography-mass spectrometry analysis of the product. The EIC of  $m/z$  326.1712 was analyzed, and its EIC corresponded to the tripeptide N-Ac-Ala-Pro<sub>2</sub>-OH with a retention time of 9.02 min.

2.11 Oligomer produced by the polymerization of 0.1 M Ac-Ala-NH<sub>2</sub> and 0.1 M Phe-NH<sub>2</sub>. (Figs. S44-S48)

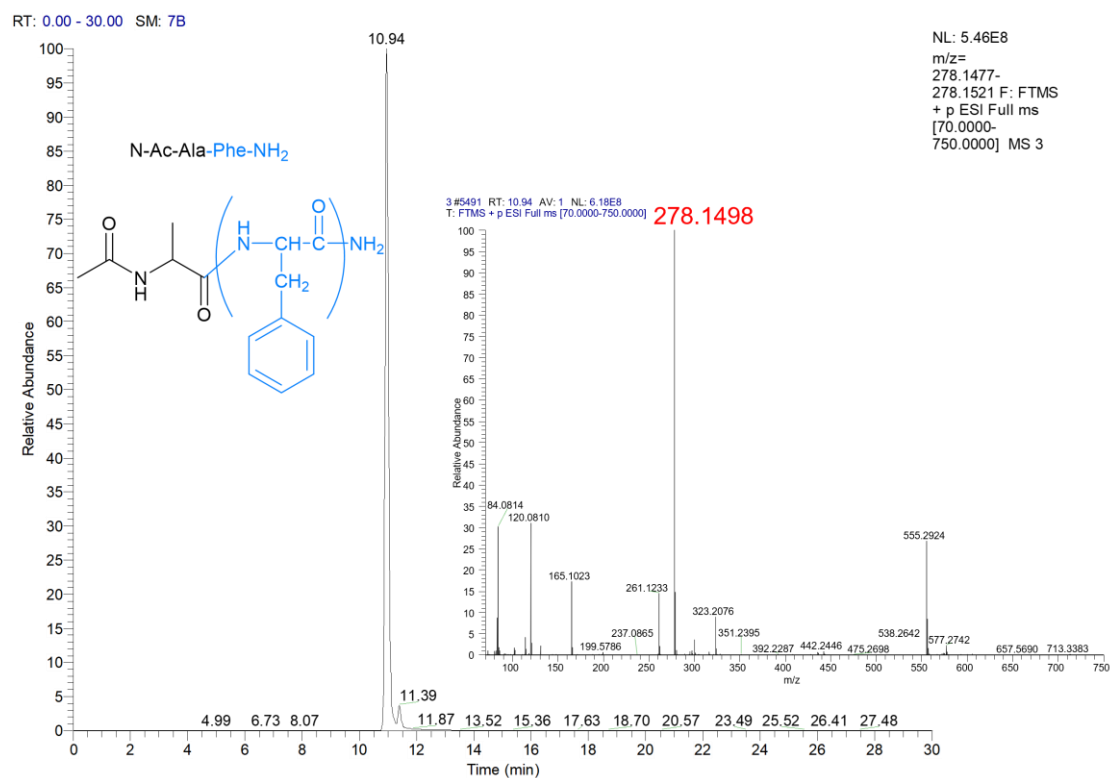

Fig. S44 Extraction ion chromatography-mass spectrometry analysis of the product. The EIC of m/z 278.1498 was analyzed, and its EIC corresponds to the dimer N-Ac-Ala-Phe-NH<sub>2</sub> with a retention time of 10.94 min.

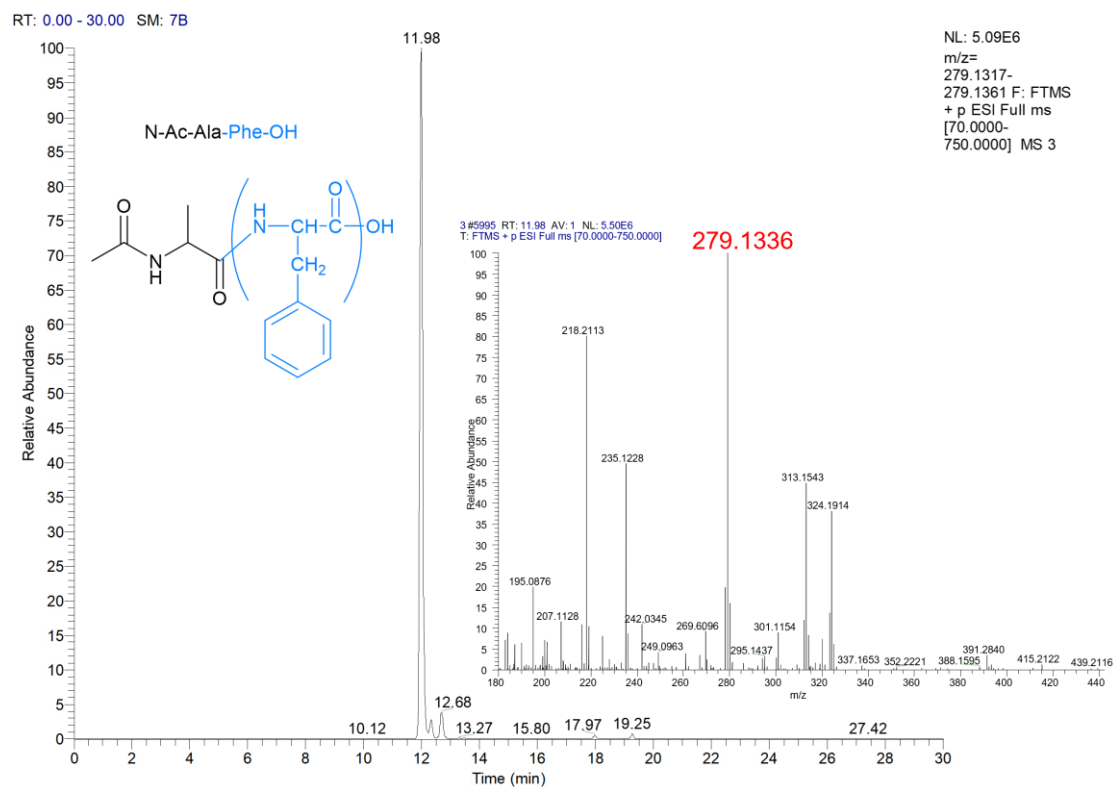

Fig. S45 Extraction ion chromatography-mass spectrometry analysis of the product. The EIC of  $m/z$  279.1336 was analyzed and its EIC corresponded to the dipeptide N-Ac-Ala-Phe-OH with a retention time of 11.98 min.

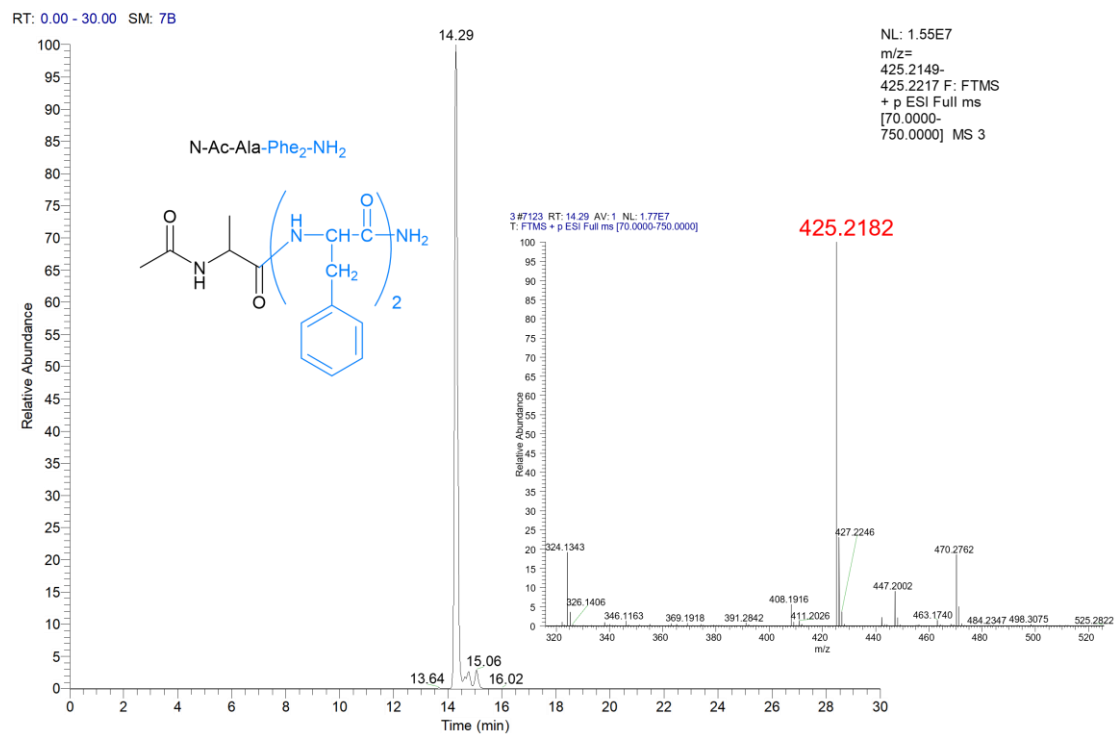

Fig. S46 Extraction ion chromatography-mass spectrometry analysis of the product. The EIC of  $m/z$  425.2182 was analyzed and its EIC corresponded to the trimer N-Ac-Ala-Phe<sub>2</sub>-NH<sub>2</sub> with a retention time of 14.29 min.

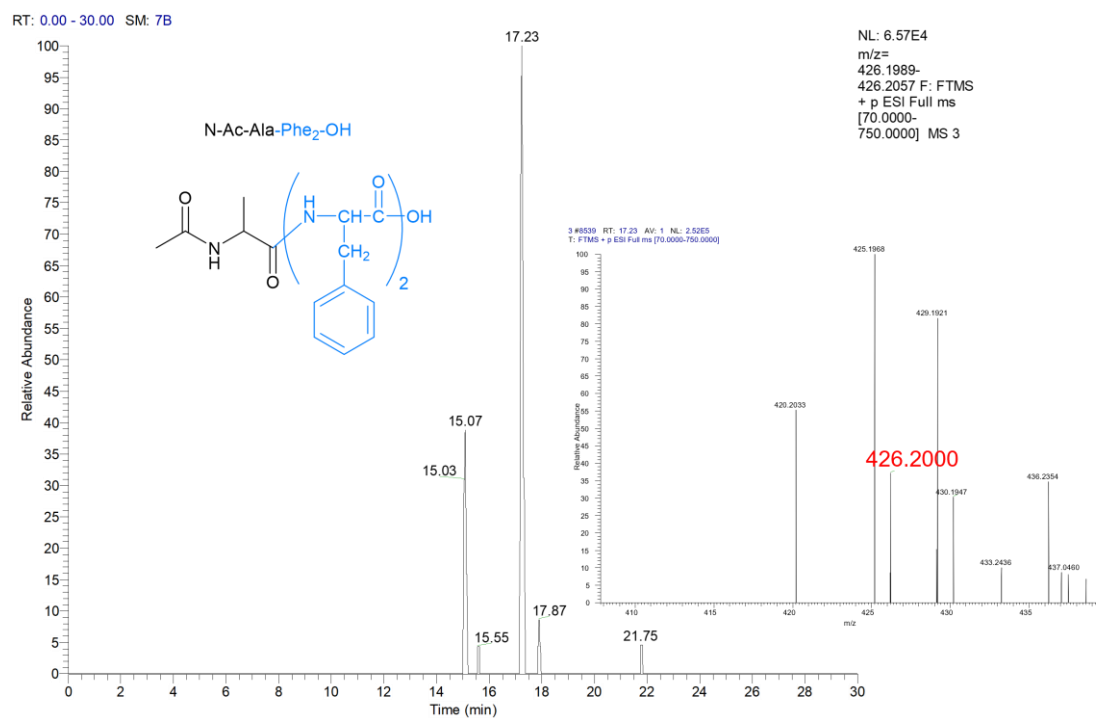

Fig. S47 Extraction ion chromatography-mass spectrometry analysis of the product. The EIC of  $m/z$  426.2000 was analyzed and its EIC corresponded to the tripeptide N-Ac-Ala-Phe<sub>2</sub>-OH with a retention time of 17.23 min.

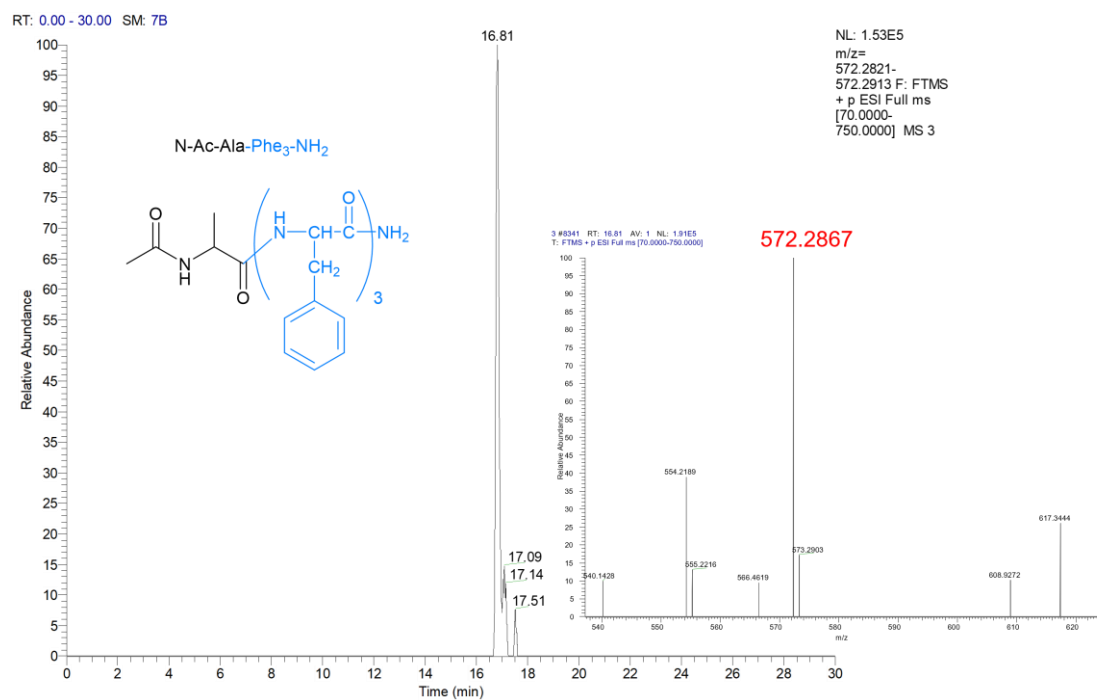

Fig. S48 Extraction ion chromatography-mass spectrometry analysis of the product. The EIC of  $m/z$  572.2867 was analyzed, and its EIC corresponded to the tetramer N-Ac-Ala-Phe<sub>3</sub>-NH<sub>2</sub> with a retention time of 16.81 min.

2.12 Oligomer produced by the polymerization of 0.1 M Ac-Ala-NH<sub>2</sub> and 0.1 M Ile-NH<sub>2</sub>. (Figs. S49-S51)

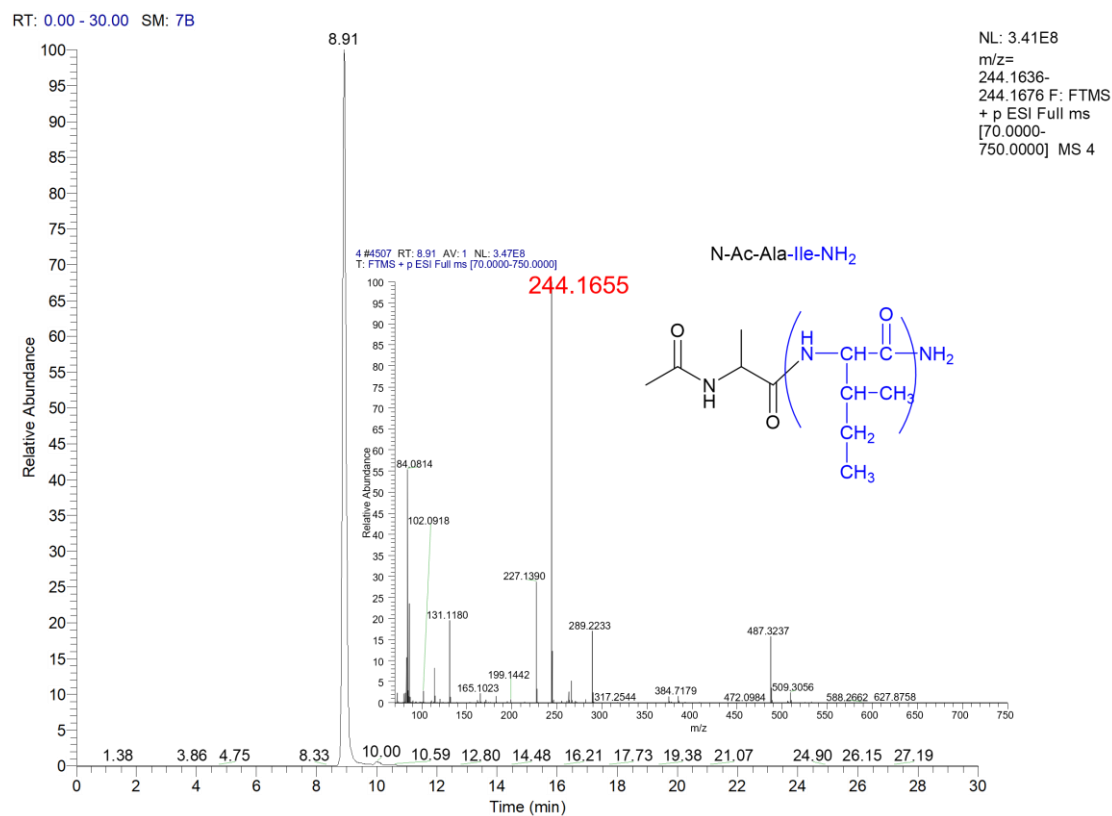

Fig. S49 Extraction ion chromatography-mass spectrometry analysis of the product. The EIC of m/z 244.1655 was analyzed, and its EIC corresponded to the dimer N-Ac-Ala-Ile-NH<sub>2</sub> with a retention time of 8.91 min.



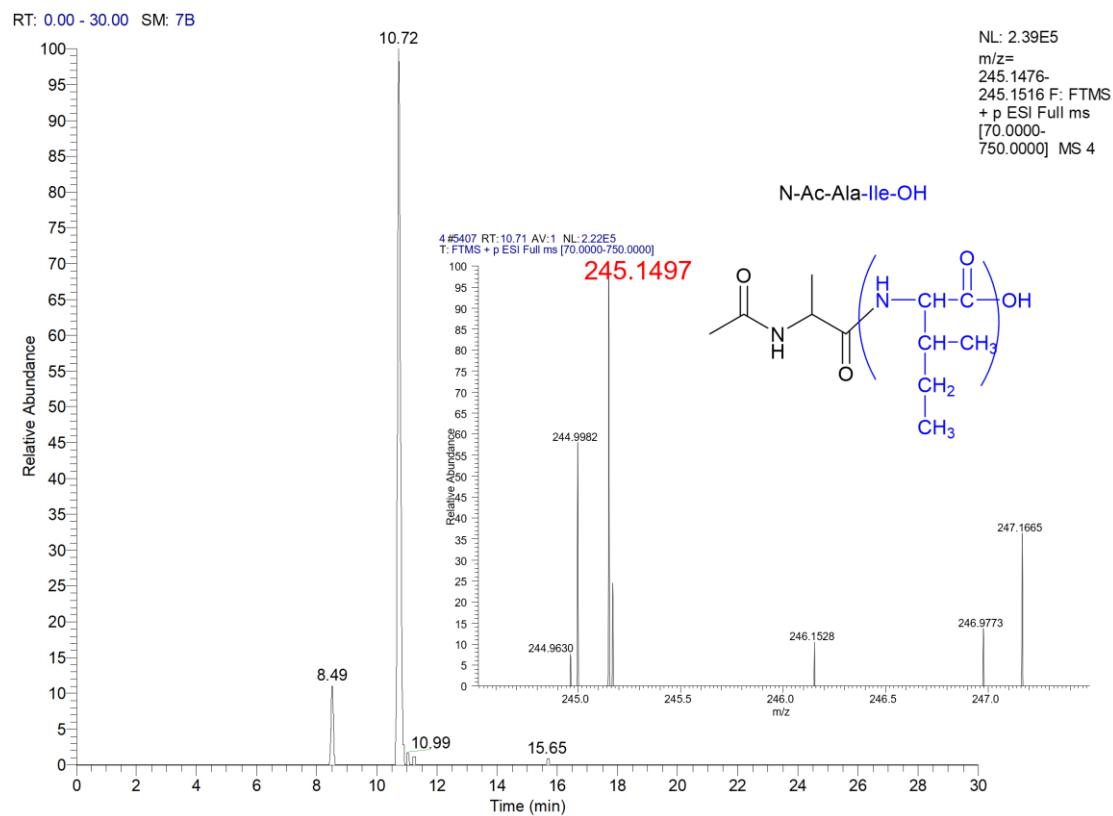

Fig. S50 Extraction ion chromatography-mass spectrometry analysis of the product. The EIC of  $m/z$  245.1497 was analyzed, and its EIC corresponded to the dipeptide N-Ac-Ala-Ile-OH with a retention time of 10.72 min.

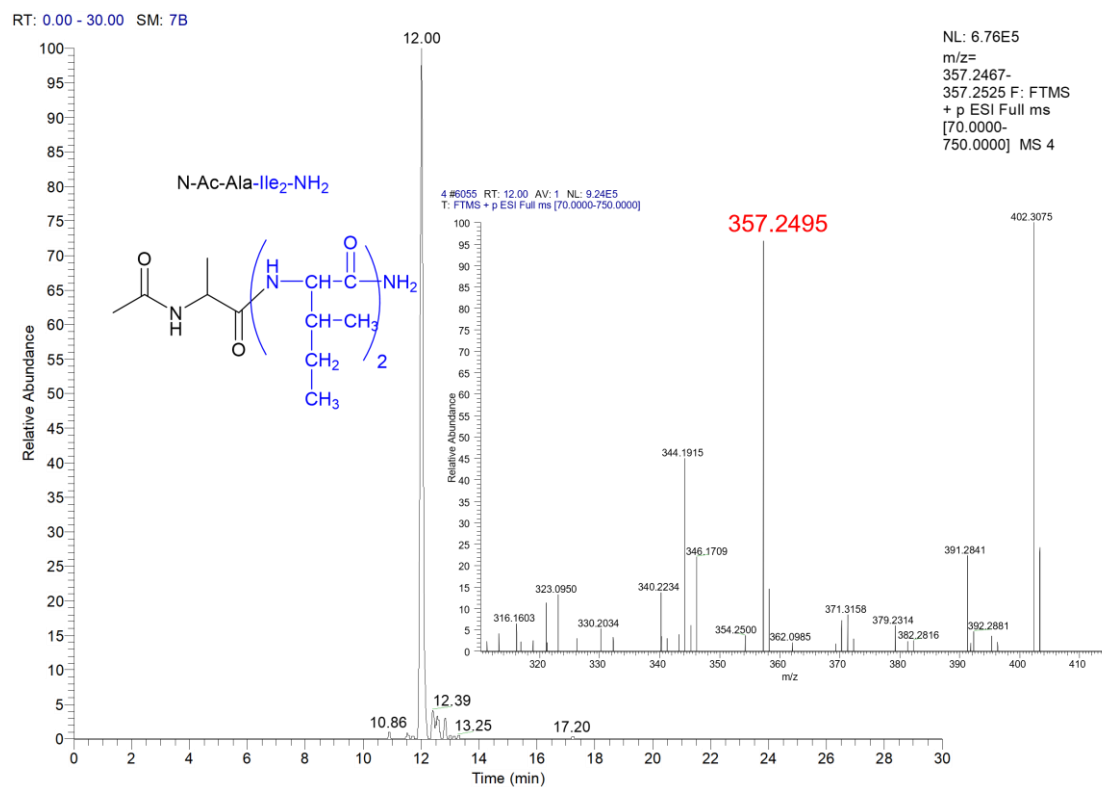

Fig. S51 Extraction ion chromatography-mass spectrometry analysis of the product. The EIC of m/z 357.2495 was analyzed and its EIC corresponds to the trimer N-Ac-Ala-Ile<sub>2</sub>-NH<sub>2</sub> with a retention time of 12.00 min.

2.13 Oligomer produced by the polymerization of 0.1 M Ac-Ala-NH<sub>2</sub> and 0.1 M Met-NH<sub>2</sub>. (Figs. S52-S58)

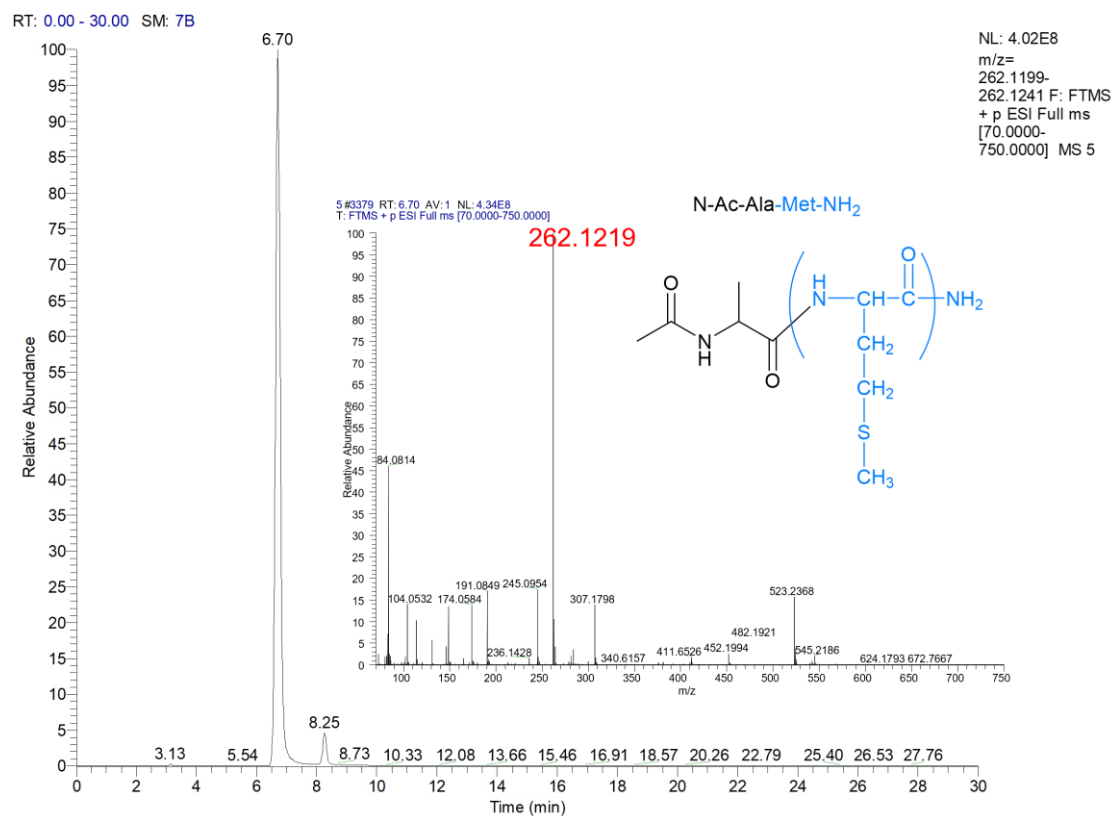

Fig. S52 Extraction ion chromatography-mass spectrometry analysis of the product. The EIC of  $m/z$  262.1219 was analyzed and its EIC corresponded to the dimer N-Ac-Ala-Met-NH<sub>2</sub> with a retention time of 6.70 min.

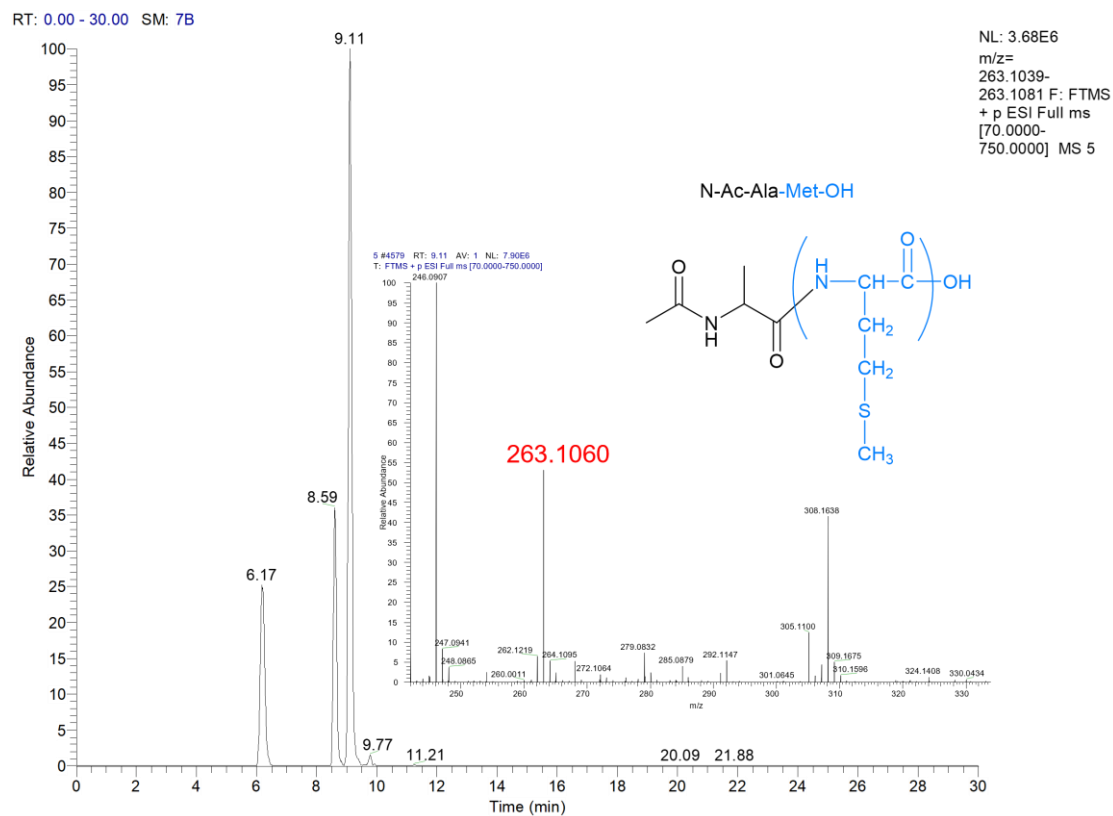

Fig. S53 Extraction ion chromatography-mass spectrometry analysis of the product. The EIC of  $m/z$  263.1060 was analyzed and its EIC corresponded to the dipeptide N-Ac-Ala-Met-OH with a retention time of 9.11 min.

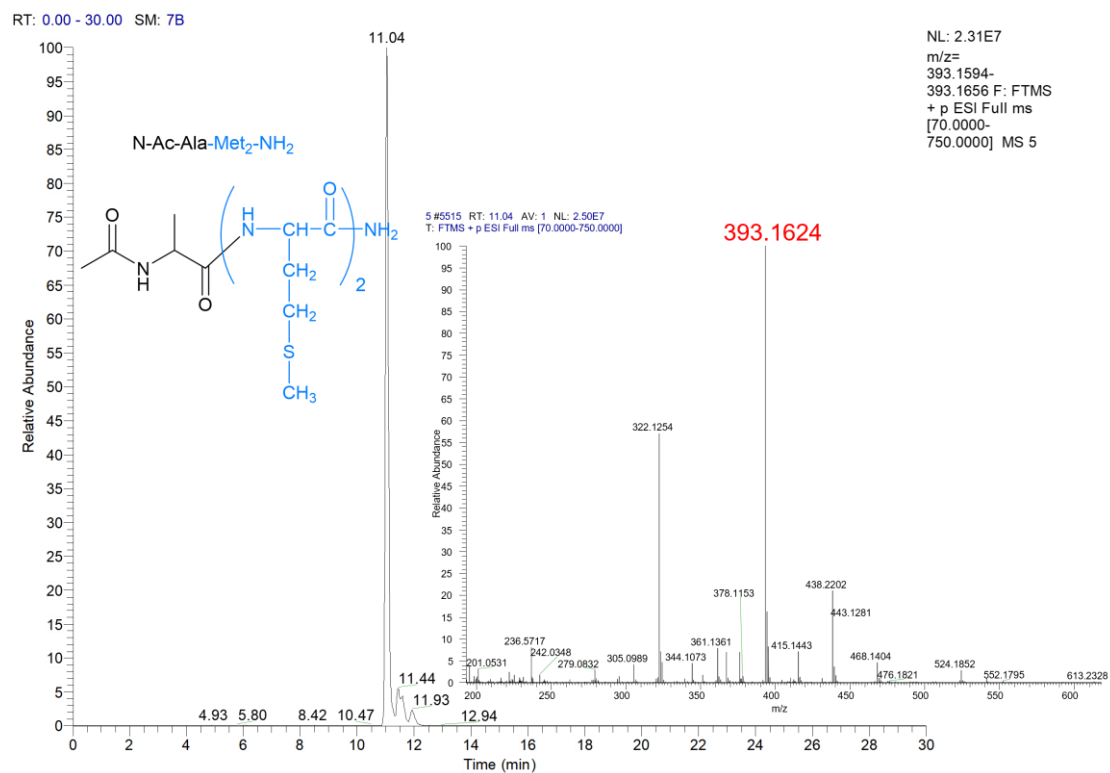

Fig. S54 Extraction ion chromatography-mass spectrometry analysis of the product. The EIC of  $m/z$  393.1624 was analyzed, and its EIC corresponds to the trimer N-Ac-Ala-Met<sub>2</sub>-NH<sub>2</sub> with a retention time of 11.04 min.

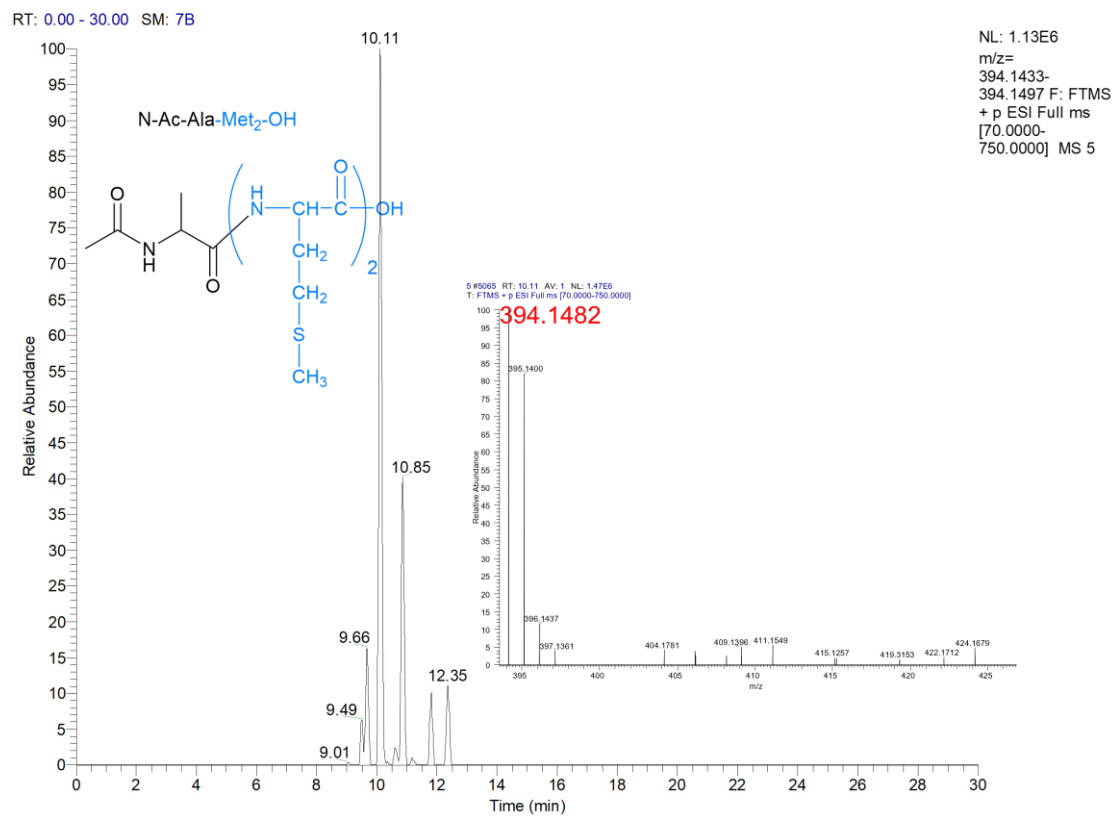

Fig. S55 Extraction ion chromatography-mass spectrometry analysis of the product. The EIC of  $m/z$  394.1482 was analyzed and its EIC corresponded to the tripeptide N-Ac-Ala-Met<sub>2</sub>-OH with a retention time of 10.11 min.

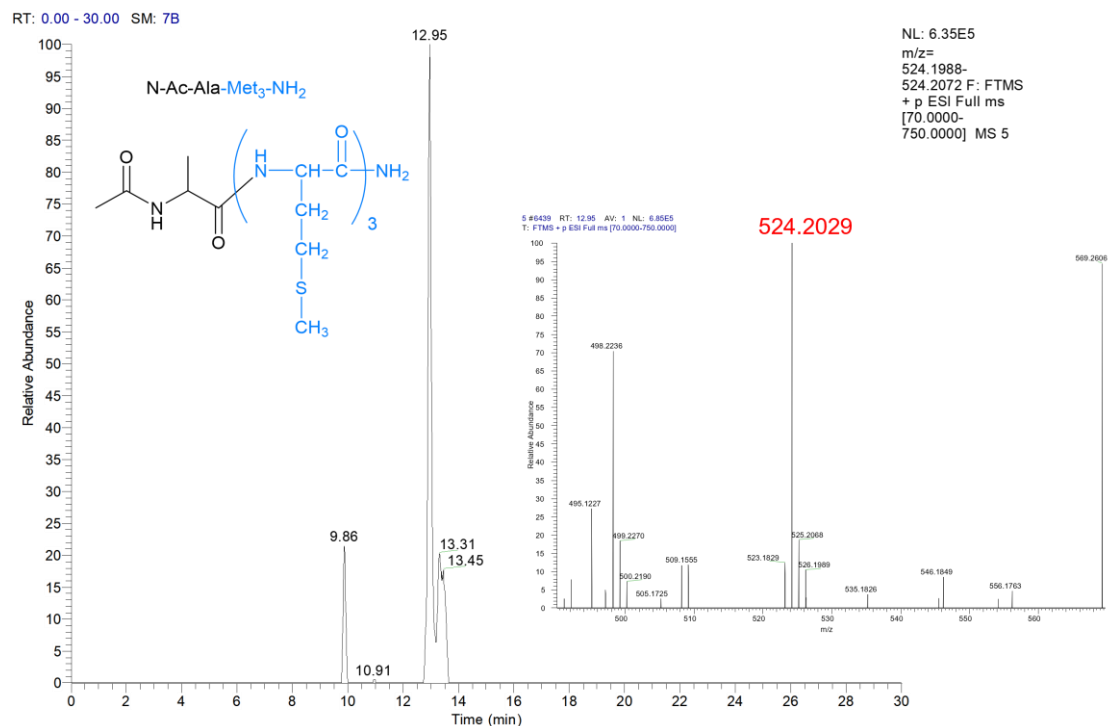

Fig. S56 Extraction ion chromatography-mass spectrometry analysis of the product. The EIC of  $m/z$  524.2029 was analyzed, and its EIC corresponds to the tetramer N-Ac-Ala-Met<sub>3</sub>-NH<sub>2</sub> with a retention time of 12.95 min.

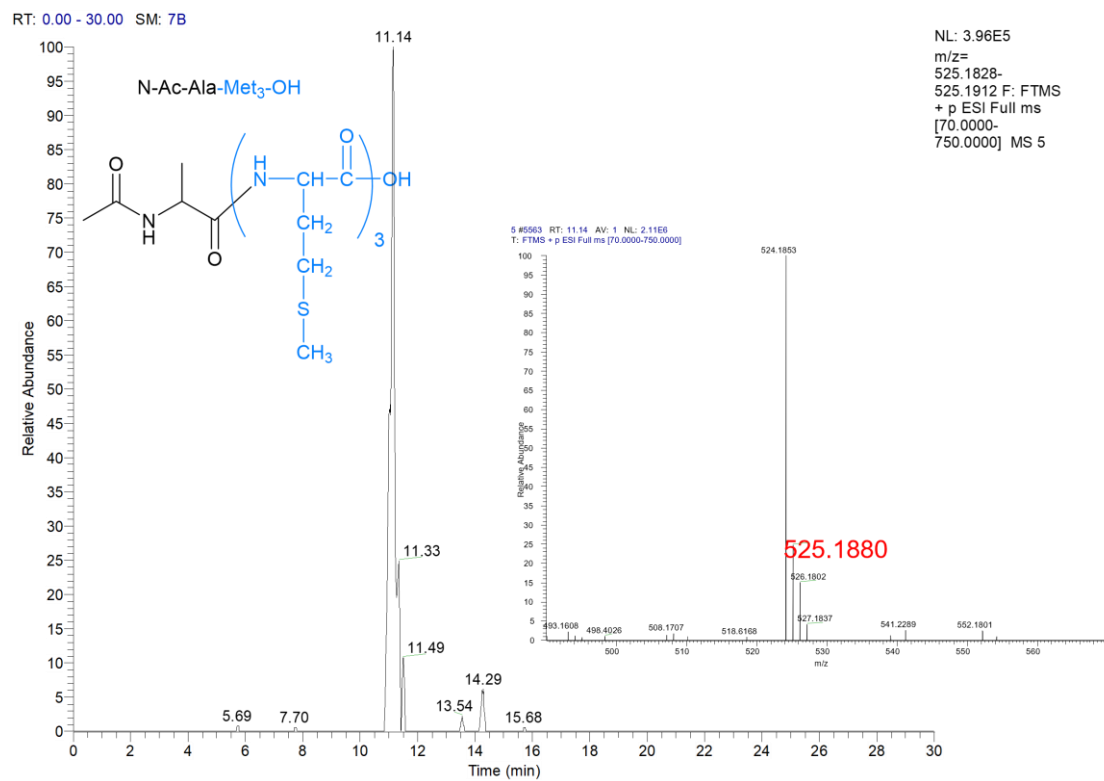

Fig. S57 Extraction ion chromatography-mass spectrometry analysis of the product. The EIC of m/z 525.1880 was analyzed and its EIC corresponded to the tetrapeptide N-Ac-Ala-Met<sub>3</sub>-OH with a retention time of 11.14 min.



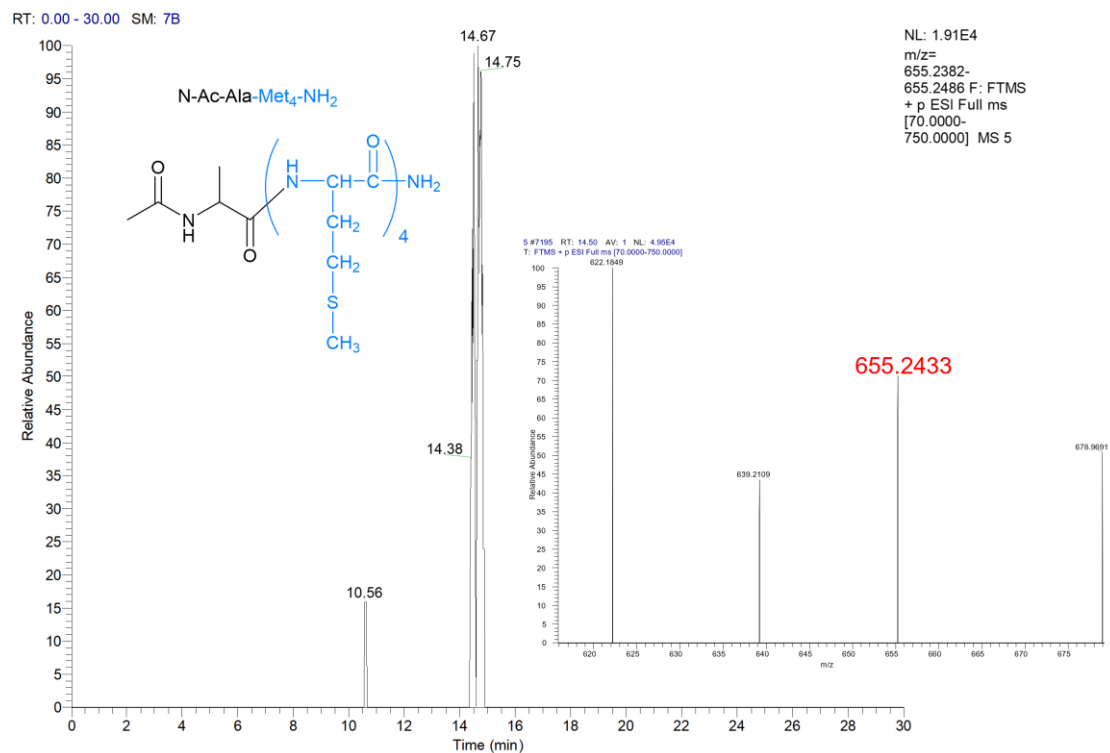

Fig. S58 Extraction ion chromatography-mass spectrometry analysis of the product. The EIC of m/z 655.2433 was analyzed, and its EIC corresponds to the pentamer N-Ac-Ala-Met<sub>4</sub>-NH<sub>2</sub> with a retention time of 14.50 min.

2.14 Oligomer produced by the polymerization of 0.1 M Ac-Ala-NH<sub>2</sub> and 0.1 M Thr-NH<sub>2</sub>. (Figs. S59-S63)

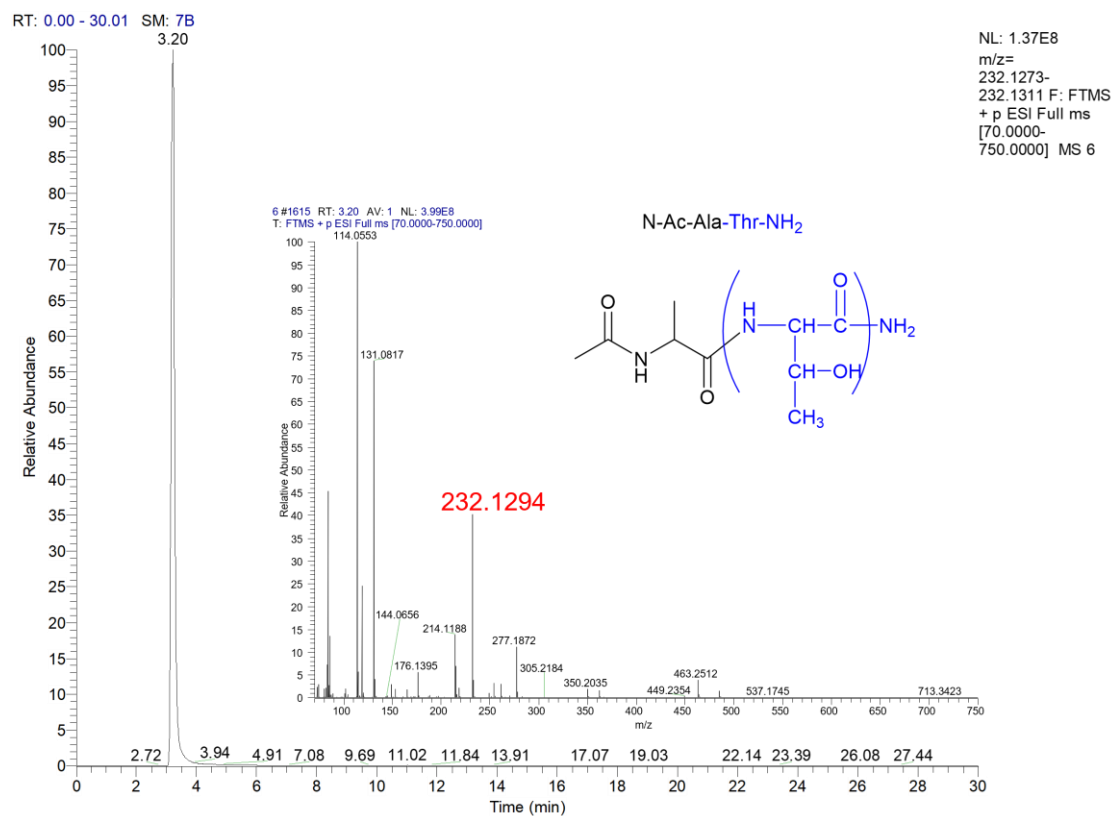

Fig. S59 Extraction ion chromatography-mass spectrometry analysis of the product. The EIC of m/z 232.1294 was analyzed and its EIC corresponded to the dimer N-Ac-Ala-Thr-NH<sub>2</sub> with a retention time of 3.20 min.

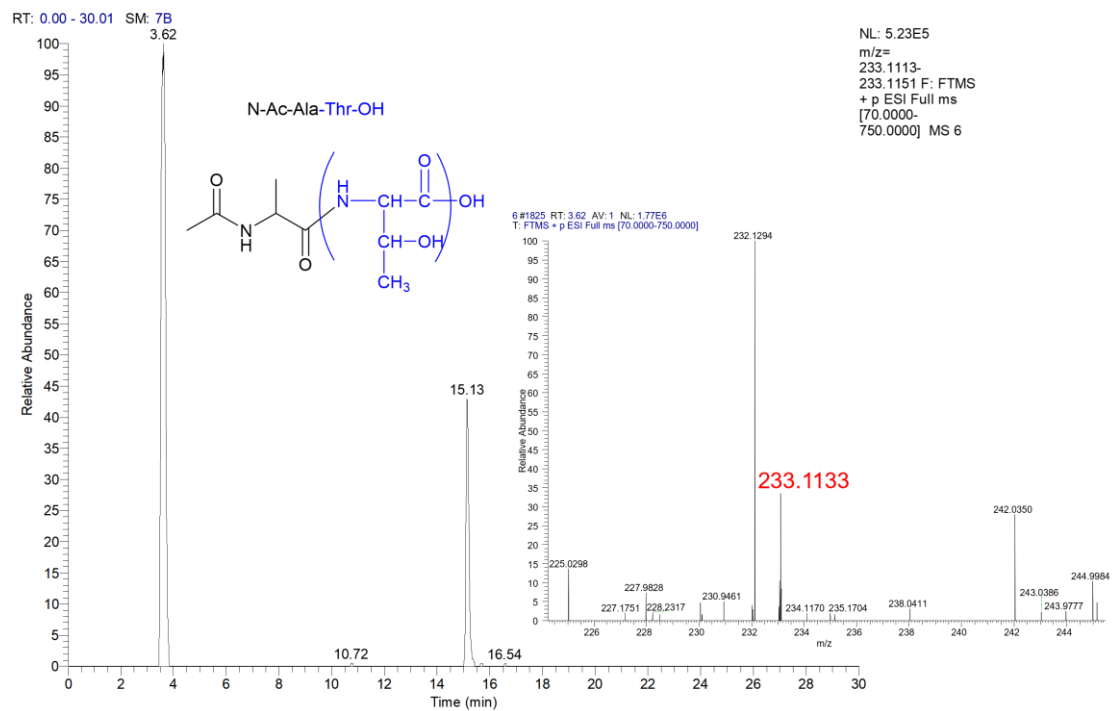

Fig. S60 Extraction ion chromatography-mass spectrometry analysis of the product. The EIC of  $m/z$  233.1133 was analyzed and its EIC corresponded to the dipeptide N-Ac-Ala-Thr-OH with a retention time of 3.62 min.

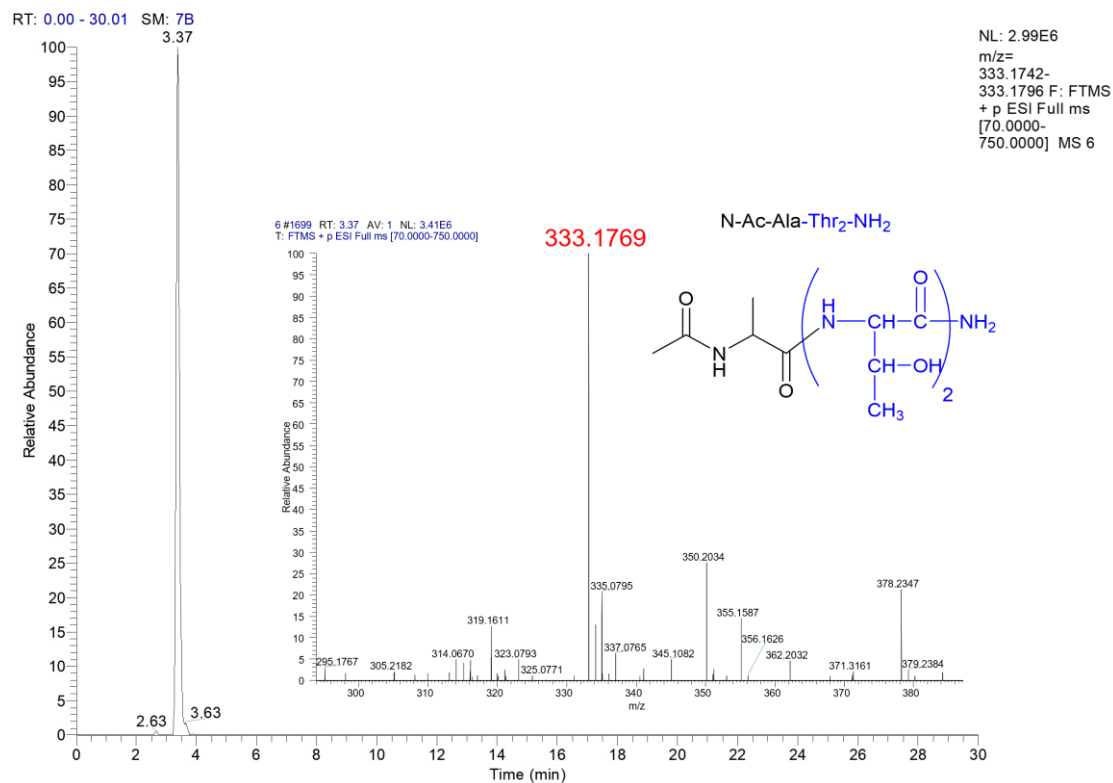

Fig. S61 Extraction ion chromatography-mass spectrometry analysis of the product. The EIC of  $m/z$  333.1769 was analyzed and its EIC corresponded to the trimer N-Ac-Ala-Thr<sub>2</sub>-NH<sub>2</sub> with a retention time of 3.37 min.

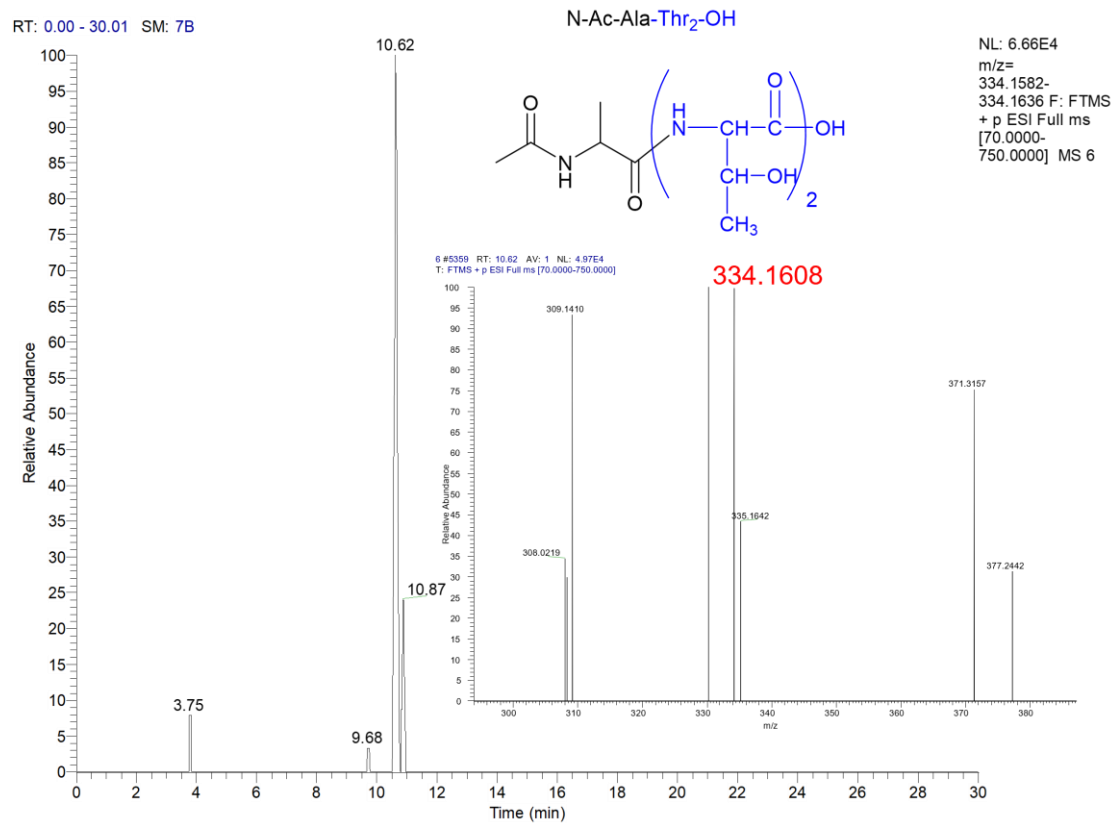

Fig. S62 Extraction ion chromatography-mass spectrometry analysis of the product. The EIC of m/z 334.1608 was analyzed and its EIC corresponded to the tripeptide N-Ac-Ala-Thr<sub>2</sub>-OH with a retention time of 10.62 min.

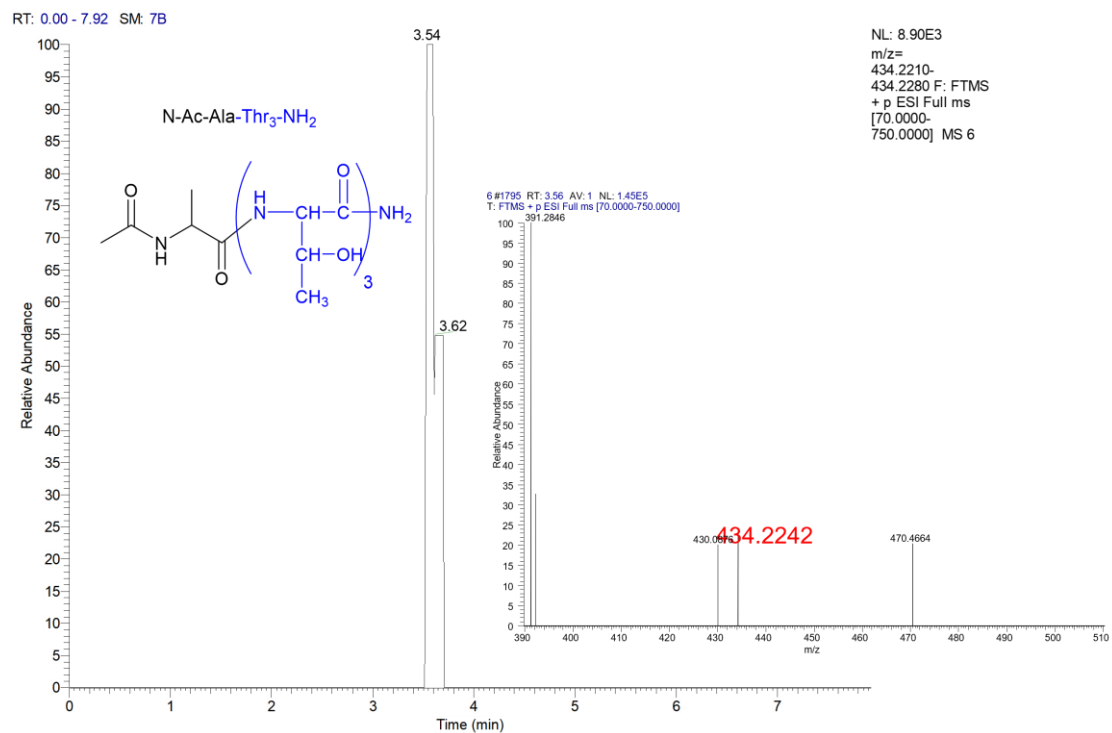

Fig. S63 Extraction ion chromatography-mass spectrometry analysis of the product. The EIC of  $m/z$  434.2242 was analyzed and its EIC corresponded to the tetramer N-Ac-Ala-Thr<sub>3</sub>-NH<sub>2</sub> with a retention time of 3.55 min.

2.15 Oligomer produced by the polymerization of 0.1 M Ac-Ala-NH<sub>2</sub> and 0.1 M Thr-NH<sub>2</sub>. (Figs. S64-S68)

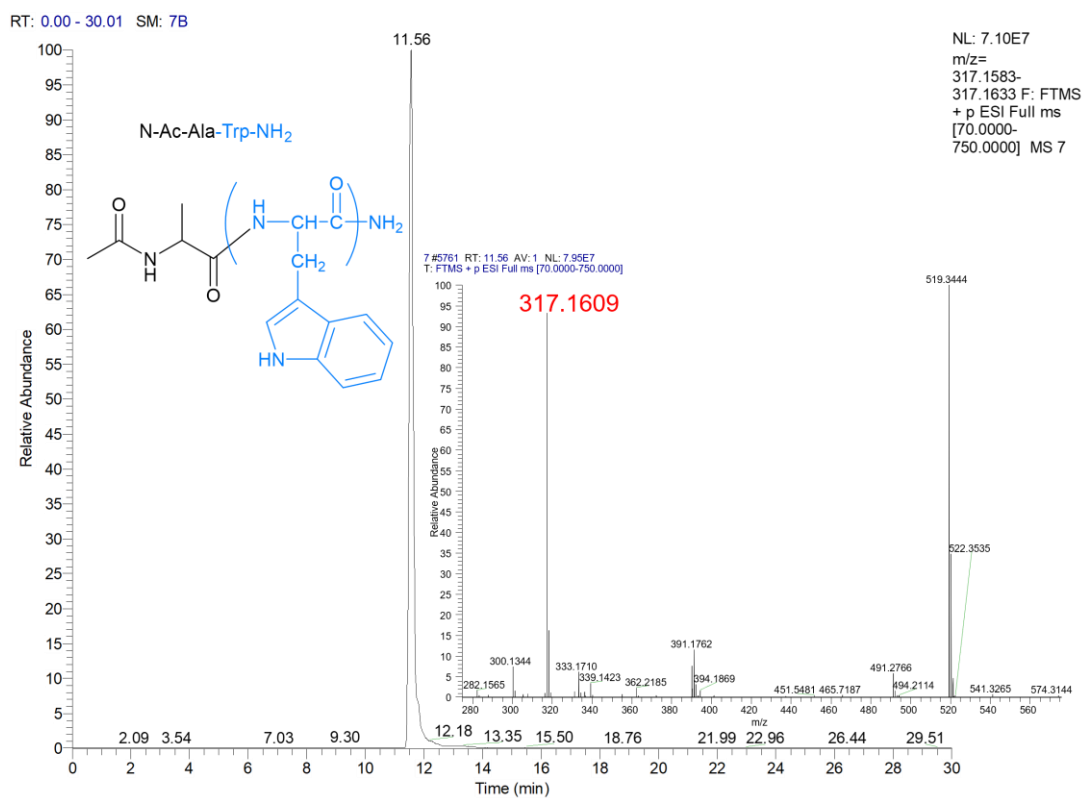

Fig. S64 Extraction ion chromatography-mass spectrometry analysis of the product. The EIC of  $m/z$  317.1609 was analyzed and its EIC corresponded to the dimer N-Ac-Ala-Trp-NH<sub>2</sub> with a retention time of 11.56 min.

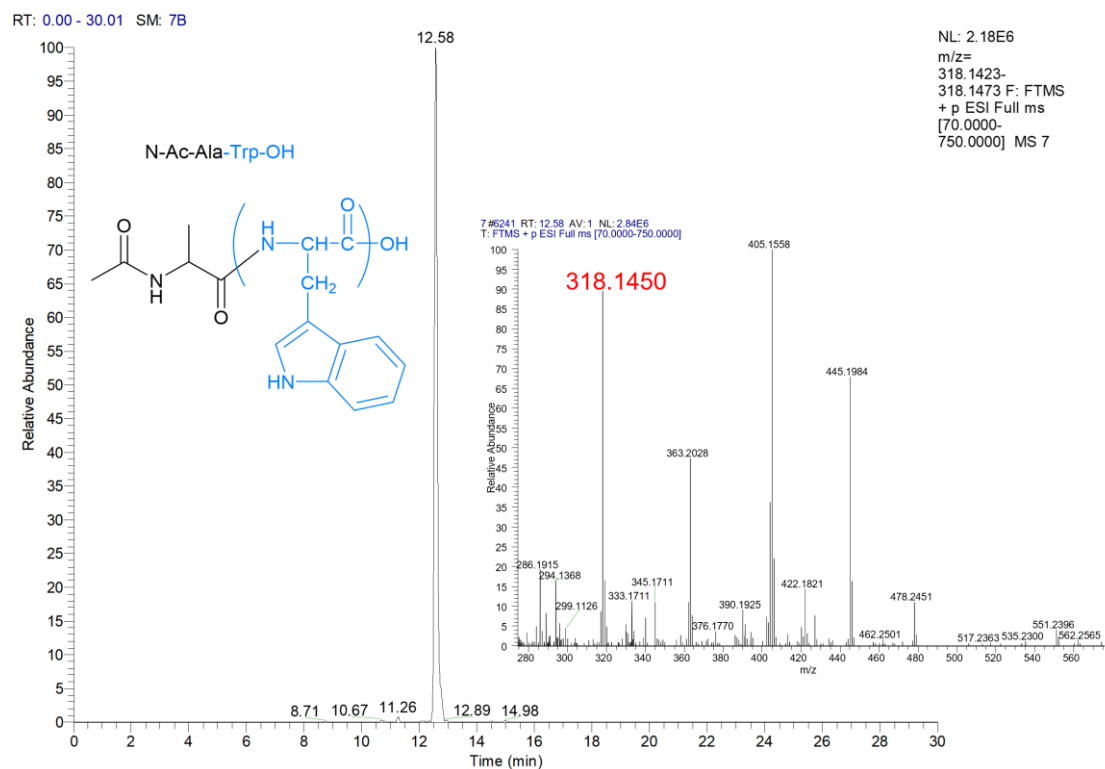

Fig. S65 Extraction ion chromatography-mass spectrometry analysis of the product. The EIC of m/z 318.1450 was analyzed and its EIC corresponded to the dipeptide N-Ac-Ala-Trp-OH with a retention time of 12.58 min.



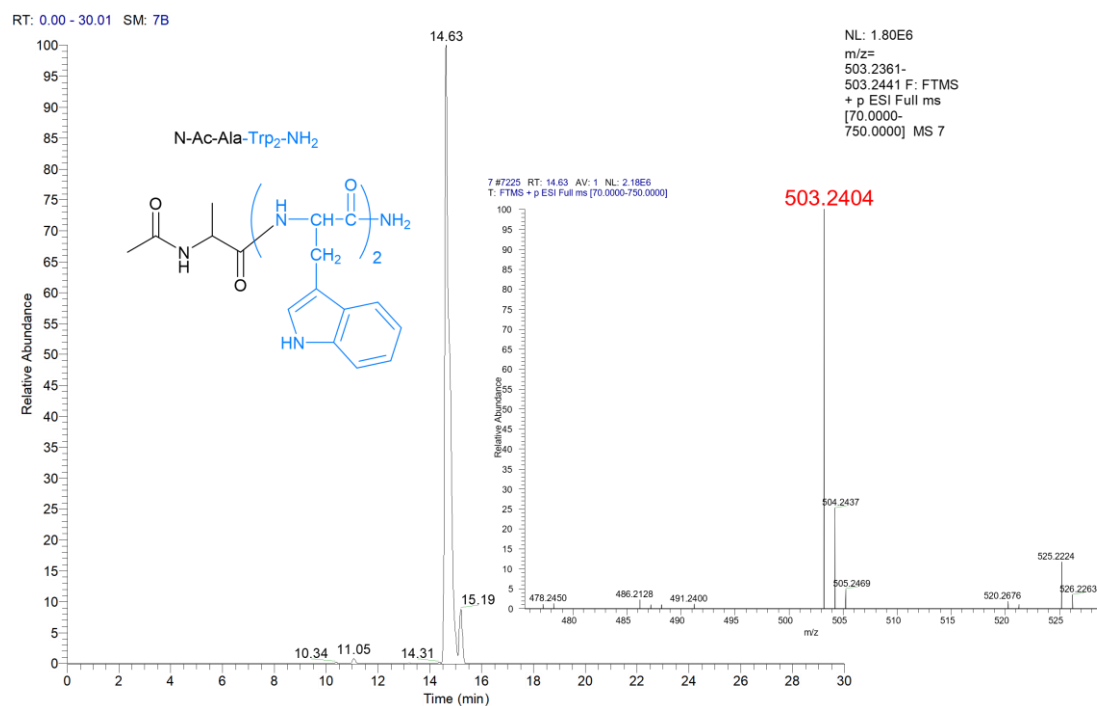

Fig. S66 Extraction ion chromatography-mass spectrometry analysis of the product. The EIC of  $m/z$  503.2404 was analyzed and its EIC corresponded to the trimer N-Ac-Ala-Trp<sub>2</sub>-NH<sub>2</sub> with a retention time of 14.63 min.

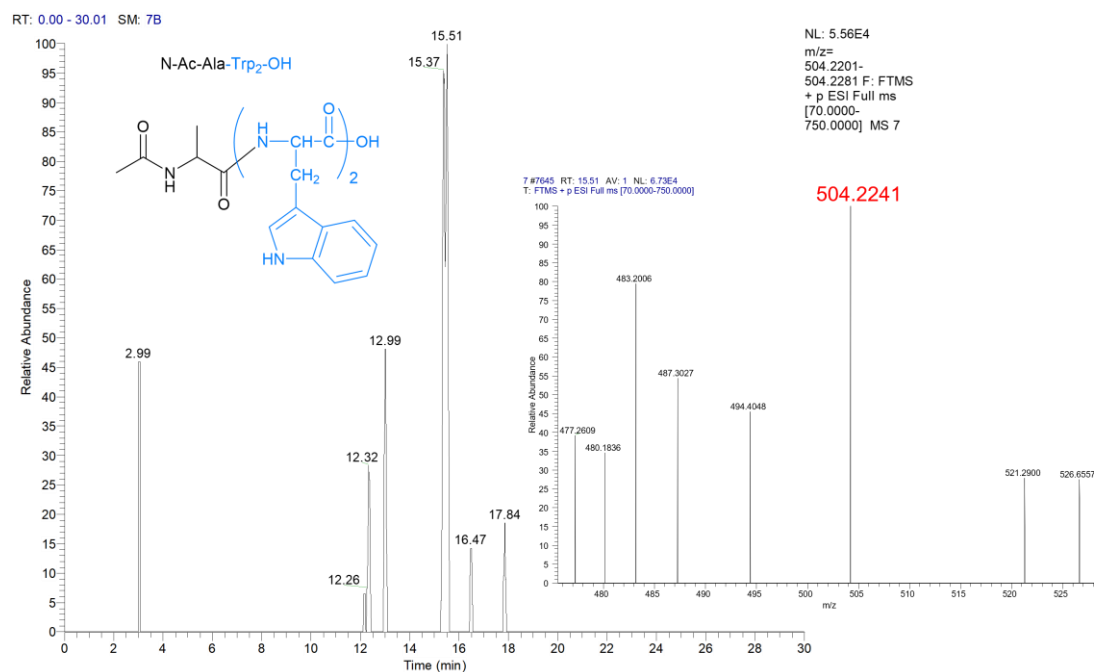

Fig. S67 Extraction ion chromatography-mass spectrometry analysis of the product. The EIC of  $m/z$  504.2241 was analyzed and its EIC corresponded to the tripeptide N-Ac-Ala-Trp<sub>2</sub>-OH with a retention time of 15.51 min.

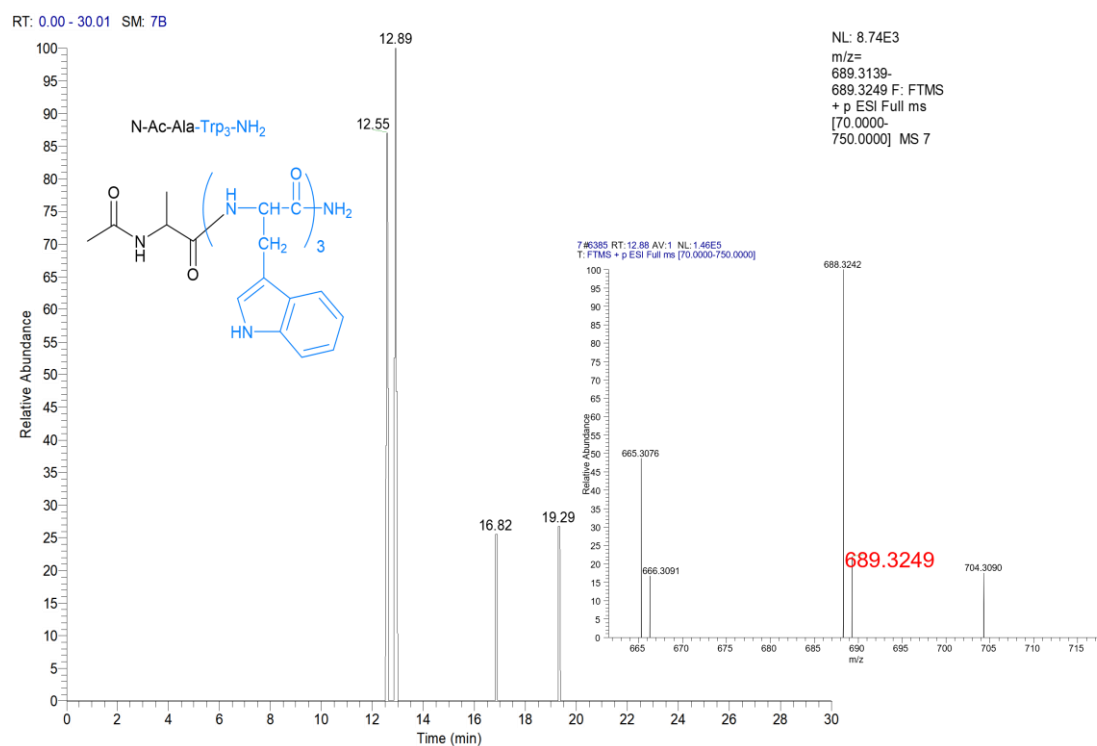

Fig. S68 Extraction ion chromatography-mass spectrometry analysis of the product. The EIC of  $m/z$  689.3249 was analyzed and its EIC corresponded to the tetramer N-Ac-Ala-Trp<sub>3</sub>-NH<sub>2</sub> with a retention time of 12.89 min.

2.16 Oligomer produced by the polymerization of 0.1 M Ac-Ala-NH<sub>2</sub> and 0.1 M Thr-NH<sub>2</sub>. (Figs. S69-S72)

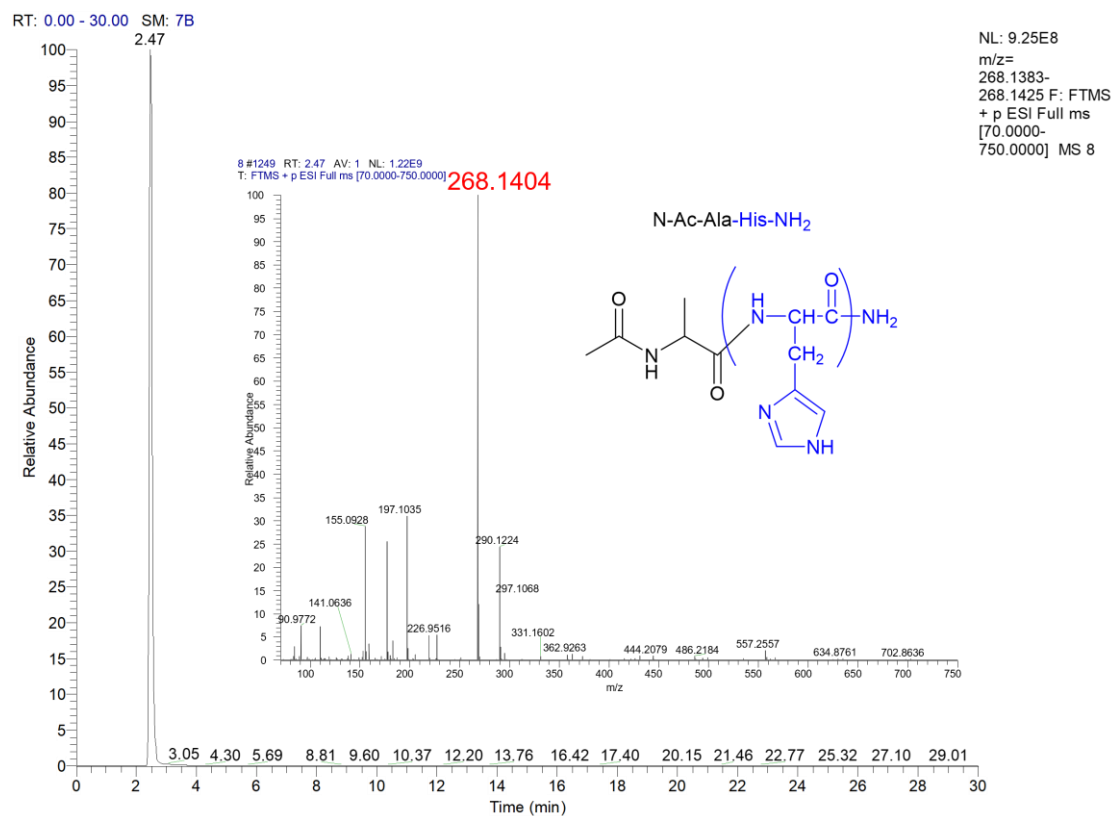

Fig. S69 Extraction ion chromatography-mass spectrometry analysis of the product. The EIC of m/z 268.1404 was analyzed and its EIC corresponded to the dimer N-Ac-Ala-His NH<sub>2</sub> with a retention time of 2.47 min.

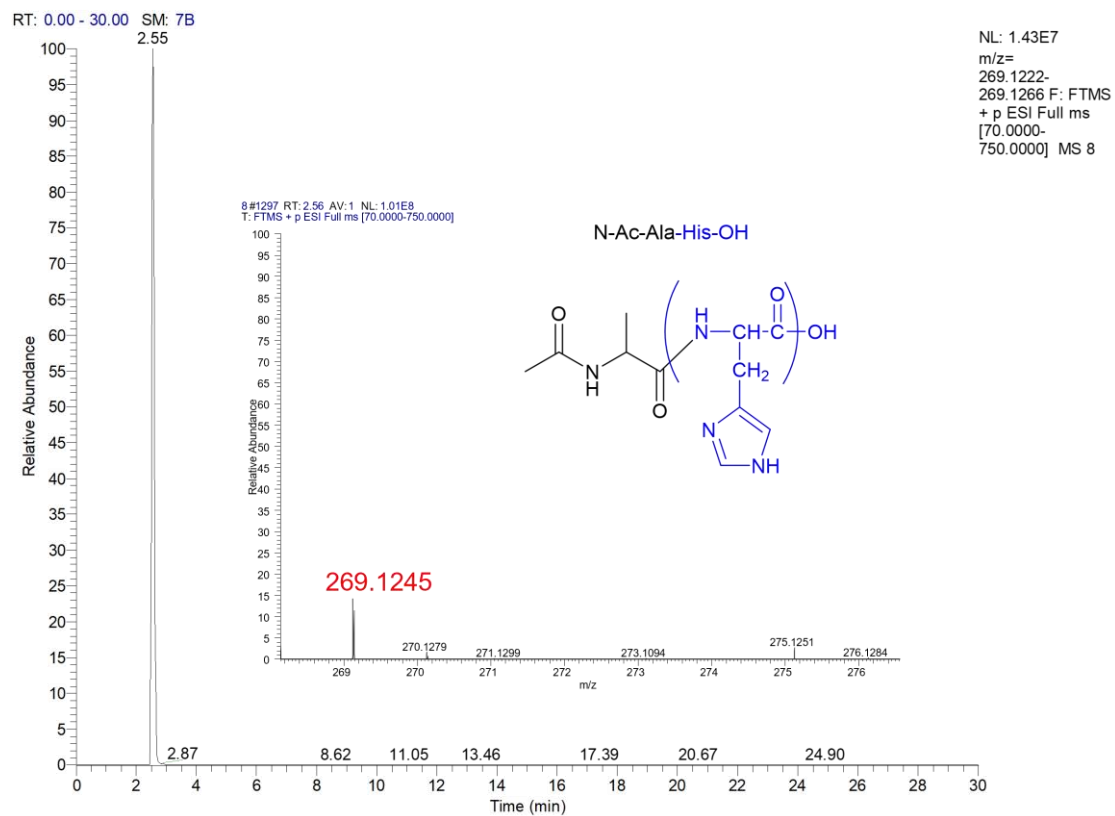

Fig. S70 Extraction ion chromatography-mass spectrometry analysis of the product. The EIC of m/z 269.1245 was analyzed and its EIC corresponded to the dipeptide N-Ac-Ala-His-OH with a retention time of 2.55 min.

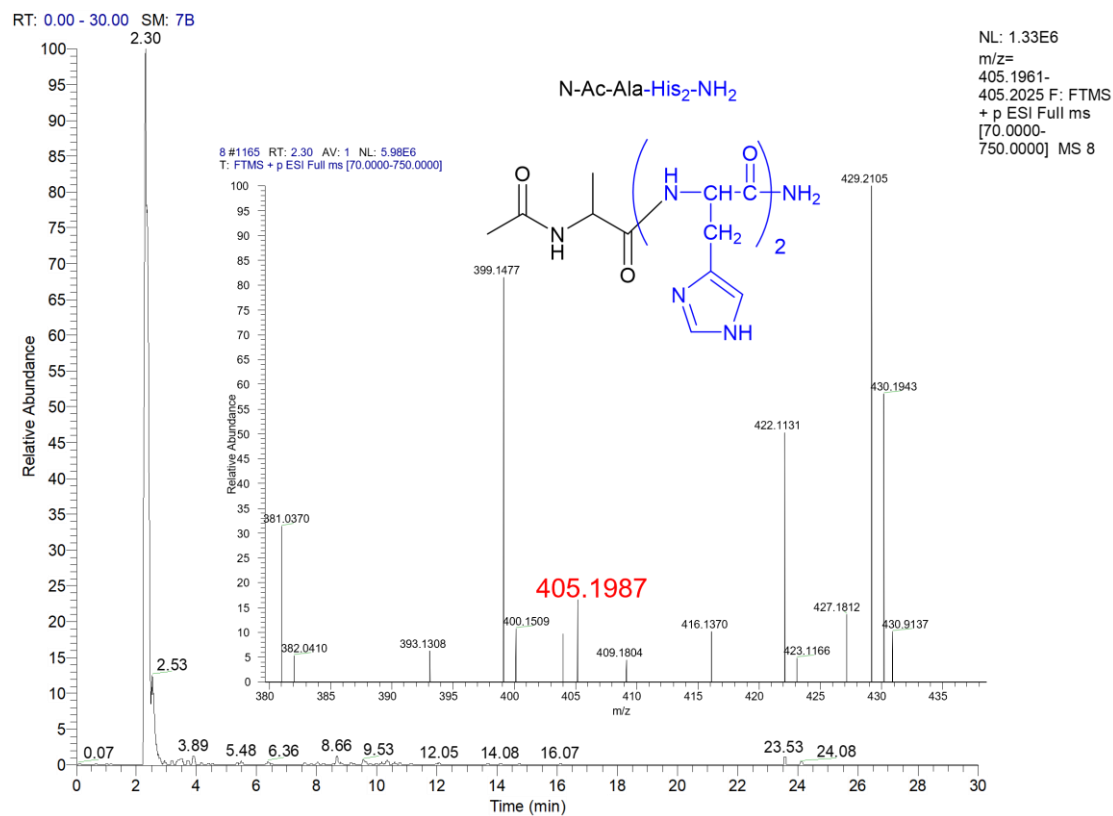

Fig. S71 Extraction ion chromatography-mass spectrometry analysis of the product. The EIC of  $m/z$  405.1987 was analyzed, and the EIC corresponds to the trimer N-Ac-Ala-His<sub>2</sub>-NH<sub>2</sub> with a retention time of 2.30 min.

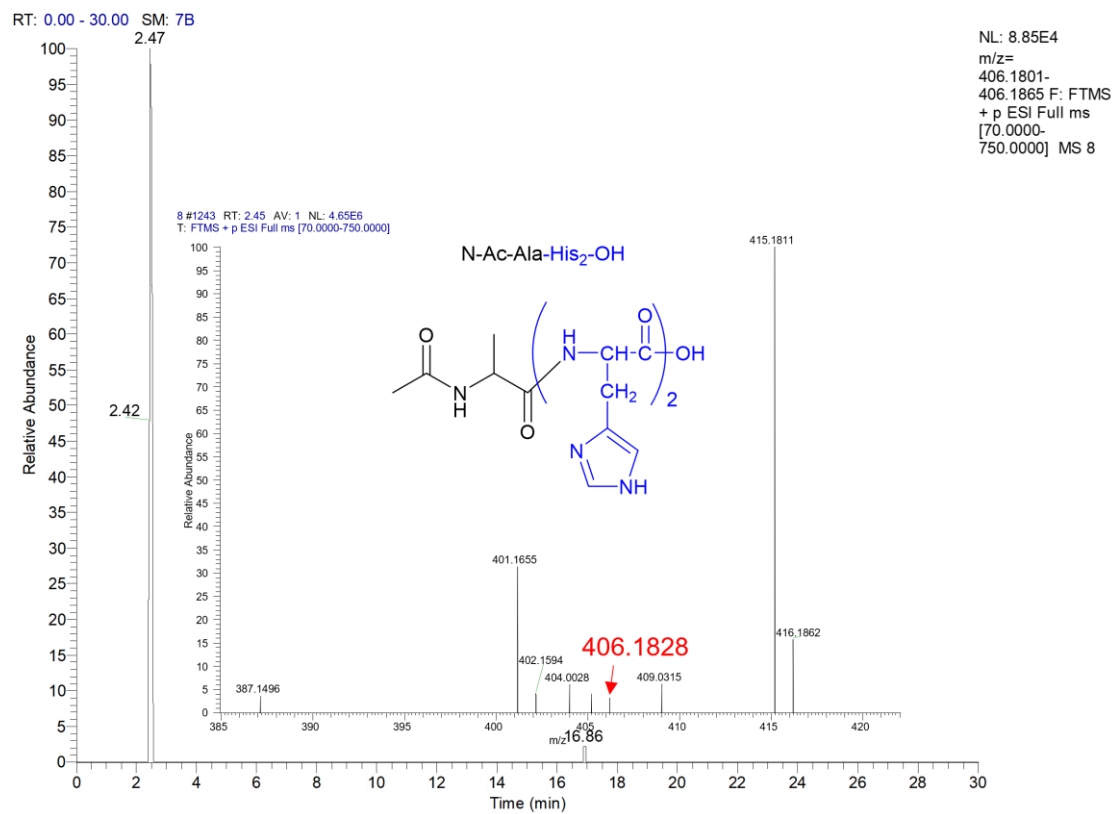

Fig. S72 Extraction ion chromatography-mass spectrometry analysis of the product. The EIC of m/z 406.1828 was analyzed and its EIC corresponded to the tripeptide N-Ac-Ala-His<sub>2</sub>-OH with a retention time of 2.45 min.

2.17 Oligomer produced by the polymerization of 0.1 M Ac-Ala-NH<sub>2</sub> and 0.1 M Asp-NH<sub>2</sub>. (Figs. S73-S78)

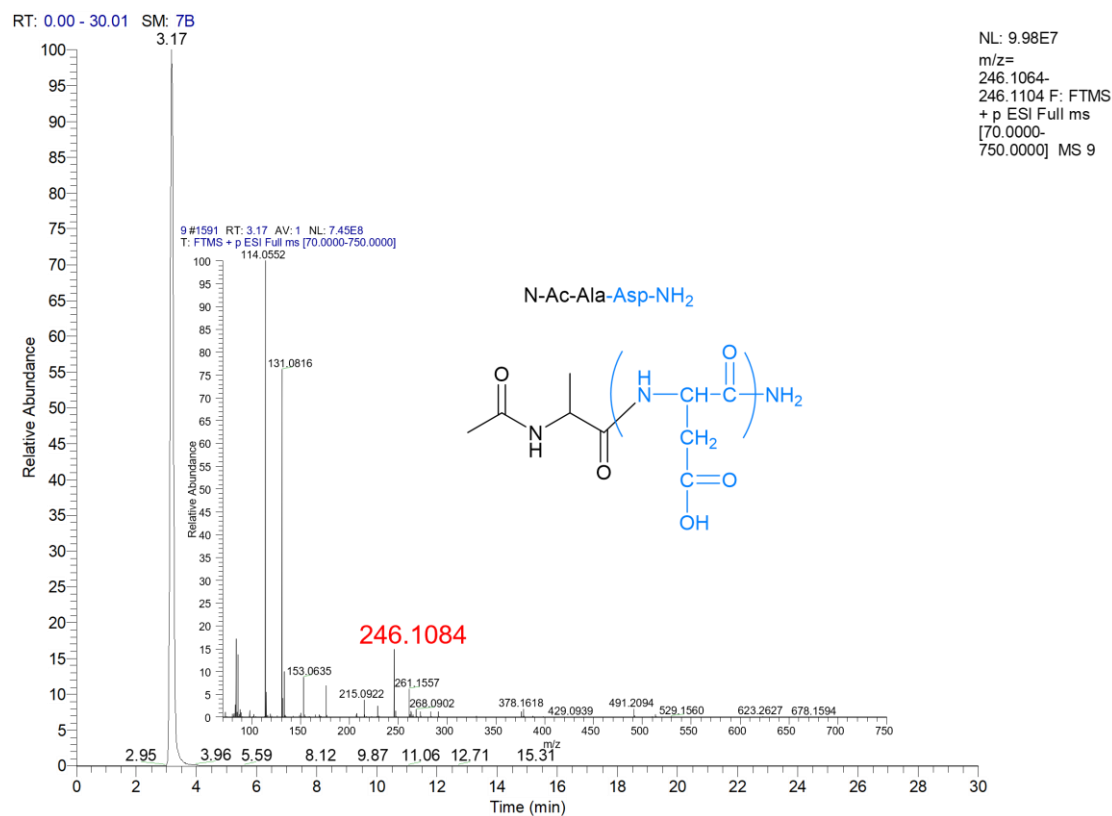

Fig. S73 Extraction ion chromatography-mass spectrometry analysis of the product. The EIC of m/z 246.1084 was analyzed, and its EIC corresponded to the dimer N-Ac-Ala-Asp-NH<sub>2</sub> with a retention time of 3.17 min.



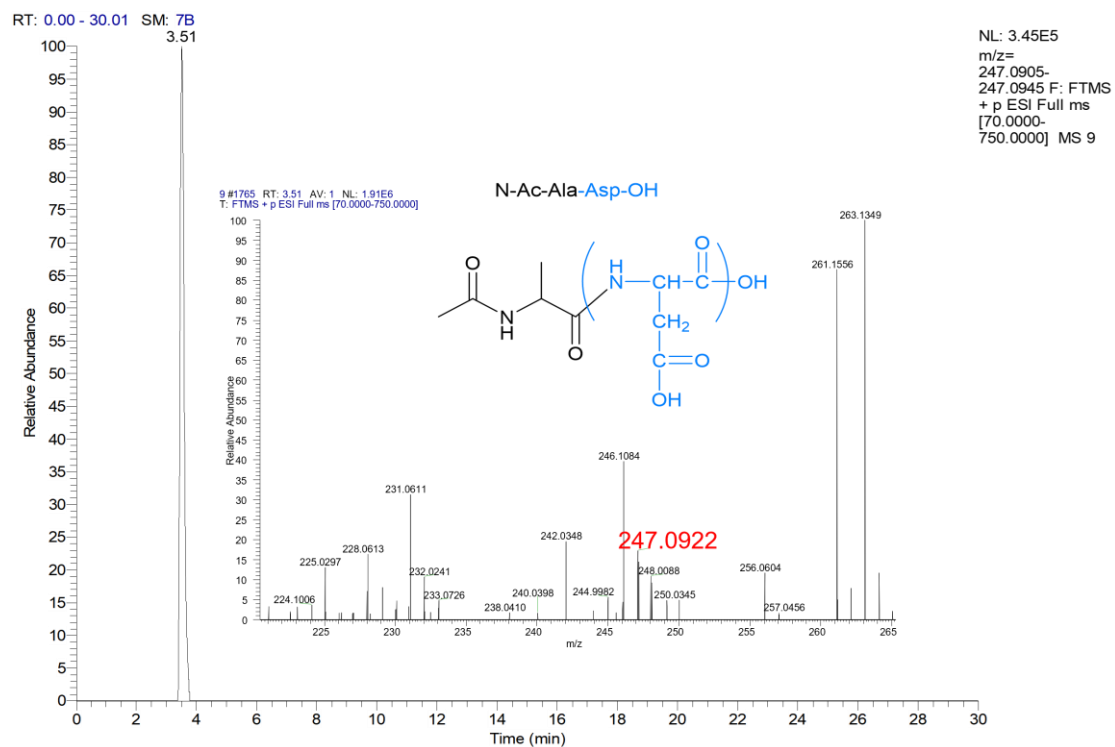

Fig. S74 Extraction ion chromatography-mass spectrometry analysis of the product. The EIC of m/z 247.0922 was analyzed, and its EIC corresponded to the dipeptide N-Ac-Ala-Asp-OH with a retention time of 3.51 min.

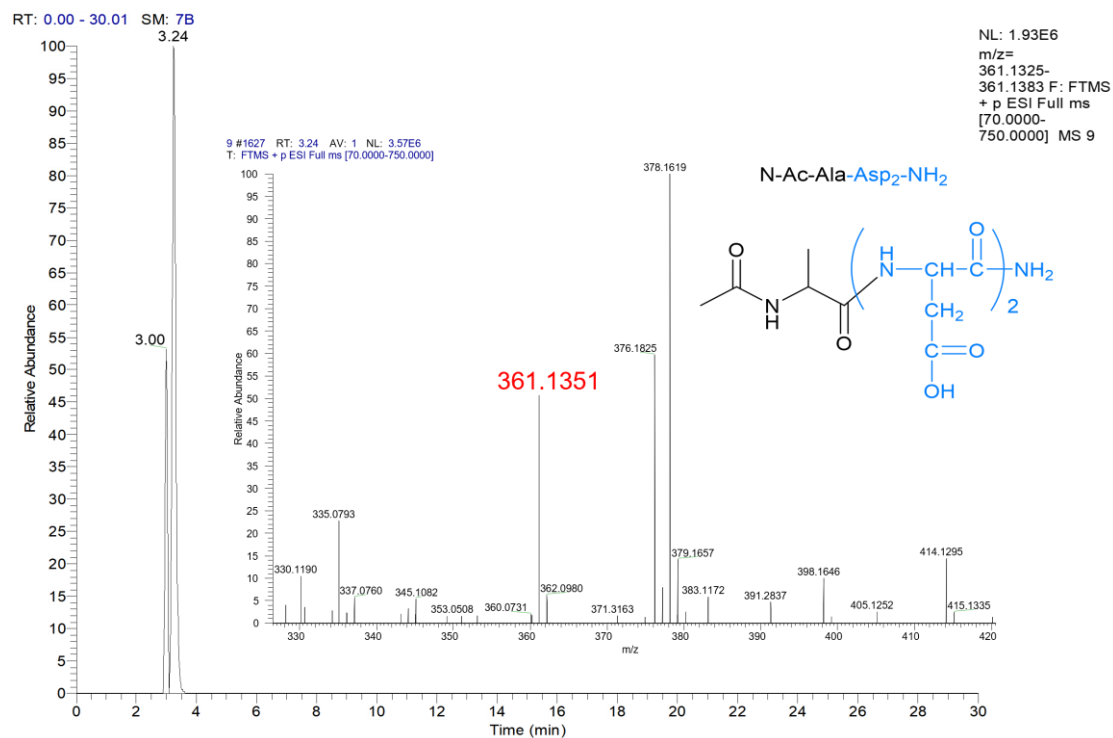

Fig. S75 Extraction ion chromatography-mass spectrometry analysis of the product. The EIC of m/z 361.1351 was analyzed, and its EIC corresponds to the trimer N-Ac-Ala-Asp<sub>2</sub>-NH<sub>2</sub> with a retention time of 3.24 min.

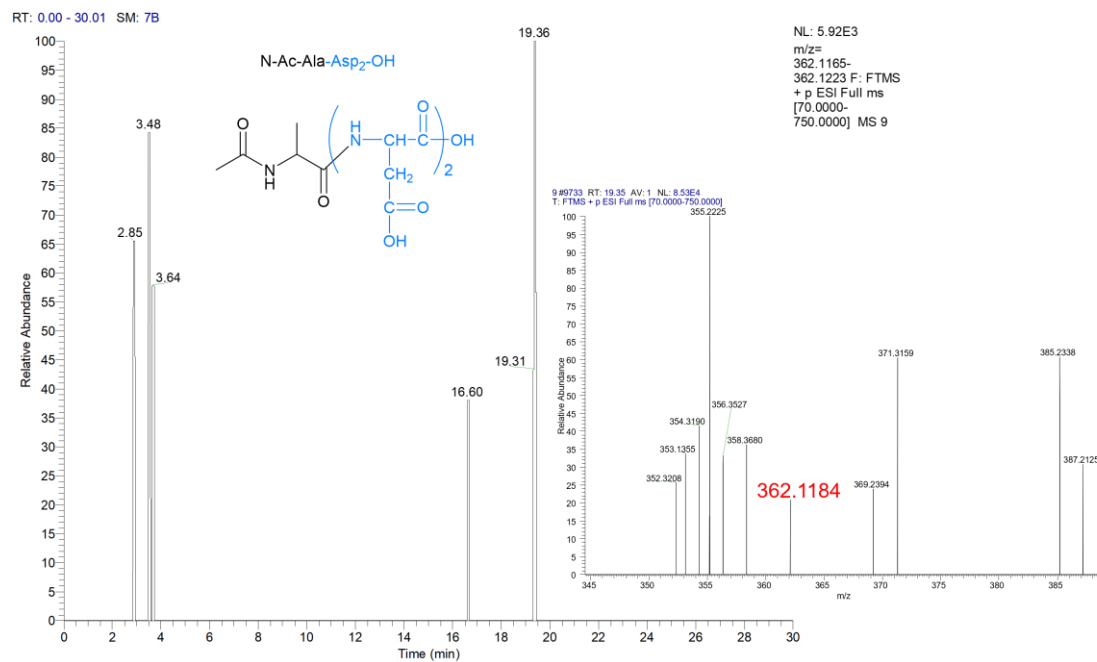

Fig. S76 Extraction ion chromatography-mass spectrometry analysis of the product. The EIC of  $m/z$  362.1184 was analyzed, and its EIC corresponded to the tripeptide N-Ac-Ala-Asp<sub>2</sub>-OH with a retention time of 19.35 min.

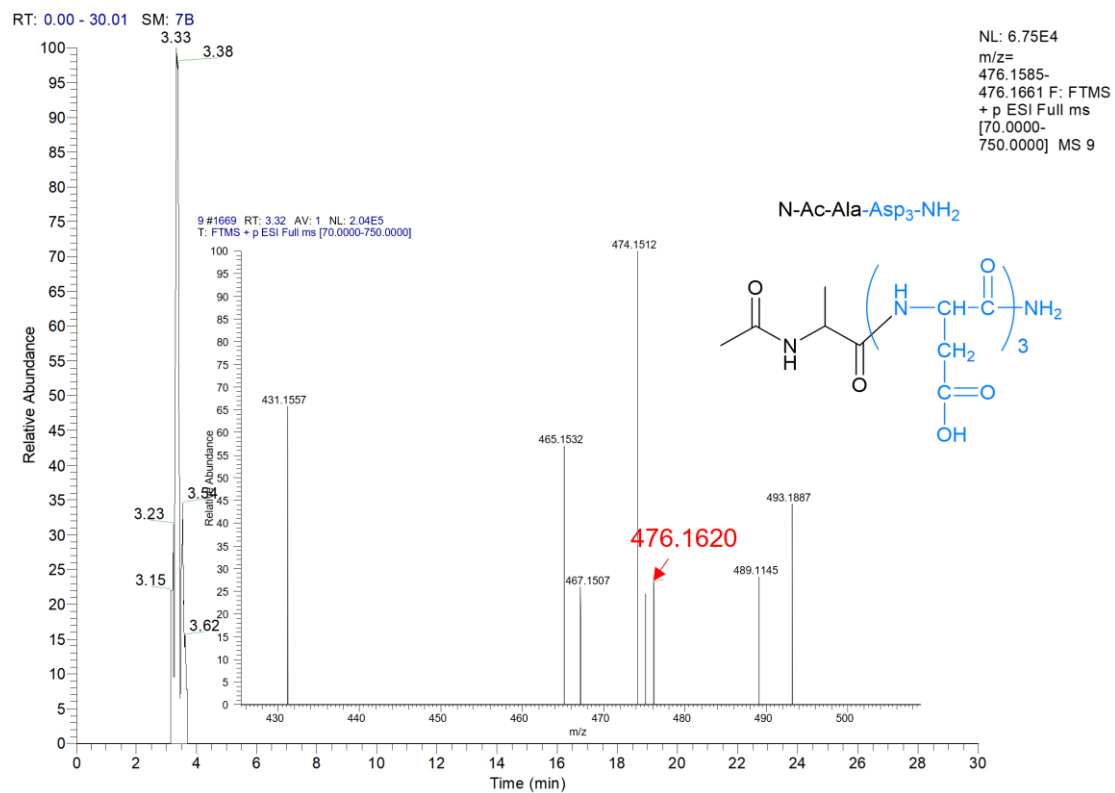

Fig. S77 Extraction ion chromatography-mass spectrometry analysis of the product. The EIC of m/z 476.1620 was analyzed and its EIC corresponded to the tetramer N-Ac-Ala-Asp<sub>3</sub>-NH<sub>2</sub> with a retention time of 3.32 min.

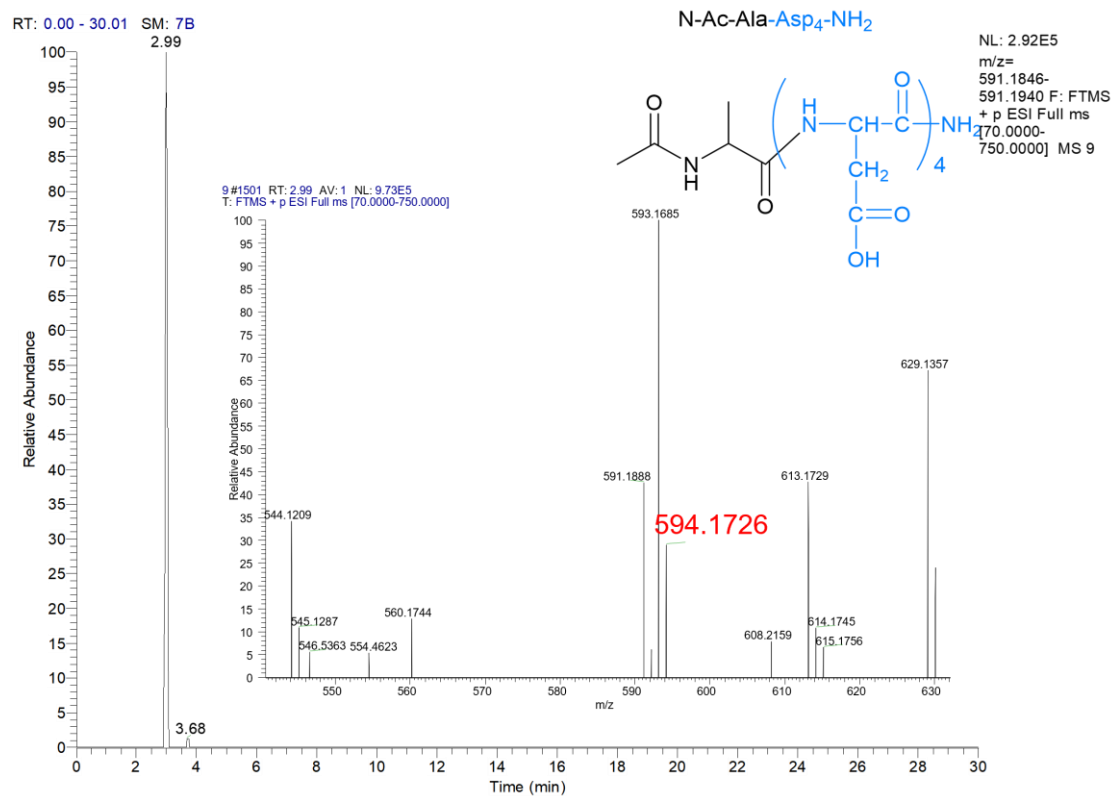

Fig. S78 Extraction ion chromatography-mass spectrometry analysis of the product. The EIC of m/z 594.1726 was analyzed, and its EIC corresponded to the pentamer N-Ac-Ala-Asp<sub>4</sub>-NH<sub>2</sub> with a retention time of 2.99 min.

2.18 Oligomer produced by the polymerization of 0.1M Ac-Ala-NH<sub>2</sub> and 0.1M Tyr-NH<sub>2</sub>. (Figs. S79-S81)

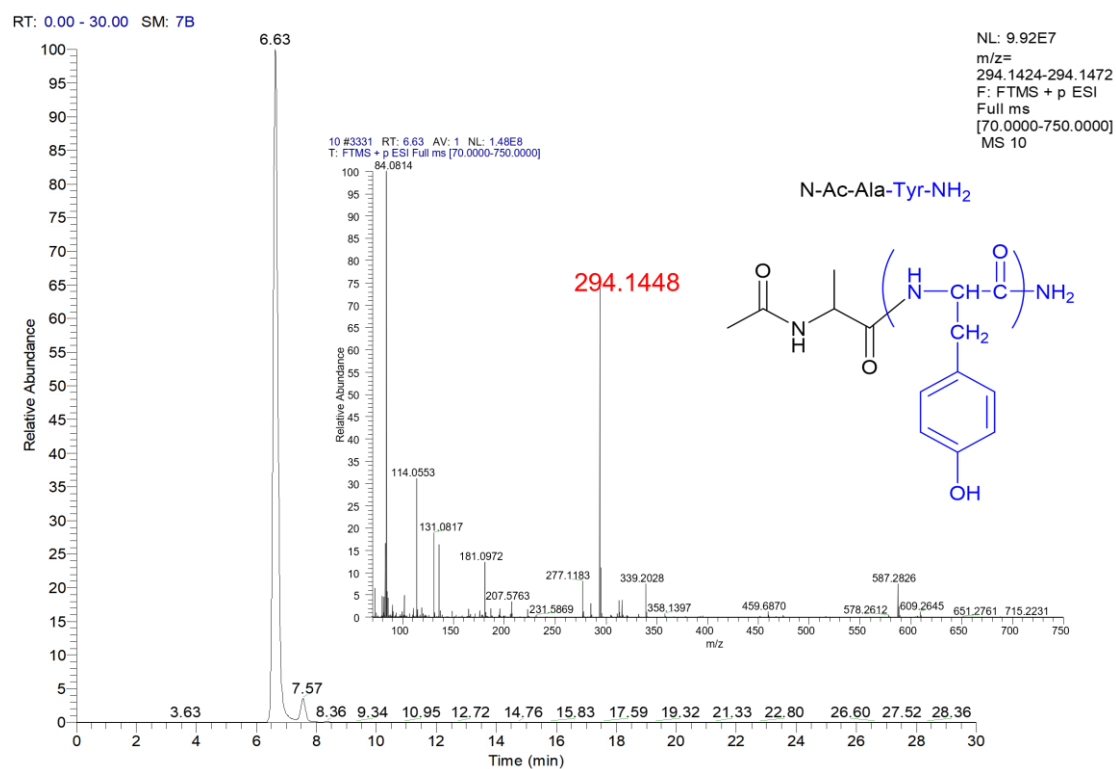

Fig. S79 Extraction ion chromatography-mass spectrometry analysis of the product. The EIC of m/z 294.1448 was analyzed and its EIC corresponded to the dimer N-Ac-Ala-Tyr-NH<sub>2</sub> with a retention time of 6.63 min.

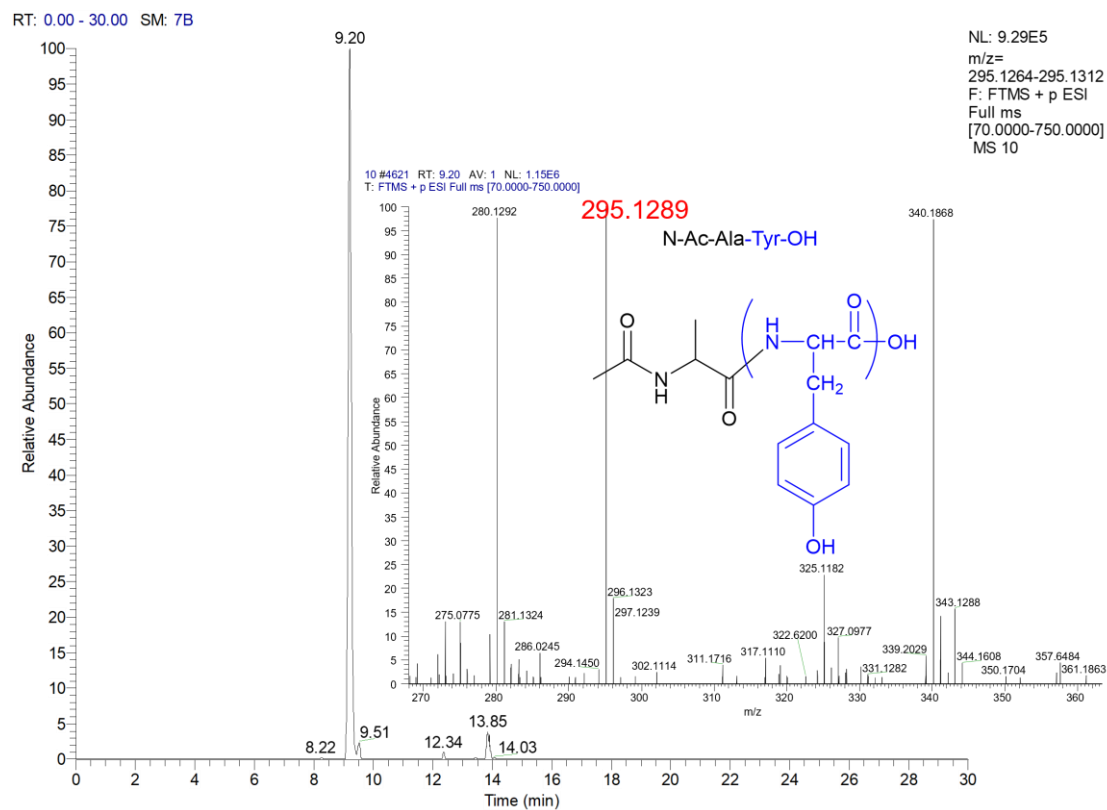

Fig. S80 Extraction ion chromatography-mass spectrometry analysis of the product. The EIC of m/z 295.1289 was analyzed, and its EIC corresponded to the dipeptide N-Ac-Ala-Tyr-OH with a retention time of 9.20 min.

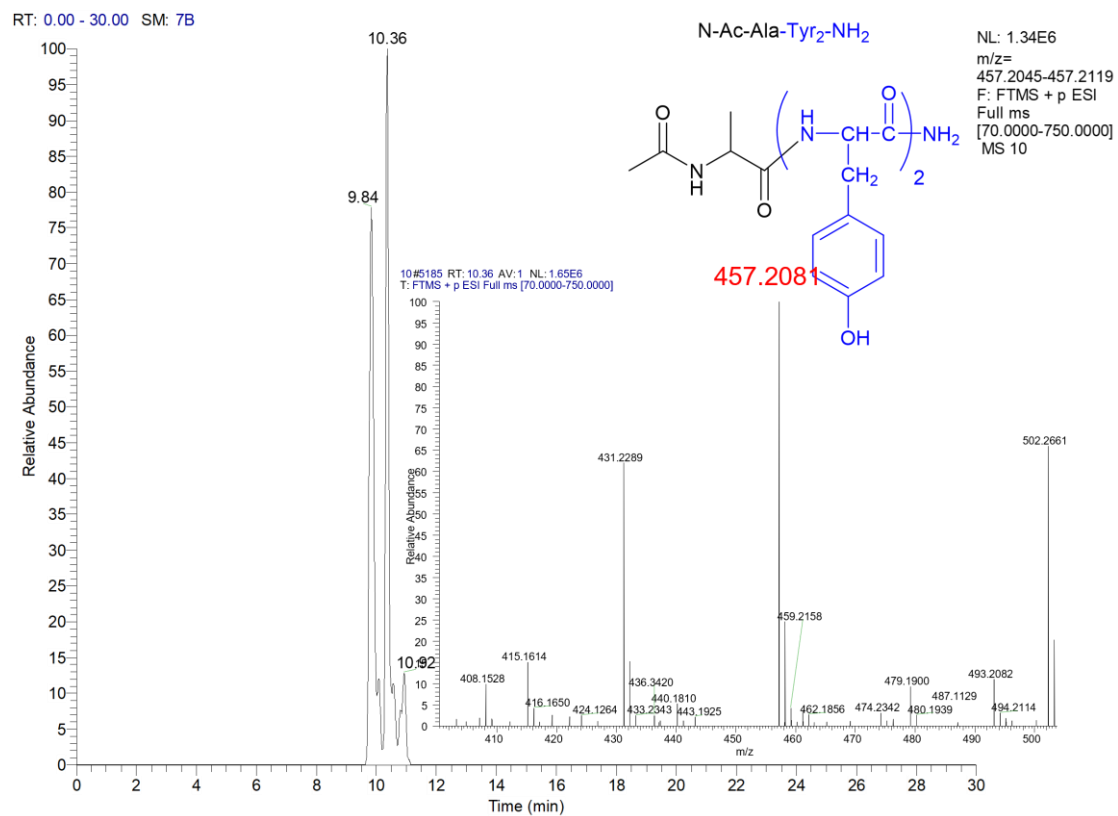

Fig. S81 Extraction ion chromatography-mass spectrometry analysis of the product. The EIC of  $m/z$  457.2081 was analyzed and its EIC corresponded to the trimer N-Ac-Ala-Tyr<sub>2</sub>-NH<sub>2</sub> with a retention time of 10.36 min.



2.19 Secondary mass spectrometry analysis of trimers from the reaction of Ac-Ala-NH<sub>2</sub> with AA-NH<sub>2</sub>. (Figs. S82-S94)

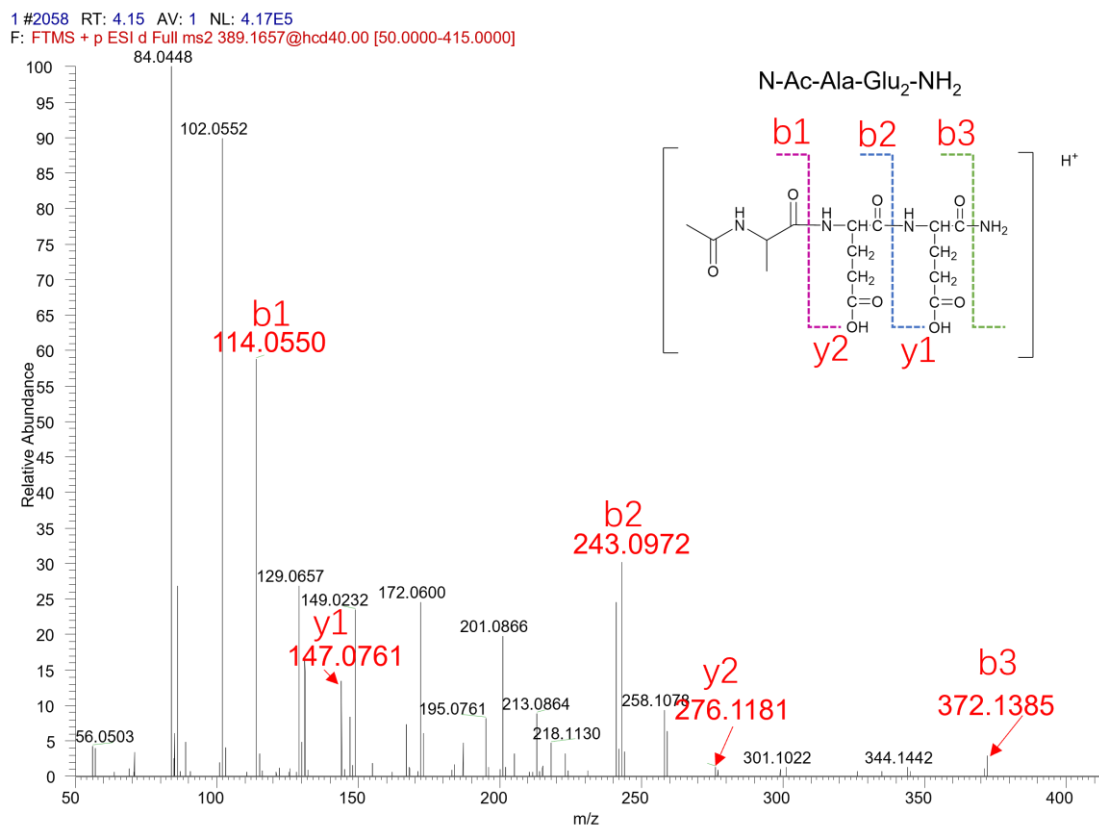

Fig. S82 The extension direction of the trimer was verified by secondary mass spectrometry. The ion flow signal at  $m/z$  389.1657 was extracted, revealing the presence of ion fragments generated by N-Ac-Ala-Glu<sub>2</sub>-NH<sub>2</sub>.

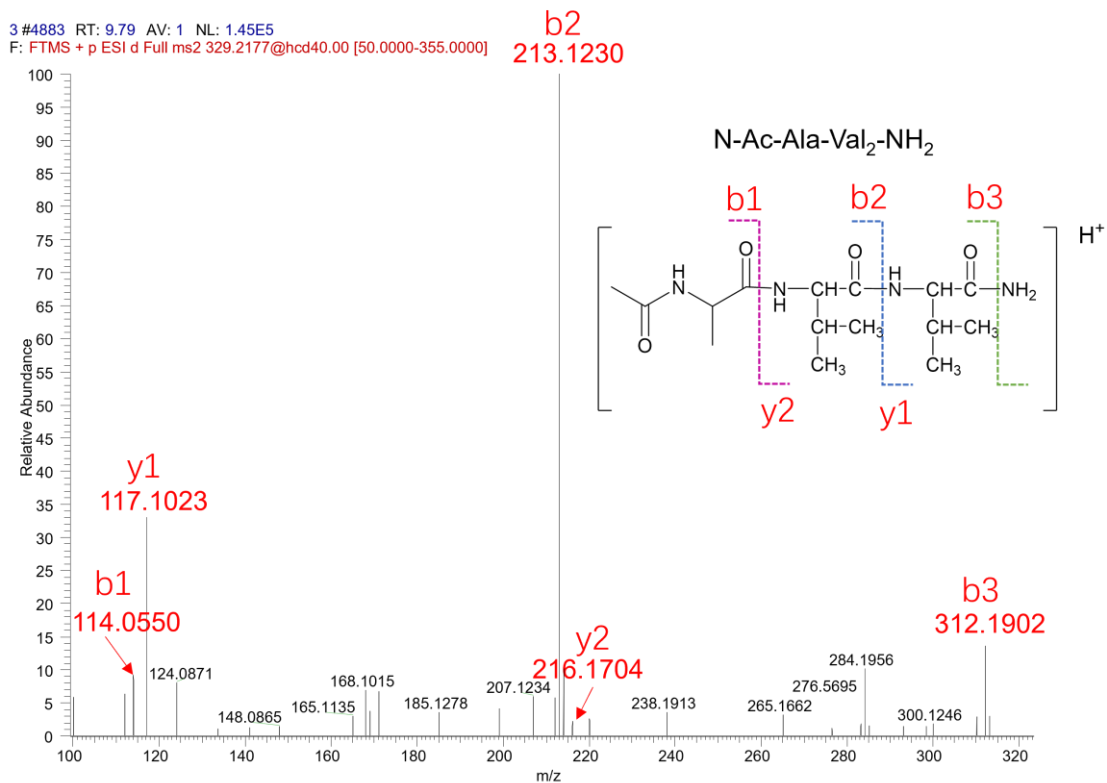

Fig. S83 The extension direction of the trimer was verified by secondary mass spectrometry. The ion flow signal at  $m/z$  329.2177 was extracted, revealing the presence of ion fragments generated by N-Ac-Ala-Val<sub>2</sub>-NH<sub>2</sub>.

4 #1286 RT: 2.55 AV: 1 NL: 1.48E5  
F: FTMS + p ESI d Full ms2 222.1450@hcd40.00 [50.0000-475.0000]

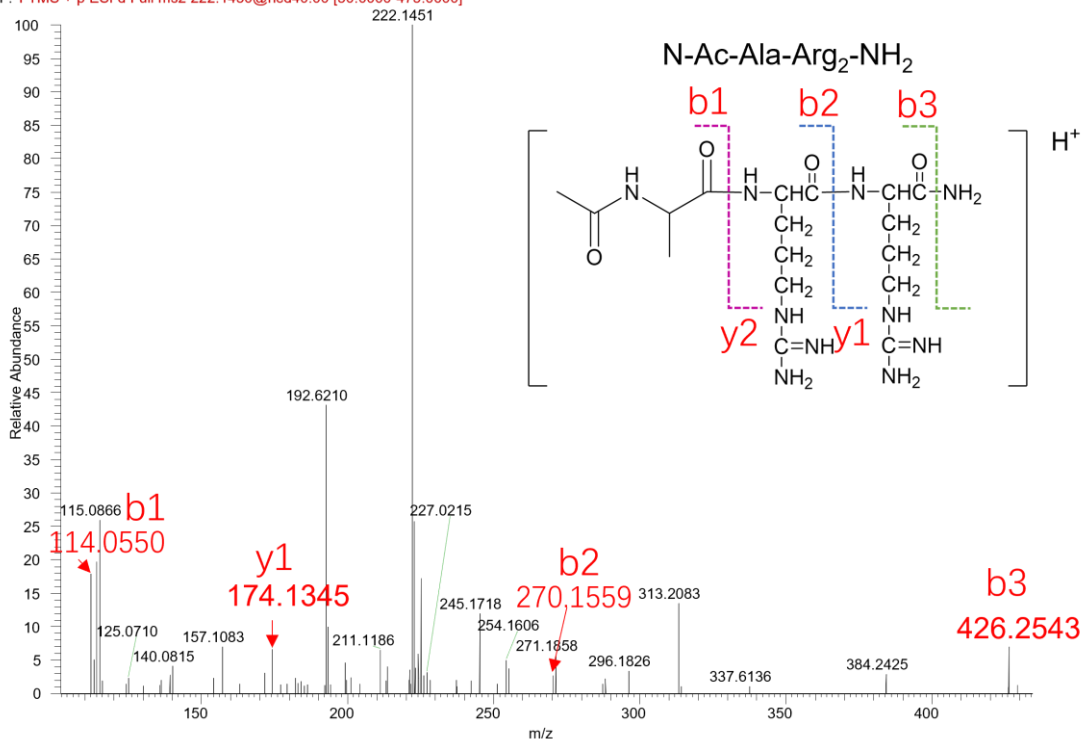

Fig. S84 The extension direction of the trimer was verified by secondary mass spectrometry. The ion flow signal at m/z 222.1450 was extracted, revealing the presence of ion fragments generated by N-Ac-Ala-Arg<sub>2</sub>-NH<sub>2</sub>.

1 #5486 RT: 10.85 AV: 1 NL: 4.76E5  
F: FTMS + p ESI d Full ms2 357.2492@hcd40.00 [50.0000-385.0000]

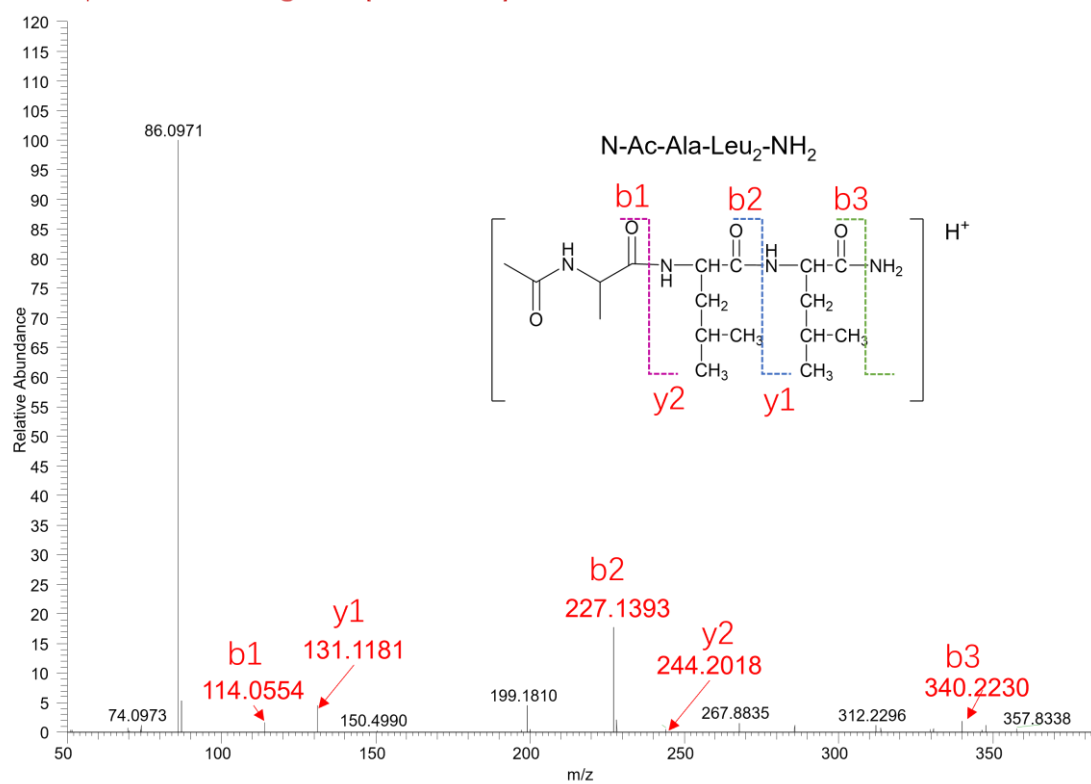

Fig. S85 The extension direction of the trimer was verified by secondary mass spectrometry. The ion flow signal at  $m/z$  357.2492 was extracted, revealing the presence of ion fragments generated by N-Ac-Ala-Leu<sub>2</sub>-NH<sub>2</sub>.

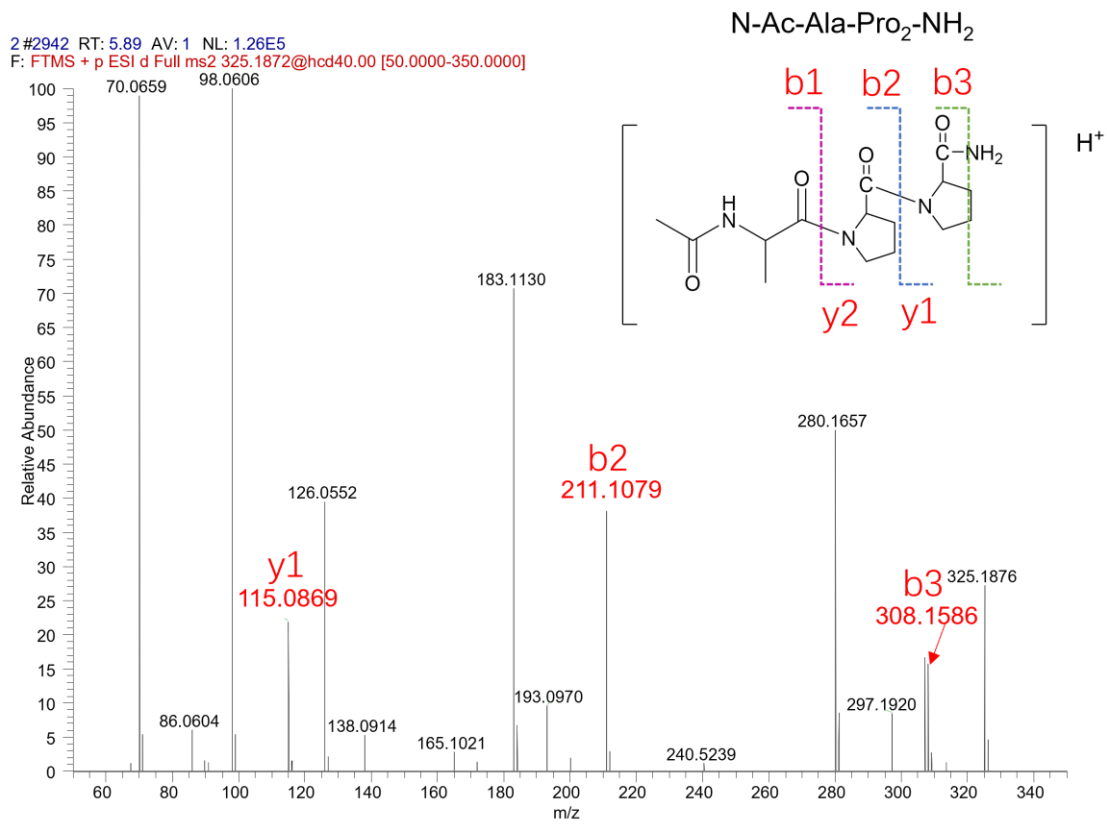

Fig. S86 The extension direction of the trimer was verified by secondary mass spectrometry. The ion flow signal at  $m/z$  325.1872 was extracted, revealing the presence of ion fragments generated by N-Ac-Ala-Pro<sub>2</sub>-NH<sub>2</sub>.

3 #7073 RT: 14.19 AV: 1 NL: 5.25E5  
F: FTMS + p ESI d Full ms2 425.1971@hcd40.00 [50.0000-455.0000]

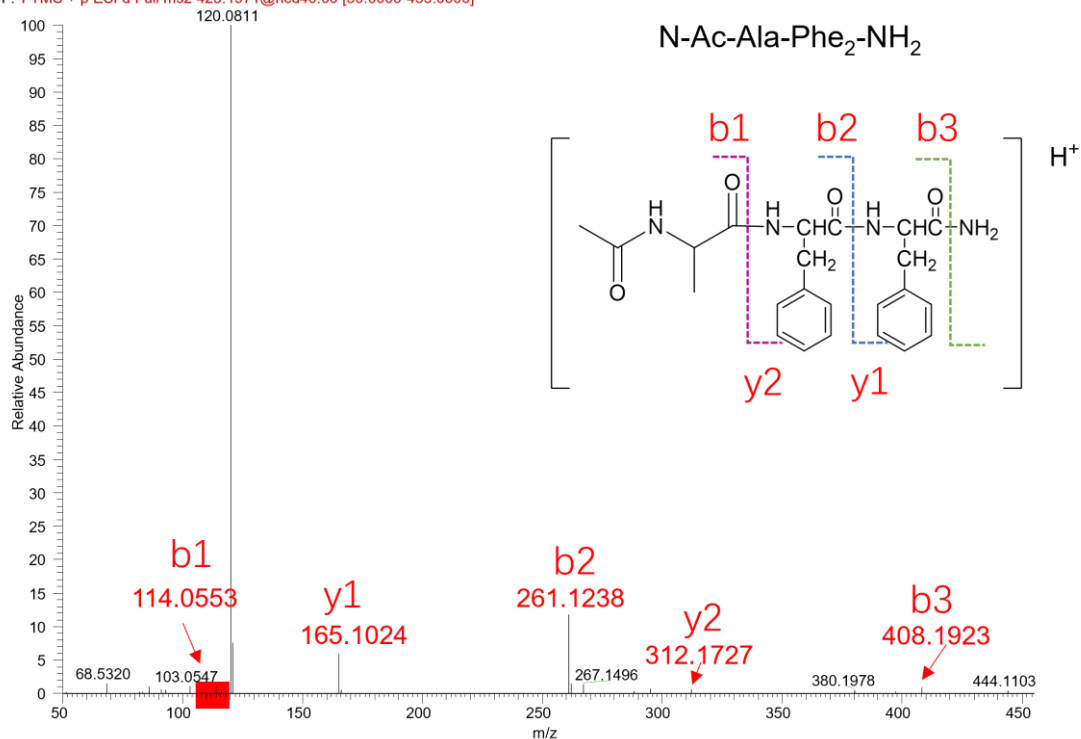

Fig. S87 The extension direction of the trimer was verified by secondary mass spectrometry. The ion flow signal at m/z 425.1971 was extracted, revealing the presence of ion fragments generated by N-Ac-Ala-Phe<sub>2</sub>-NH<sub>2</sub>.

4 #6029 RT: 11.95 AV: 1 NL: 2.03E5  
F: FTMS + p ESI d Full ms2 357.2859@hcd40.00 [50.0000-385.0000]

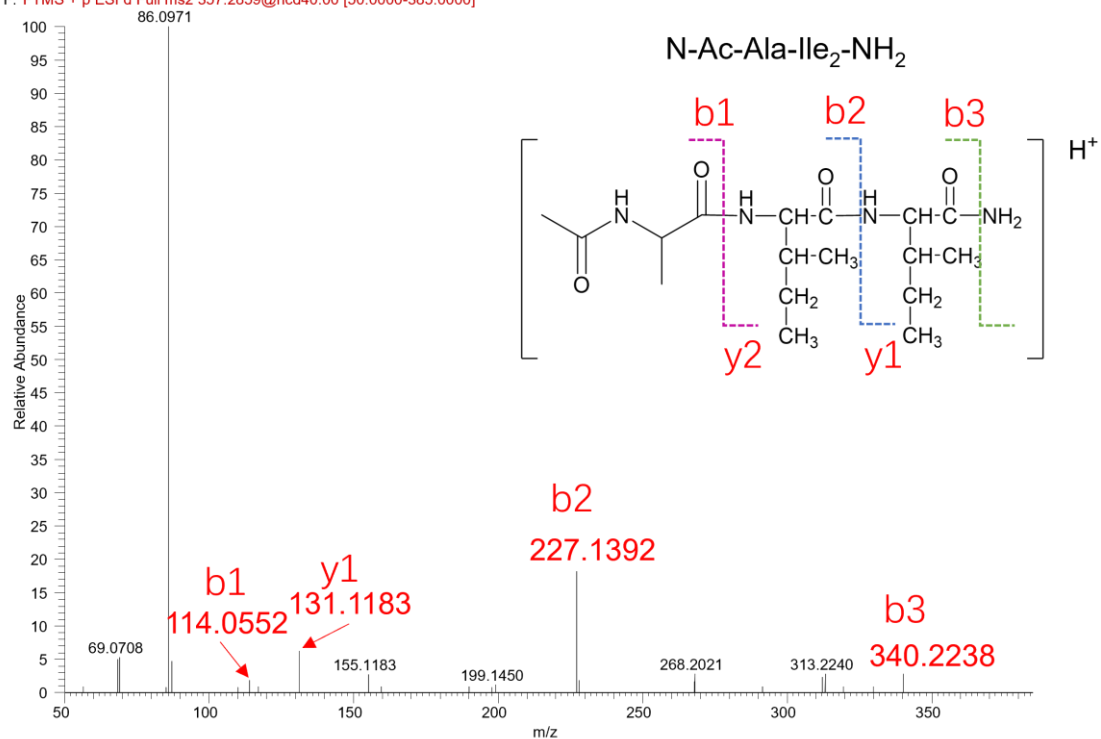

Fig. S88 The extension direction of the trimer was verified by secondary mass spectrometry. The ion flow signal at  $m/z$  357.2859 was extracted, revealing the presence of ion fragments generated by N-Ac-Ala-Ile<sub>2</sub>-NH<sub>2</sub>.

5 #5471 RT: 10.95 AV: 1 NL: 8.27E5  
F: FTMS + p ESI d Full ms2.393.1447@hcd40.00 [50.0000-420.0000]

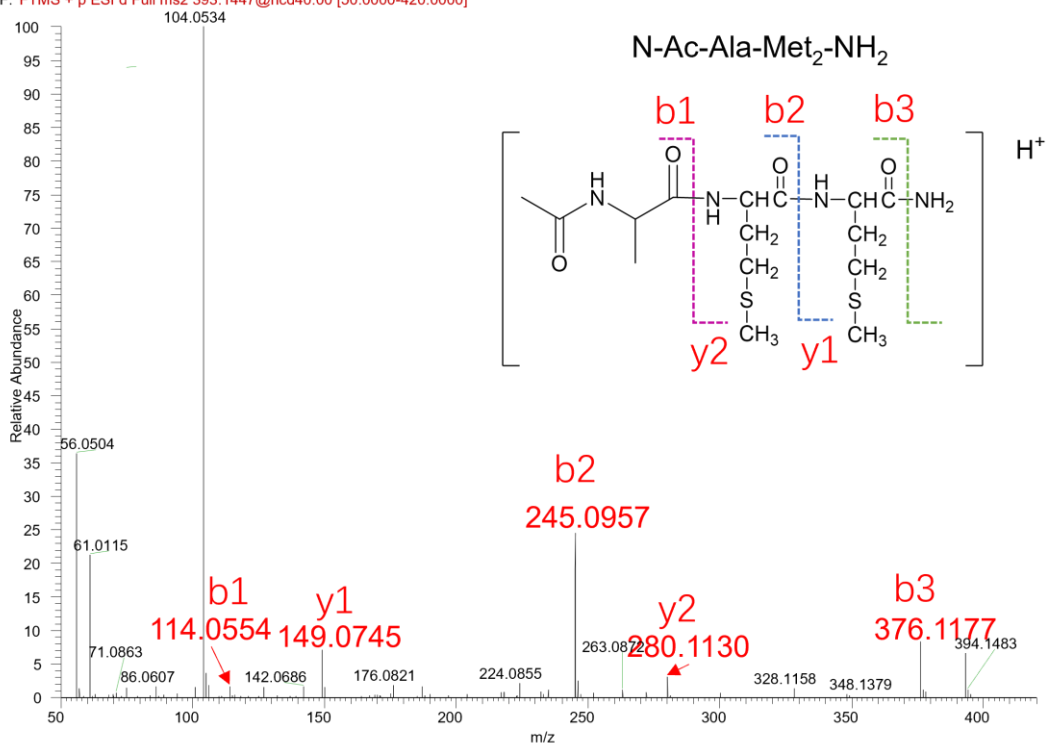

Fig. S89 The extension direction of the trimer was verified by secondary mass spectrometry. The ion flow signal at  $m/z$  393.1447 was extracted, revealing the presence of ion fragments generated by N-Ac-Ala-Met<sub>2</sub>-NH<sub>2</sub>.



6 #1667 RT: 3.31 AV: 1 NL: 2.36E5  
F: FTMS + p ESI d Full ms2 333.1770@hcd40.00 [50.0000-360.0000]

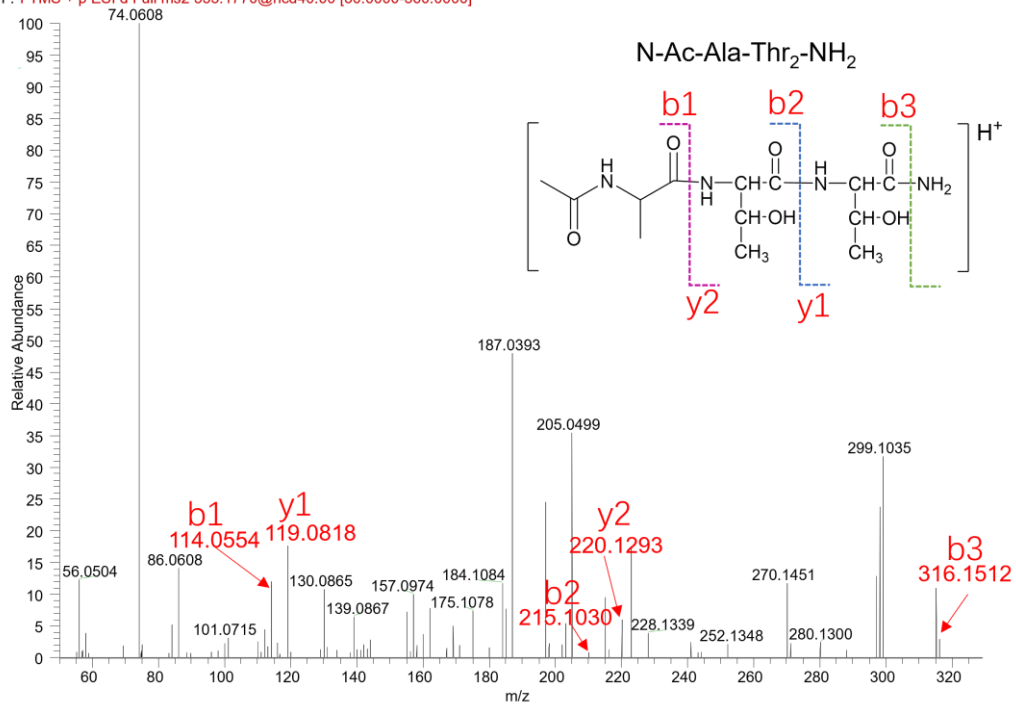

Fig. S90 The extension direction of the trimer was verified by secondary mass spectrometry. The ion flow signal at  $m/z$  333.1770 was extracted, revealing the presence of ion fragments generated by N-Ac-Ala-Thr<sub>2</sub>-NH<sub>2</sub>.

7 #7188 RT: 14.55 AV: 1 NL: 3.26E5  
F: FTMS + p ESI d Full ms2 503.2404@hcd40.00 [50.0000-535.0000]

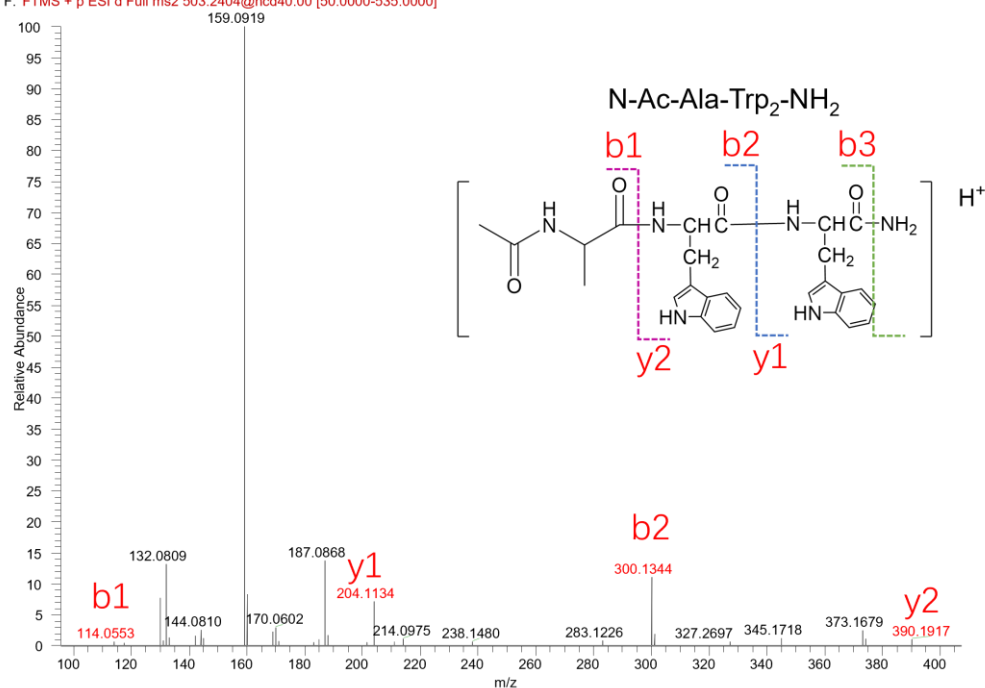

Fig. S91 The extension direction of the trimer was verified by secondary mass spectrometry. The ion flow signal at  $m/z$  503.2404 was extracted, revealing the presence of ion fragments generated by N-Ac-Ala-Trp<sub>2</sub>-NH<sub>2</sub>.

8 #1163 RT: 2.30 AV: 1 NL: 1.28E6  
F: FTMS + p ESI d Full ms2 405.1990@hcd40.00 [50.0000-435.0000]

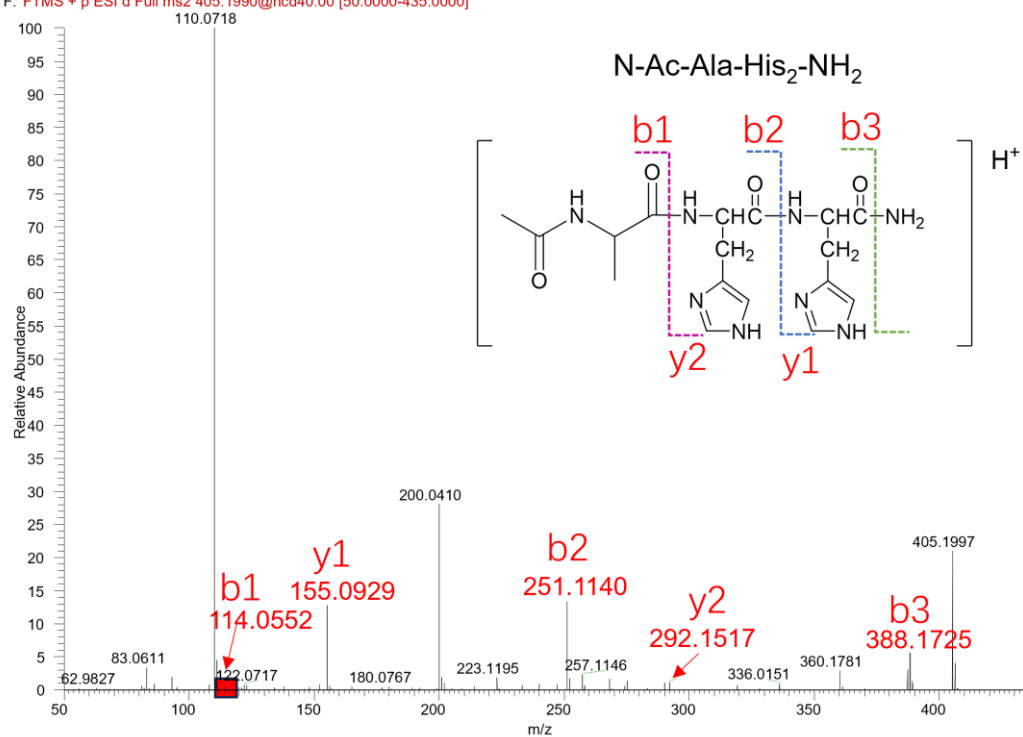

Fig. S92 The extension direction of the trimer was verified by secondary mass spectrometry. The ion flow signal at m/z 405.1990 was extracted, revealing the presence of ion fragments generated by N-Ac-Ala-His<sub>2</sub>-NH<sub>2</sub>.

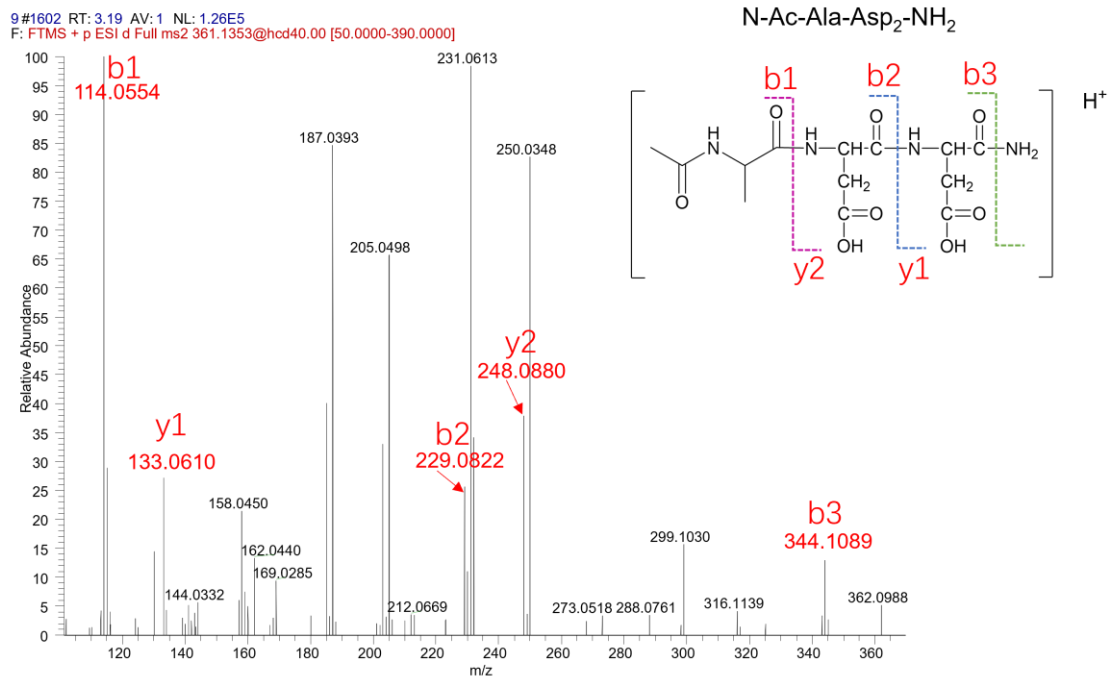

Fig. S93 The extension direction of the trimer was verified by secondary mass spectrometry. The ion flow signal at m/z 361.1353 was extracted, revealing the presence of ion fragments generated by N-Ac-Ala-Asp<sub>2</sub>-NH<sub>2</sub>.

10 #5157 RT: 10.30 AV: 1 NL: 6.27E5  
F: FTMS + p ESI d Full ms2 457.2082@hcd40.00 [50.0000-485.0000]

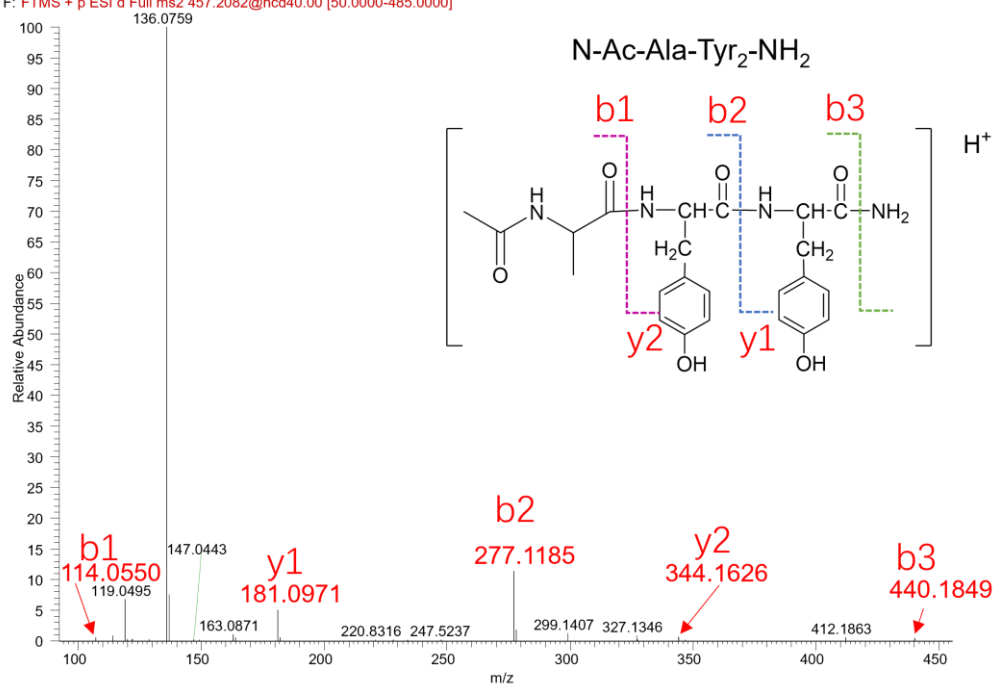

Fig. S94 The extension direction of the trimer was verified by secondary mass spectrometry. The ion flow signal at  $m/z$  457.2082 was extracted, revealing the presence of ion fragments generated by N-Ac-Ala-Tyr<sub>2</sub>-NH<sub>2</sub>

2.20 Table S1 Peptide synthesis of N-acetyl-Gly-NH<sub>2</sub> with AA-NH<sub>2</sub>.

| Entry | AA-NH <sub>2</sub>  | Highest polymer<br>(N-Ac-Gly-AA <sub>n</sub> -NH <sub>2</sub> ) | Highest polymer<br>(N-Ac-Gly-AA <sub>n</sub> -OH) |
|-------|---------------------|-----------------------------------------------------------------|---------------------------------------------------|
| 1     | Asp-NH <sub>2</sub> | 6                                                               | 4                                                 |
| 2     | Glu-NH <sub>2</sub> | 5                                                               | 4                                                 |
| 3     | Met-NH <sub>2</sub> | 5                                                               | 5                                                 |
| 4     | His-NH <sub>2</sub> | 5                                                               | 3                                                 |
| 5     | Gly-NH <sub>2</sub> | 4                                                               | 3                                                 |
| 6     | Ser-NH <sub>2</sub> | 4                                                               | 4                                                 |
| 7     | Val-NH <sub>2</sub> | 4                                                               | 4                                                 |
| 8     | Leu-NH <sub>2</sub> | 4                                                               | 3                                                 |
| 9     | Pro-NH <sub>2</sub> | 4                                                               | 3                                                 |
| 10    | Phe-NH <sub>2</sub> | 4                                                               | 4                                                 |
| 11    | Thr-NH <sub>2</sub> | 4                                                               | 2                                                 |
| 12    | Tyr-NH <sub>2</sub> | 4                                                               | 3                                                 |
| 13    | Arg-NH <sub>2</sub> | 3                                                               | 2                                                 |
| 14    | Lys-NH <sub>2</sub> | 3                                                               | 2                                                 |
| 15    | Ile-NH <sub>2</sub> | 3                                                               | 3                                                 |
| 16    | Trp-NH <sub>2</sub> | 3                                                               | 3                                                 |

2.21 Oligomer produced by the polymerization of 0.1 M Ac-Gly-NH<sub>2</sub> and 0.1 M Ala-NH<sub>2</sub>. (Figs. S95-S98)

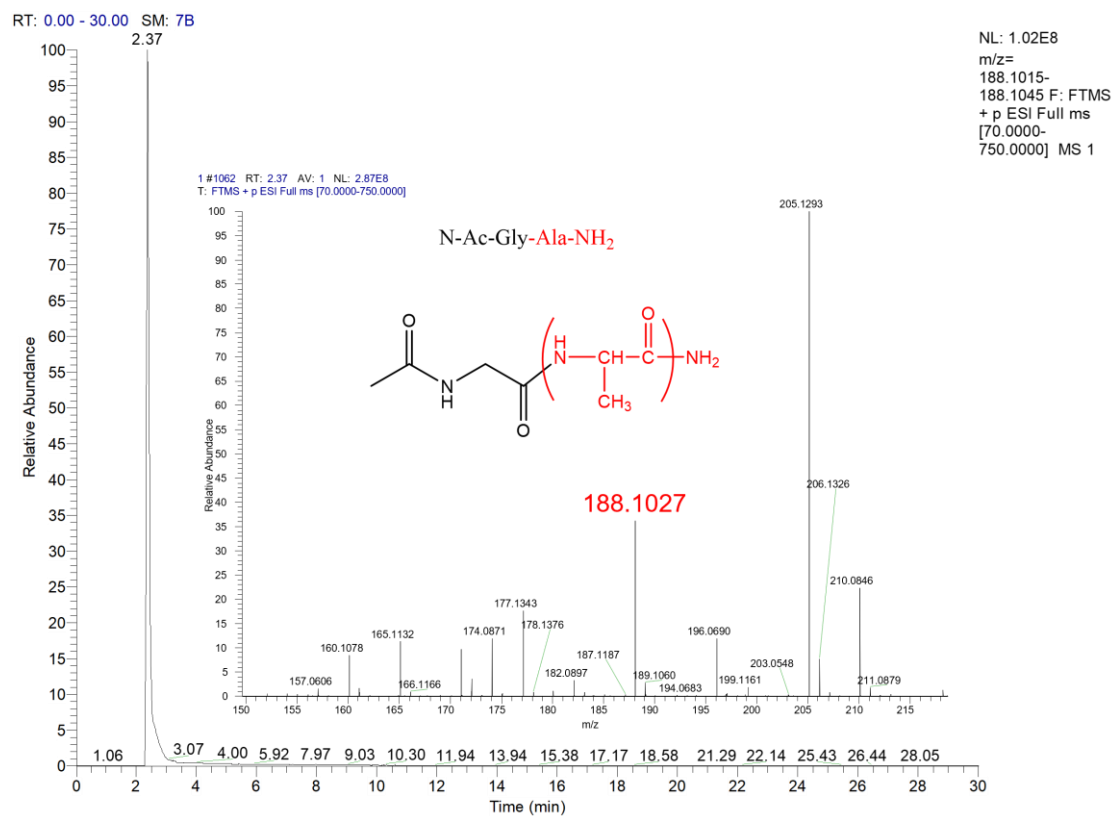

Fig. S95 Extraction ion chromatography-mass spectrometry analysis of the product. The EIC of m/z 188.1027 was analyzed and its EIC corresponded to the dimer N-Ac-Gly-Ala-NH<sub>2</sub> with a retention time of 2.37 min.

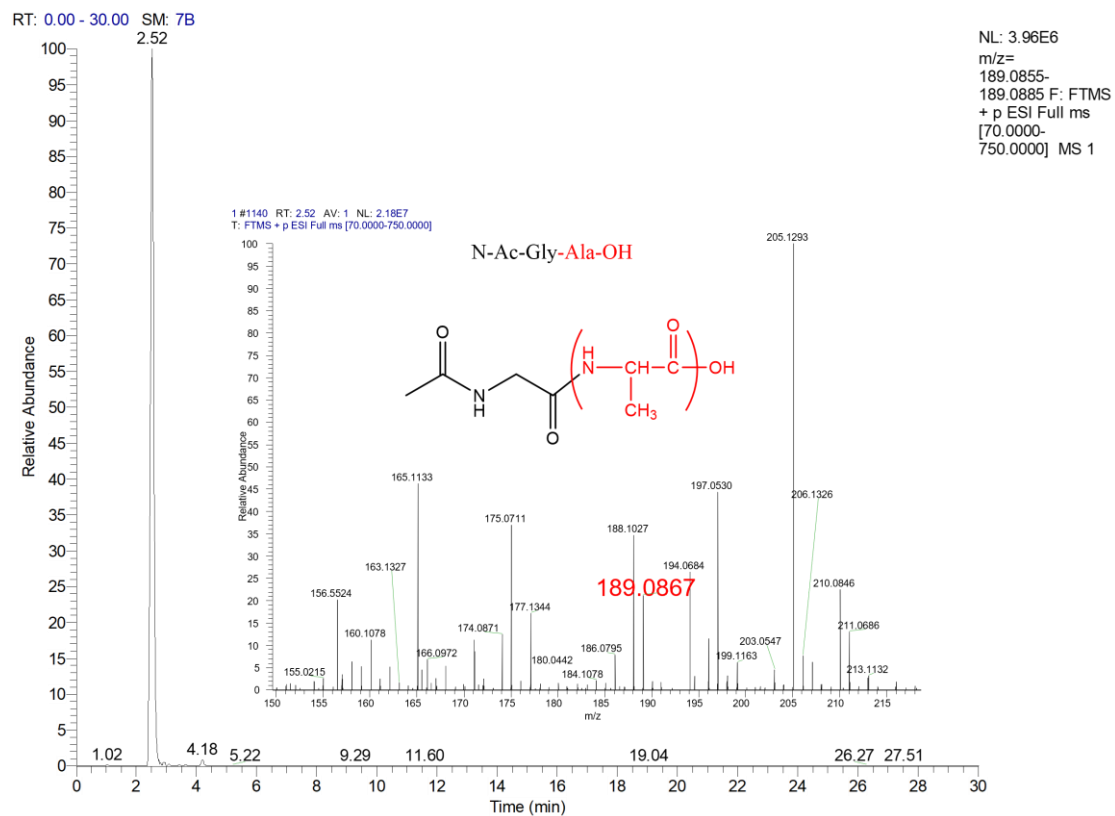

Fig. S96 Extraction ion chromatography-mass spectrometry analysis of the product. The EIC of m/z 189.0867 was analyzed and its EIC corresponded to the dipeptide N-Ac-Gly-Ala-OH with a retention time of 2.52 min.



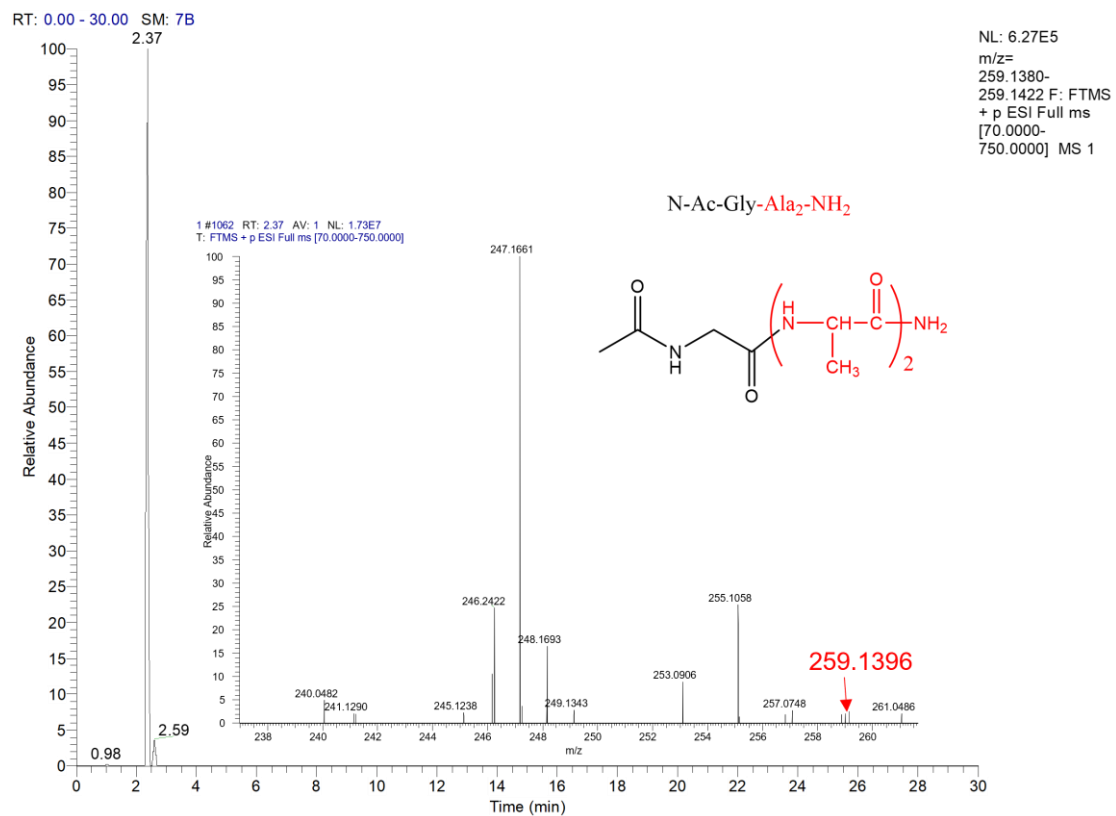

Fig. S97 Extraction ion chromatography-mass spectrometry analysis of the product. The EIC of m/z 259.1396 was analyzed and its EIC corresponded to the trimer N-Ac-Gly-Ala<sub>2</sub>-NH<sub>2</sub> with a retention time of 2.37 min.

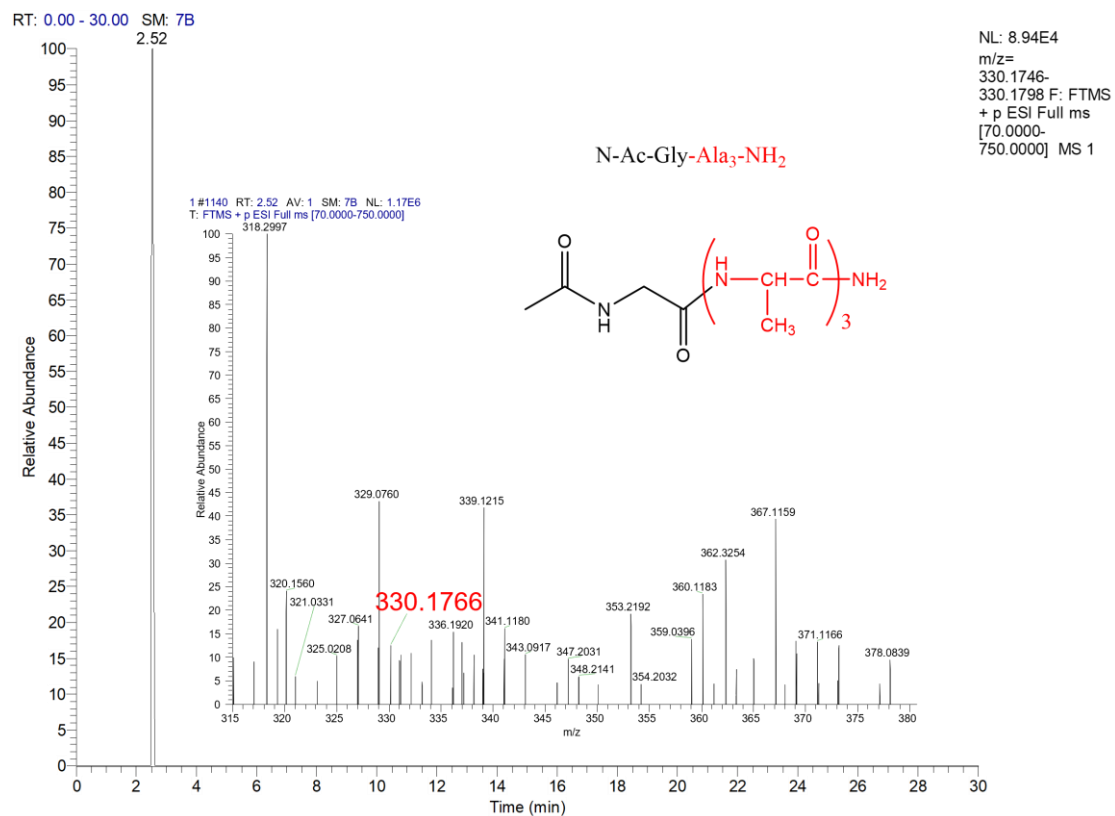

Fig. S98 Extraction ion chromatography-mass spectrometry analysis of the product. The EIC of m/z 330.1766 was analyzed and its EIC corresponded to the tetramer N-Ac-Gly-Ala<sub>3</sub>-NH<sub>2</sub> with a retention time of 2.52 min.

2.22 Oligomer produced by the polymerization of 0.1 M Ac-Gly-NH<sub>2</sub> and 0.1 M Glu-NH<sub>2</sub>. (Figs. S99-S105)

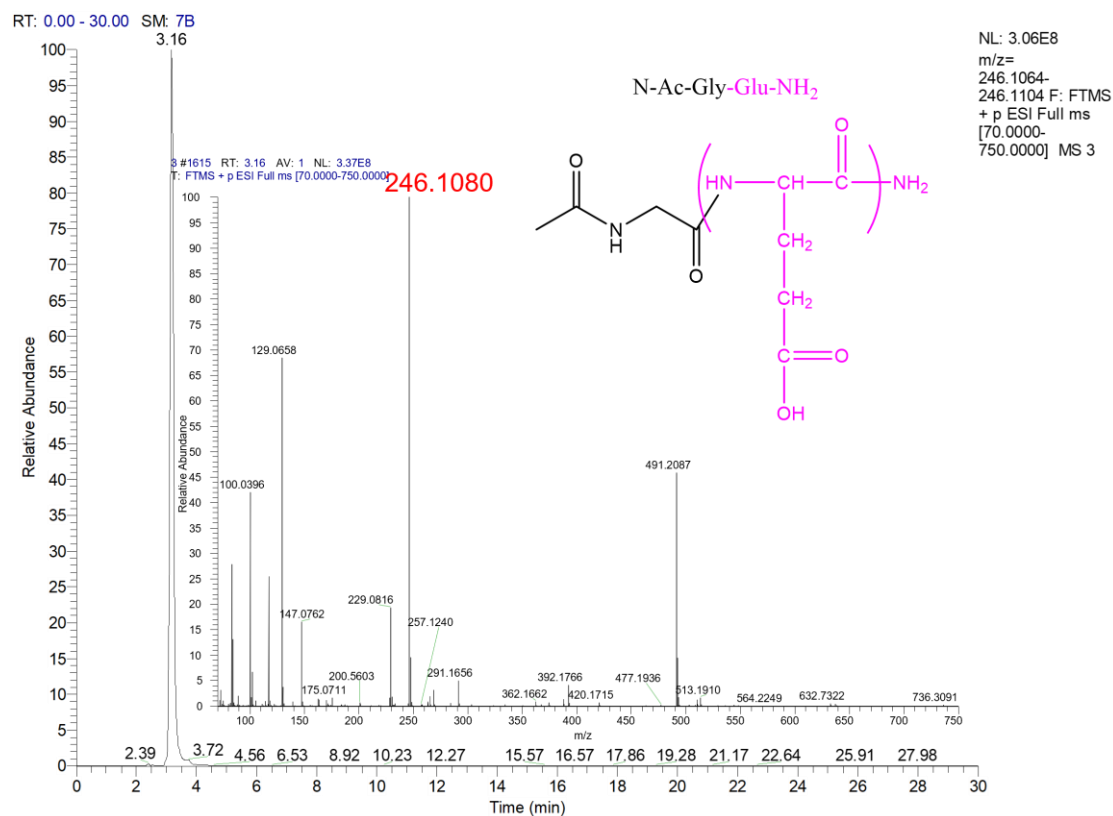

Fig. S99 Extraction ion chromatography-mass spectrometry analysis of the product. The EIC of m/z 246.1080 was analyzed and its EIC corresponded to the dimer N-Ac-Gly-Glu-NH<sub>2</sub> with a retention time of 3.16 min.

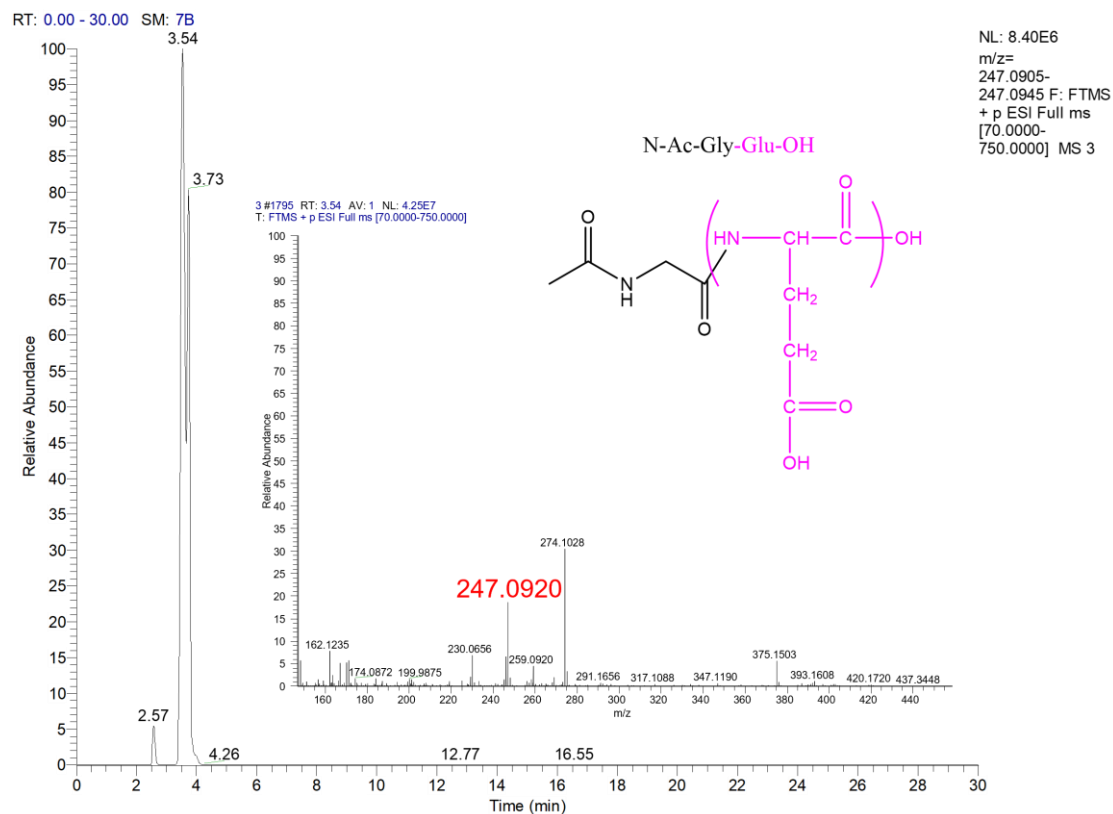

Fig. S100 Extraction ion chromatography-mass spectrometry analysis of the product. The EIC of m/z 247.0920 was analyzed and its EIC corresponded to the dipeptide N-Ac-Gly-Glu-OH with a retention time of 3.54 min.

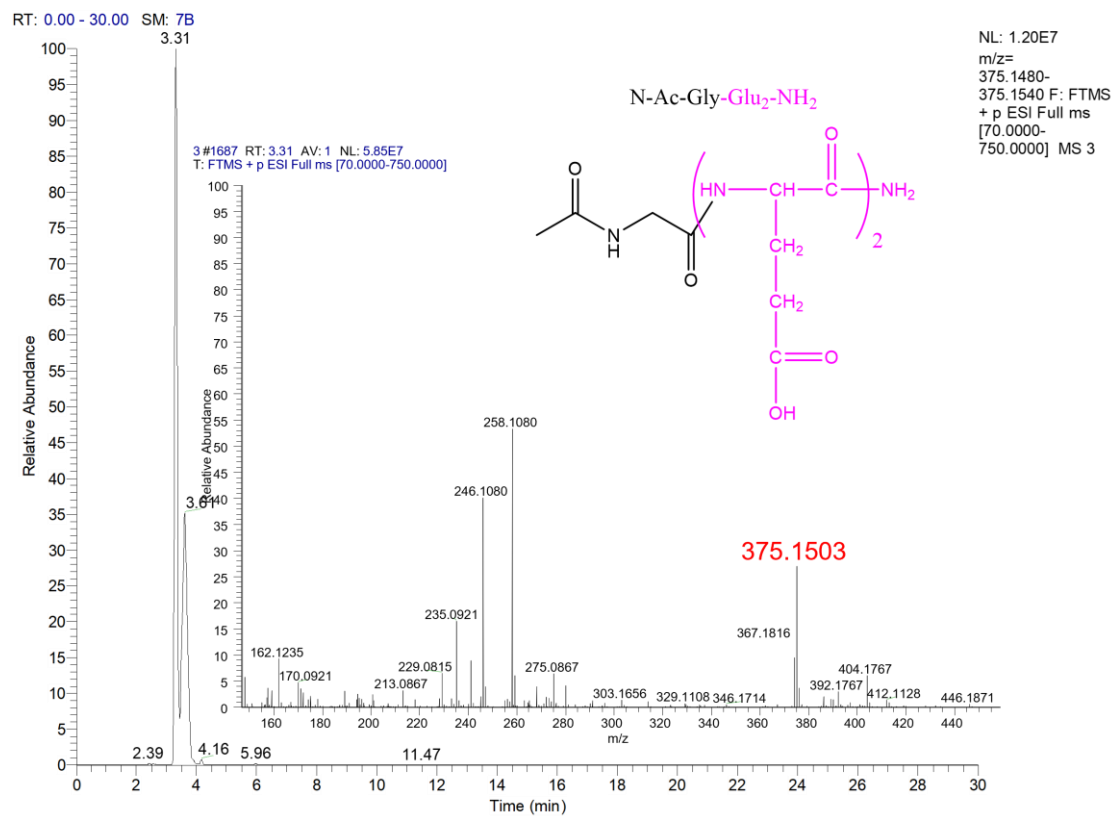

Fig. S101 Extraction ion chromatography-mass spectrometry analysis of the product. The EIC of m/z 375.1503 was analyzed and its EIC corresponded to the trimer N-Ac-Gly-Glu<sub>2</sub>-NH<sub>2</sub> with a retention time of 3.31 min.

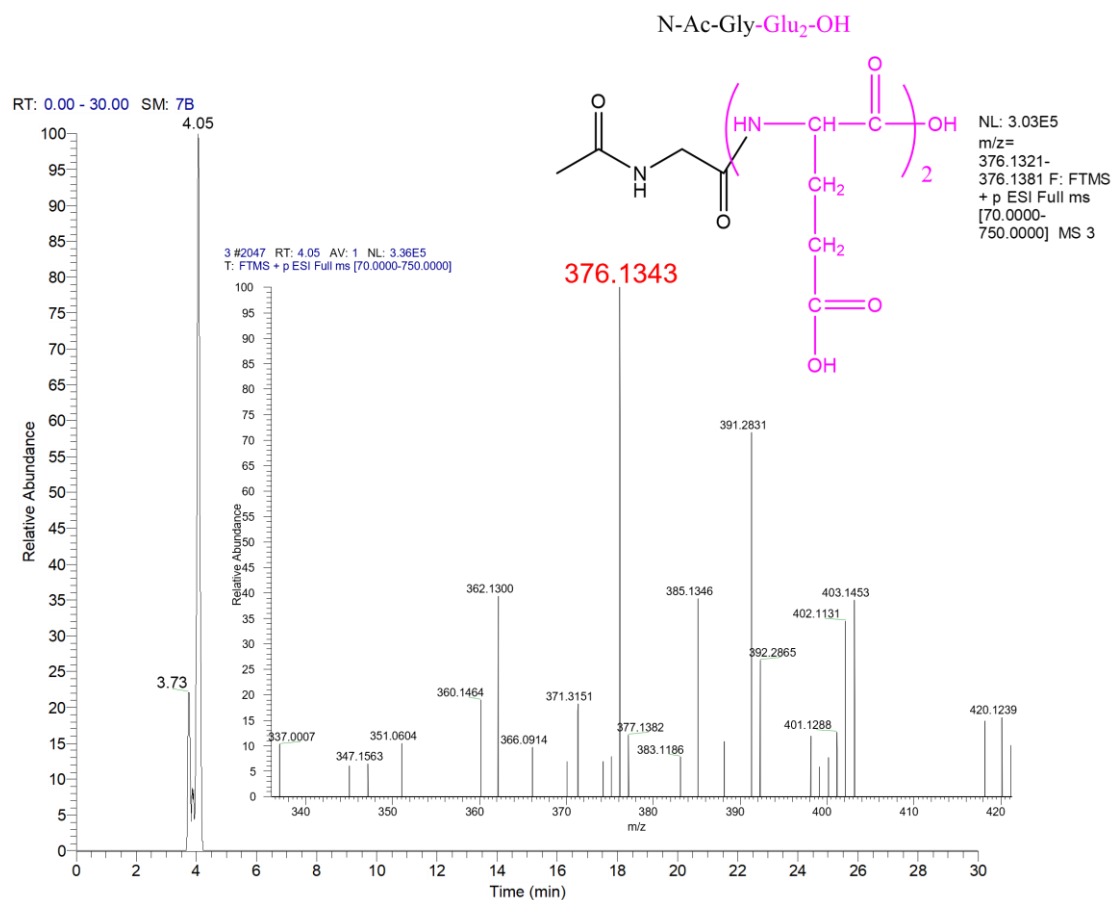

Fig. S102 Extraction ion chromatography-mass spectrometry analysis of the product. The EIC of  $m/z$  376.1343 was analyzed, and its EIC corresponded to the tripeptide N-Ac-Gly-Glu<sub>2</sub>-OH with a retention time of 4.05 min.

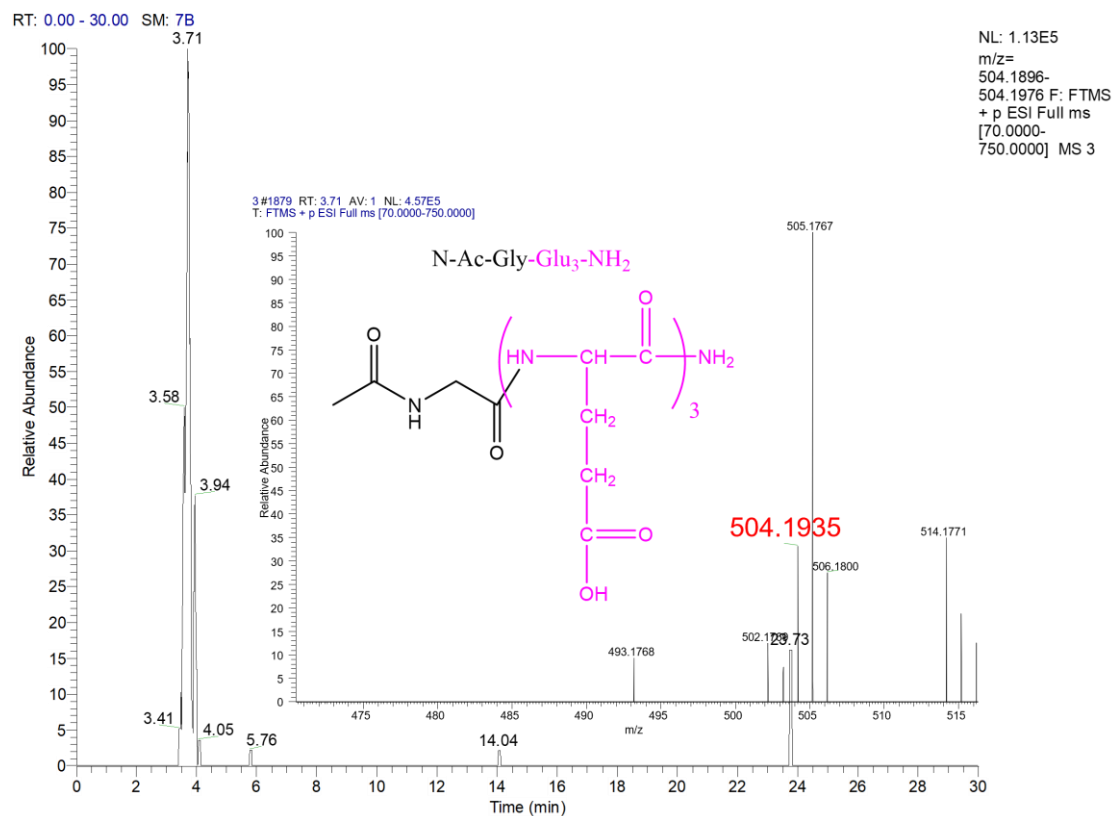

Fig. S103 Extraction ion chromatography-mass spectrometry analysis of the product. The EIC of  $m/z$  504.1935 was analyzed and its EIC corresponded to the tetramer N-Ac-Gly-Glu<sub>3</sub>-NH<sub>2</sub> with a retention time of 3.71 min.

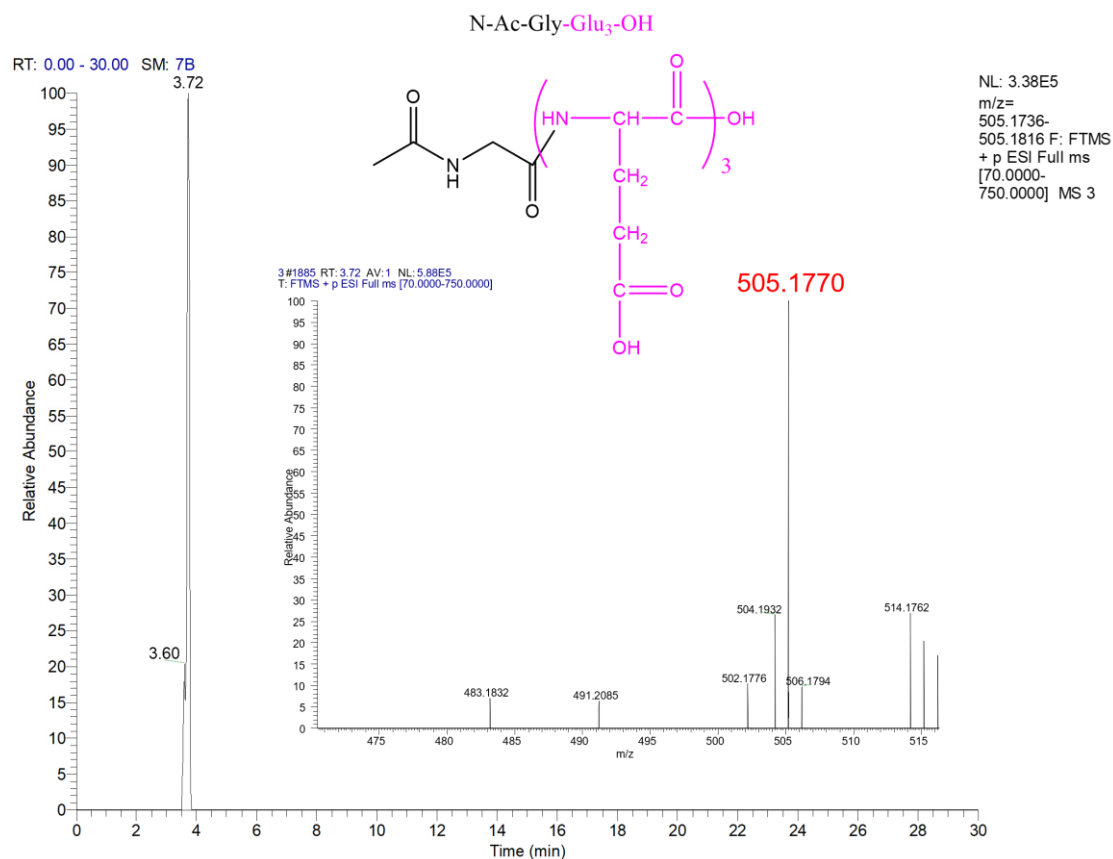

Fig. S104 Extraction ion chromatography-mass spectrometry analysis of the product. The EIC of m/z 505.1770 was analyzed and its EIC corresponded to the tetrapeptide N-Ac-Gly-Glu<sub>3</sub>-OH with a retention time of 3.72 min.



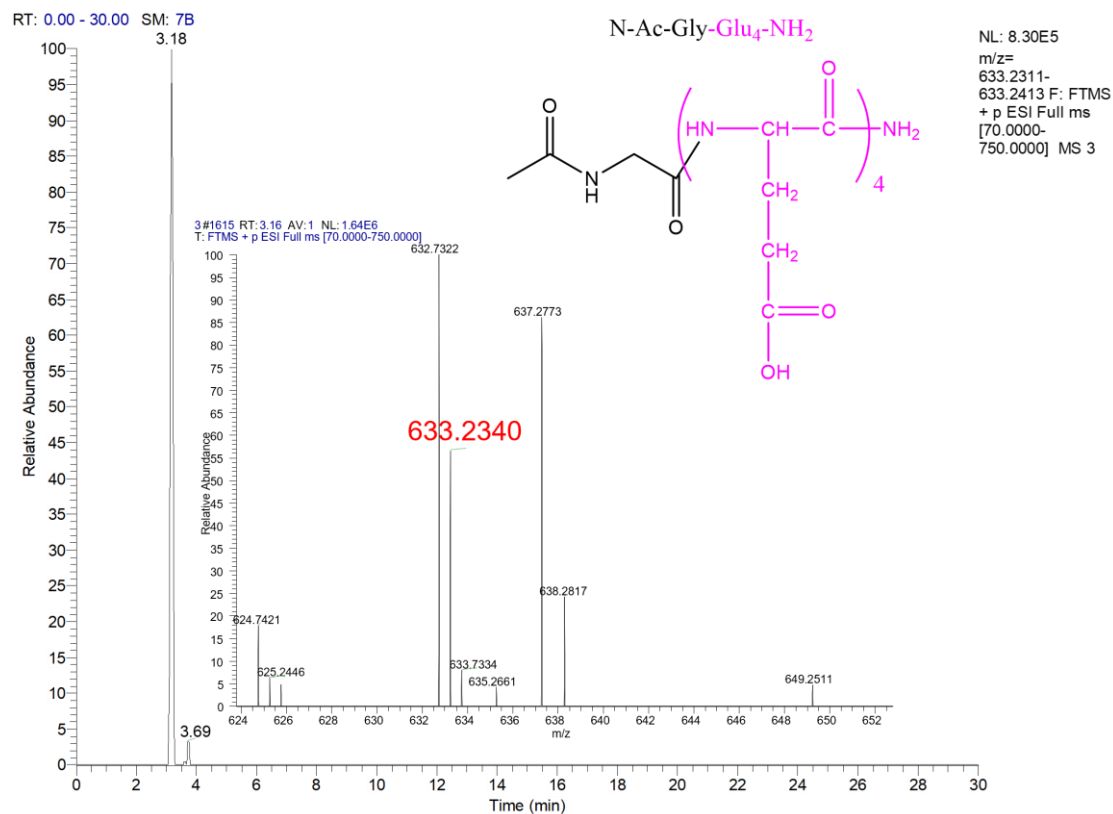

Fig. S105 Extraction ion chromatography-mass spectrometry analysis of the product. The EIC of m/z 633.2340 was analyzed, and its EIC corresponded to the pentamer N-Ac-Gly-Glu<sub>4</sub>-NH<sub>2</sub> with a retention time of 3.16 min.

2.23 Oligomer produced by the polymerization of 0.1 M Ac-Gly-NH<sub>2</sub> and 0.1 M Ser-NH<sub>2</sub>. (Figs. S106-S110)

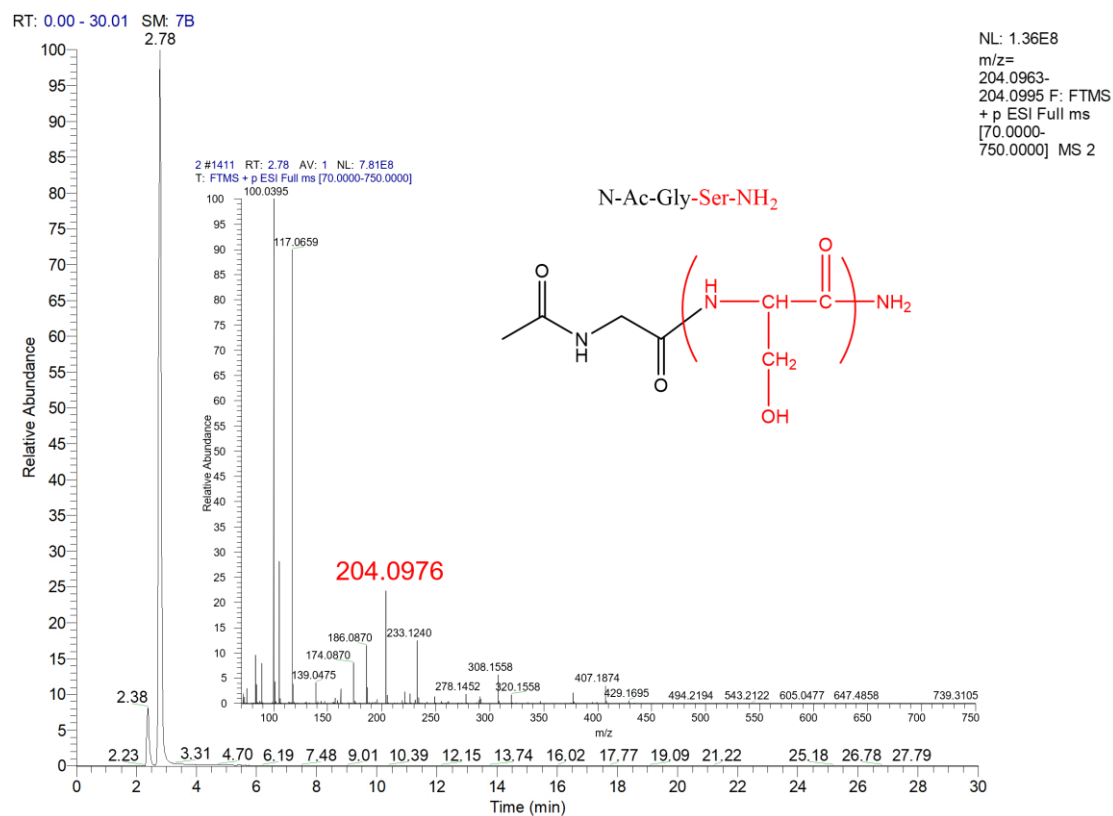

Fig. S106 Extraction ion chromatography-mass spectrometry analysis of the product. The EIC of m/z 204.0976 was analyzed and its EIC corresponds to the dimer N-Ac-Gly-Ser-NH<sub>2</sub> with a retention time of 2.78 min.

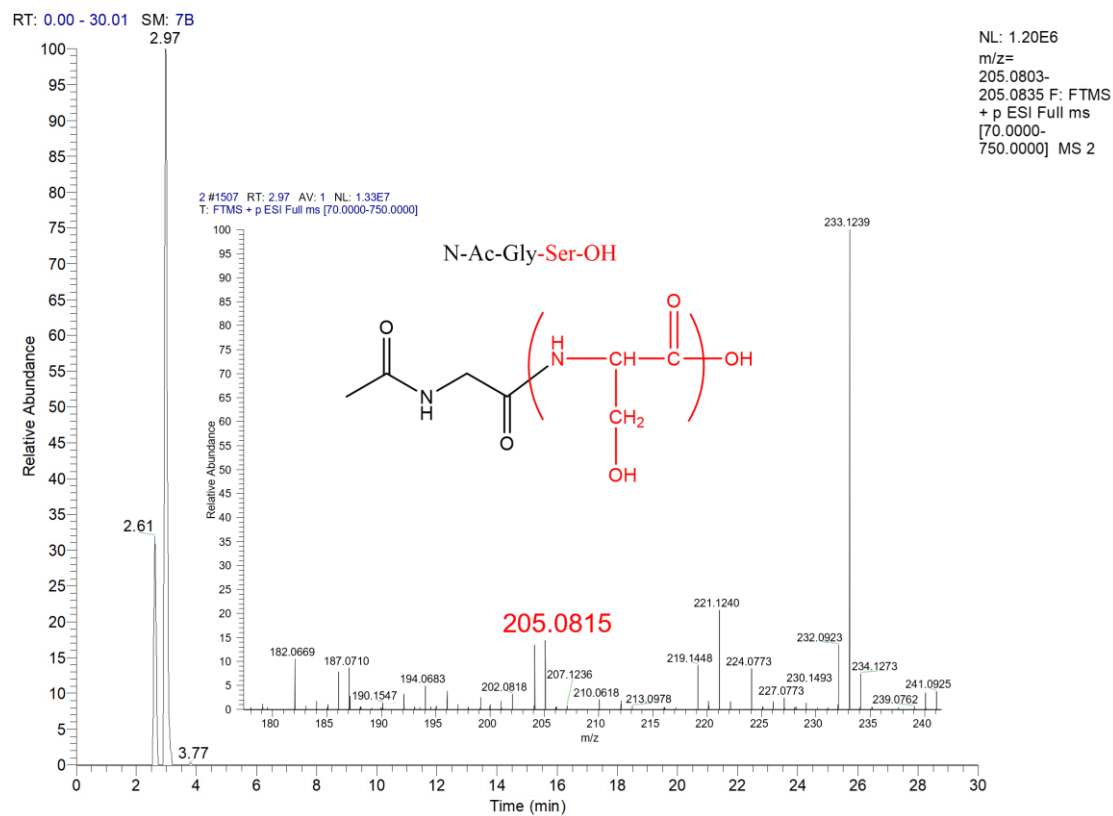

Fig. S107 Extraction ion chromatography-mass spectrometry analysis of the product. The EIC of m/z 205.0815 was analyzed and its EIC corresponded to the dipeptide N-Ac-Gly-Ser-OH with a retention time of 2.97 min.

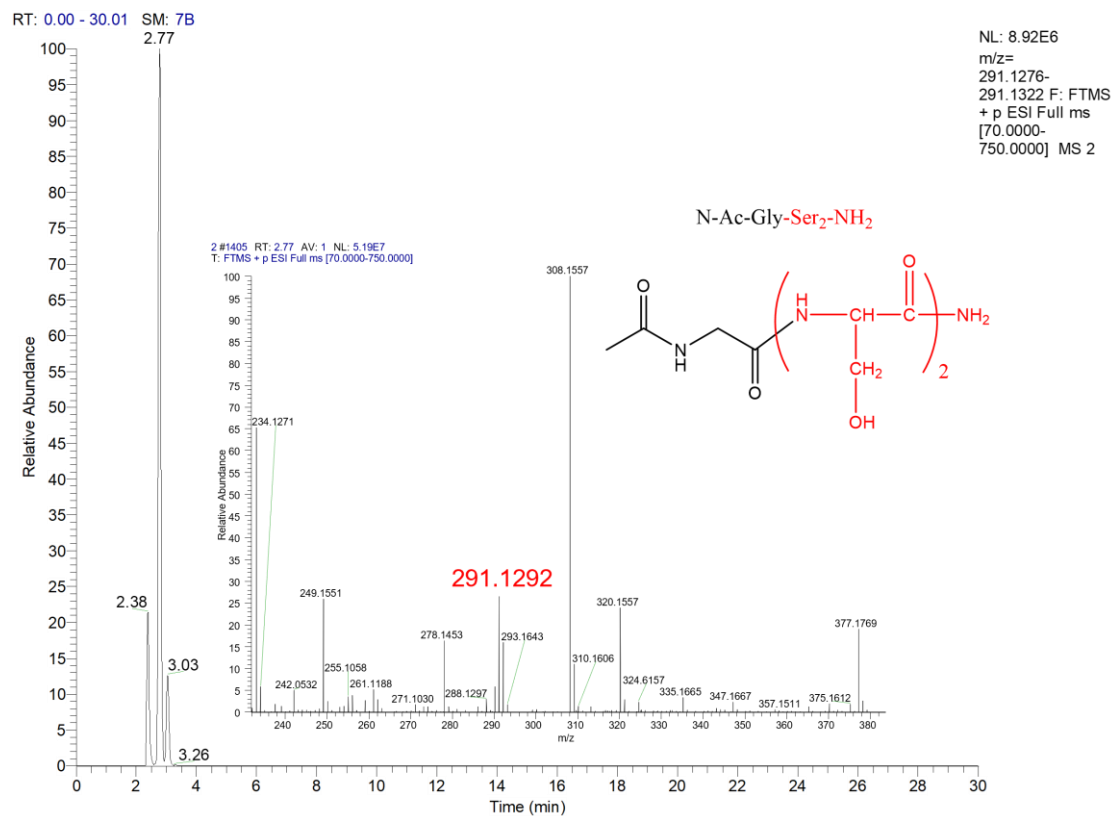

Fig. S108 Extraction ion chromatography-mass spectrometry analysis of the product. The EIC of m/z 291.1292 was analyzed and its EIC corresponded to the trimer N-Ac-Gly-Ser<sub>2</sub>-NH<sub>2</sub> with a retention time of 2.77 min.

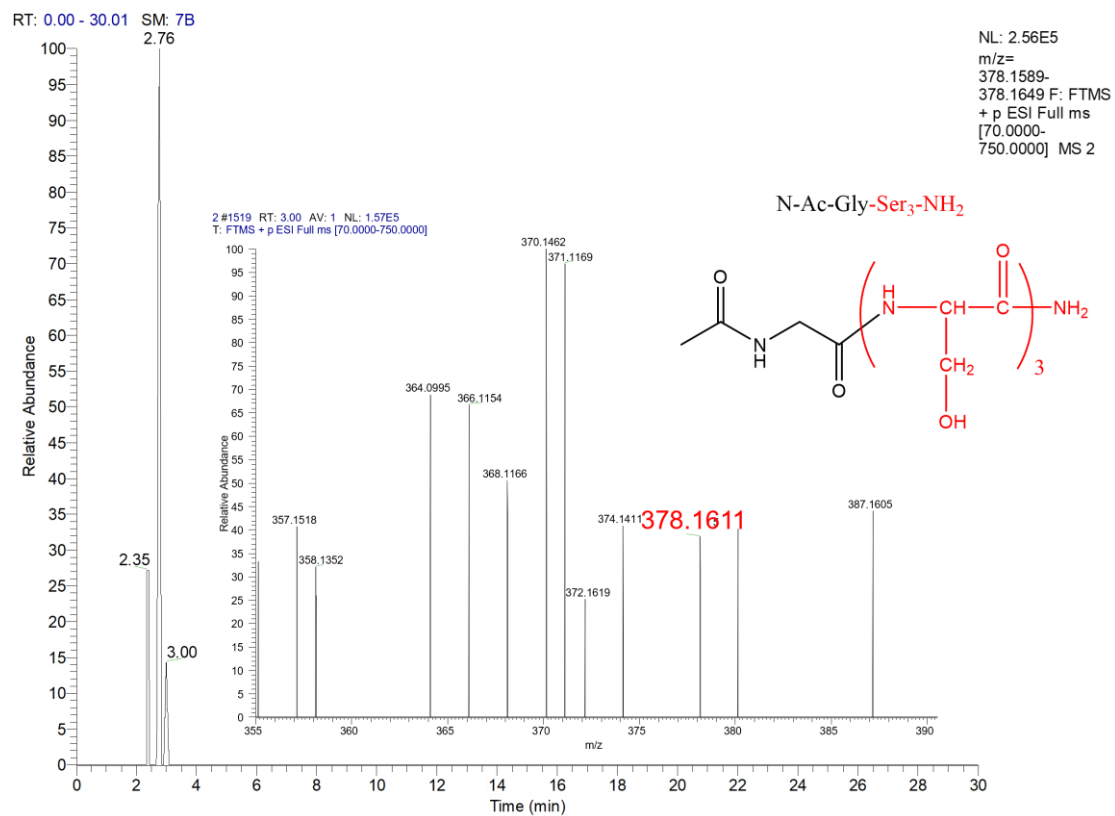

Fig. S109 Extraction ion chromatography-mass spectrometry analysis of the product. The EIC of m/z 378.1611 was analyzed and its EIC corresponded to the tracer N-Ac-Gly-Ser<sub>3</sub>-NH<sub>2</sub> with a retention time of 3.00 min.

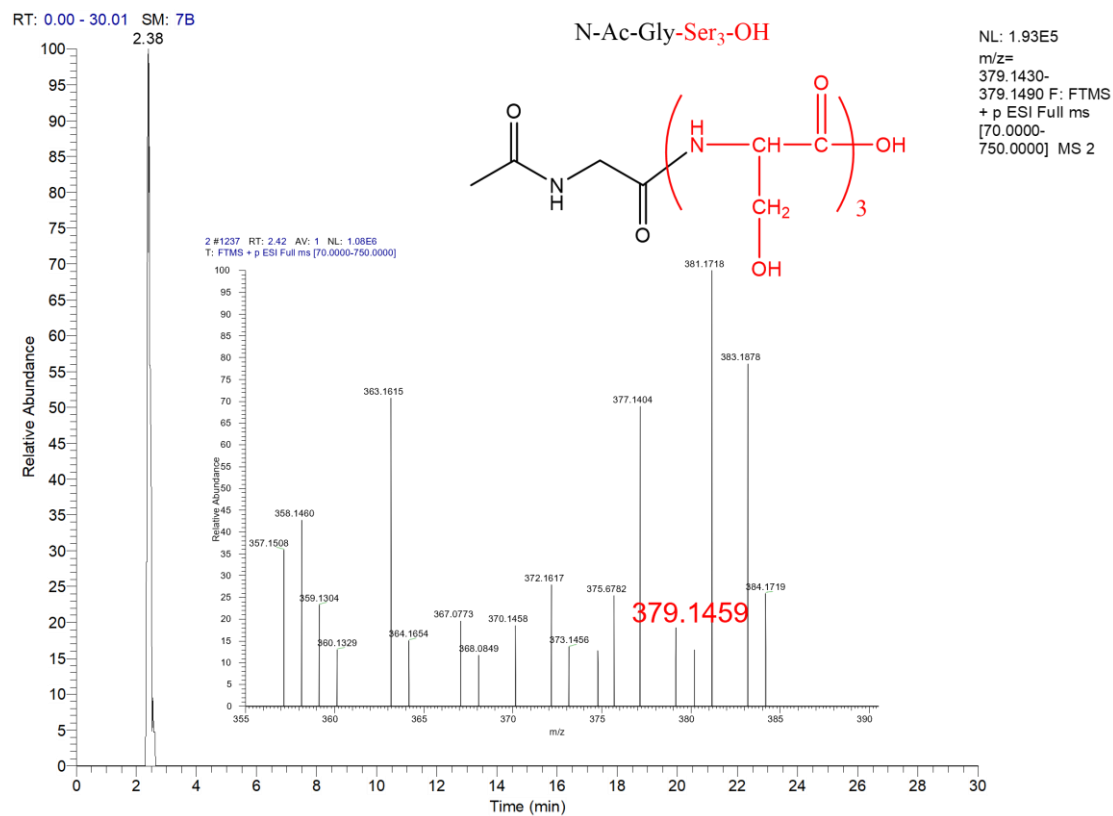

Fig. S110 Extraction ion chromatography-mass spectrometry analysis of the product. The EIC of m/z 379.1459 was analyzed, and its EIC corresponded to the tetrapeptide N-Ac-Gly-Ser<sub>3</sub>-OH with a retention time of 2.42 min.

2.24 Oligomer produced by the polymerization of 0.1 M Ac-Gly-NH<sub>2</sub> and 0.1 M Val-NH<sub>2</sub>. (Figs. S111-S116)

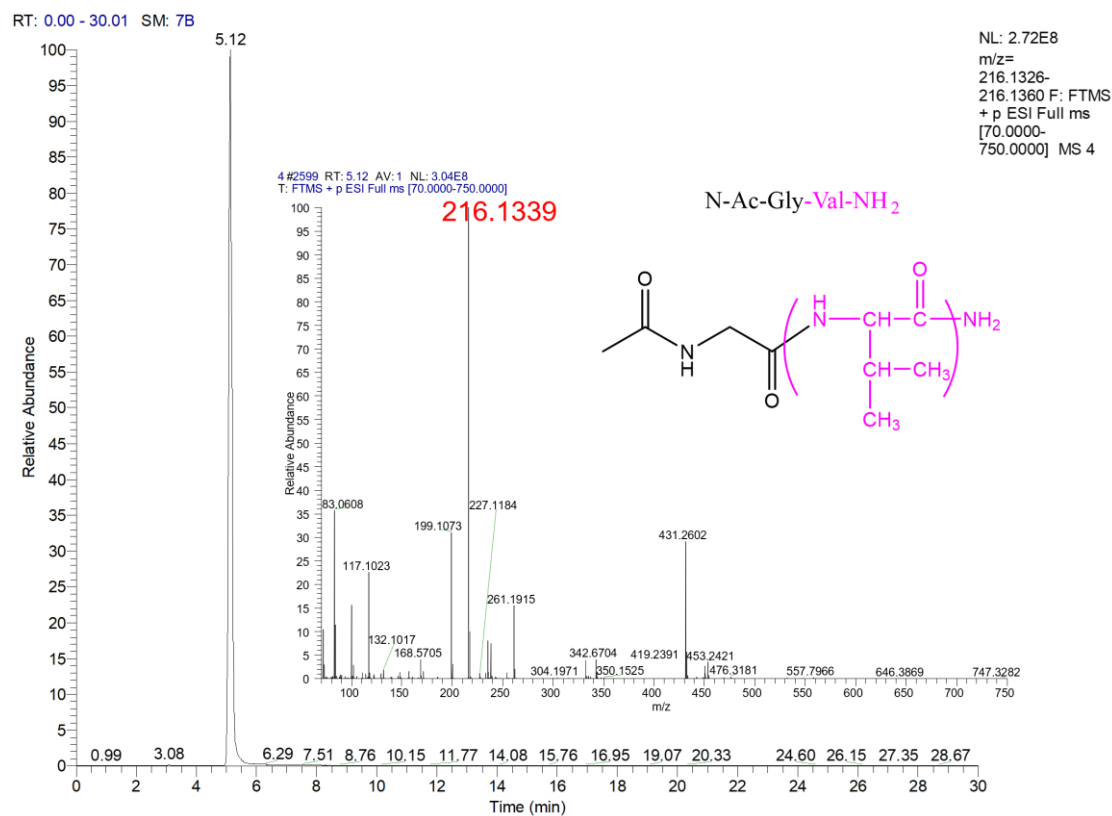

Fig. S111 Extraction ion chromatography-mass spectrometry analysis of the product. The EIC of m/z 216.1339 was analyzed and its EIC corresponded to the dimer N-Ac-Gly-Val-NH<sub>2</sub> with a retention time of 5.12 min.

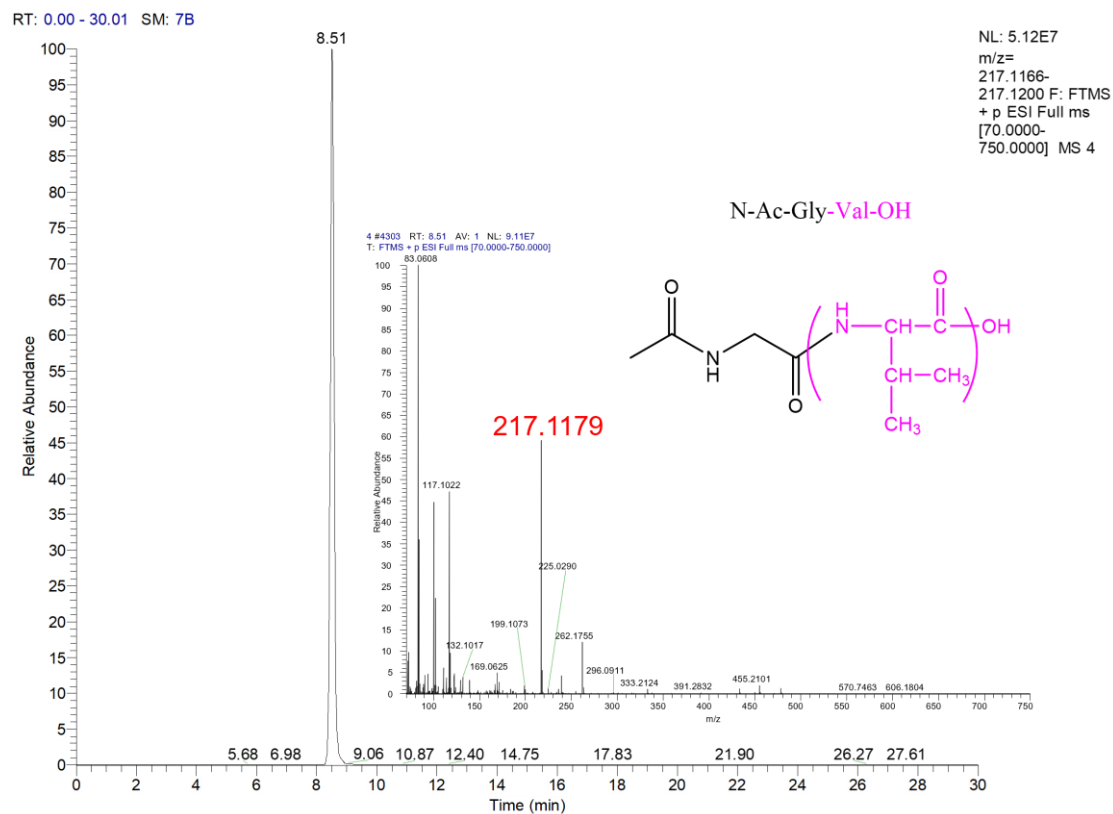

Fig. S112 Extraction ion chromatography-mass spectrometry analysis of the product. The EIC of m/z 217.1179 was analyzed and its EIC corresponded to the dipeptide N-Ac-Gly-Val-OH with a retention time of 8.51 min.



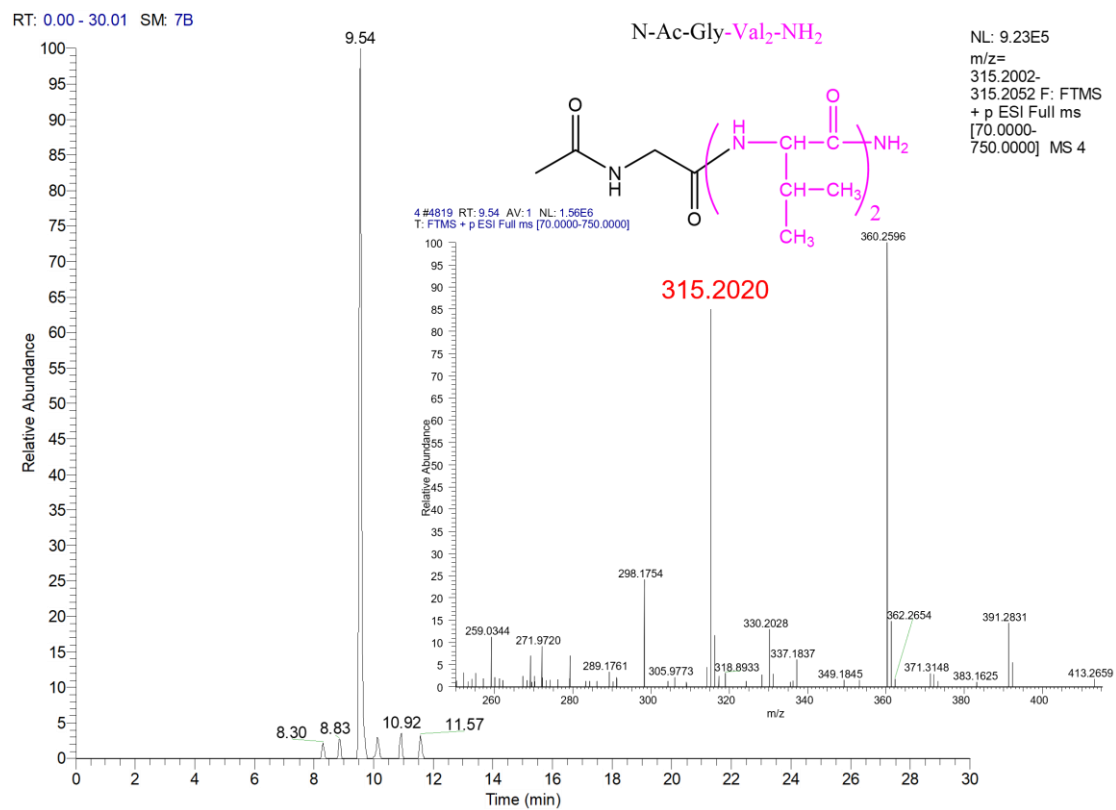

Fig. S113 Extraction ion chromatography-mass spectrometry analysis of the product. The EIC of m/z 315.2020 was analyzed and its EIC corresponds to the trimer N-Ac-Gly-Val<sub>2</sub>-NH<sub>2</sub> with a retention time of 9.54 min.

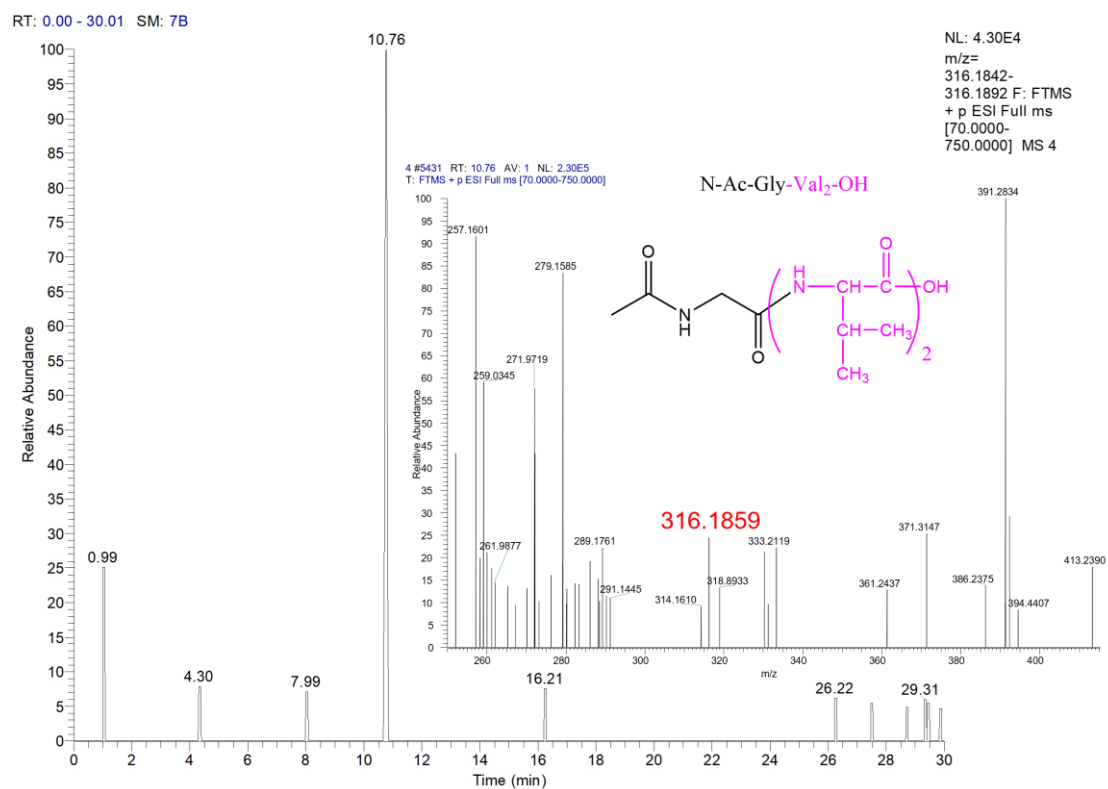

Fig. S114 Extraction ion chromatography-mass spectrometry analysis of the product. The EIC of m/z 316.1859 was analyzed and its EIC corresponded to the tripeptide N-Ac-Gly-Val<sub>2</sub>-OH with a retention time of 10.76 min.

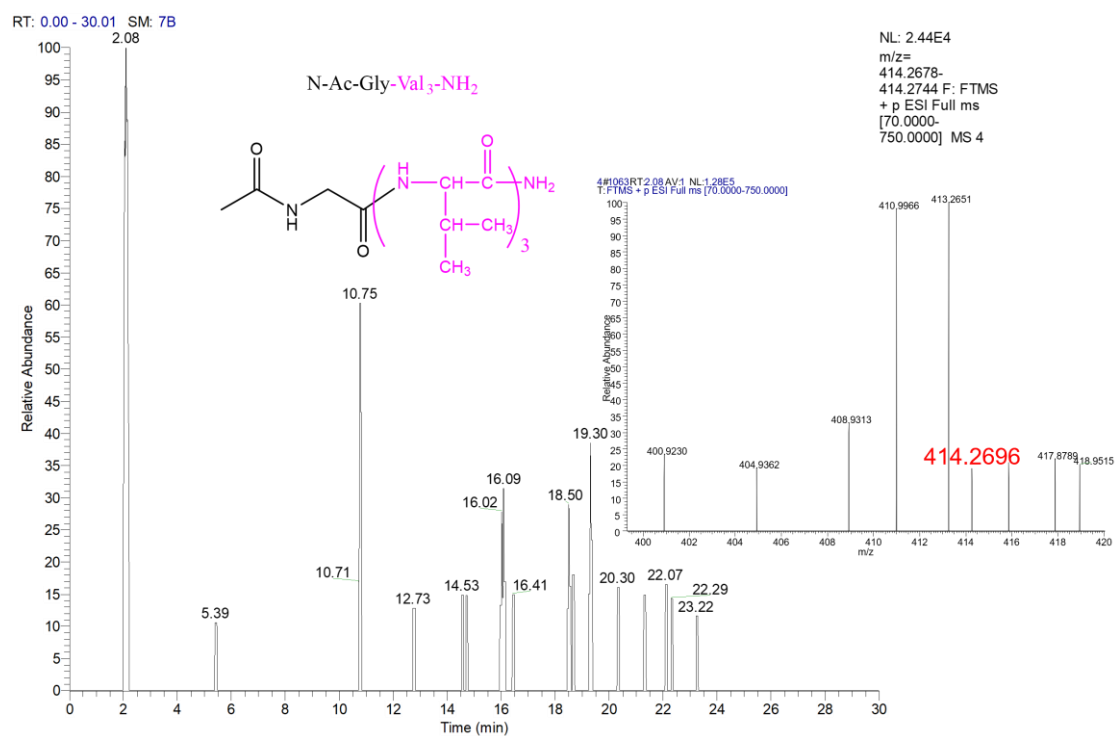

Fig. S115 Extraction ion chromatography-mass spectrometry analysis of the product. The EIC of  $m/z$  414.2696 was analyzed and its EIC corresponded to the tetramer N-Ac-Gly-Val<sub>3</sub>-NH<sub>2</sub> with a retention time of 2.08 min.

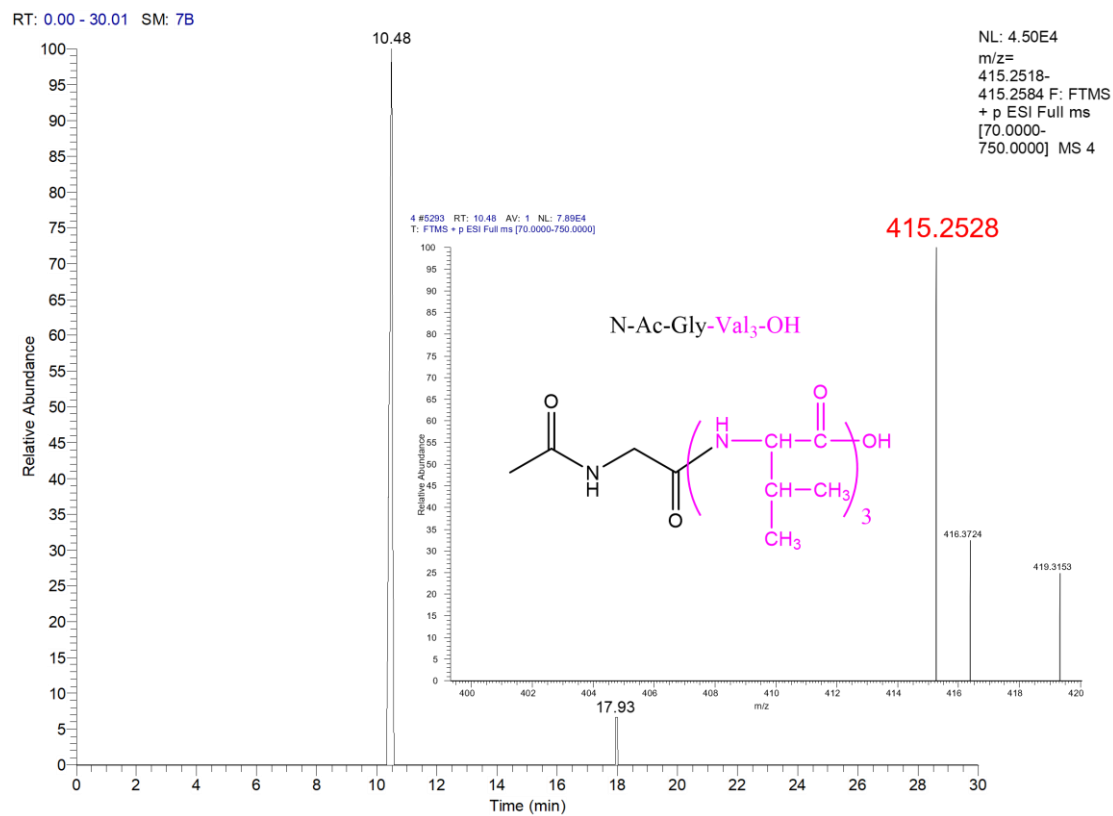

Fig. S116 Extraction ion chromatography-mass spectrometry analysis of the product. The EIC of m/z 415.2528 was analyzed and its EIC corresponded to the tetrapeptide N-Ac-Gly-Val<sub>3</sub>-OH with a retention time of 10.48 min.

2.25 Oligomer produced by the polymerization of 0.1 M Ac-Gly-NH<sub>2</sub> and 0.1 M Arg-NH<sub>2</sub>. (Figs. S117-S119)

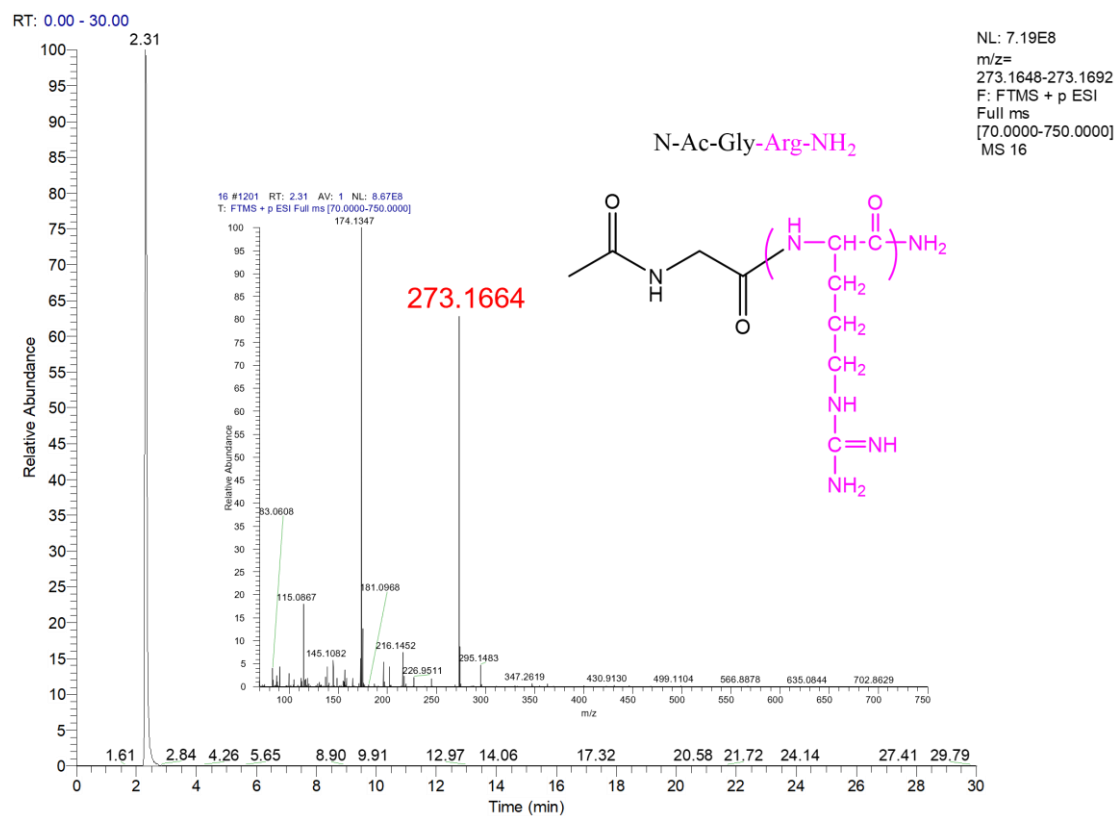

Fig. S117 Extraction ion chromatography-mass spectrometry analysis of the product. The EIC of m/z 273.1664 was analyzed and its EIC corresponded to the dimer N-Ac-Gly-Arg-NH<sub>2</sub> with a retention time of 2.31 min.

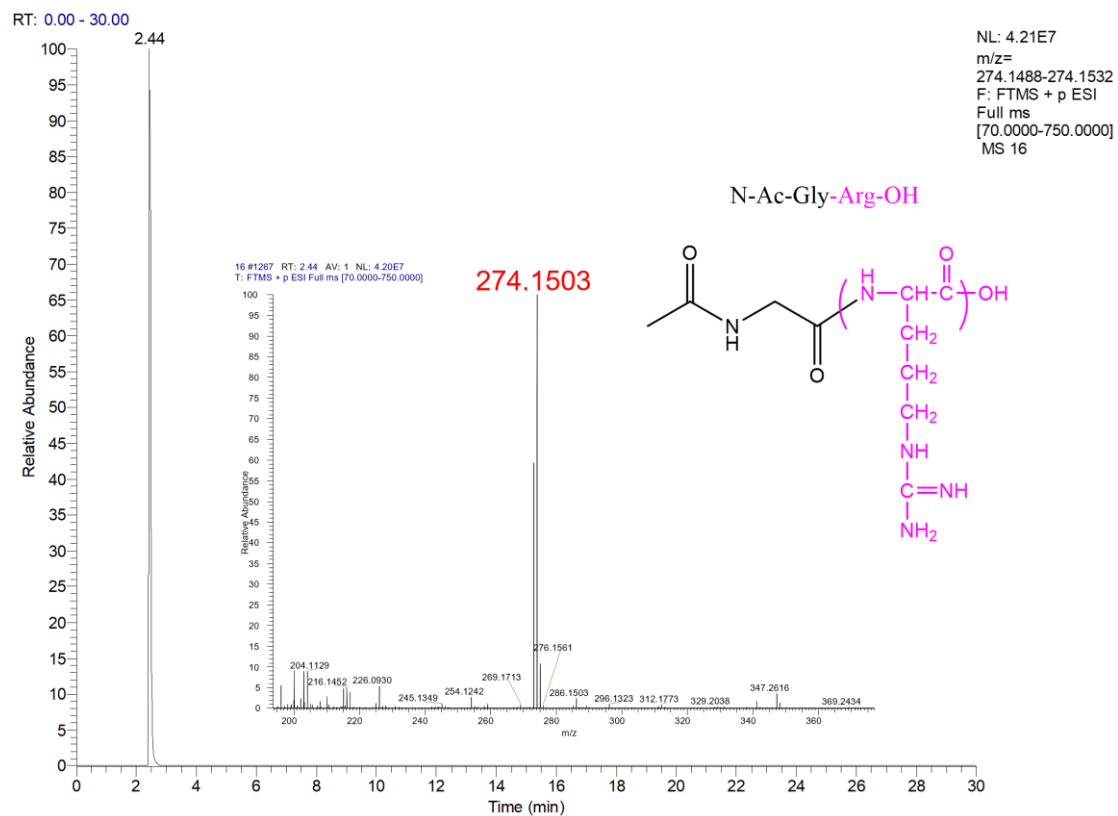

Fig. S118 Extraction ion chromatography-mass spectrometry analysis of the product. The EIC of m/z 274.1503 was analyzed and its EIC corresponded to the dipeptide N-Ac-Gly-Arg-OH with a retention time of 2.44 min.

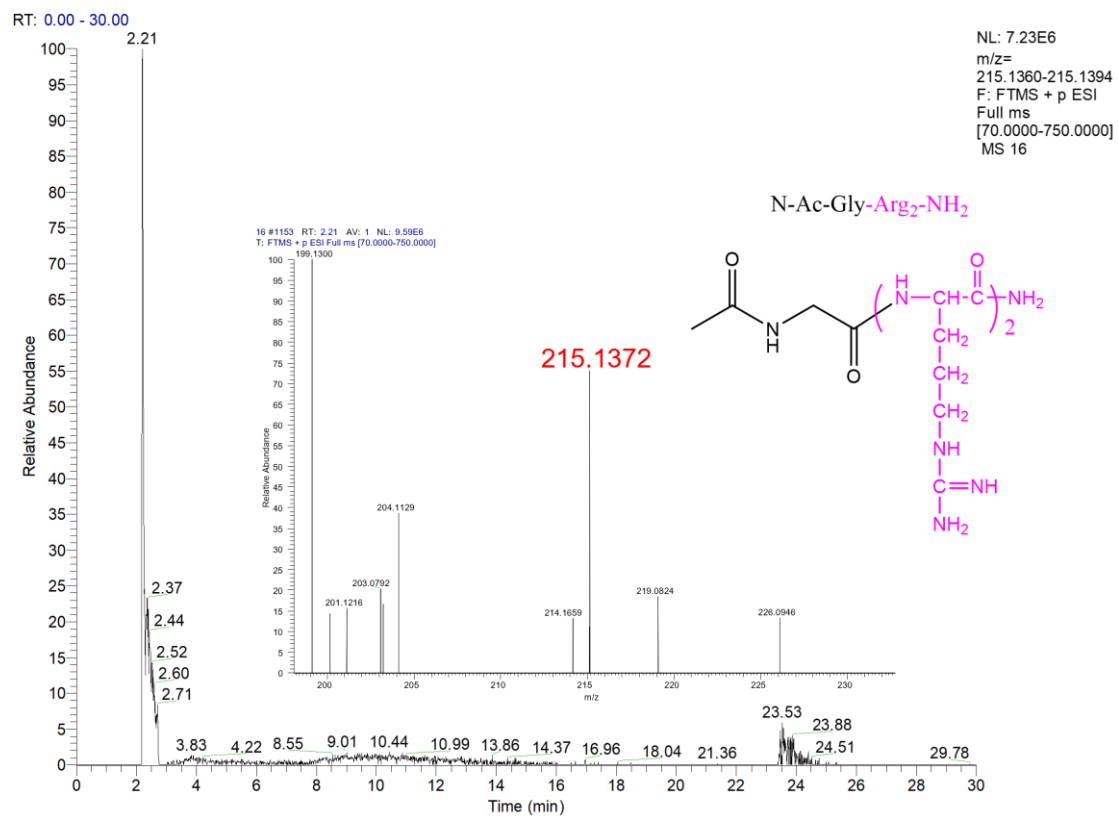

Fig. S119 Extraction ion chromatography-mass spectrometry analysis of the product. The EIC of m/z 215.1372 was analyzed and its EIC corresponded to the trimer N-Ac-Gly-Arg<sub>2</sub>-NH<sub>2</sub> with a retention time of 2.21 min.

2.26 Oligomer produced by the polymerization of 0.1 M Ac-Gly-NH<sub>2</sub> and 0.1 M Lys-NH<sub>2</sub>. (Figs. S120-S122)

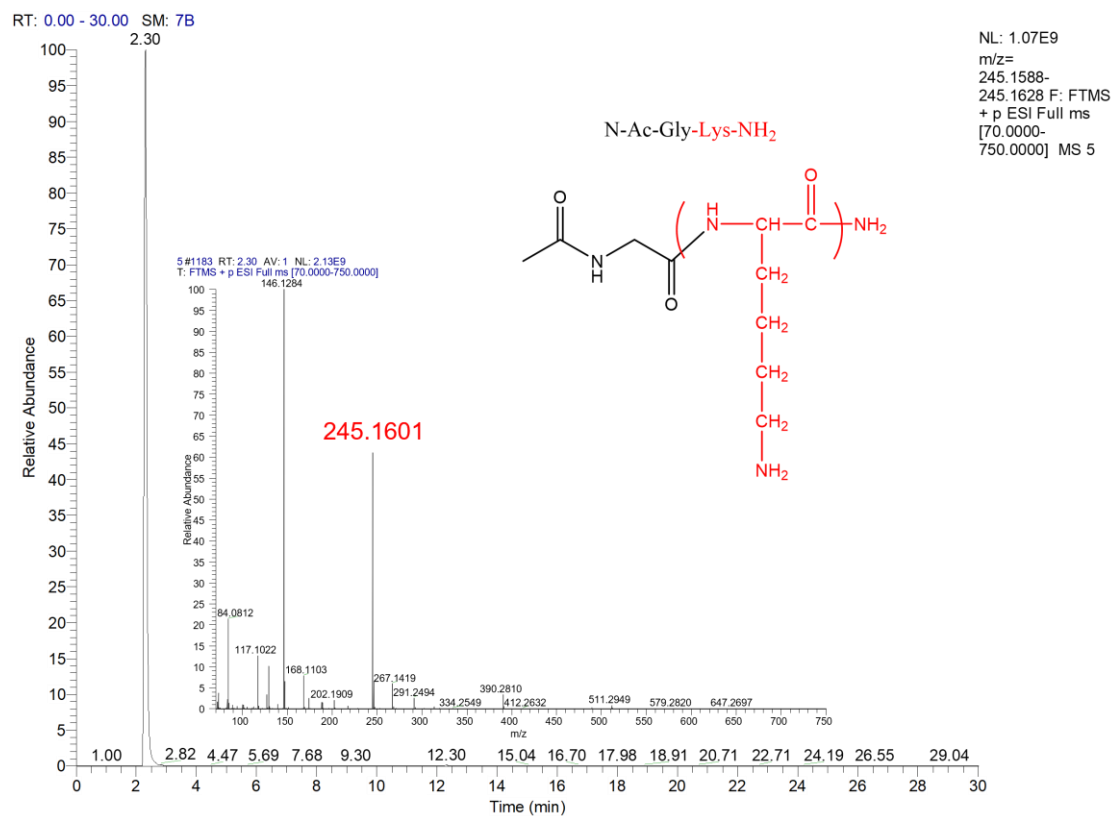

Fig. S120 Extraction ion chromatography-mass spectrometry analysis of the product. The EIC of m/z 245.1601 was analyzed and its EIC corresponded to the dimer N-Ac-Gly-Lys-NH<sub>2</sub> with a retention time of 2.30 min.



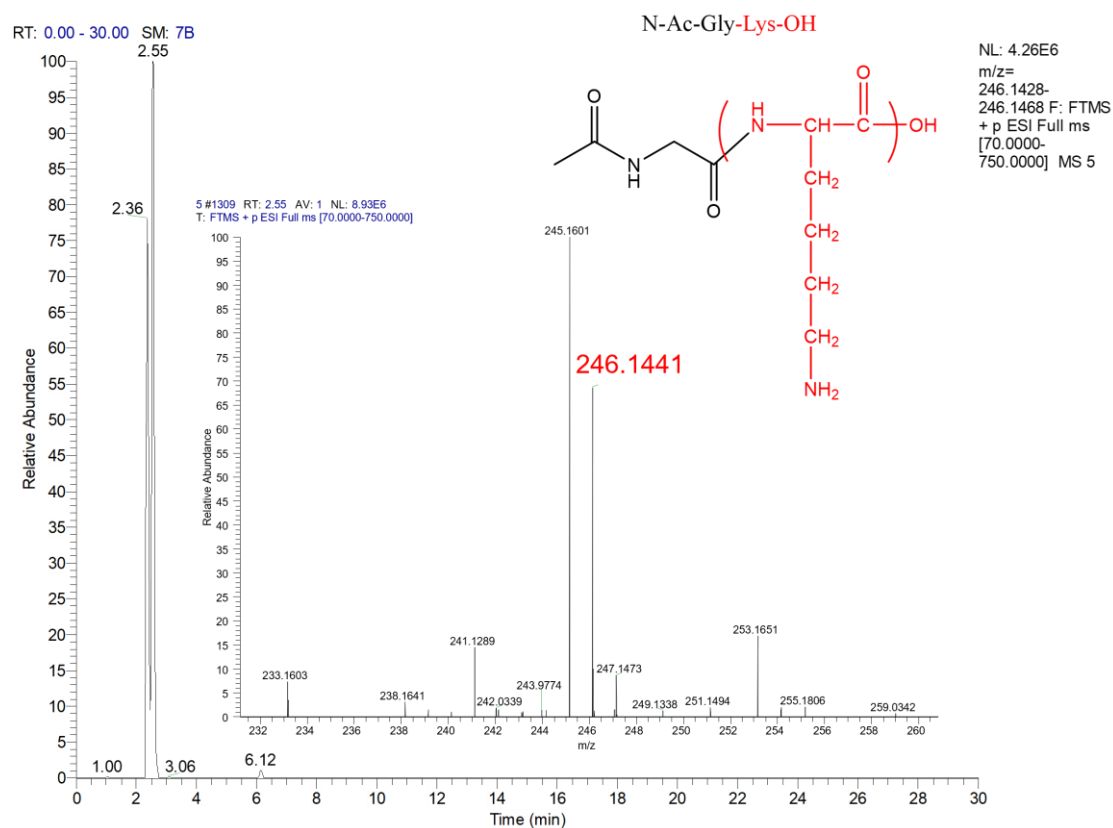

Fig. S121 Extraction ion chromatography-mass spectrometry analysis of the product. The EIC of m/z 246.1441 was analyzed and its EIC corresponded to the dipeptide N-Ac-Gly-Lys-OH with a retention time of 2.55 min.

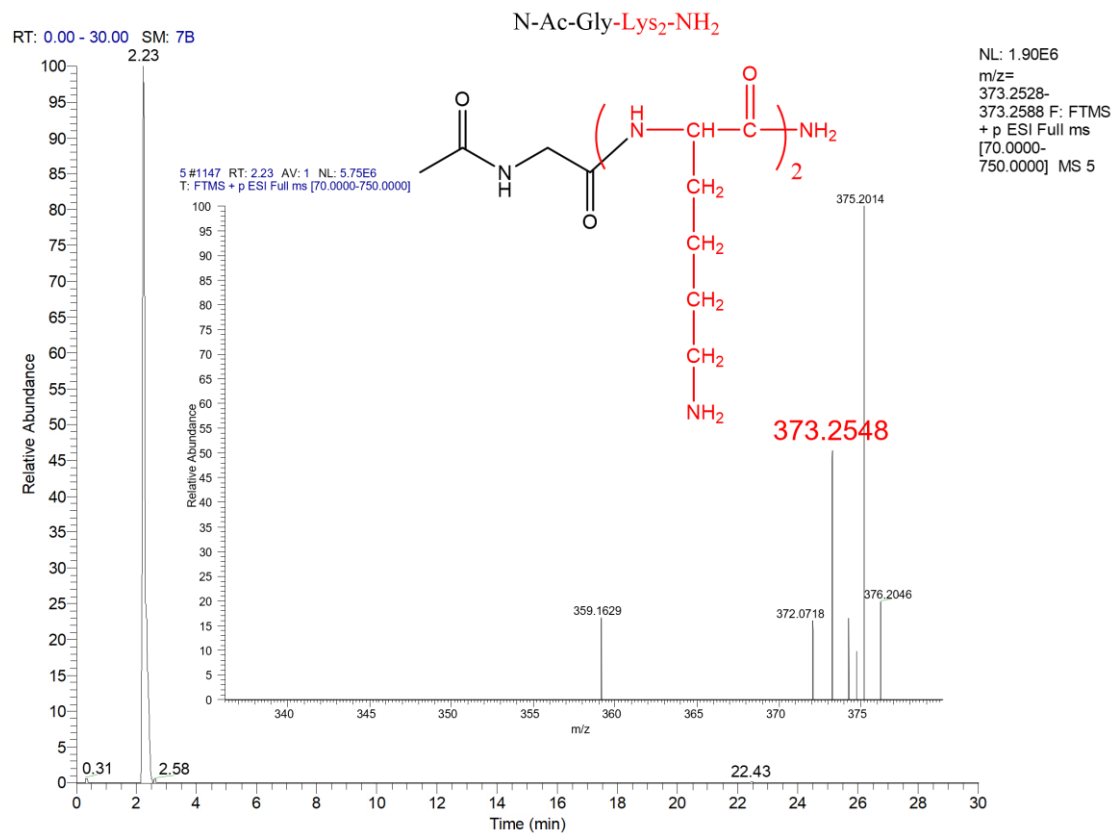

Fig. S122 Extraction ion chromatography-mass spectrometry analysis of the product. The EIC of m/z 373.2548 was analyzed and its EIC corresponded to the trimer N-Ac-Gly-Lys<sub>2</sub>-NH<sub>2</sub> with a retention time of 2.23 min.

2.27 Oligomer produced by the polymerization of 0.1 M Ac-Gly-NH<sub>2</sub> and 0.1 M Leu-NH<sub>2</sub>. (Figs. S123-S127)

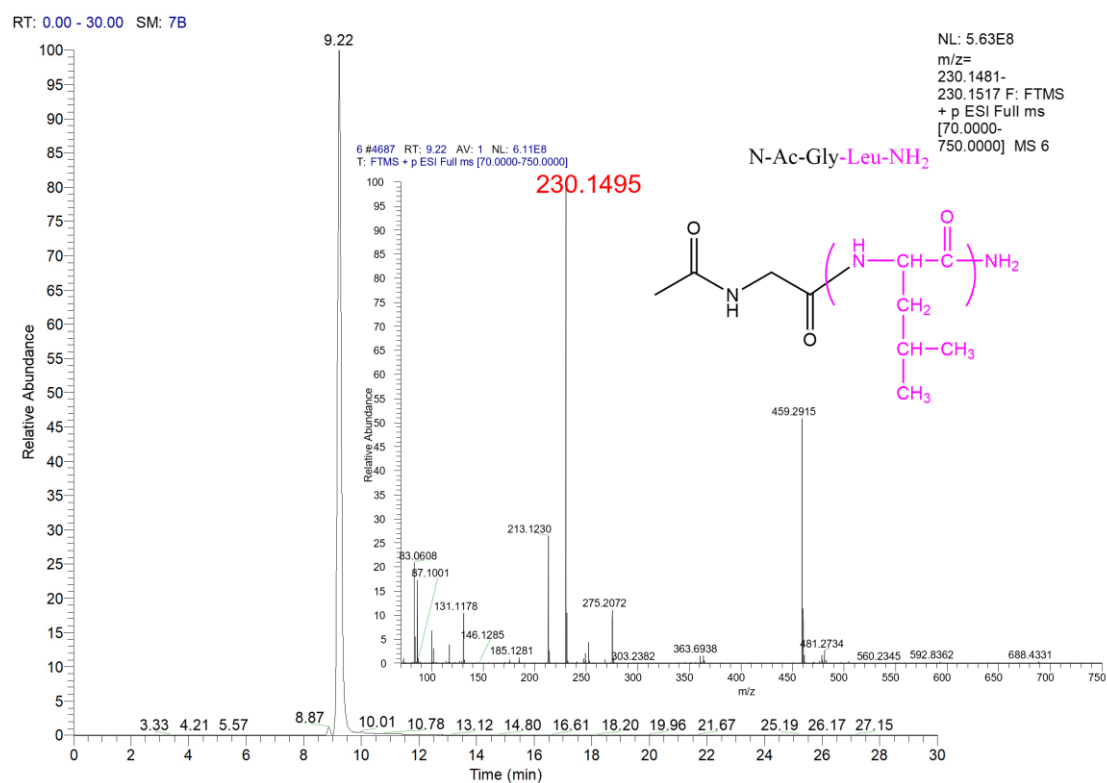

Fig. S123 Extraction ion chromatography-mass spectrometry analysis of the product. The EIC of m/z 230.1495 was analyzed and its EIC corresponded to the dimer N-Ac-Gly-Leu-NH<sub>2</sub> with a retention time of 9.22 min.

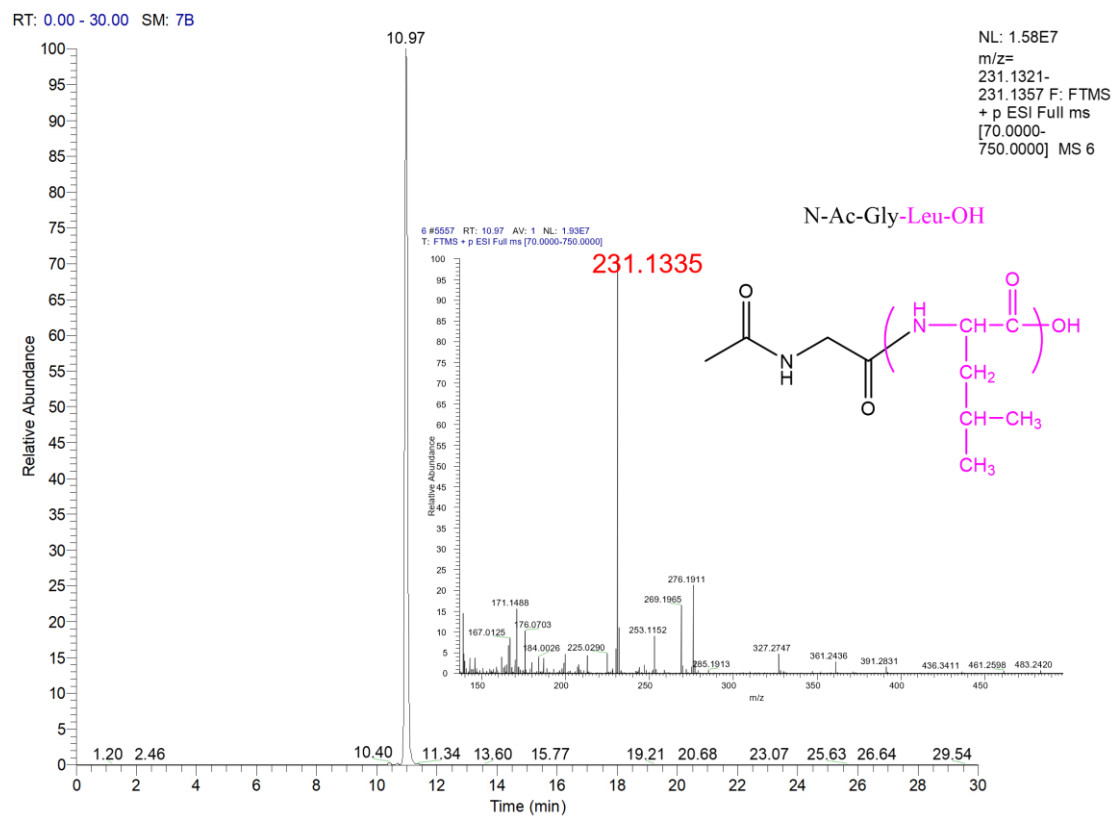

Fig. S124 Extraction ion chromatography-mass spectrometry analysis of the product. The EIC of m/z 231.1335 was analyzed and its EIC corresponded to the dipeptide N-Ac-Gly-Leu-OH with a retention time of 10.97 min.

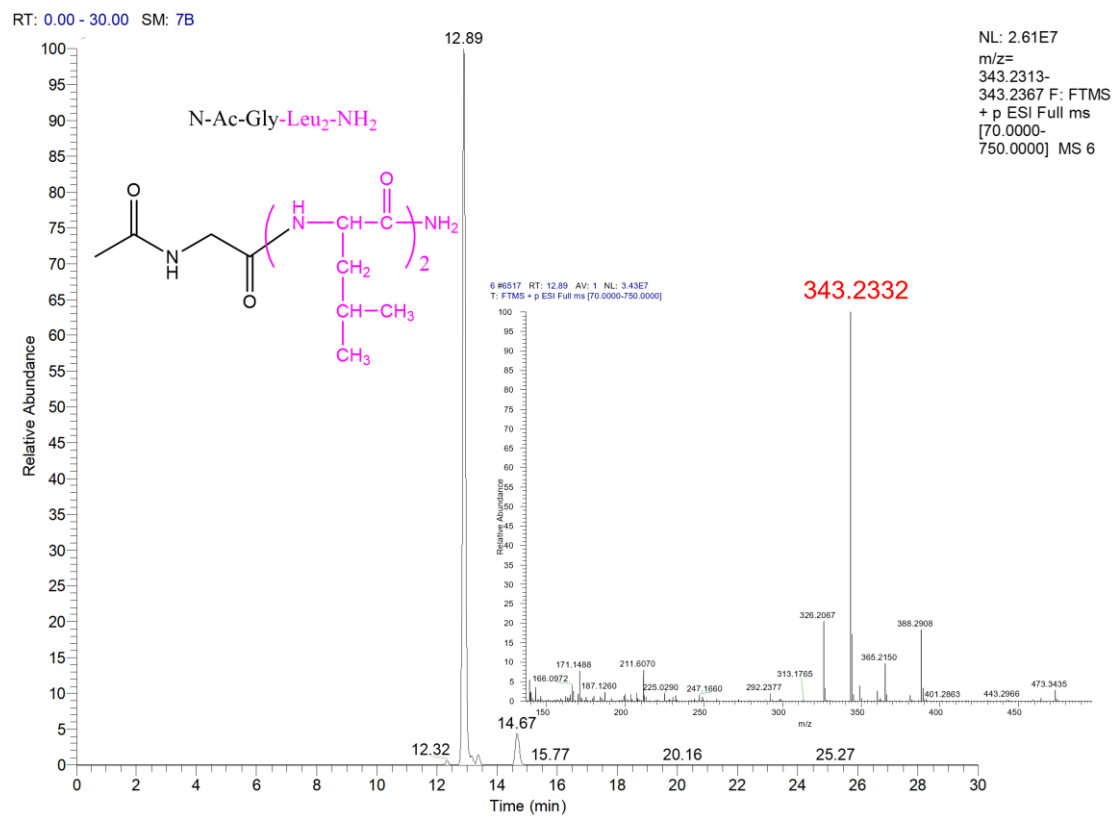

Fig. S125 Extraction ion chromatography-mass spectrometry analysis of the product. The EIC of m/z 343.2332 was analyzed and its EIC corresponded to the trimer N-Ac-Gly-Leu<sub>2</sub>-NH<sub>2</sub> with a retention time of 12.89 min.

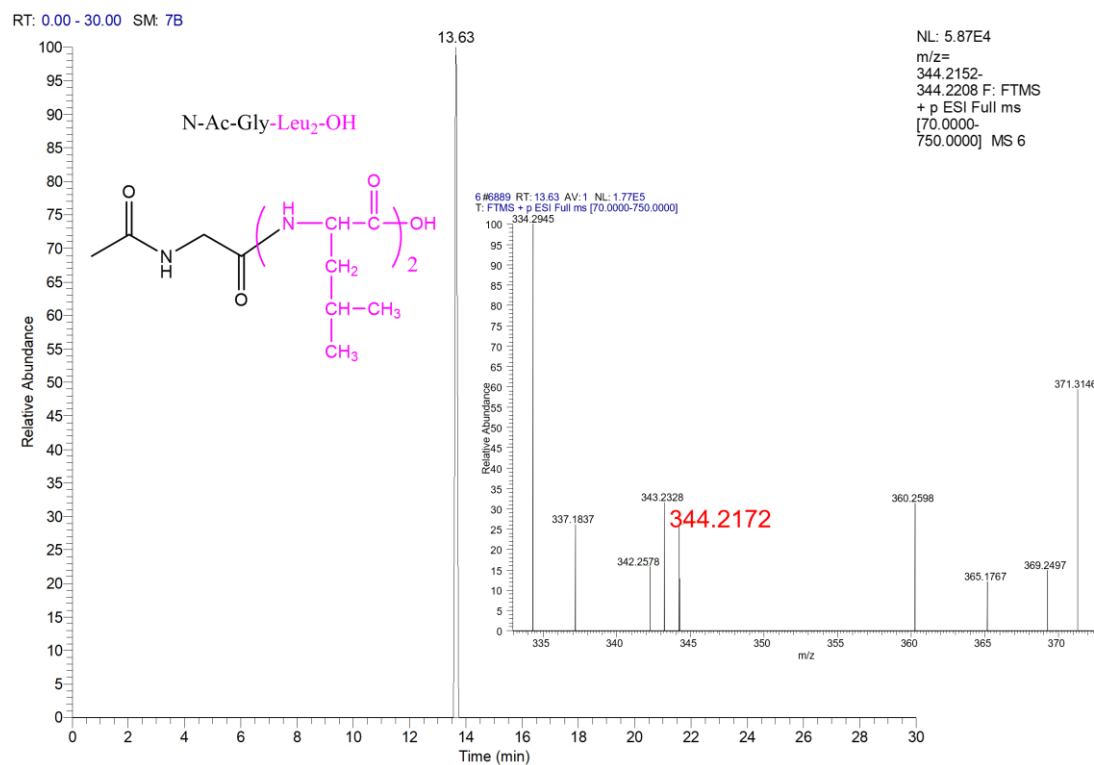

Fig. S126 Extraction ion chromatography-mass spectrometry analysis of the product. The EIC of m/z 344.2172 was analyzed and its EIC corresponded to the tripeptide N-Ac-Gly-Leu<sub>2</sub>-OH with a retention time of 13.63 min.

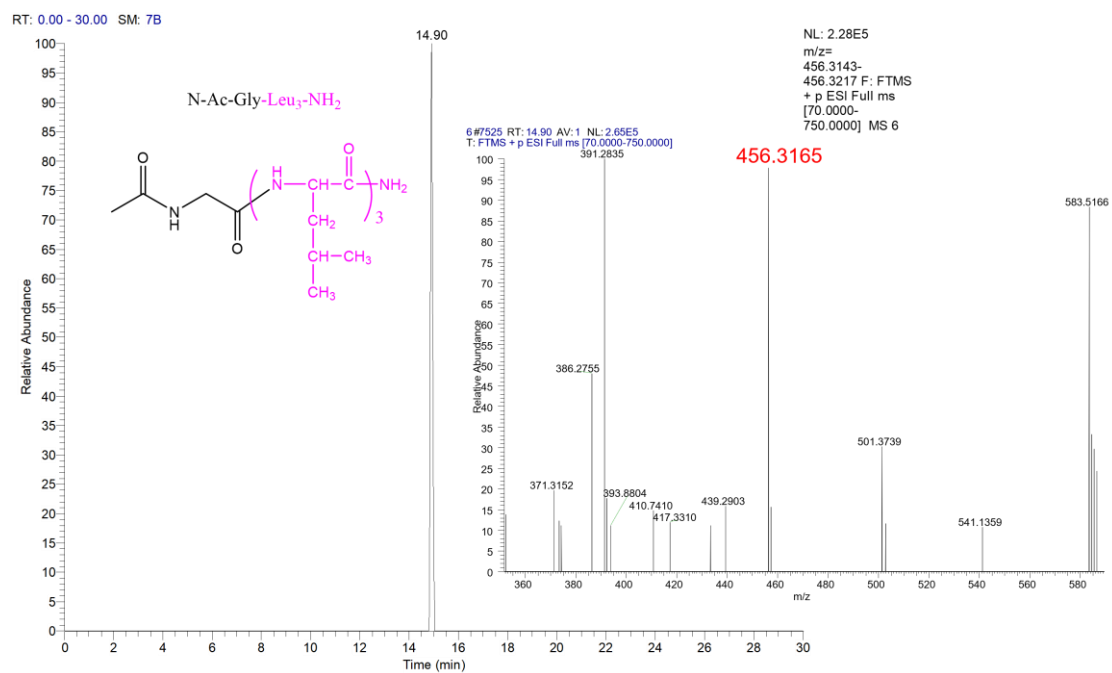

Fig. S127 Extraction ion chromatography-mass spectrometry analysis of the product. The EIC of m/z 456.3165 was analyzed and its EIC corresponded to the tetramer N-Ac-Gly-Leu<sub>3</sub>-NH<sub>2</sub> with a retention time of 14.90 min.

2.28 Oligomer produced by the polymerization of 0.1 M Ac-Gly-NH<sub>2</sub> and 0.1 M Phe-NH<sub>2</sub>. (Figs. S128-S133)

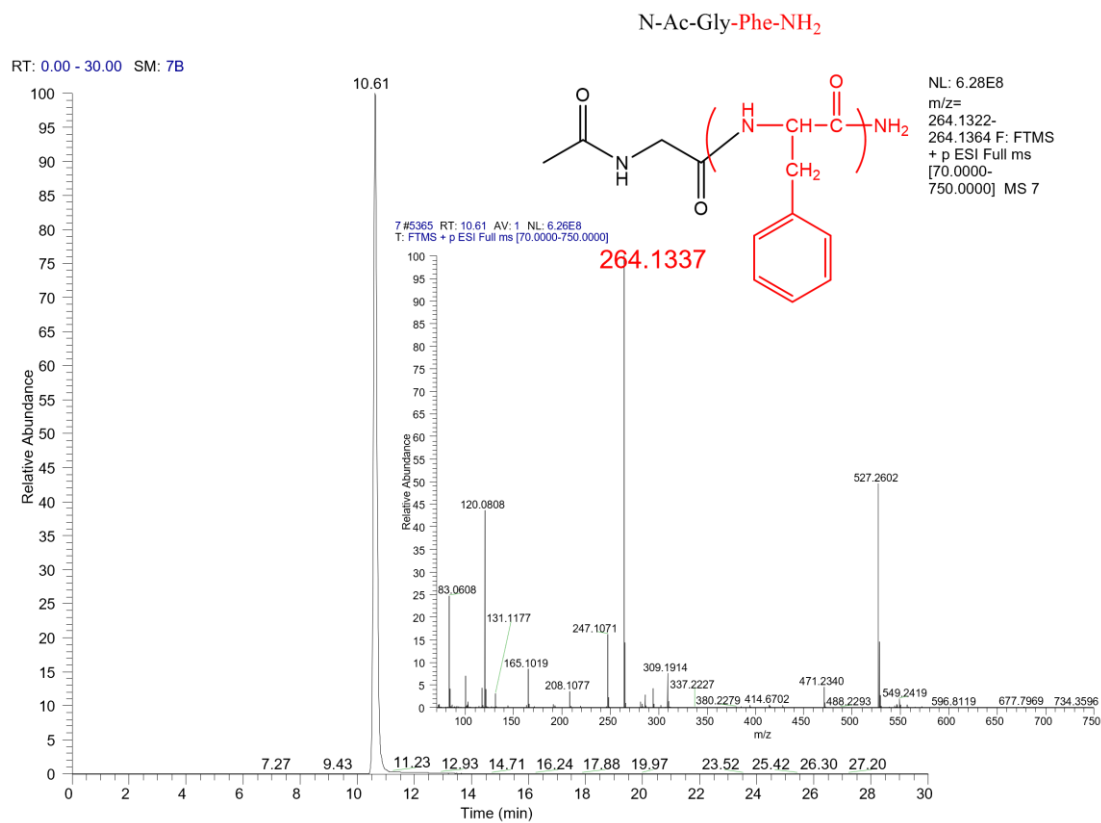

Fig. S128 Extraction ion chromatography-mass spectrometry analysis of the product. The EIC of m/z 264.1337 was analyzed, and its EIC corresponds to the dimer N-ac-Gly-Phe-NH<sub>2</sub> with a retention time of 10.61 min.



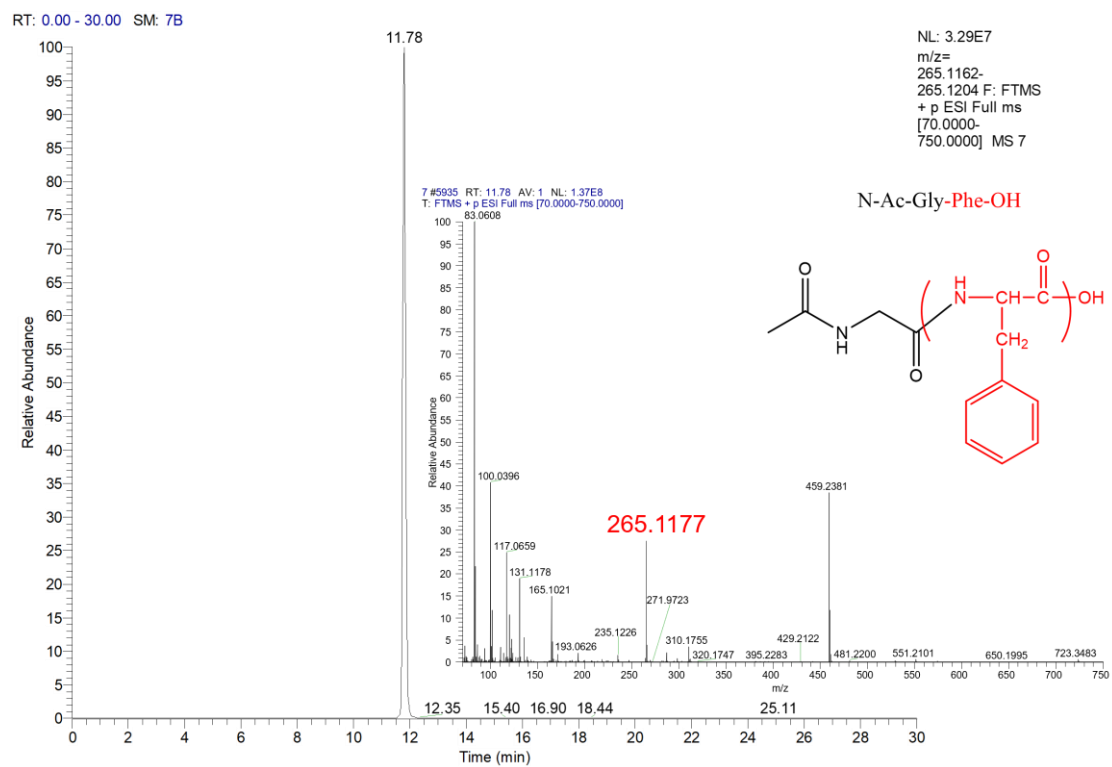

Fig. S129 Extraction ion chromatography-mass spectrometry analysis of the product. The EIC of  $m/z$  265.1177 was analyzed, and its EIC corresponded to the dipeptide N-Ac-Gly-Phe-OH with a retention time of 11.78 min.

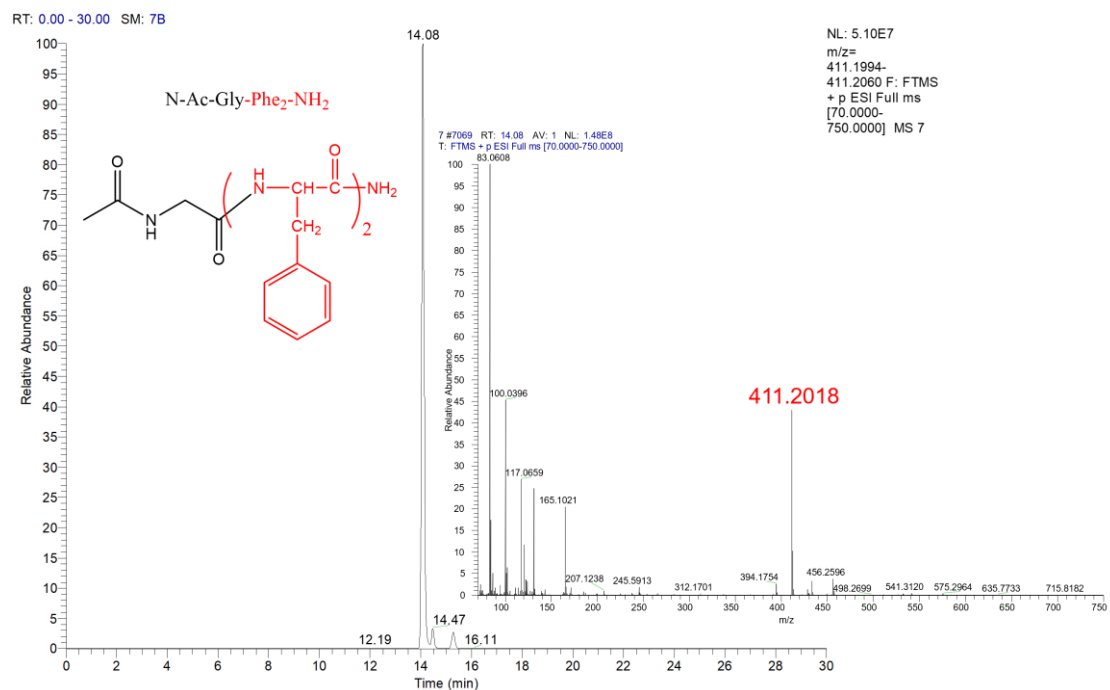

Fig. S130 Extraction ion chromatography-mass spectrometry analysis of the product. The EIC of m/z 411.2018 was analyzed, and its EIC corresponded to the trimer N-Ac-Gly-Phe<sub>2</sub>-NH<sub>2</sub> with a retention time of 14.08 min.

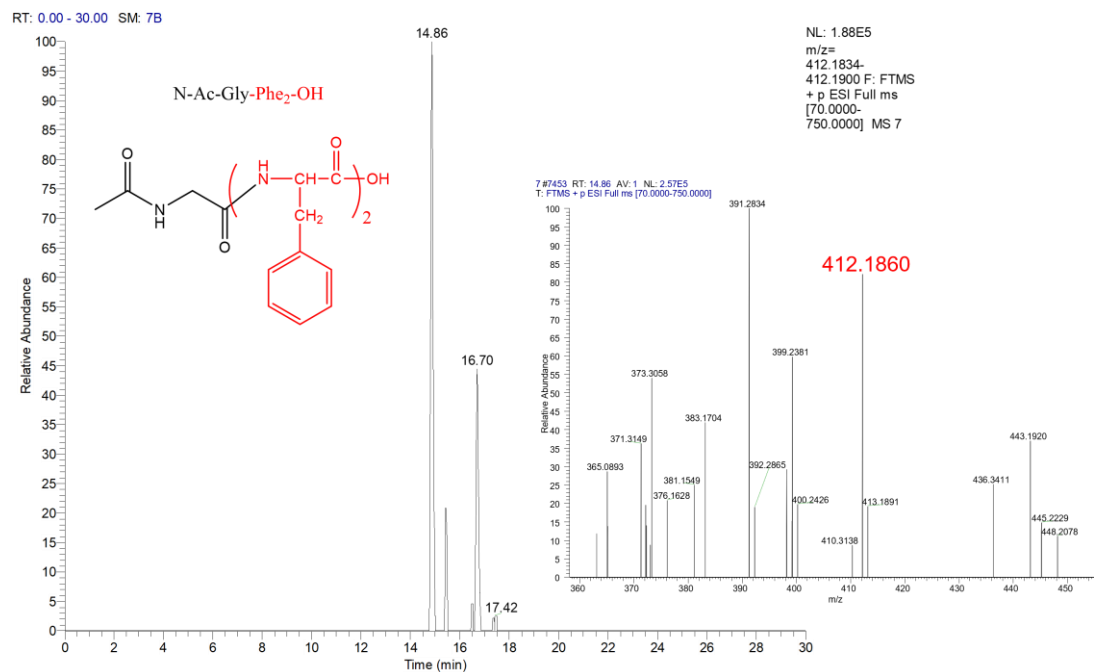

Fig. S131 Extraction ion chromatography-mass spectrometry analysis of the product. The EIC of m/z 412.1860 was analyzed, and its EIC corresponded to the tripeptide N-Ac-Gly-Phe<sub>2</sub>-OH with a retention time of 14.86 min.

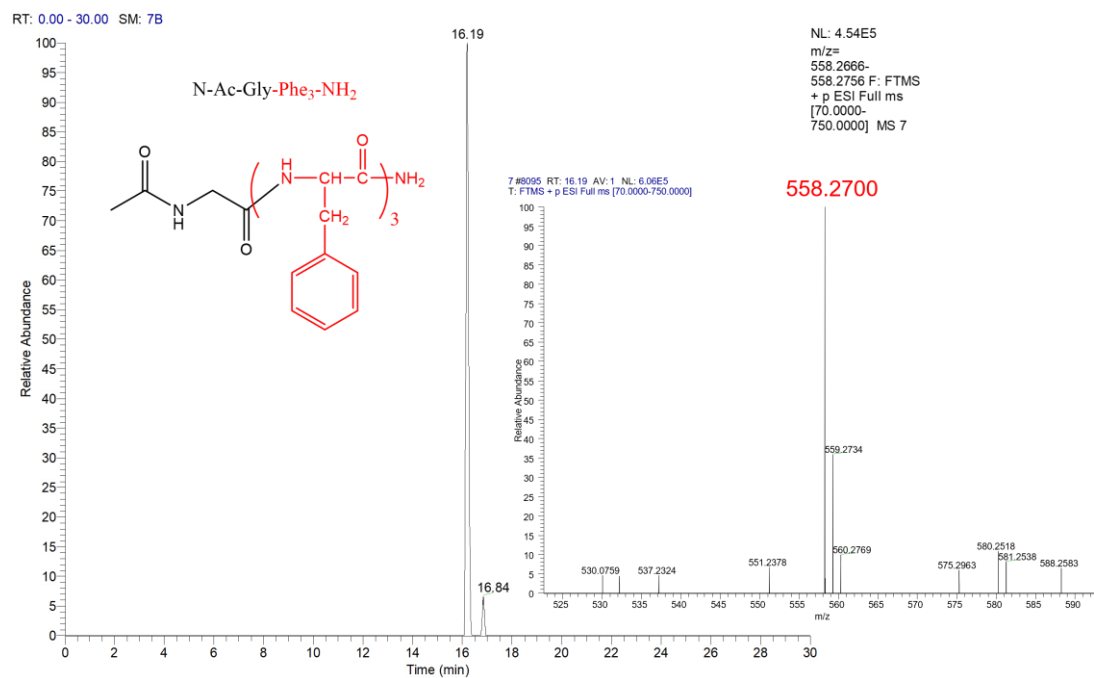

Fig. S132 Extraction ion chromatography-mass spectrometry analysis of the product. The EIC of m/z 558.2700 was analyzed, and its EIC corresponds to the tetramer N-Ac-Gly-Phe<sub>3</sub>-NH<sub>2</sub> with a retention time of 16.19 min.

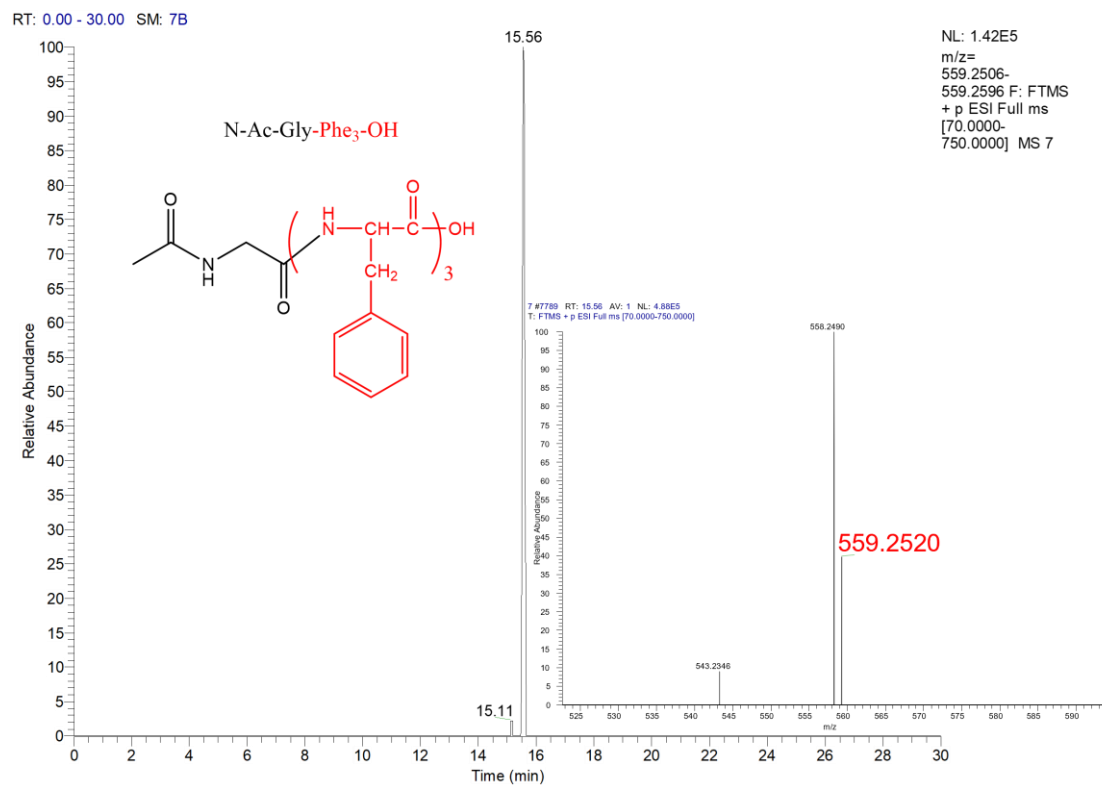

Fig. S133 Extraction ion chromatography-mass spectrometry analysis of the product. The EIC of m/z 559.2520 was analyzed. The EIC corresponds to the tetrapeptide N-Ac-Gly-Phe<sub>3</sub>-OH with a retention time of 15.56 min.

2.29 Oligomer produced by the polymerization of 0.1 M Ac-Gly-NH<sub>2</sub> and 0.1 M Pro-NH<sub>2</sub>. (Figs. S134-S138)

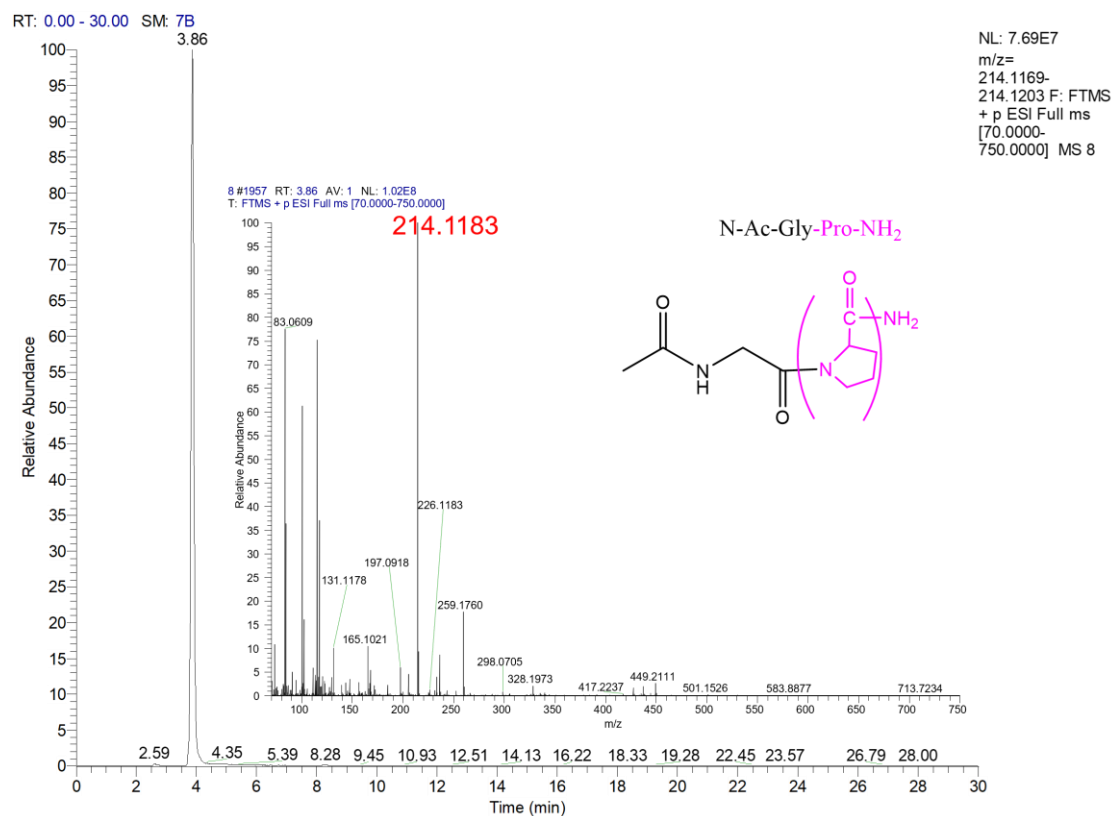

Fig. S134 Extraction ion chromatography-mass spectrometry analysis of the product. The EIC of m/z 214.1183 was analyzed, and its EIC corresponded to the dimer N-Ac-Gly-Pro-NH<sub>2</sub> with a retention time of 3.86 min.

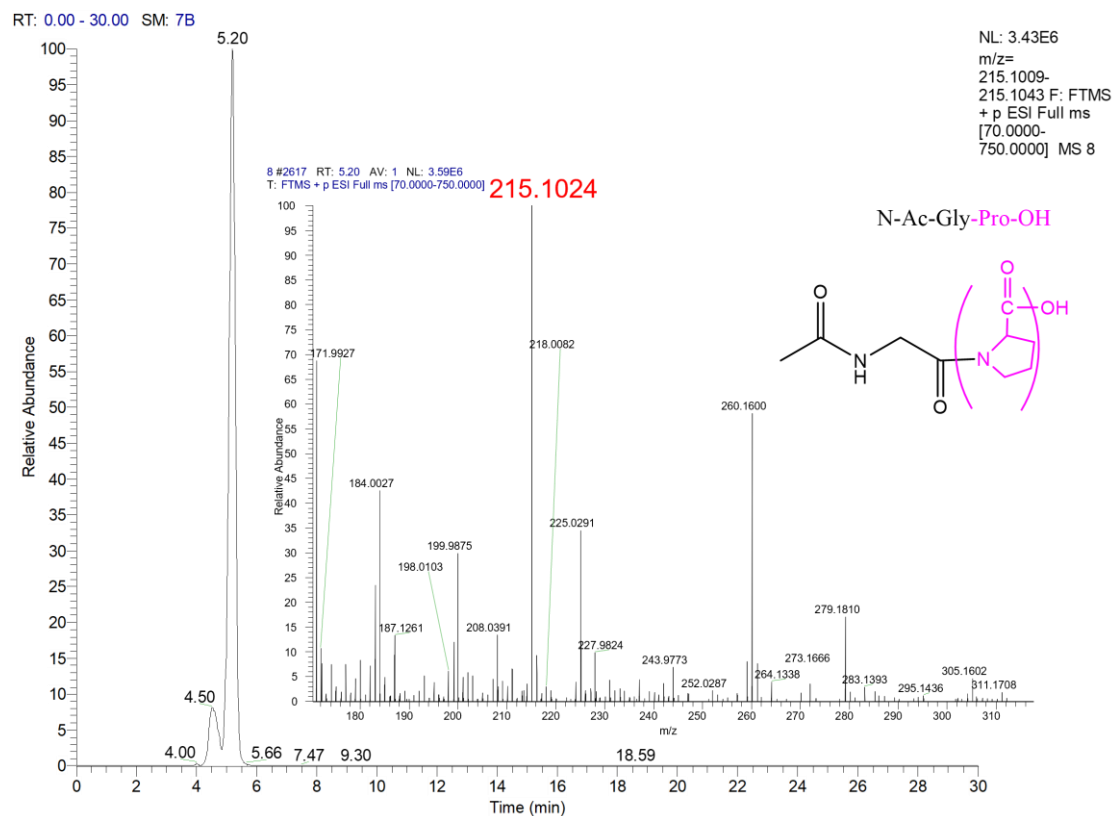

Fig. S135 Extraction ion chromatography-mass spectrometry analysis of the product. The EIC of m/z 215.1024 was analyzed, and its EIC corresponded to the dipeptide N-Ac-Gly-Pro-OH with a retention time of 5.20 min.

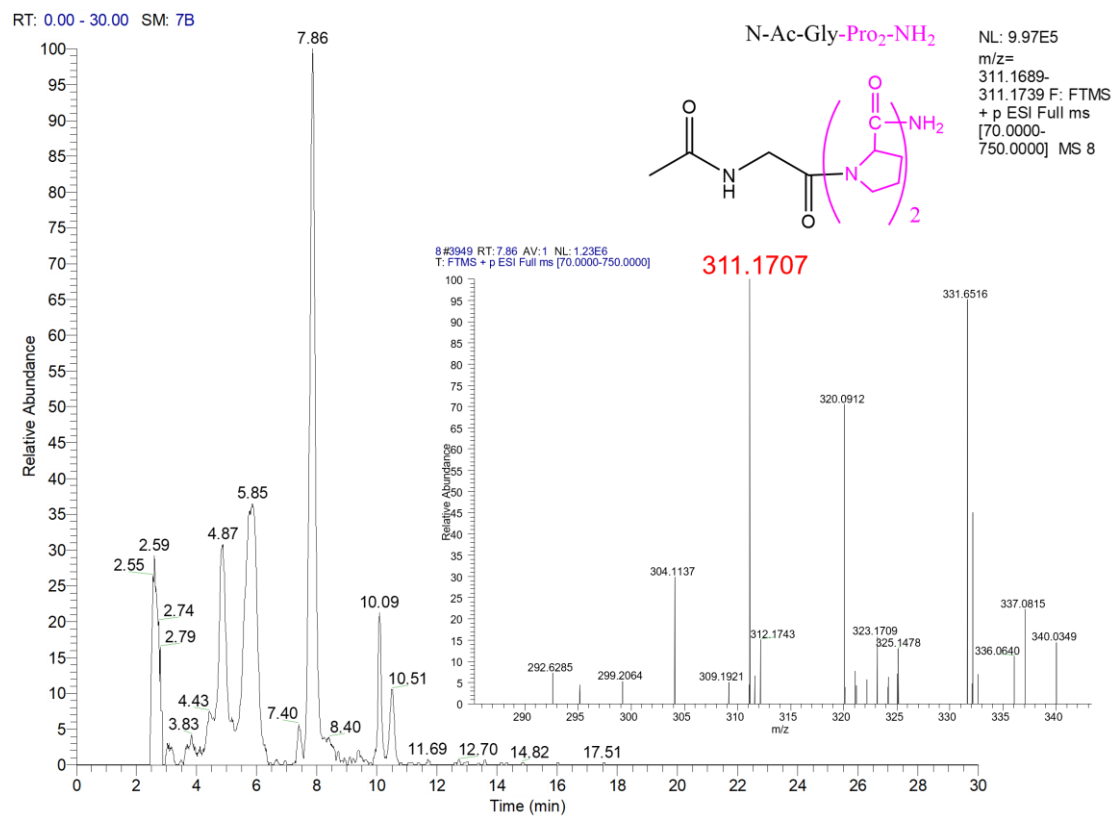

Fig. S136 Extraction ion chromatography-mass spectrometry analysis of the product. The EIC of m/z 311.1707 was analyzed, and its EIC corresponded to the trimer N-Ac-Gly-Pro<sub>2</sub>-NH<sub>2</sub> with a retention time of 7.86 min.



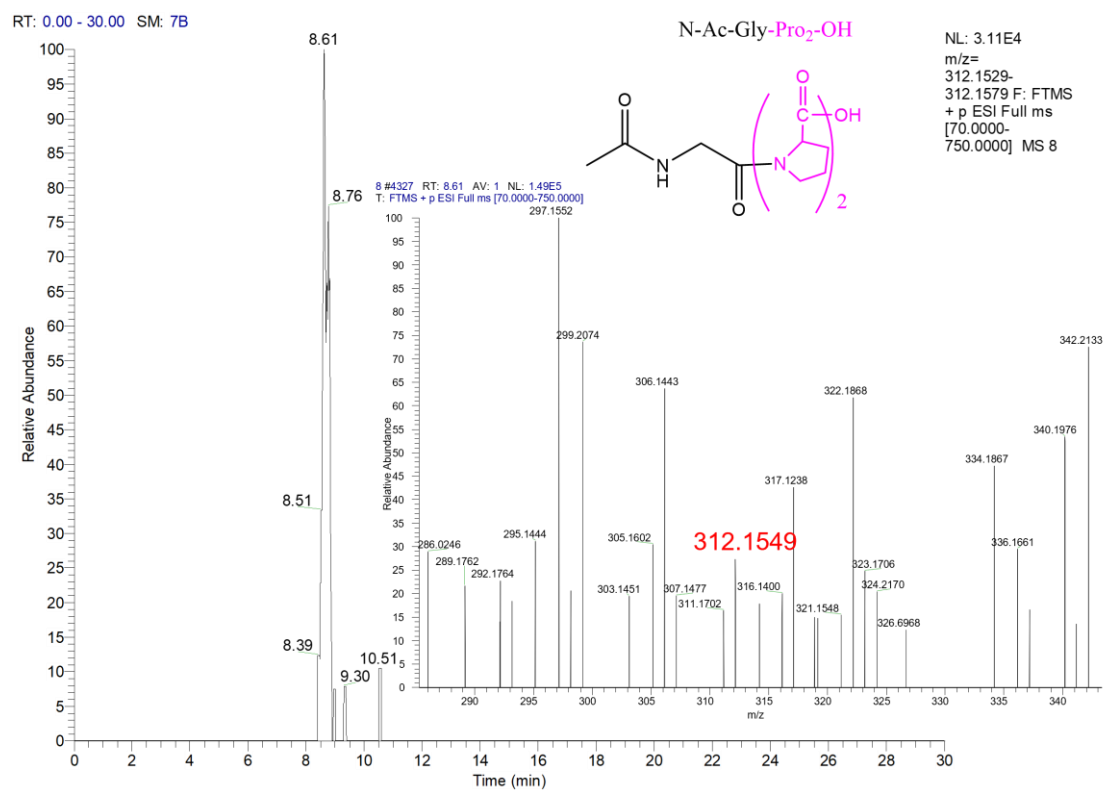

Fig. S137 Extraction ion chromatography-mass spectrometry analysis of the product. The EIC of m/z 312.1549 was analyzed, and its EIC corresponded to the tripeptide N-Ac-Gly-Pro<sub>2</sub>-OH with a retention time of 8.61 min.

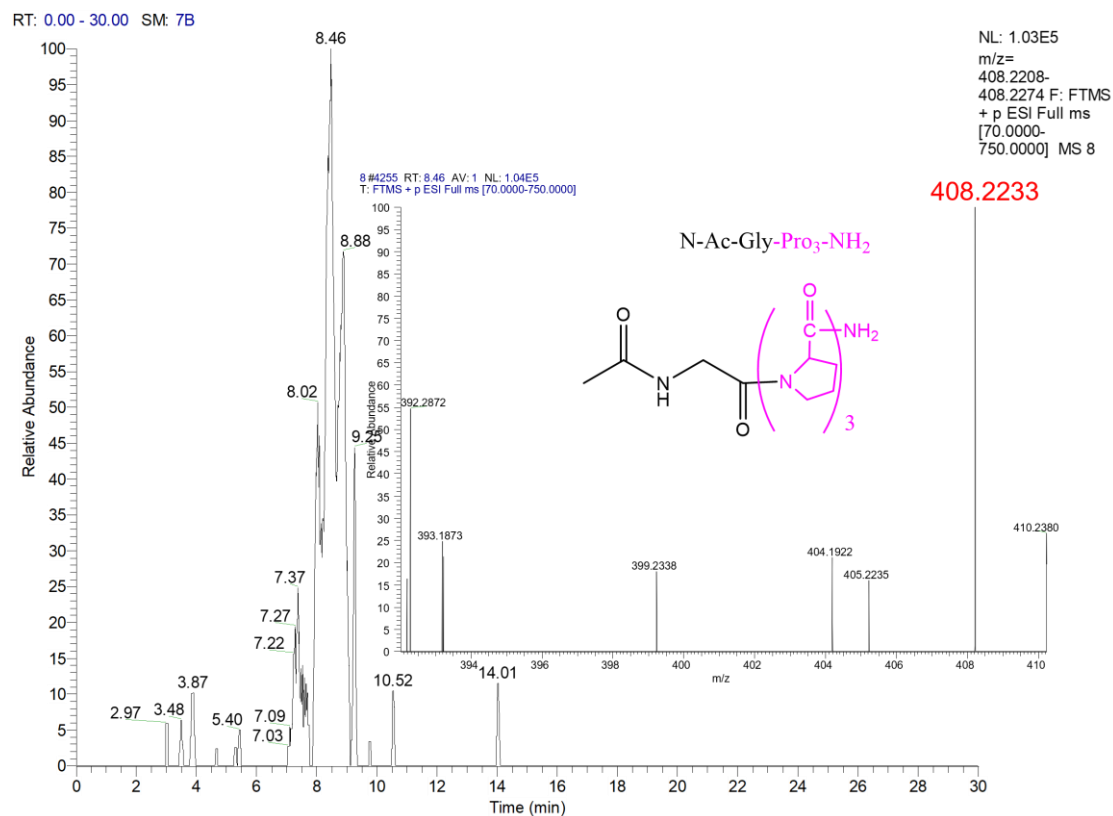

Fig. S138 Extraction ion chromatography-mass spectrometry analysis of the product. The EIC of  $m/z$  408.2233 was analyzed, and its EIC corresponded to the tetramer N-Ac-Gly-Pro<sub>3</sub>-NH<sub>2</sub> with a retention time of 8.46 min.

2.30 Oligomer produced by the polymerization of 0.1 M Ac-Gly-NH<sub>2</sub> and 0.1 M Ile-NH<sub>2</sub>. (Figs. S139-S142)

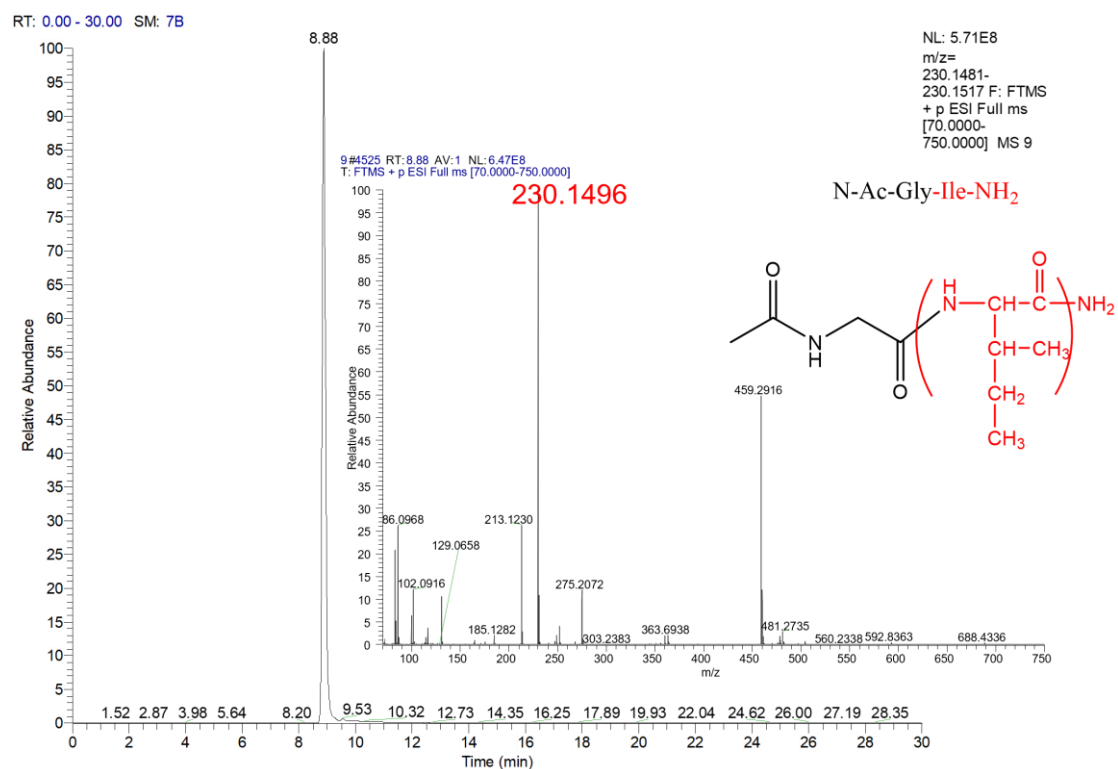

Fig. S139 Extraction ion chromatography-mass spectrometry analysis of the product. The EIC of m/z 230.1496 was analyzed, and its EIC corresponded to the dimer N-Ac-Gly-Ile-NH<sub>2</sub> with a retention time of 8.88 min.

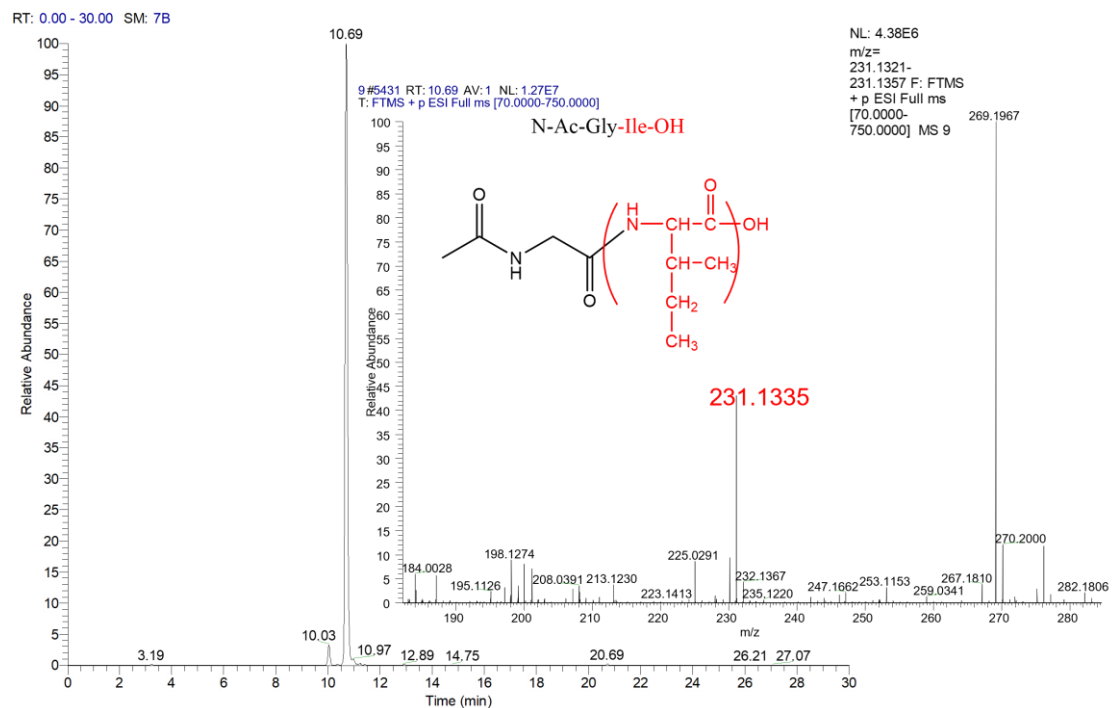

Fig. S140 Extraction ion chromatography-mass spectrometry analysis of the product. The EIC of m/z 231.1335 was analyzed, and its EIC corresponded to the dipeptide N-Ac-Gly-Ile-OH with a retention time of 10.69 min.

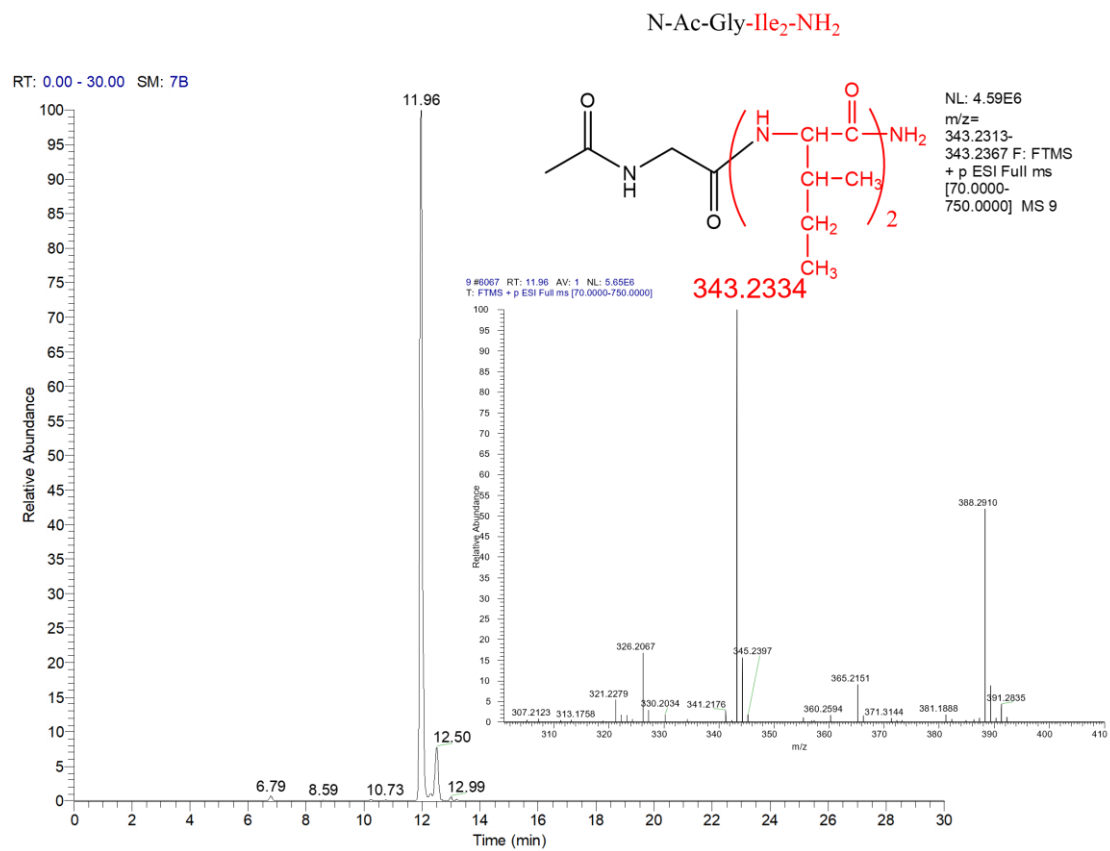

Fig. S141 Extraction ion chromatography-mass spectrometry analysis of the product. The EIC of m/z 343.2334 was analyzed, and its EIC corresponded to the trimer N-Ac-Gly-Ile<sub>2</sub>-NH<sub>2</sub> with a retention time of 11.96 min.

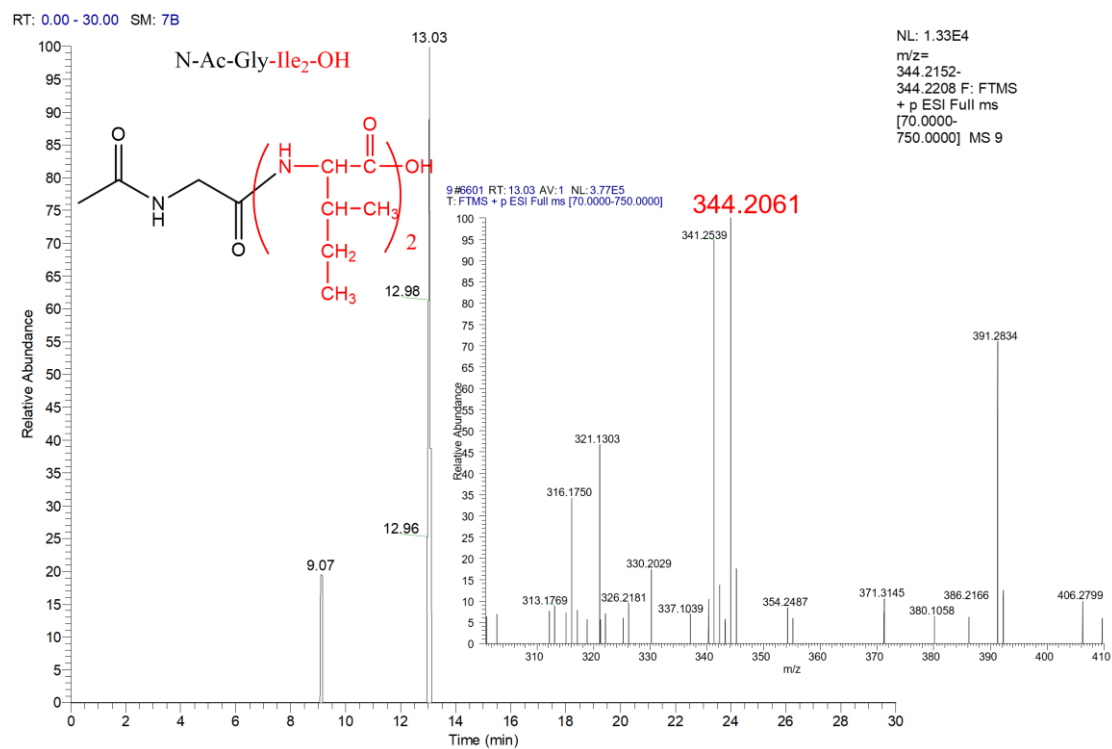

Fig. S142 Extraction ion chromatography-mass spectrometry analysis of the product. The EIC of m/z 344.2061 was analyzed, and its EIC corresponded to the tripeptide N-Ac-Gly-Ile<sub>2</sub>-OH with a retention time of 13.03 min.

2.31 Oligomer produced by the polymerization of 0.1 M Ac-Gly-NH<sub>2</sub> and 0.1 M Met-NH<sub>2</sub>. (Figs. S143-S150)

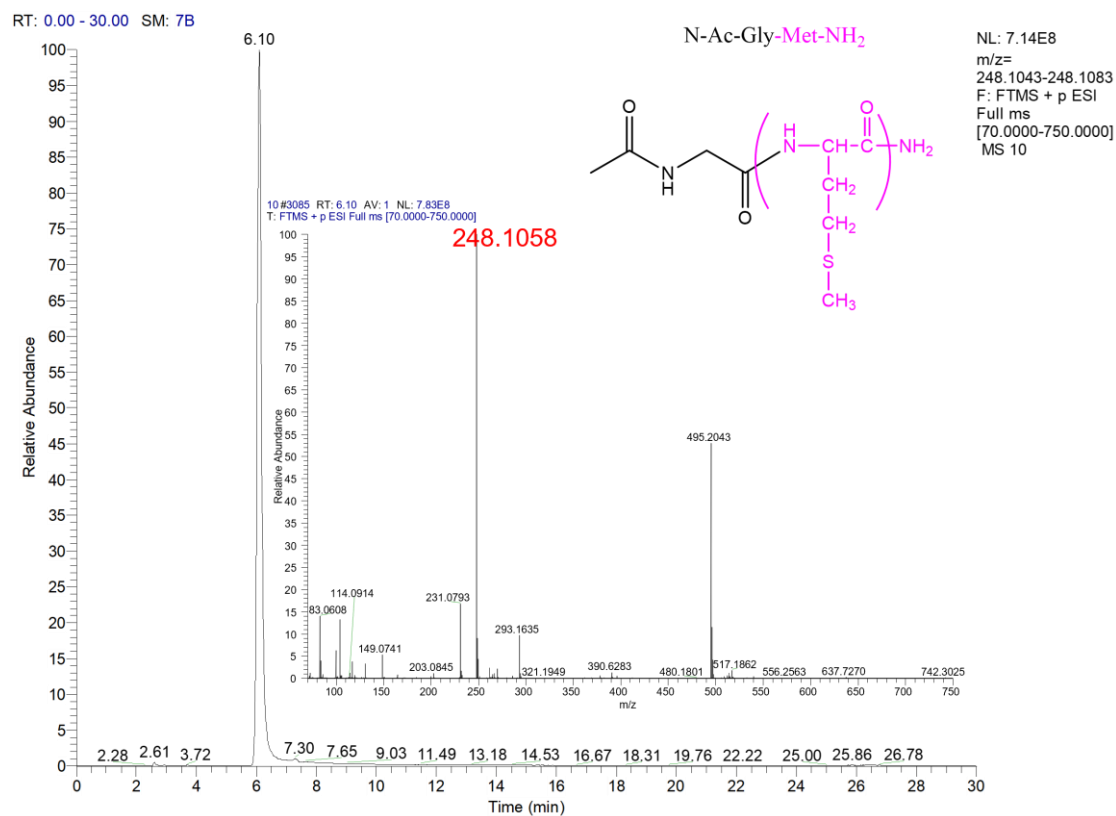

Fig. S143 Extraction ion chromatography-mass spectrometry analysis of the product. The EIC of m/z 248.1058 was analyzed, and its EIC corresponded to the dimer N-Ac-Gly-Met-NH<sub>2</sub> with a retention time of 6.10 min.

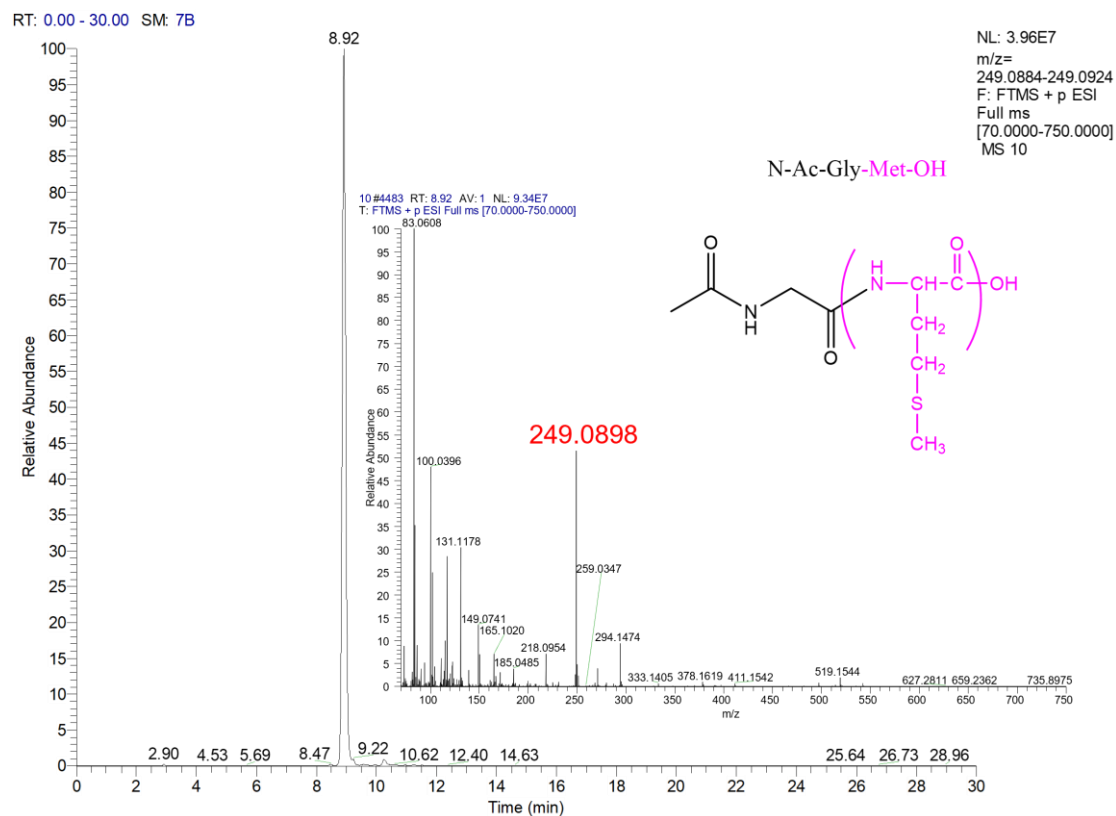

Fig. S144 Extraction ion chromatography-mass spectrometry analysis of the product. The EIC of  $m/z$  249.0898 was analyzed, and its EIC corresponded to the dipeptide N-Ac-Gly-Met-OH with a retention time of 8.92 min.



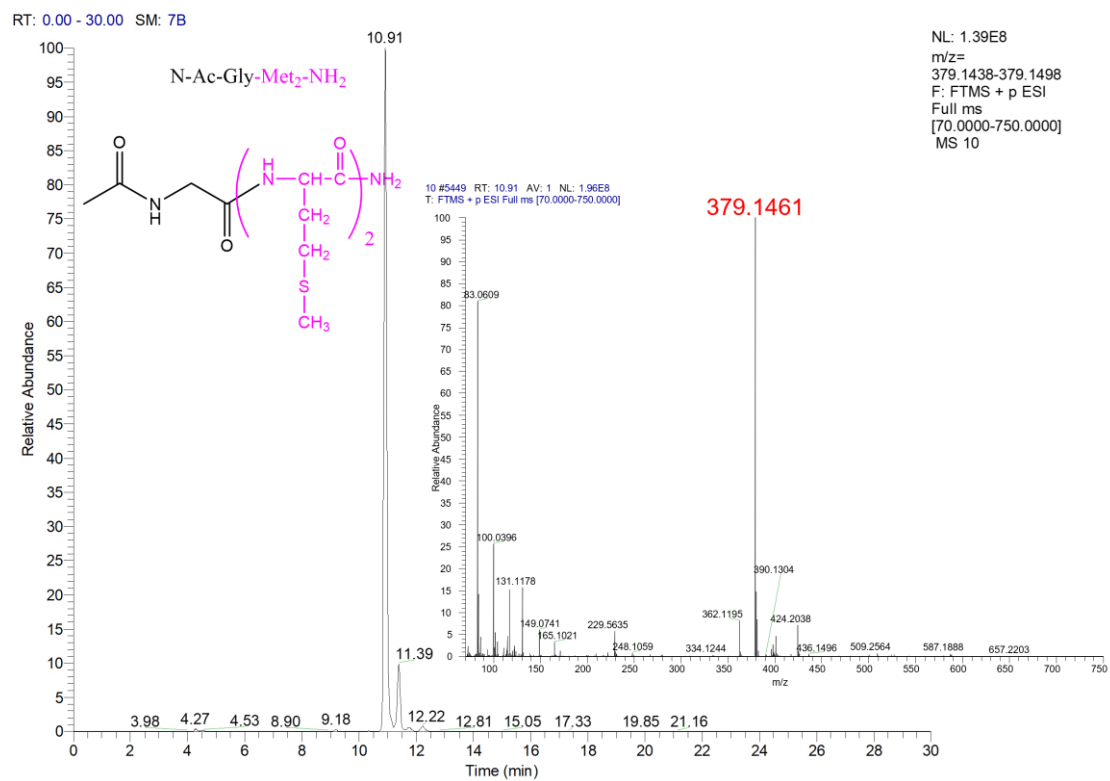

Fig. S145 Extraction ion chromatography-mass spectrometry analysis of the product. The EIC of  $m/z$  379.1461 was analyzed, and its EIC corresponds to the trimer N-Ac-Gly-Met<sub>2</sub>-NH<sub>2</sub> with a retention time of 10.91 min.

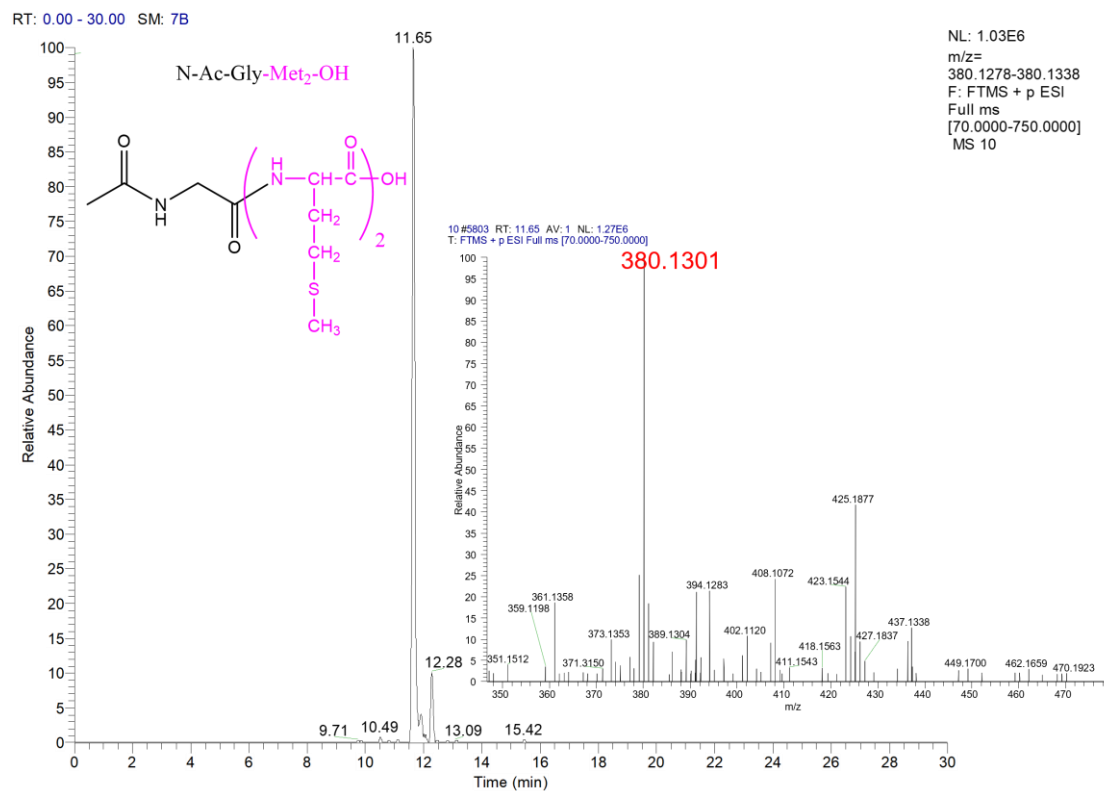

Fig. S146 Extraction ion chromatography-mass spectrometry analysis of the product. The EIC of  $m/z$  380.1301 was analyzed, and its EIC corresponded to the tripeptide N-Ac-Gly-Met<sub>2</sub>-OH with a retention time of 11.65 min.

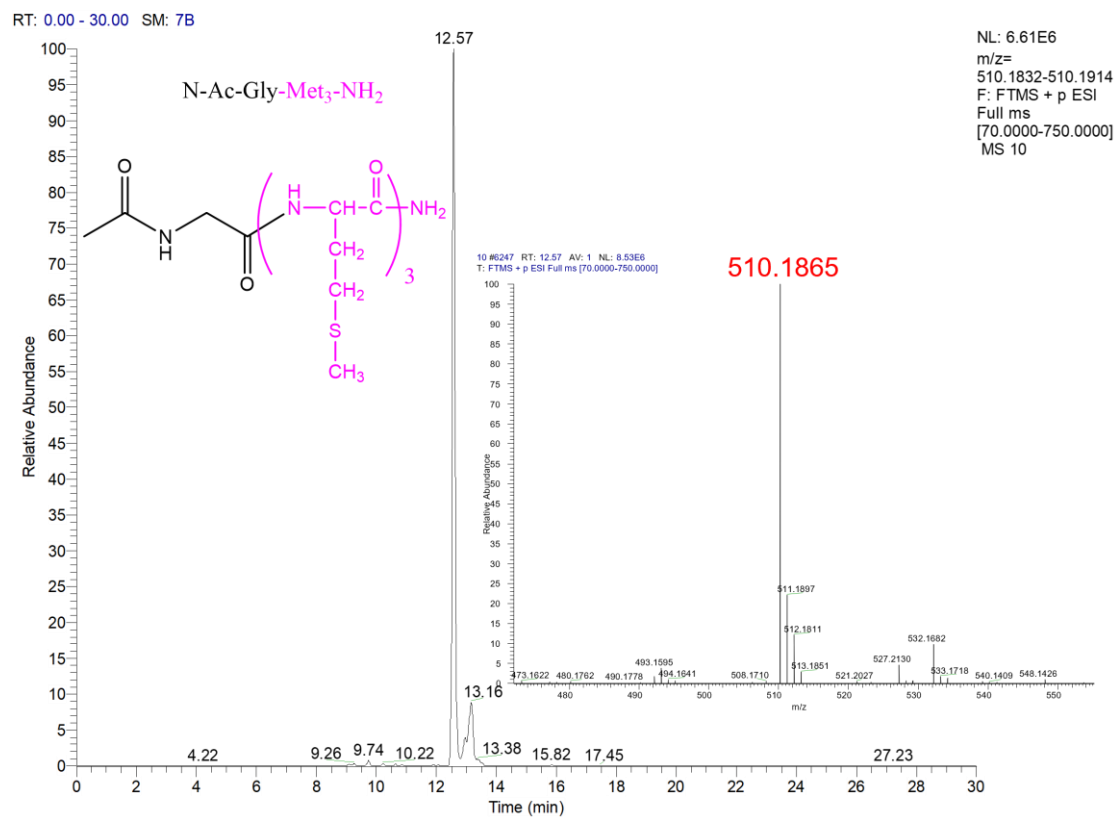

Fig. S147 Extraction ion chromatography-mass spectrometry analysis of the product. The EIC of m/z 510.1865 was analyzed and its EIC corresponded to the tetramer N-Ac-Gly-Met<sub>3</sub>-NH<sub>2</sub> with a retention time of 12.57 min.

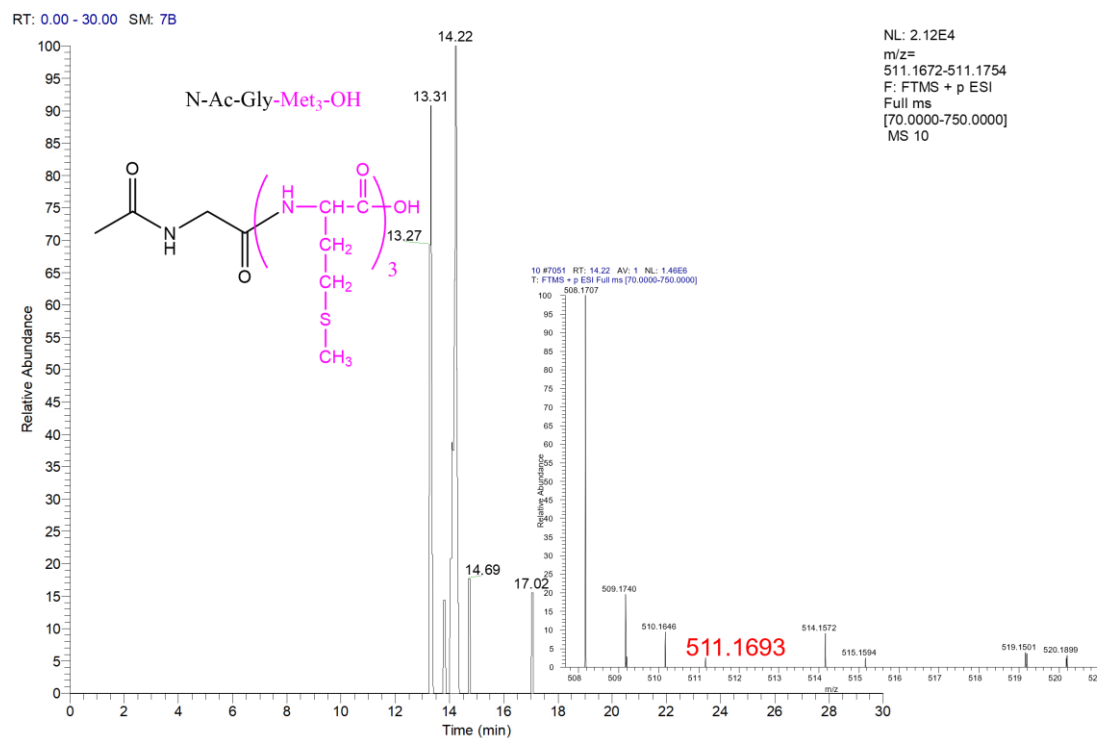

Fig. S148 Extraction ion chromatography-mass spectrometry analysis of the product. The EIC of  $m/z$  511.1693 was analyzed, and its EIC corresponded to the tetrapeptide N-Ac-Gly-Met<sub>3</sub>-OH with a retention time of 14.22 min.

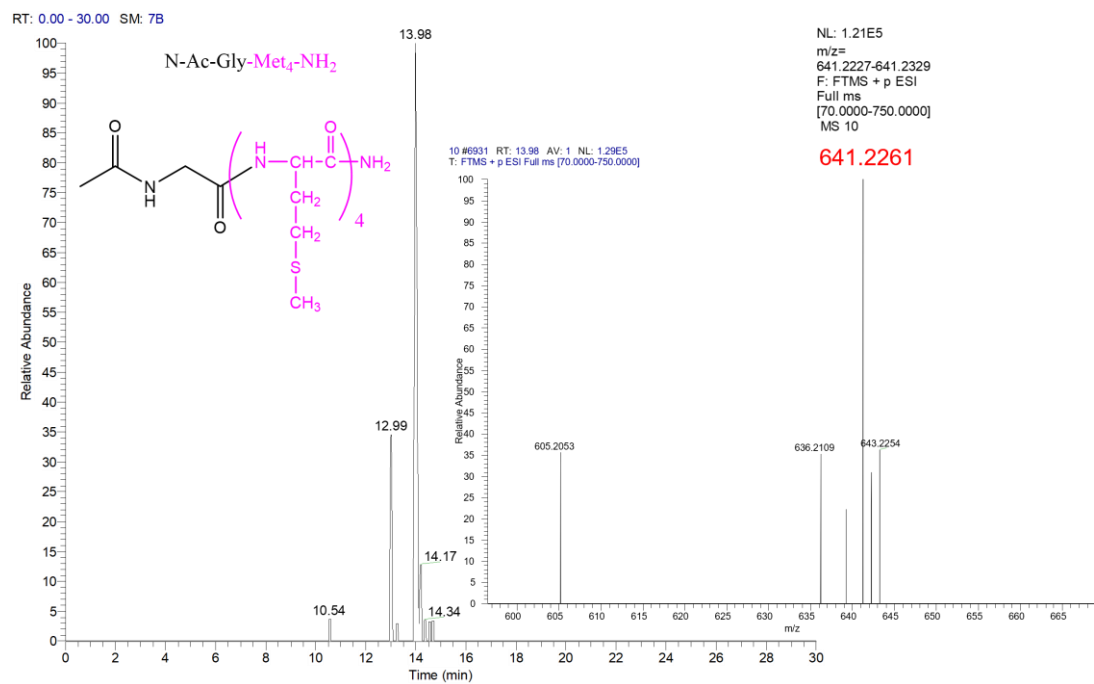

Fig. S149 Extraction ion chromatography-mass spectrometry analysis of the product. The EIC of  $m/z$  641.2261 was analyzed, and its EIC corresponded to the pentamer N-Ac-Gly-Met<sub>4</sub>-NH<sub>2</sub> with a retention time of 13.98 min.

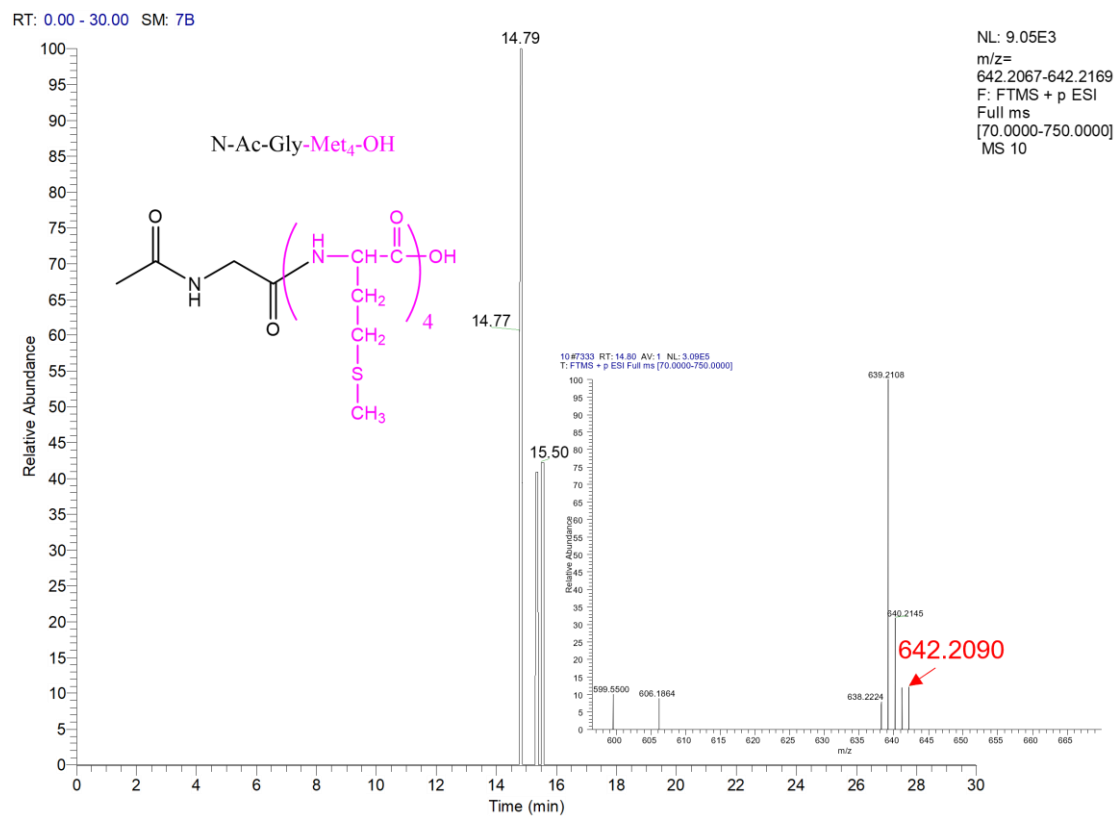

Fig. S150 Extraction ion chromatography-mass spectrometry analysis of the product. The EIC of m/z 642.2090 was analyzed, and its EIC corresponded to pentapeptide N-Ac-Gly-Met<sub>4</sub>-OH with a retention time of 14.80 min.

2.32 Oligomer produced by the polymerization of 0.1 M Ac-Gly-NH<sub>2</sub> and 0.1 M Thr-NH<sub>2</sub>. (Figs. S151-S154)

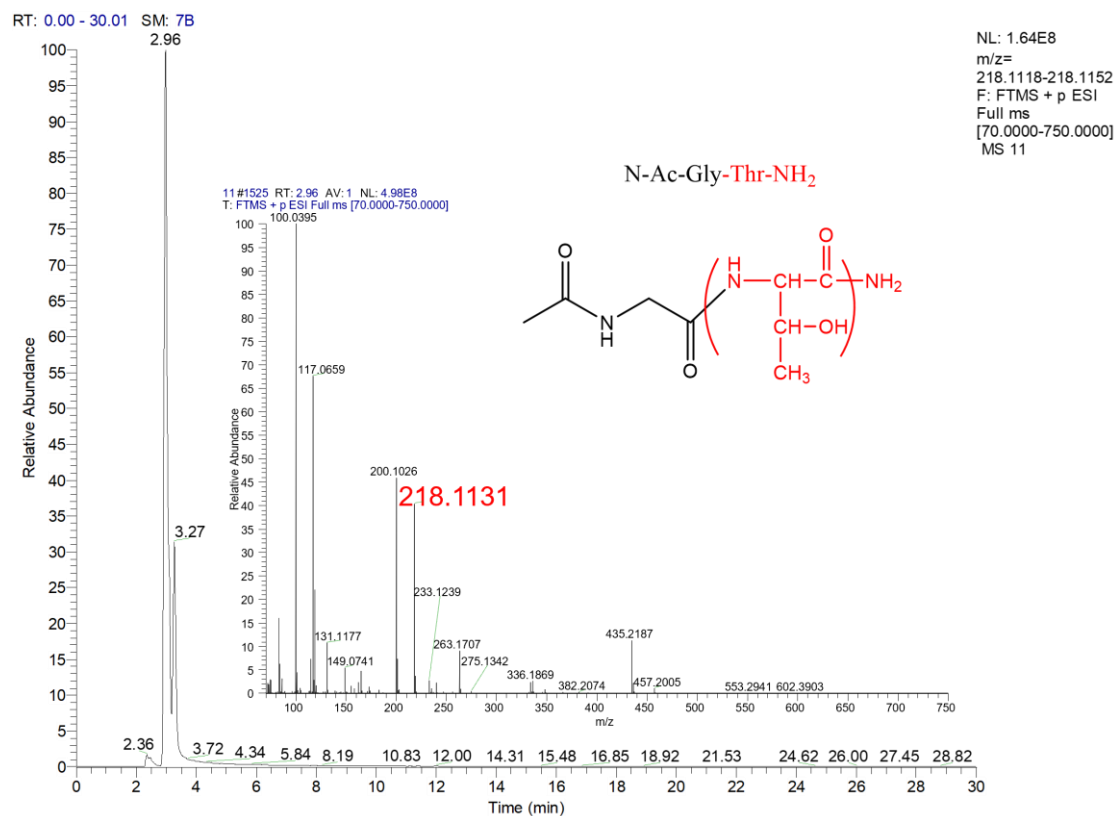

Fig. S151 Extraction ion chromatography-mass spectrometry analysis of the product. The EIC of  $m/z$  218.1131 was analyzed, and its EIC corresponded to the dimer N-Ac-Gly-Thr-NH<sub>2</sub> with a retention time of 2.96 min.

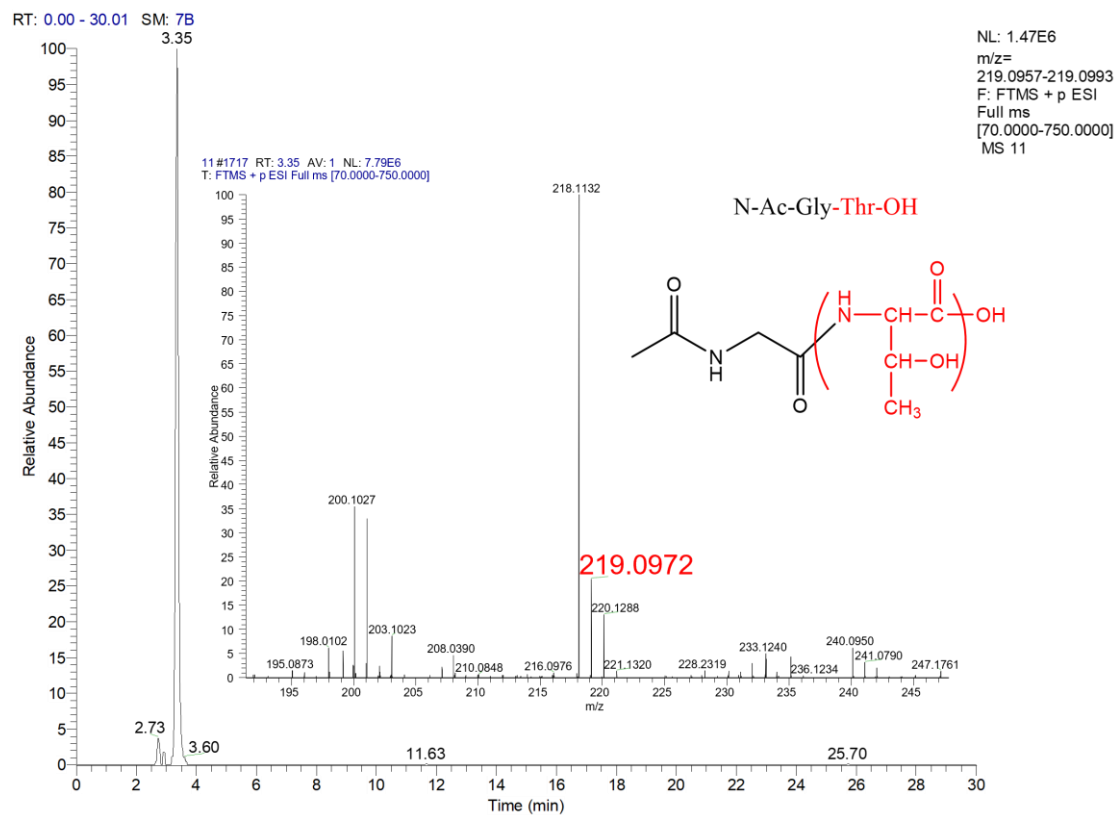

Fig. S152 Extraction ion chromatography-mass spectrometry analysis of the product. The EIC of  $m/z$  219.0972 was analyzed, and its EIC corresponded to the dipeptide N-Ac-Gly-Thr-OH with a retention time of 3.35 min.



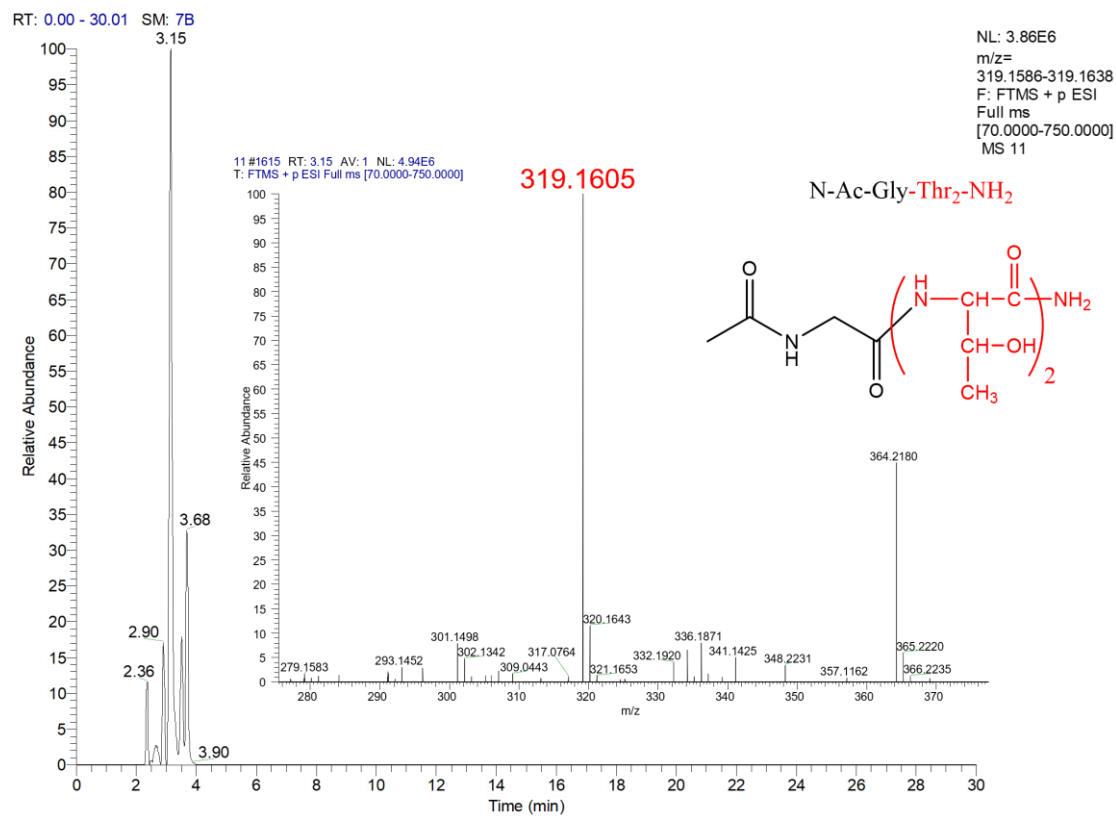

Fig. S153 Extraction ion chromatography-mass spectrometry analysis of the product. The EIC of m/z 319.1605 was analyzed, and its EIC corresponded to the trimer N-Ac-Gly-Thr<sub>2</sub>-NH<sub>2</sub> with a retention time of 3.15 min.

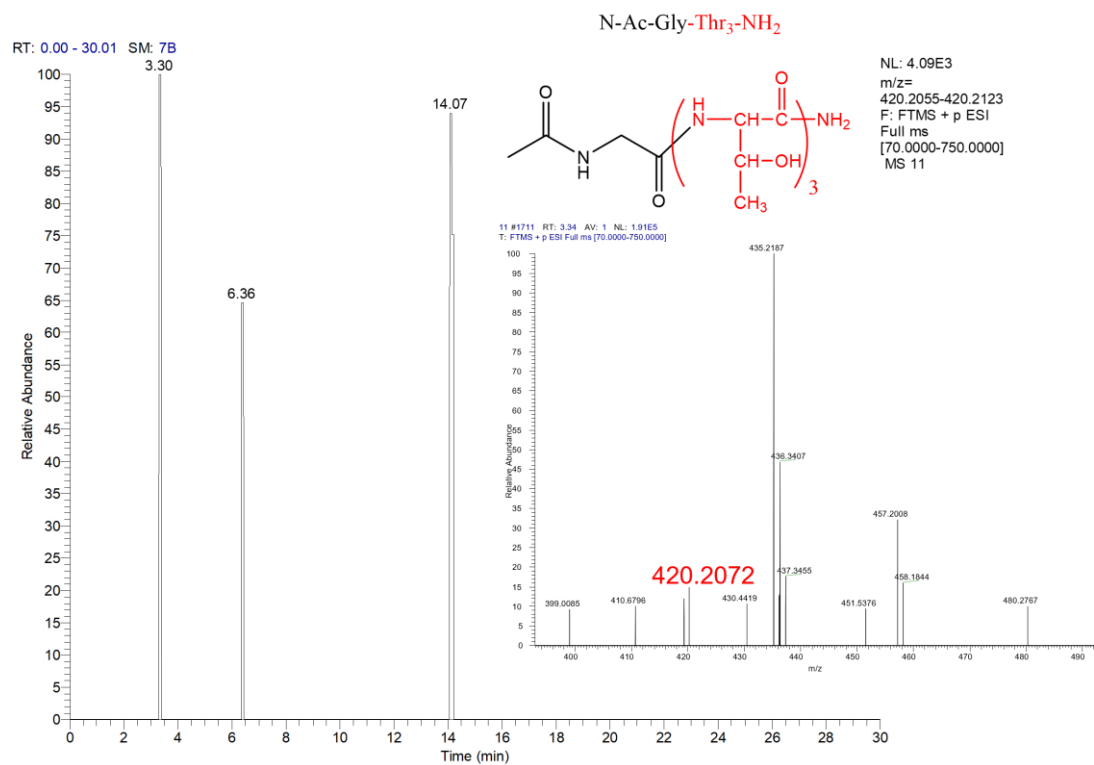

Fig. S154 Extraction ion chromatography-mass spectrometry analysis of the product. The EIC of  $m/z$  420.2072 was analyzed, and its EIC corresponded to the tetramer N-Ac-Gly-Thr<sub>3</sub>-NH<sub>2</sub> with a retention time of 3.34 min.

2.33 Oligomer produced by the polymerization of 0.1 M Ac-Gly-NH<sub>2</sub> and 0.1 M Trp-NH<sub>2</sub>. (Figs. S155-S158)

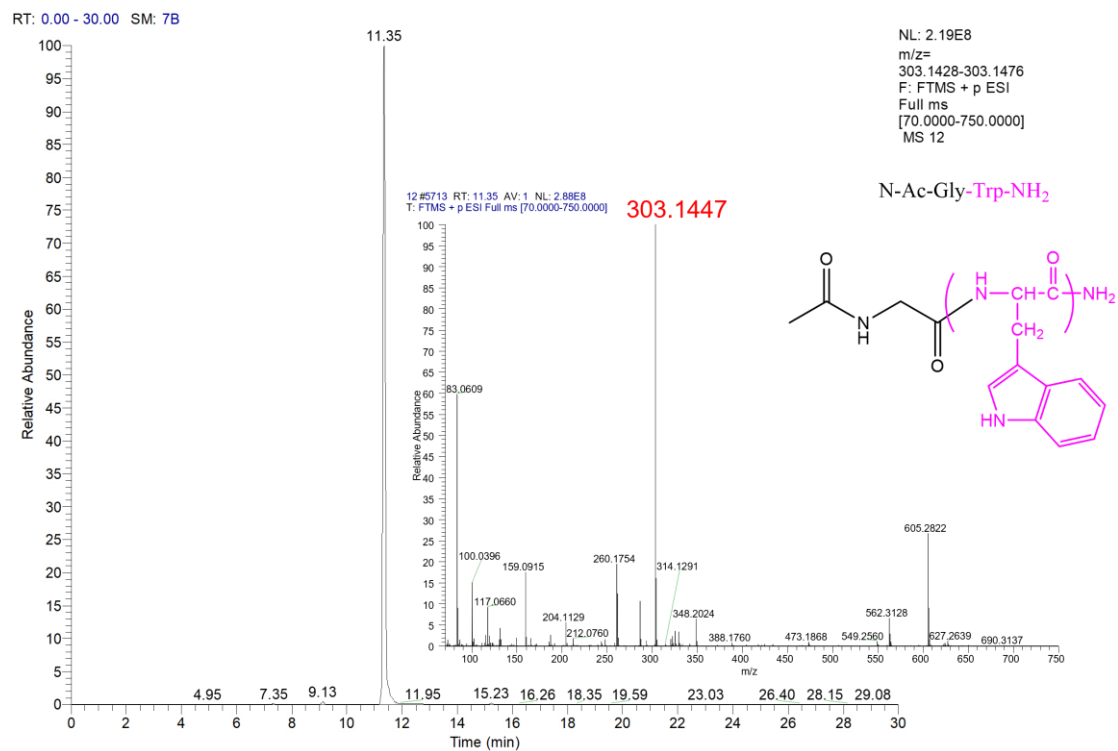

Fig. S155 Extraction ion chromatography-mass spectrometry analysis of the product. The EIC of m/z 303.1447 was analyzed, and its EIC corresponded to the dimer N-Ac-Gly-Trp-NH<sub>2</sub> with a retention time of 11.35 min.

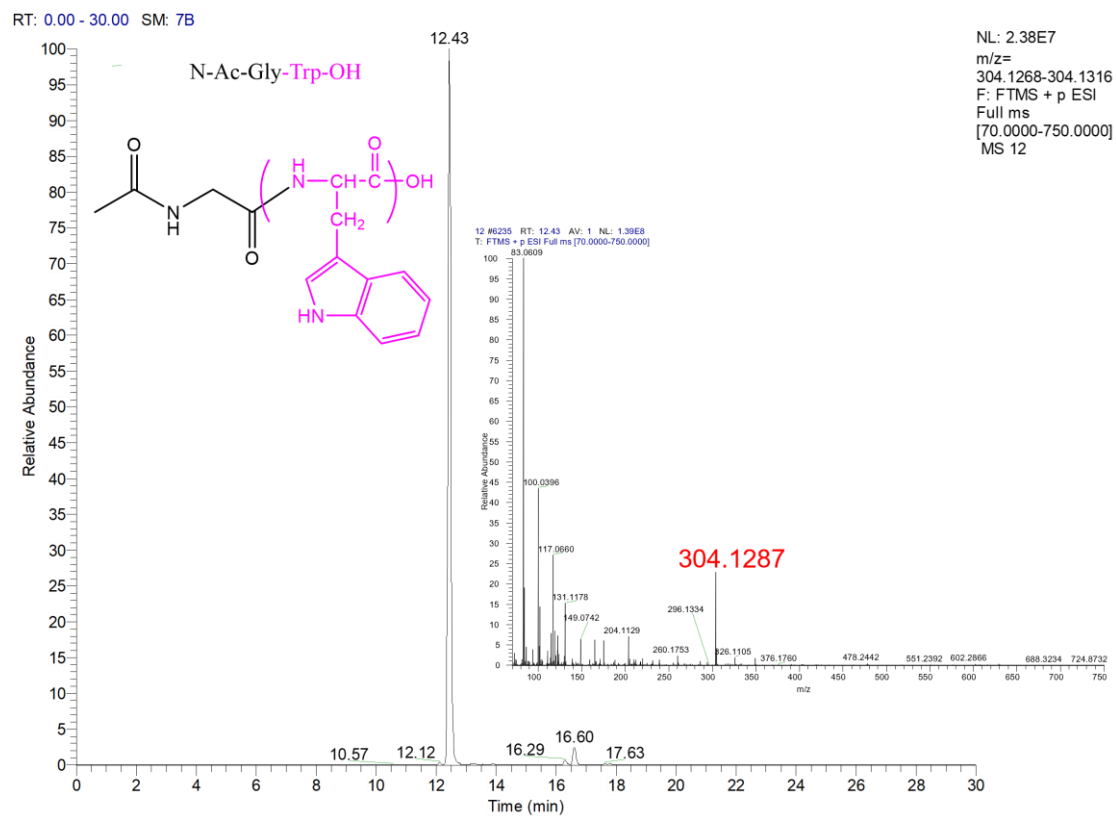

Fig. S156 Extraction ion chromatography-mass spectrometry analysis of the product. The EIC of  $m/z$  304.1287 was analyzed, and its EIC corresponded to the dipeptide N-Ac-Gly-Trp-OH with a retention time of 12.43 min.



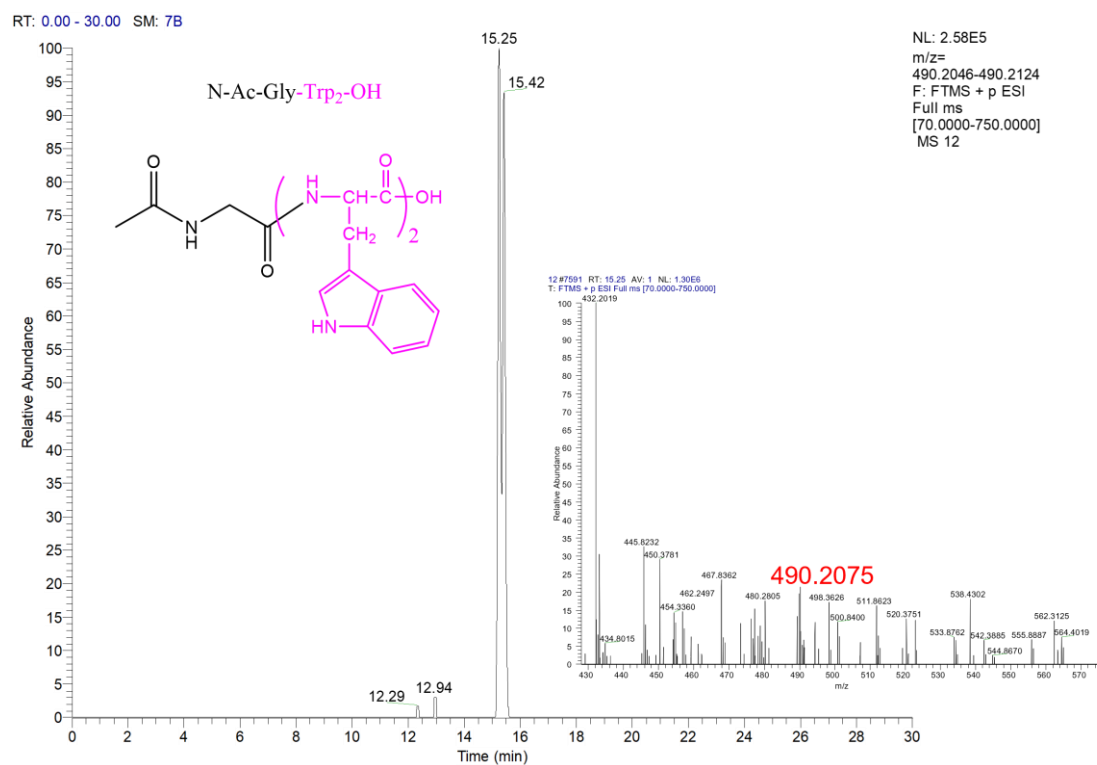

Fig. S158 Extraction ion chromatography-mass spectrometry analysis of the product. The EIC of  $m/z$  490.2075 was analyzed, and its EIC corresponded to the tripeptide N-Ac-Gly-Trp<sub>2</sub>-OH with a retention time of 15.25 min.

2.34 Oligomer produced by the polymerization of 0.1 M Ac-Gly-NH<sub>2</sub> and 0.1 M His-NH<sub>2</sub>. (Figs. S159-S164)

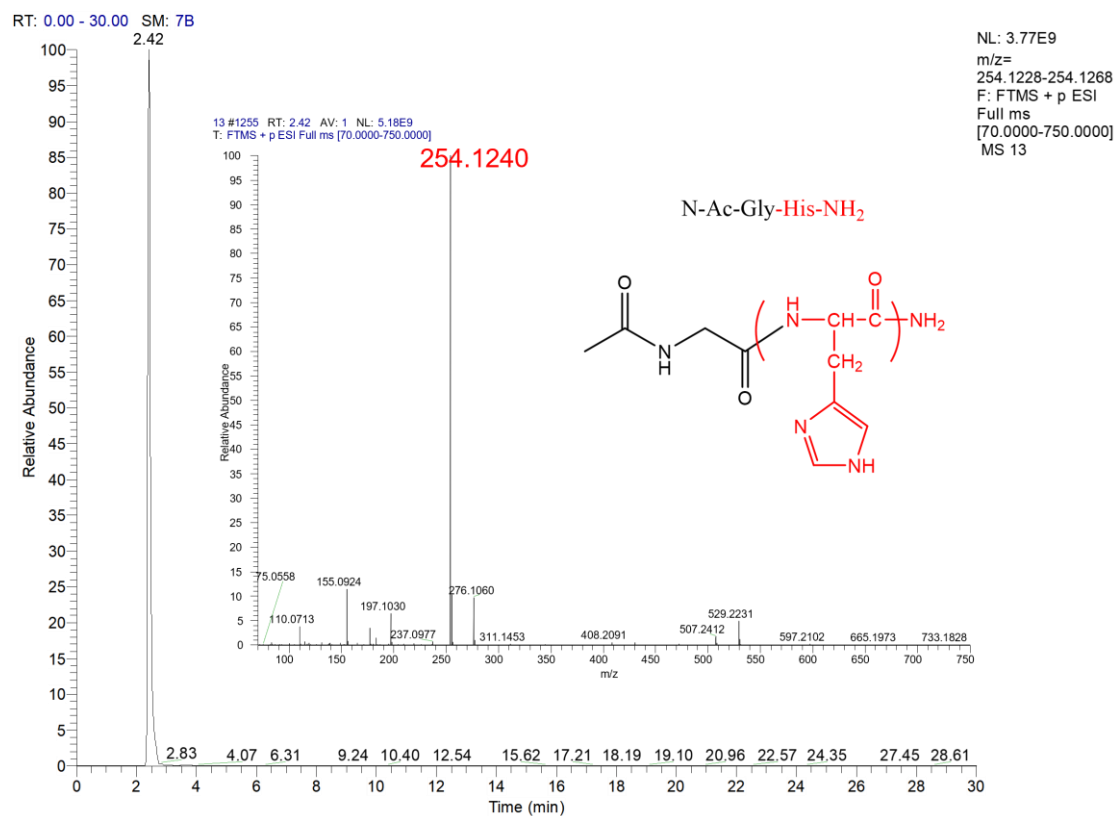

Fig. S159 Extraction ion chromatography-mass spectrometry analysis of the product. The EIC of m/z 254.1240 was analyzed, and its EIC corresponded to the dimer N-Ac-Gly-His-NH<sub>2</sub> with a retention time of 2.42 min.

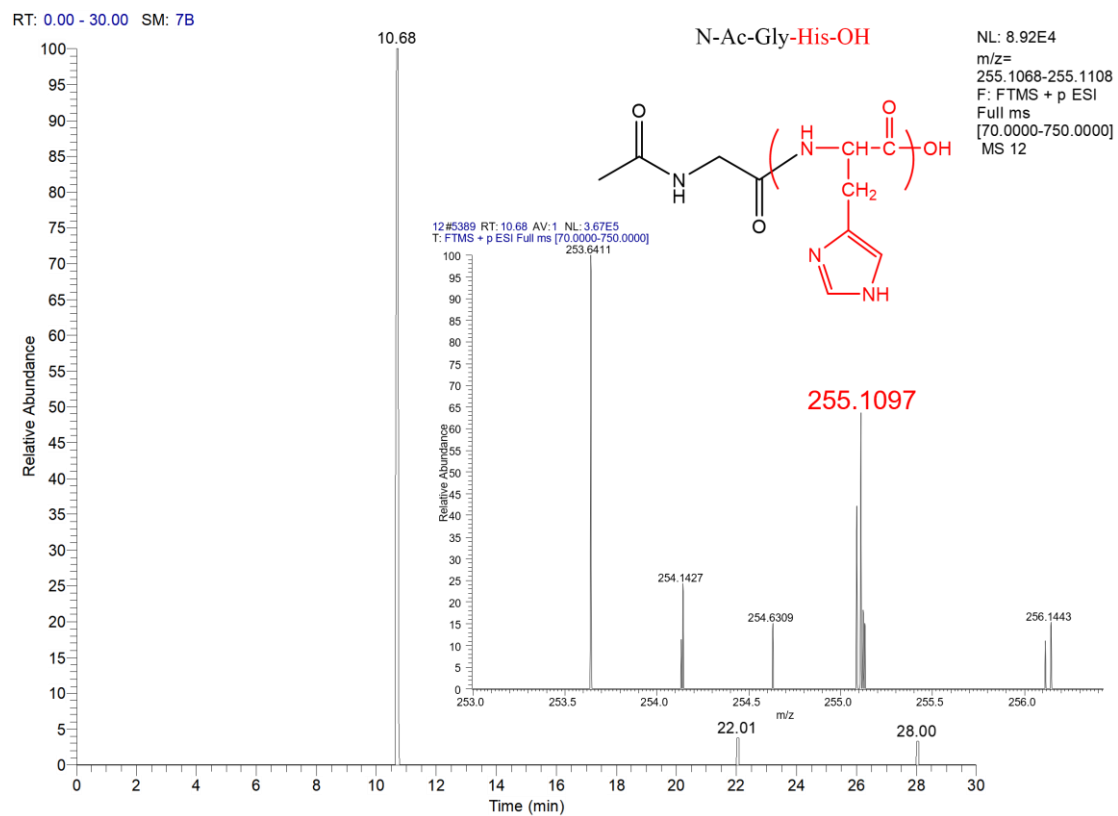

Fig. S160 Extraction ion chromatography-mass spectrometry analysis of the product. The EIC of m/z 255.1097 was analyzed, and its EIC corresponded to the dipeptide N-Ac-Gly-His-OH with a retention time of 10.68 min.



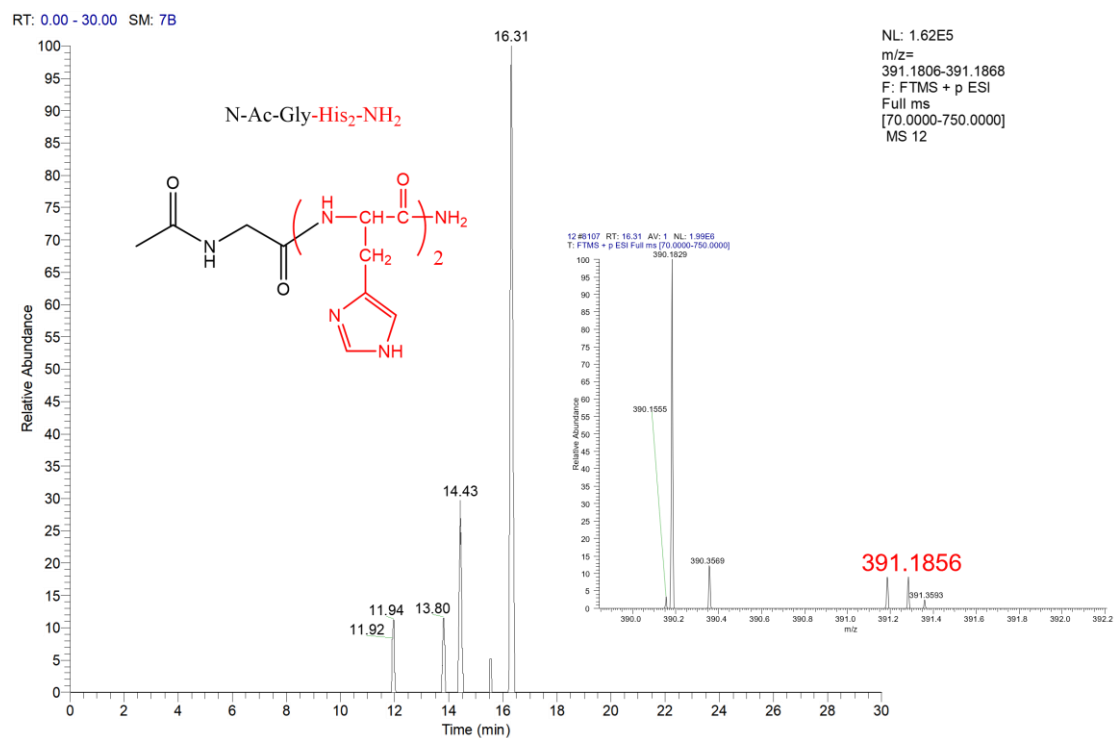

Fig. S161 Extraction ion chromatography-mass spectrometry analysis of the product. The EIC of  $m/z$  391.1856 was analyzed, and its EIC corresponded to the trimer N-Ac-Gly-His<sub>2</sub>-NH<sub>2</sub> with a retention time of 16.31 min.

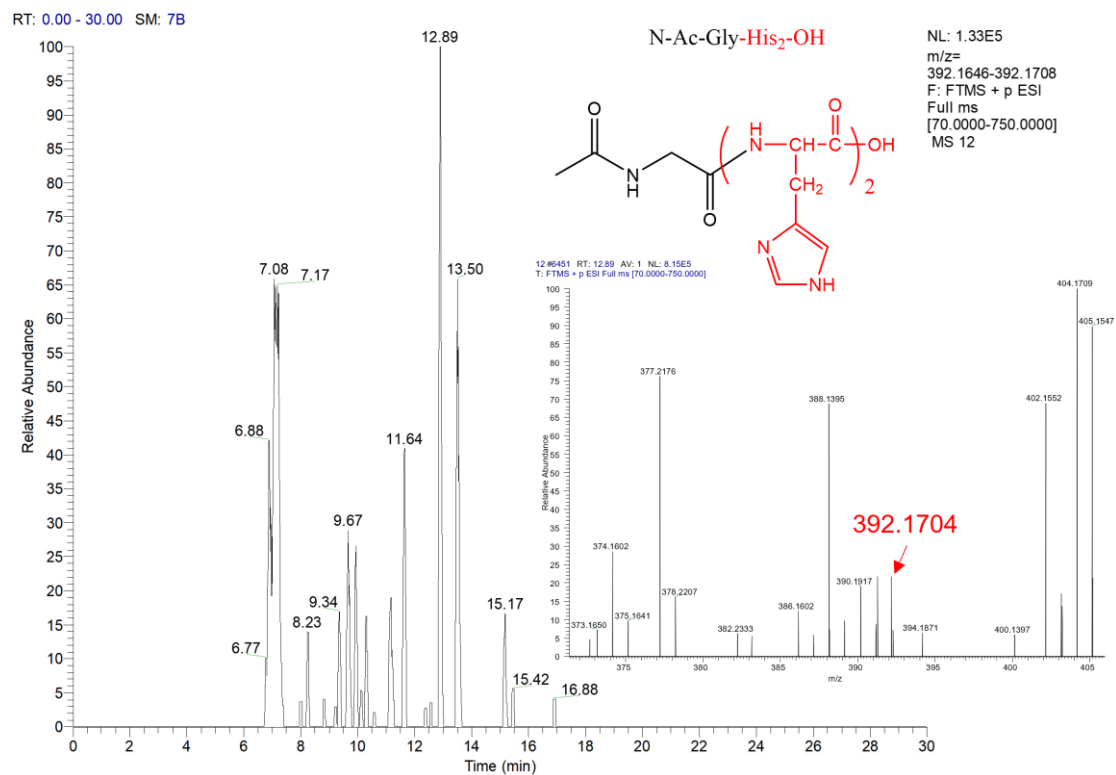

Fig. S162 Extraction ion chromatography-mass spectrometry analysis of the product. The EIC of  $m/z$  392.1704 was analyzed, and its EIC corresponded to the tripeptide N-Ac-Gly-His<sub>2</sub>-OH with a retention time of 12.89 min.

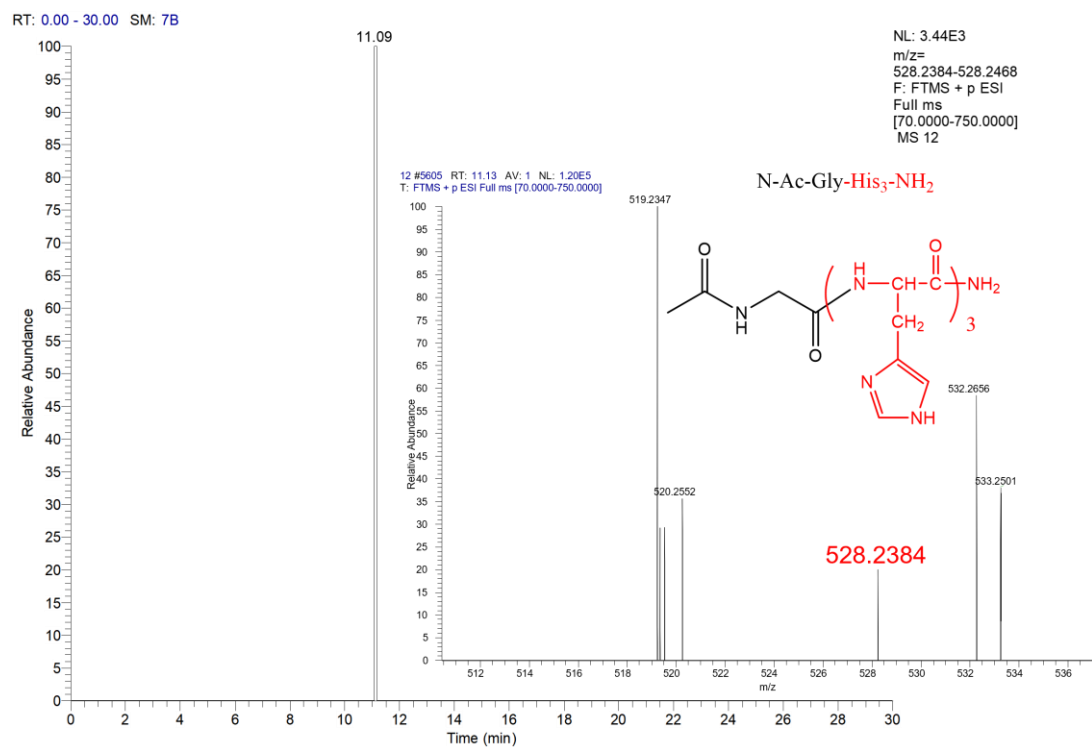

Fig. S163 Extraction ion chromatography-mass spectrometry analysis of the product. The EIC of  $m/z$  528.2384 was analyzed, and its EIC corresponded to the tetramer N-Ac-Gly-His<sub>3</sub>-NH<sub>2</sub> with a retention time of 11.13 min.

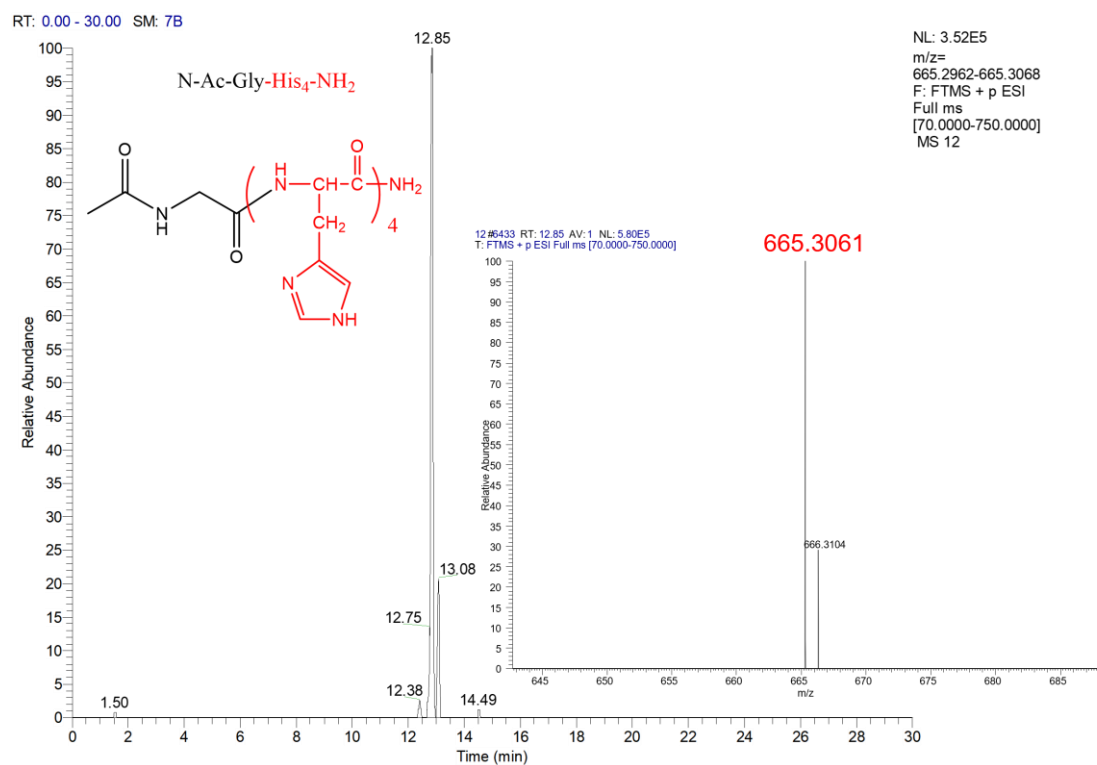

Fig. S164 Extraction ion chromatography-mass spectrometry analysis of the product. The EIC of  $m/z$  665.3061 was analyzed, and its EIC corresponded to the pentamer N-Ac-Gly-His<sub>4</sub>-NH<sub>2</sub> with a retention time of 12.85 min.

2.35 Oligomer produced by the polymerization of 0.1 M Ac-Gly-NH<sub>2</sub> and 0.1 M Asp-NH<sub>2</sub>. (Figs. S165-S172)

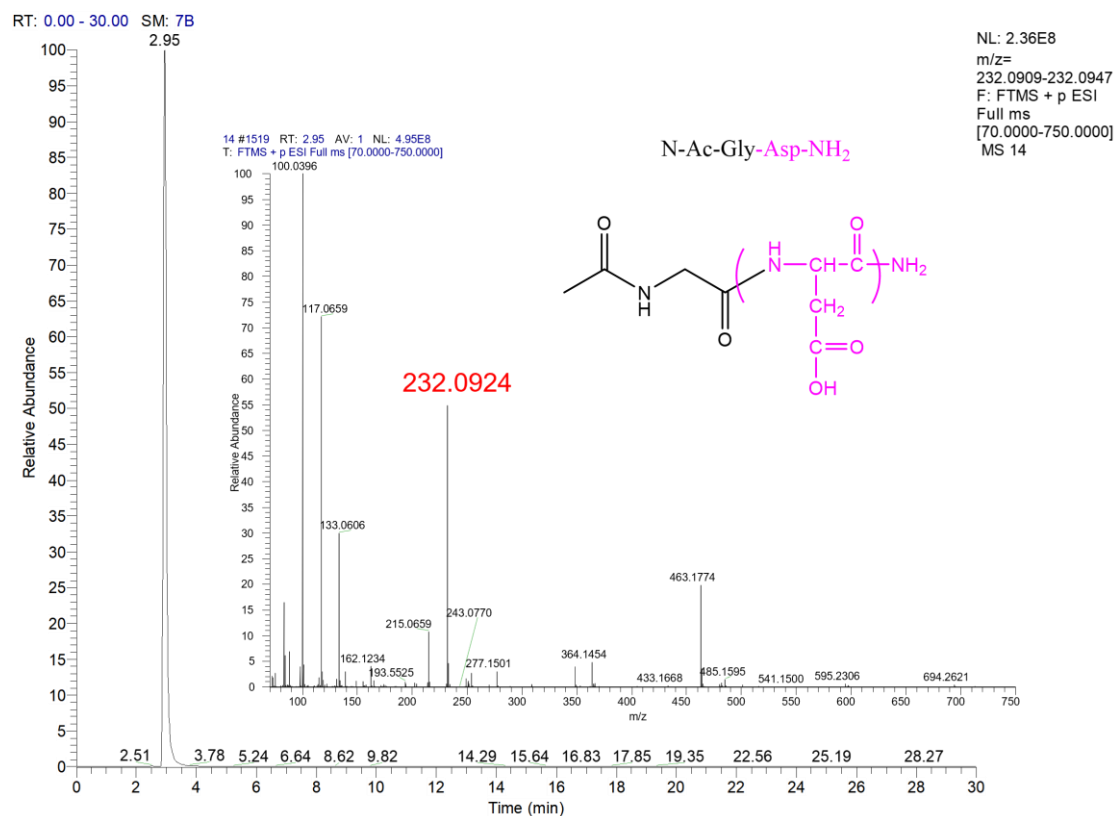

Fig. S165 Extraction ion chromatography-mass spectrometry analysis of the product. The EIC of m/z 232.0924 was analyzed, and its EIC corresponded to the dimer N-Ac-Gly-Asp-NH<sub>2</sub> with a retention time of 2.95 min.

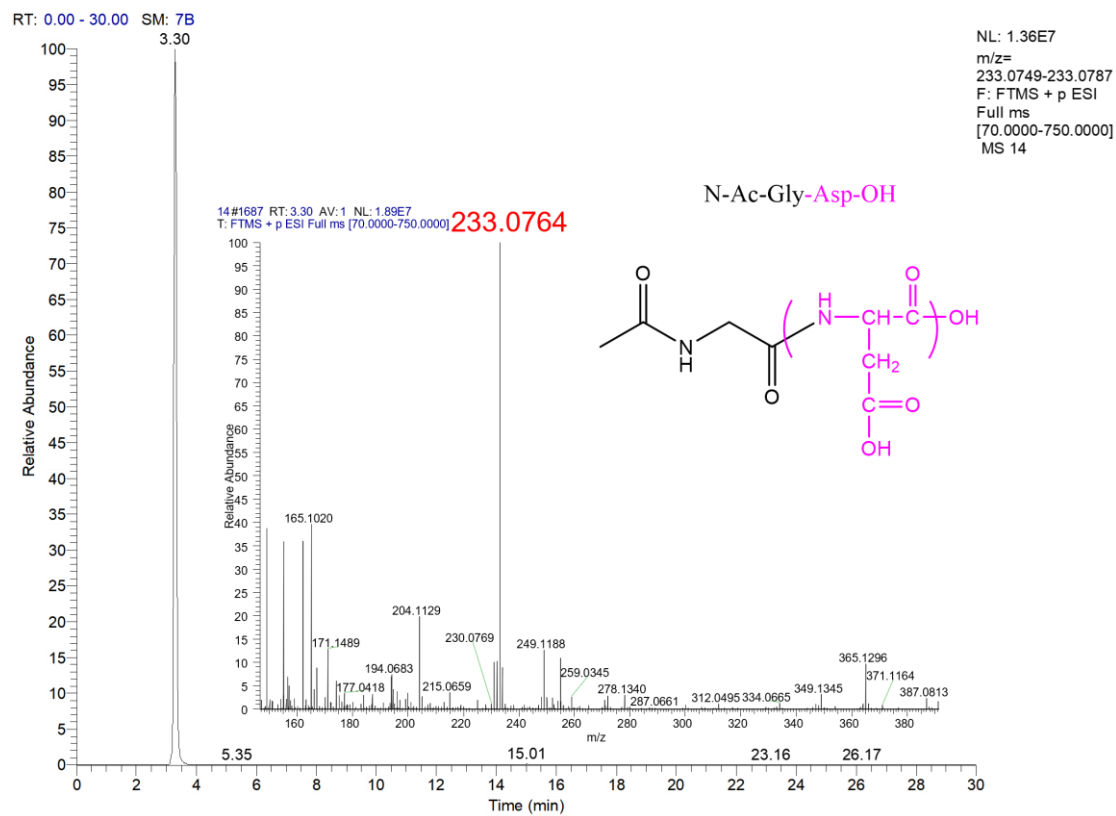

Fig. S166 Extraction ion chromatography-mass spectrometry analysis of the product. The EIC of m/z 233.0764 was analyzed, and its EIC corresponded to the dipeptide N-Ac-Gly-Asp-OH with a retention time of 3.30 min.

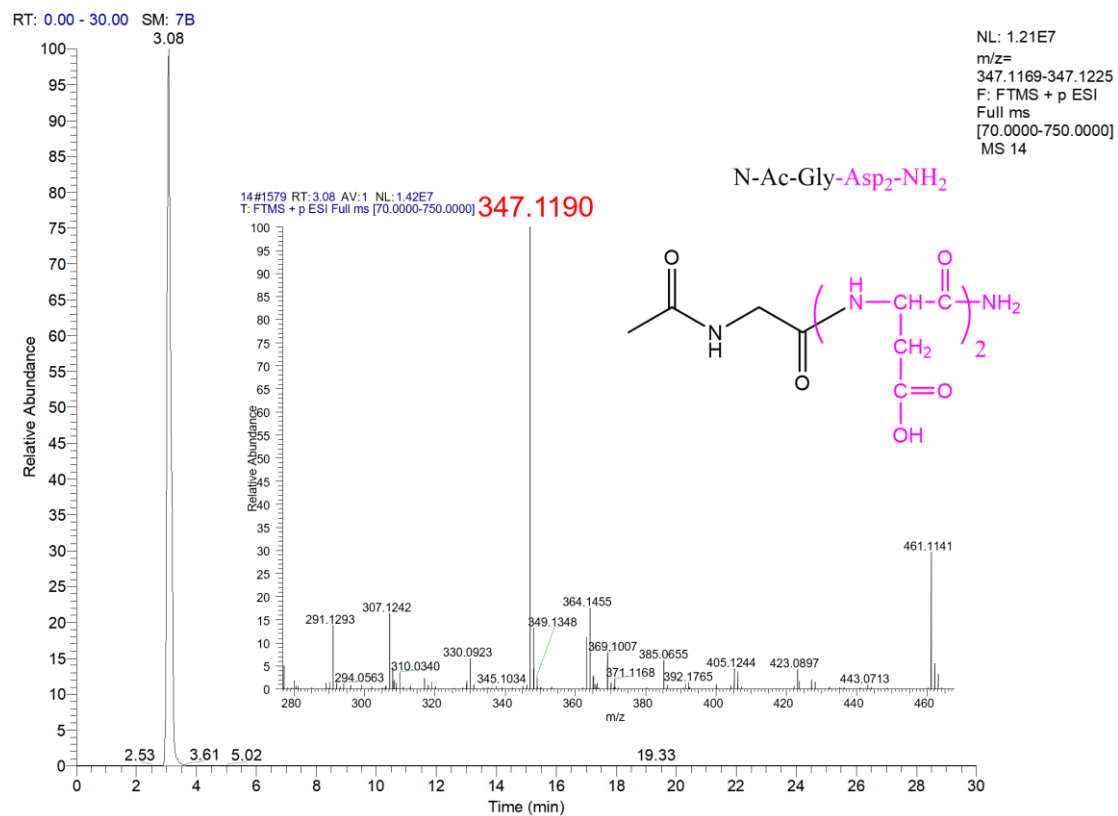

Fig. S167 Extraction ion chromatography-mass spectrometry analysis of the product. The EIC of m/z 347.1190 was analyzed, and its EIC corresponded to the trimer N-Ac-Gly-Asp<sub>2</sub>-NH<sub>2</sub> with a retention time of 3.08 min.

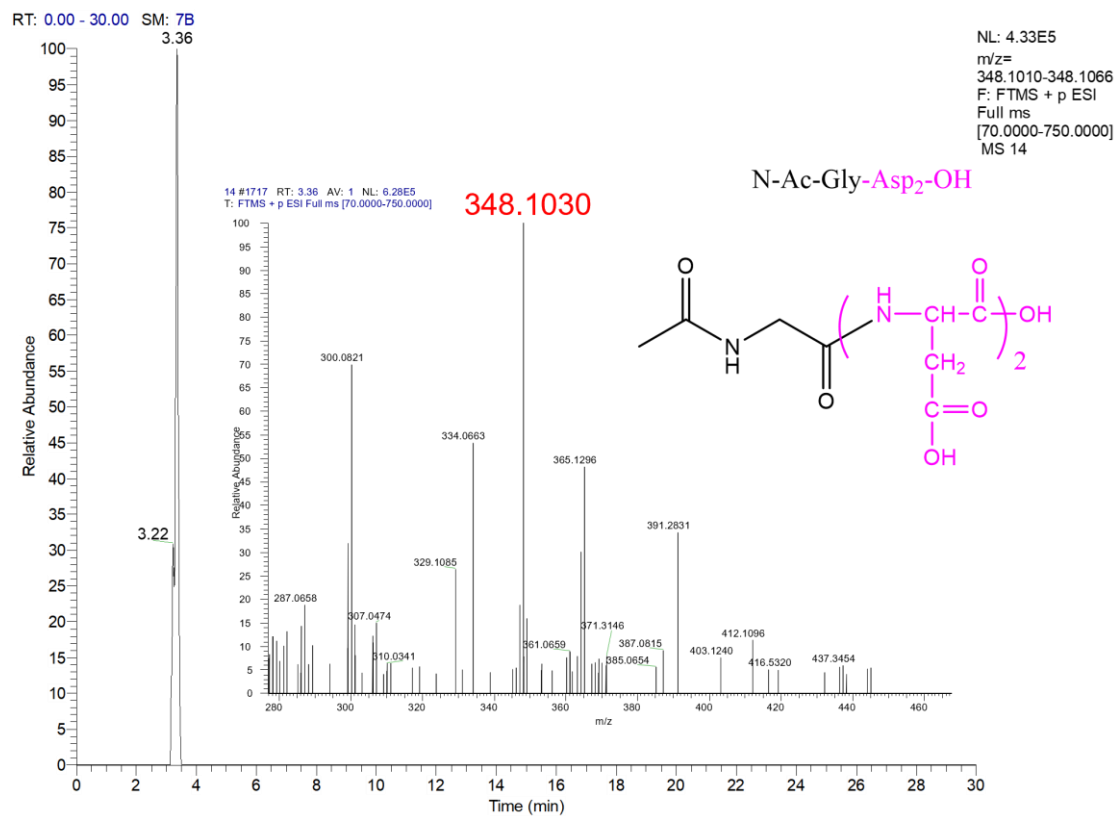

Fig. S168 Extraction ion chromatography-mass spectrometry analysis of the product. The EIC of m/z 348.1030 was analyzed. The EIC corresponds to the tripeptide N-Ac-Gly-Asp<sub>2</sub>-OH, and the retention time is 3.36 min.



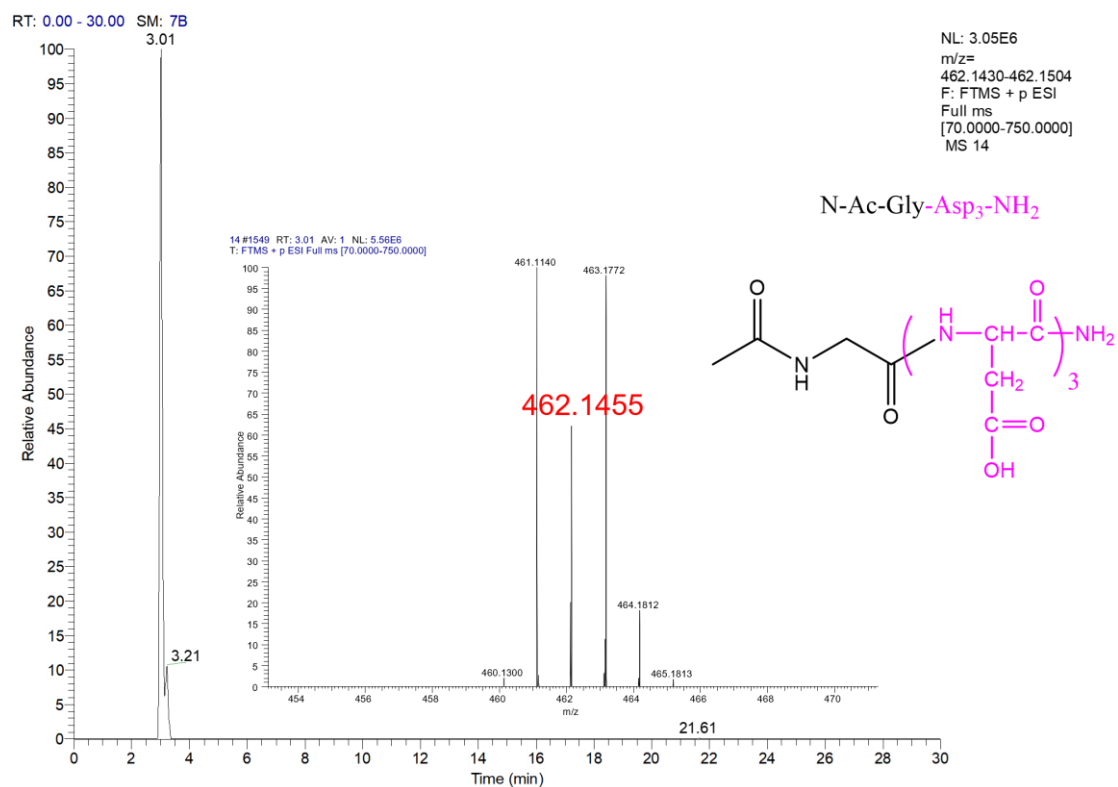

Fig. S169 Extraction ion chromatography-mass spectrometry analysis of the product. The EIC of m/z 462.1455 was analyzed, and its EIC corresponded to the tetramer N-Ac-Gly-Asp<sub>3</sub>-NH<sub>2</sub> with a retention time of 3.01 min.

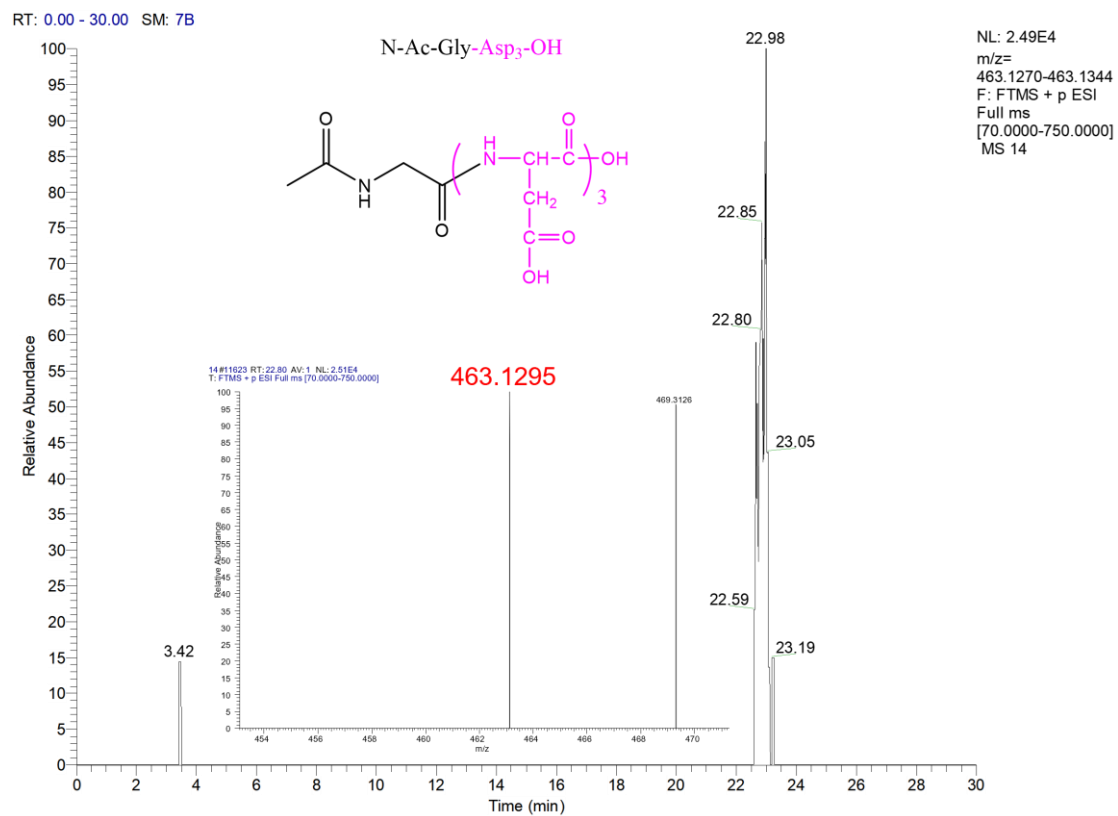

Fig. S170 Extraction ion chromatography-mass spectrometry analysis of the product. The EIC of m/z 463.1295 was analyzed, and its EIC corresponded to the tetrapeptide N-Ac-Gly-Asp<sub>3</sub>-OH with a retention time of 22.80 min.

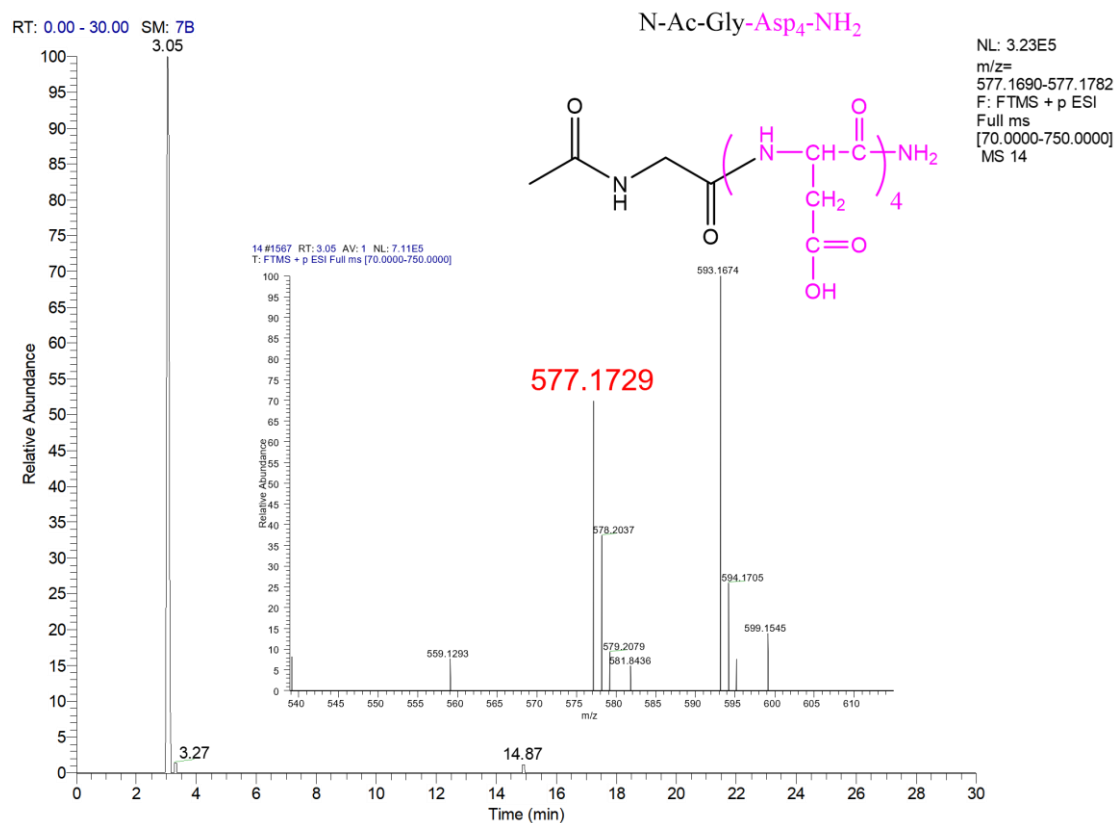

Fig. S171 Extraction ion chromatography-mass spectrometry analysis of the product. The EIC of  $m/z$  577.1729 was analyzed, and the EIC corresponds to the pentamer N-Ac-Gly-Asp<sub>4</sub>-NH<sub>2</sub> with a retention time of 3.05 min.

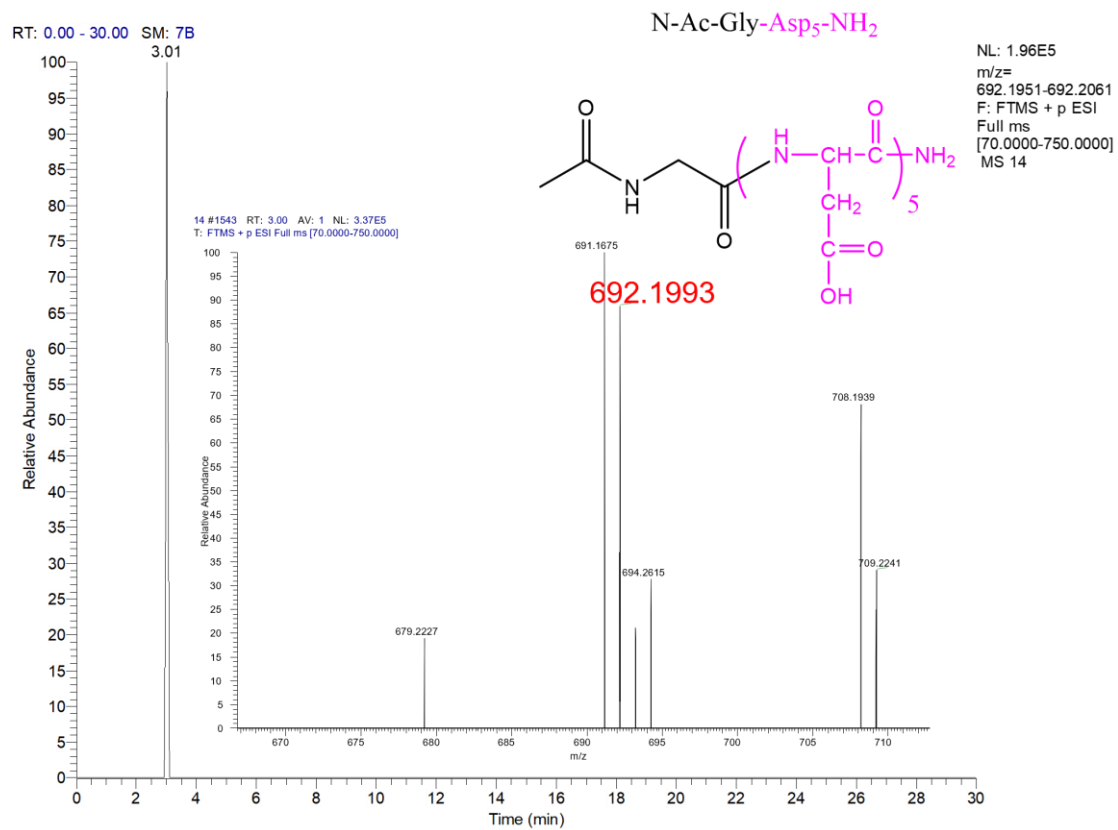

Fig. S172 Extraction ion chromatography-mass spectrometry analysis of the product. The EIC of  $m/z$  692.1993 was analyzed, and its EIC corresponded to the hamerer N-Ac-Gly-Asp<sub>5</sub>-NH<sub>2</sub> with a retention time of 3.00 min.

2.36 Oligomer produced by the polymerization of 0.1 M Ac-Gly-NH<sub>2</sub> and 0.1 M Tyr-NH<sub>2</sub>. (Figs. S173-S177)

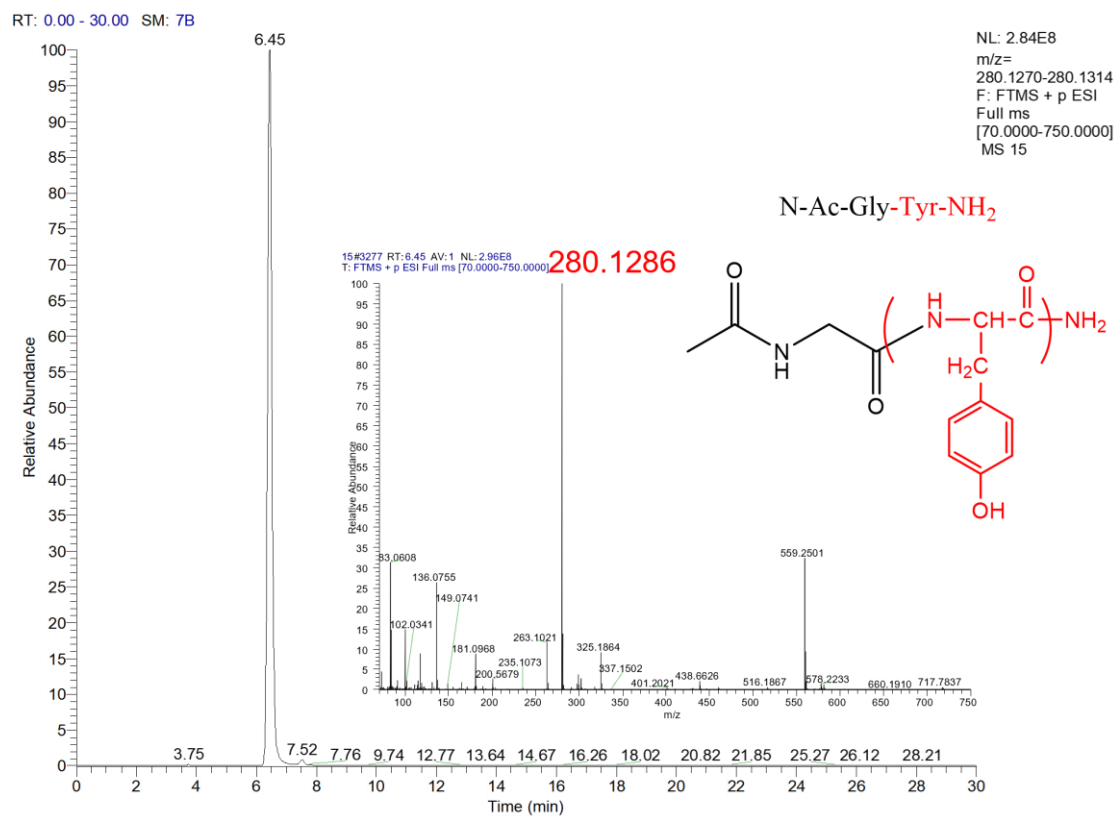

Fig. S173 Extraction ion chromatography-mass spectrometry analysis of the product. The EIC of m/z 280.1286 was analyzed, and its EIC corresponded to the dimer N-Ac-Gly-Tyr-NH<sub>2</sub> with a retention time of 6.45 min.

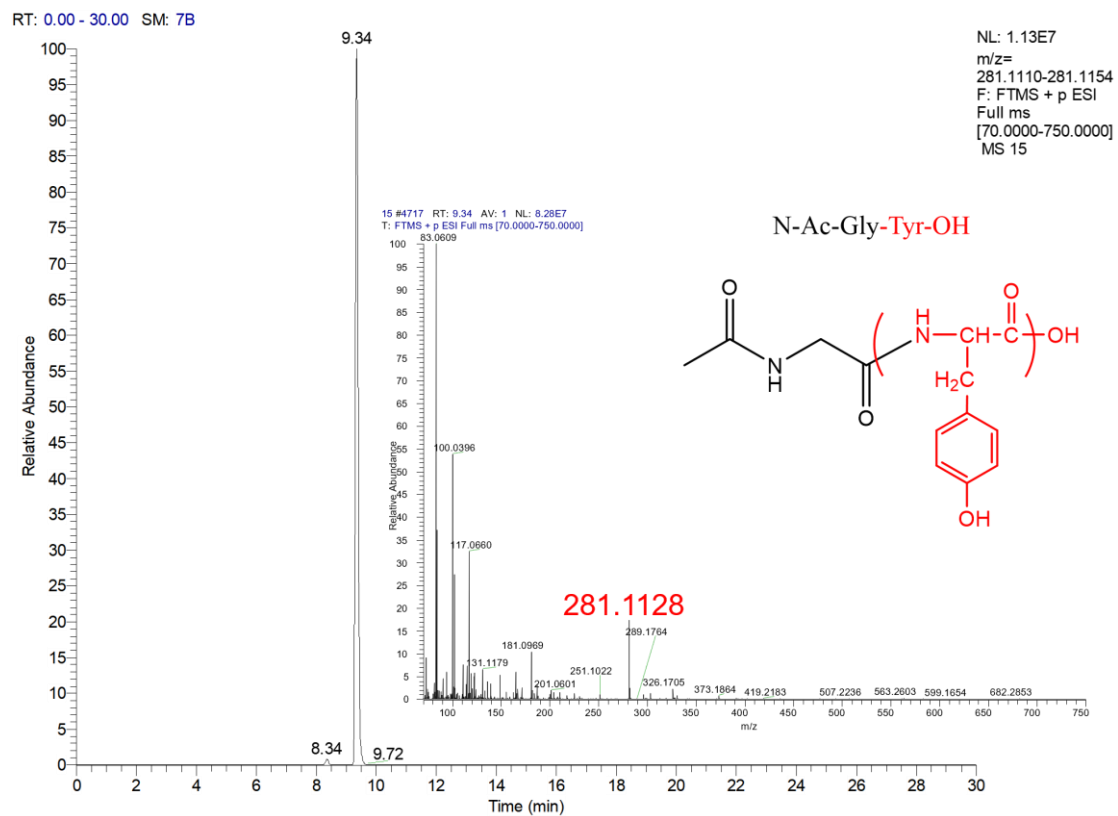

Fig. S174 Extraction ion chromatography-mass spectrometry analysis of the product. The EIC of  $m/z$  281.1128 was analyzed, and its EIC corresponded to the dipeptide N-Ac-Gly-Tyr-OH with a retention time of 9.34 min.

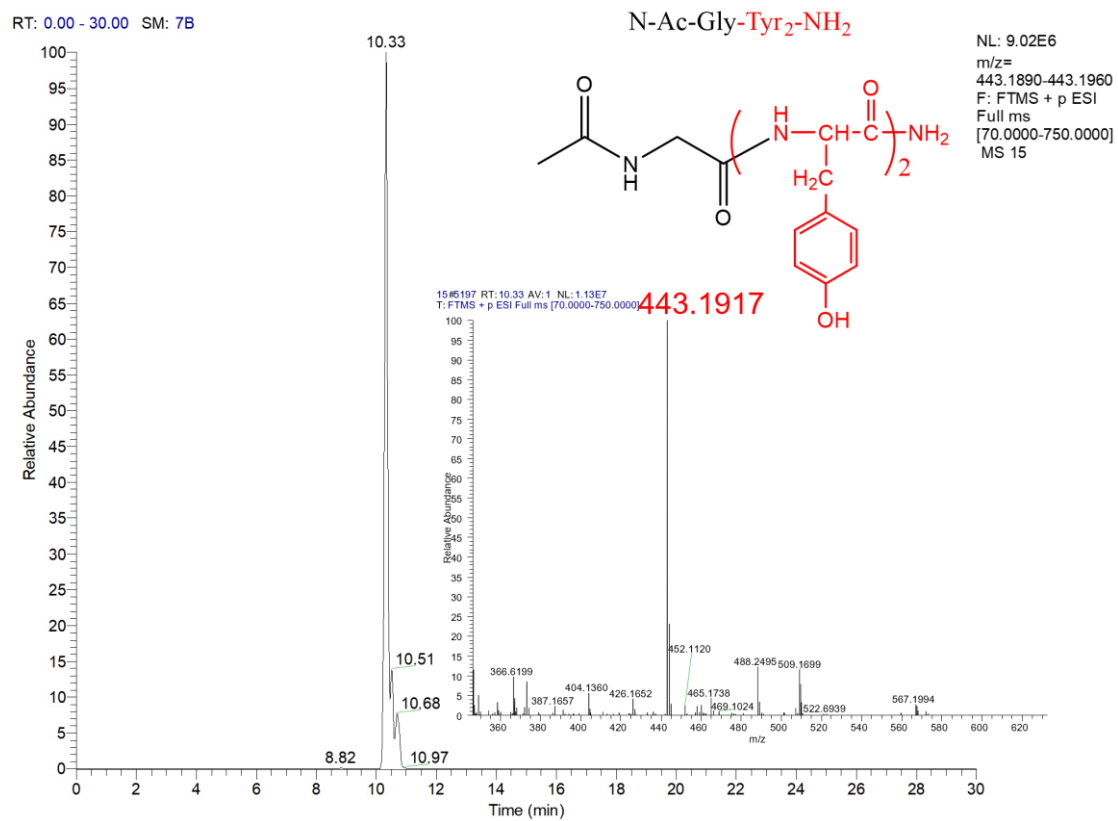

Fig. S175 Extraction ion chromatography-mass spectrometry analysis of the product. The EIC of m/z 443.1917 was analyzed, and its EIC corresponds to the trimer N-Ac-Gly-Tyr<sub>2</sub>-NH<sub>2</sub> with a retention time of 10.33 min.

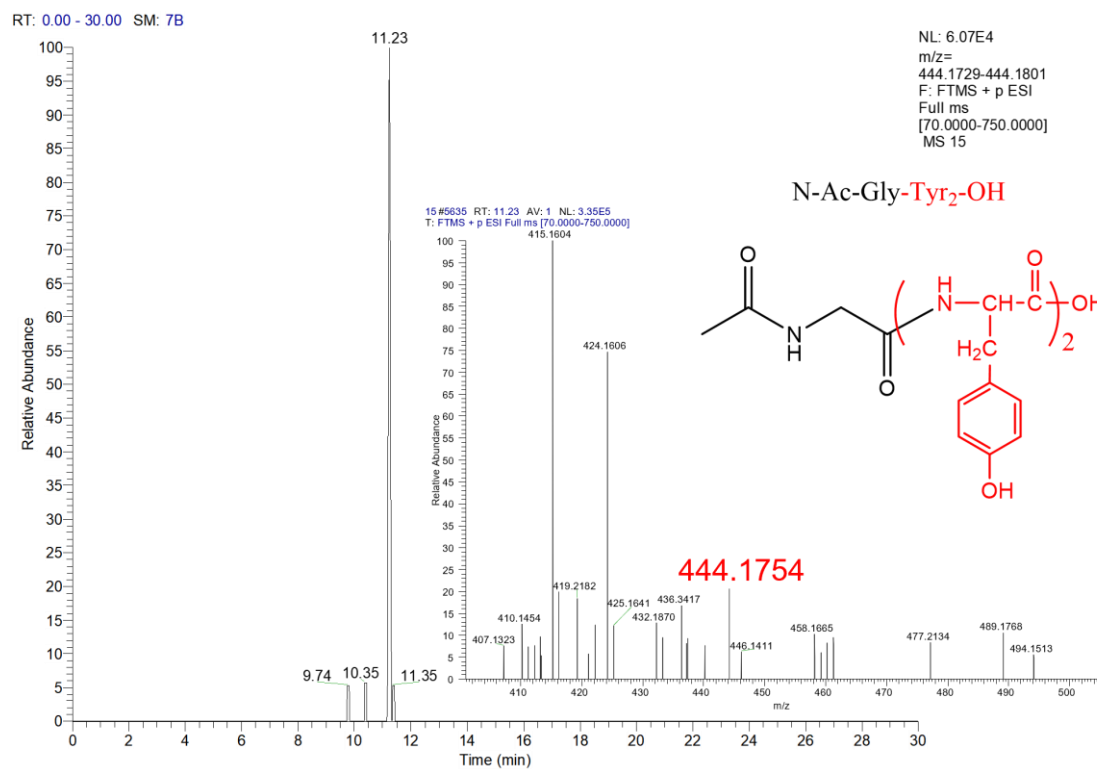

Fig. S176 Extraction ion chromatography-mass spectrometry analysis of the product. The EIC of m/z 444.1754 was analyzed, and its EIC corresponded to the tripeptide N-Ac-Gly-Tyr<sub>2</sub>-OH with a retention time of 11.23 min.



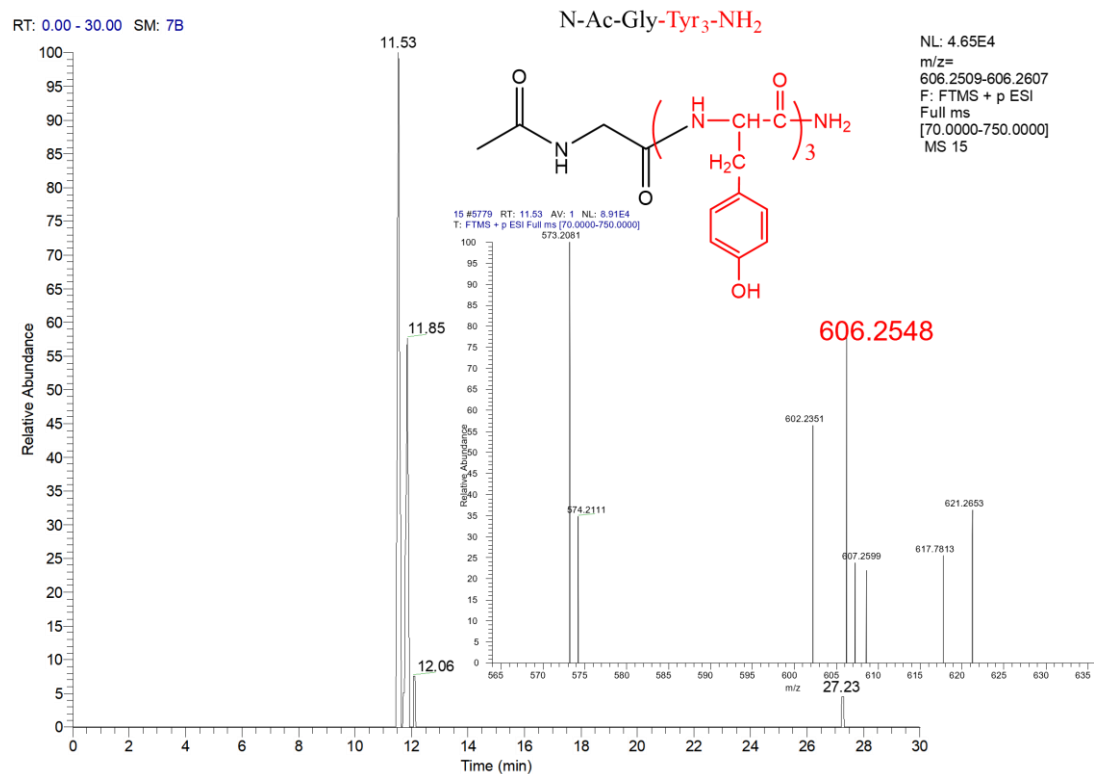

Fig. S177 Extraction ion chromatography-mass spectrometry analysis of the product. The EIC of m/z 606.2548 was analyzed, and its EIC corresponded to the tetramer N-Ac-Gly-Tyr<sub>3</sub>-NH<sub>2</sub> with a retention time of 11.53 min.

2.37 Secondary mass spectrometry analysis of the product trimers from the reaction of Ac-Gly-NH<sub>2</sub> with AA-NH<sub>2</sub>. (Figs. S178-S189)

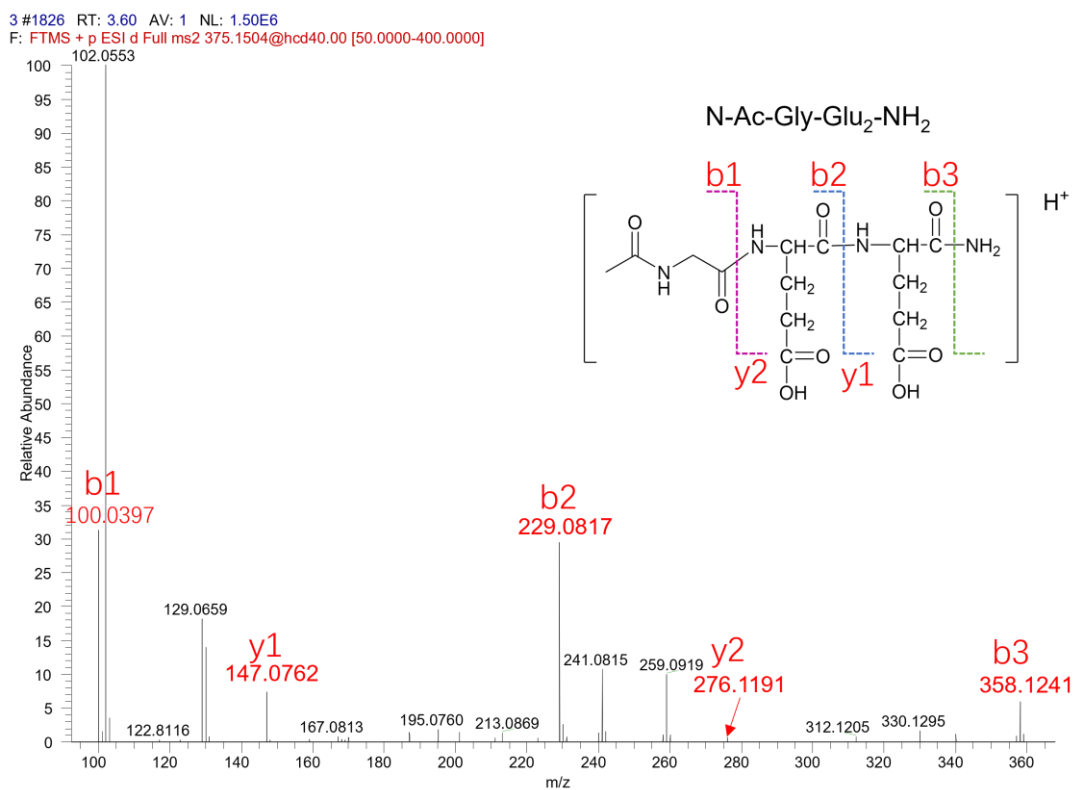

Fig. S178 The extension direction of the trimer was verified by secondary mass spectrometry. The ion flow signal at  $m/z$  375.1504 was extracted, revealing the presence of ion fragments generated by N-Ac-Gly-Glu<sub>2</sub>-NH<sub>2</sub>.

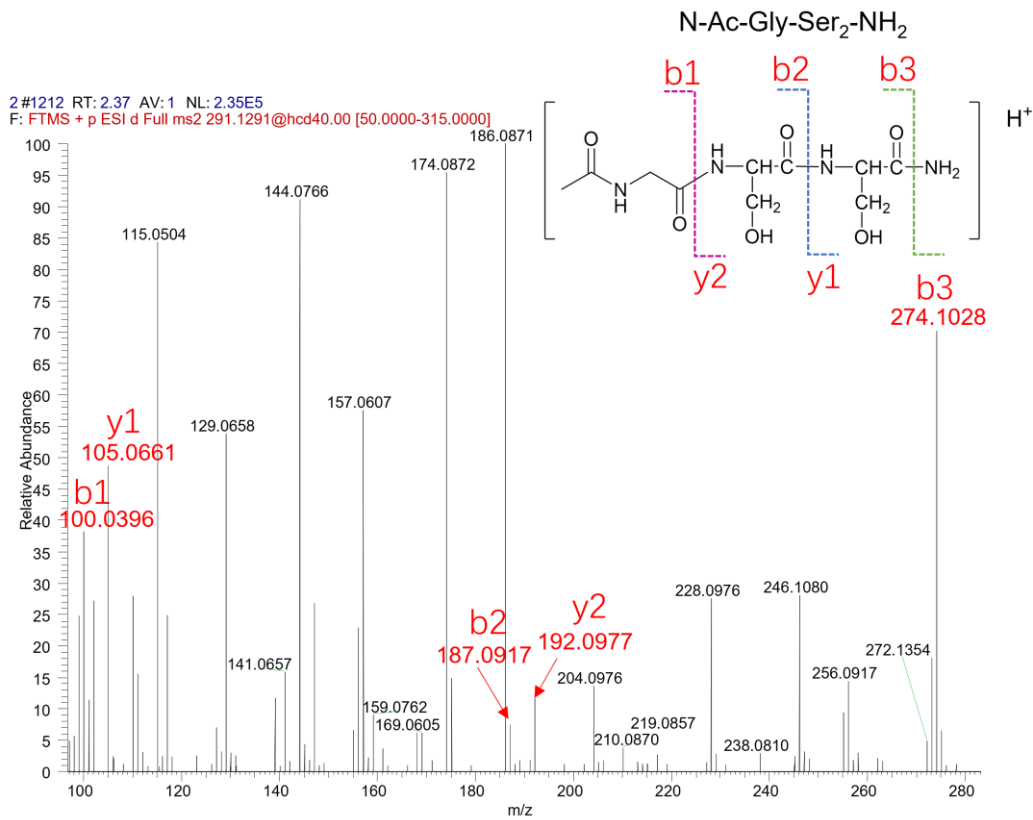

Fig. S179 The extension direction of the trimer was verified by secondary mass spectrometry. The ion flow signal at  $m/z$  291.1291 was extracted, revealing the presence of ion fragments generated by N-Ac-Gly-Ser<sub>2</sub>-NH<sub>2</sub>.

6 #6466 RT: 12.78 AV: 1 NL: 1.98E5  
F: FTMS + p ESI d Full ms2 343.2333@hcd40.00 [50.0000-370.0000]

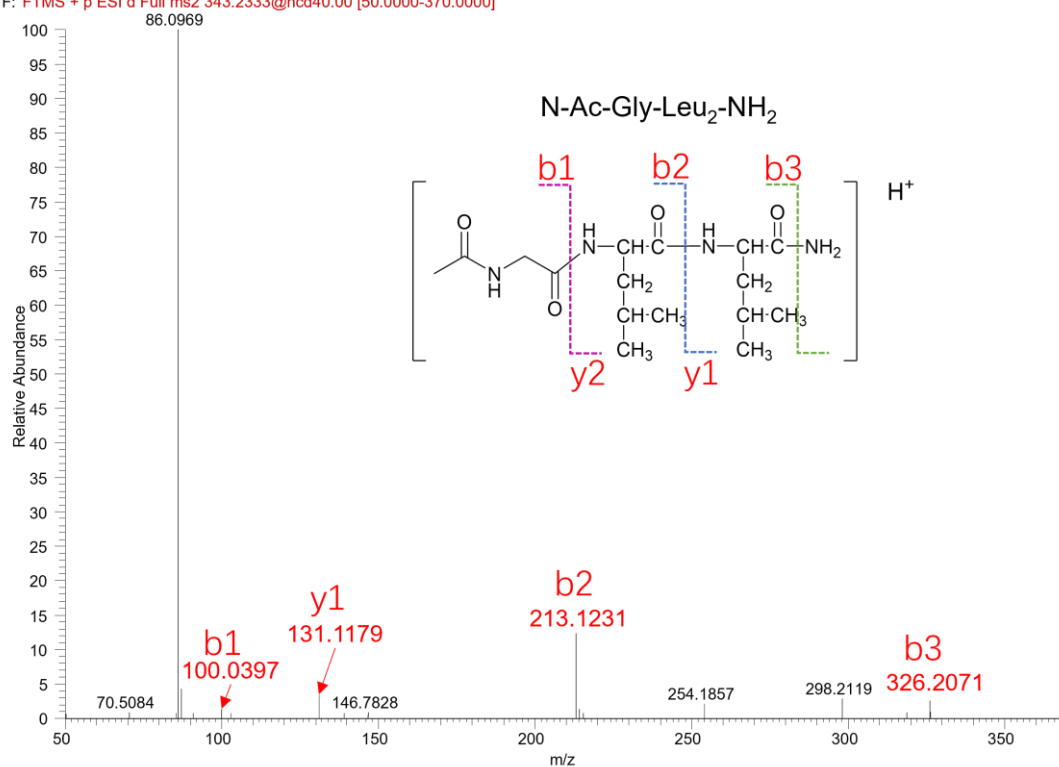

Fig. S180 The extension direction of the trimer was verified by secondary mass spectrometry. The ion flow signal at  $m/z$  343.2333 was extracted, revealing the presence of ion fragments generated by N-Ac-Gly-Leu<sub>2</sub>-NH<sub>2</sub>.

8 #5057 RT: 10.06 AV: 1 NL: 1.00E5  
F: FTMS + p ESI d Full ms2 311.1708@hcd40.00 [50.0000-335.0000]

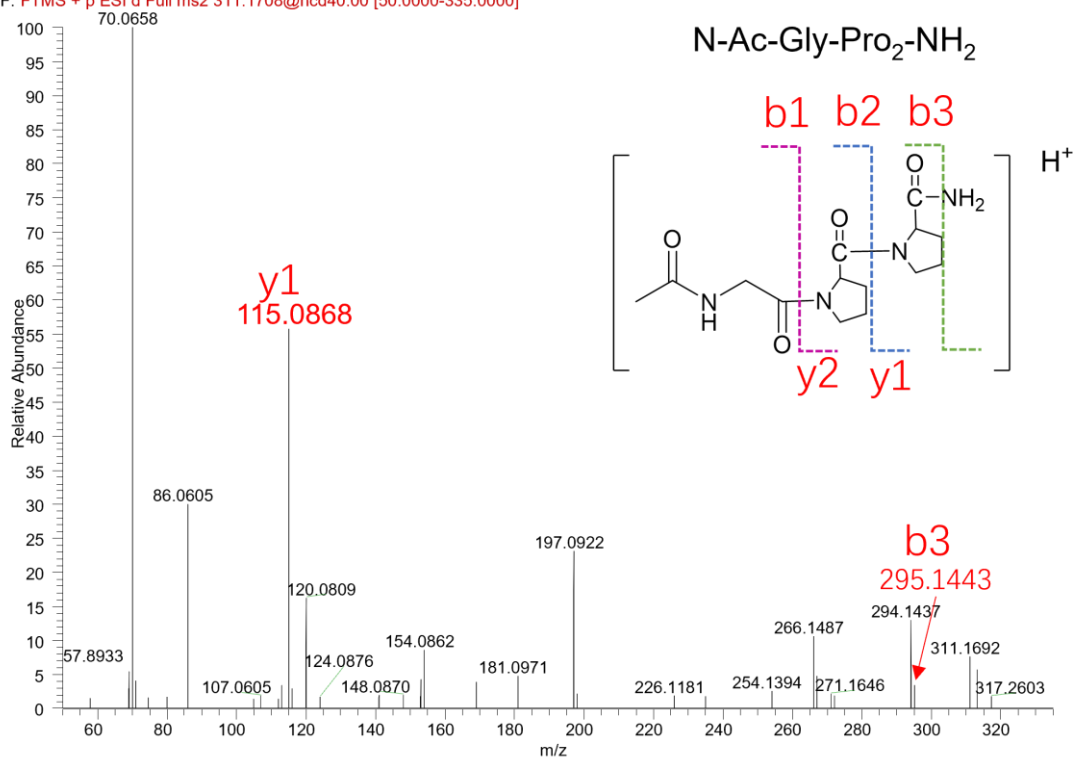

Fig. S181 The extension direction of the trimer was verified by secondary mass spectrometry. The ion flow signal at m/z 311.1708 was extracted, revealing the presence of ion fragments generated by N-Ac-Gly-Pro<sub>2</sub>-NH<sub>2</sub>.

7 #7269 RT: 14.49 AV: 1 NL: 1.39E6  
F: FTMS + p ESI d Full ms2 411.2017@hcd40.00 [50.0000-440.0000]

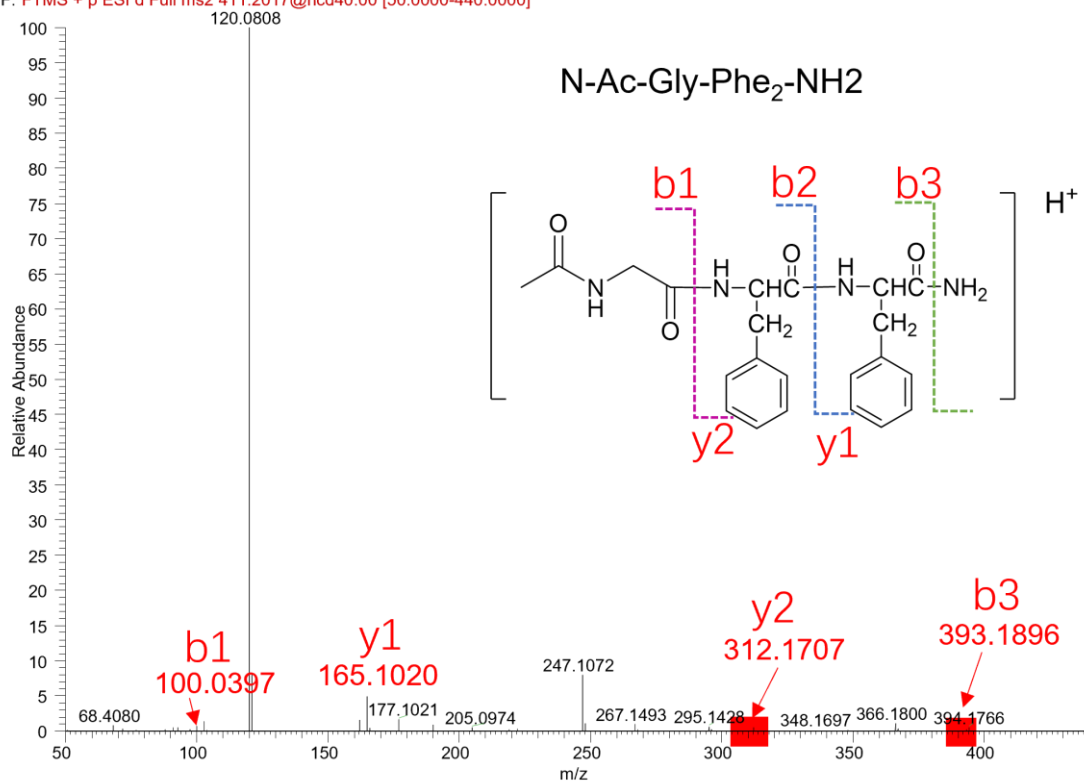

Fig. S182 The extension direction of the trimer was verified by secondary mass spectrometry. The ion flow signal at m/z 411.2017 was extracted, revealing the presence of ion fragments generated by N-Ac-Gly-Phe<sub>2</sub>-NH<sub>2</sub>.

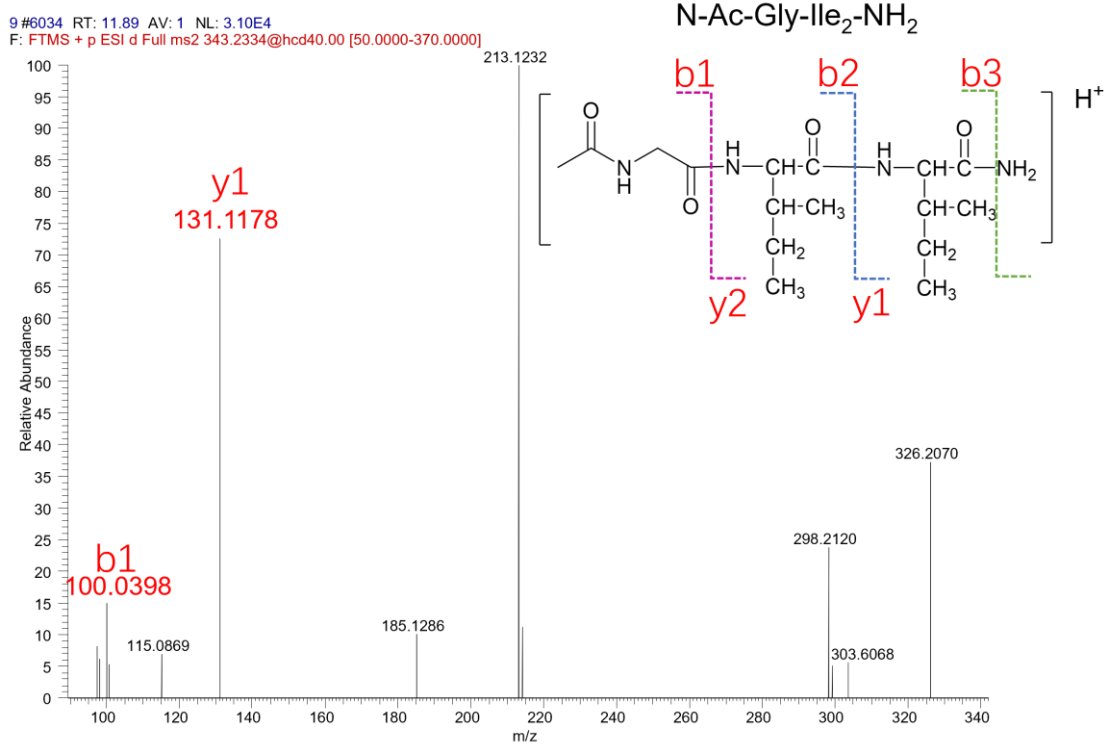

Fig. S183 The extension direction of the trimer was verified by secondary mass spectrometry. The ion flow signal at  $m/z$  343.2334 was extracted, revealing the presence of ion fragments generated by N-Ac-Gly-Ile<sub>2</sub>-NH<sub>2</sub>.

10#5376 RT: 10.76 AV: 1 NL: 2.44E5  
F: FTMS + p ESI d Full ms2 379.1460@hcd40.00 [50.0000-405.0000]

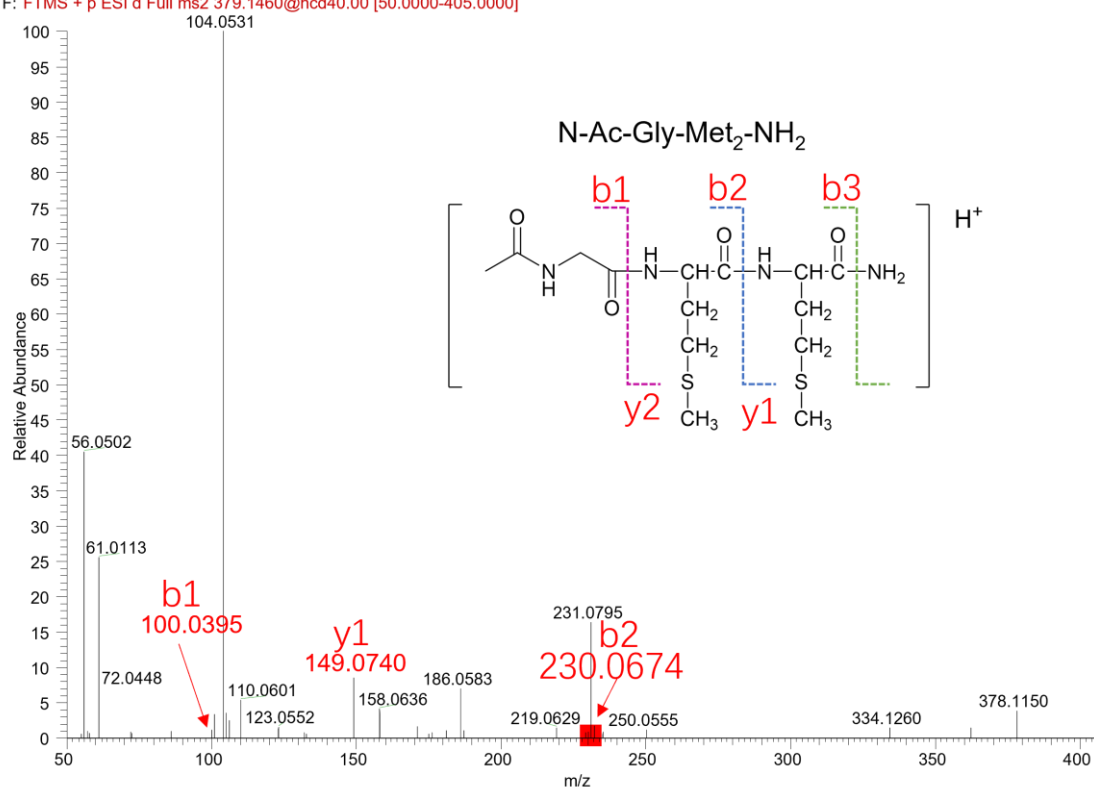

Fig. S184 The extension direction of the trimer was verified by secondary mass spectrometry. The ion flow signal at  $m/z$  379.1460 was extracted, revealing the presence of ion fragments generated by N-Ac-Gly-Met<sub>2</sub>-NH<sub>2</sub>.



11#1588 RT: 3.09 AV: 1 NL: 2.21E5  
F: FTMS + p ESI d Full ms2 319.1606@hcd40.00 [50.0000-345.0000]

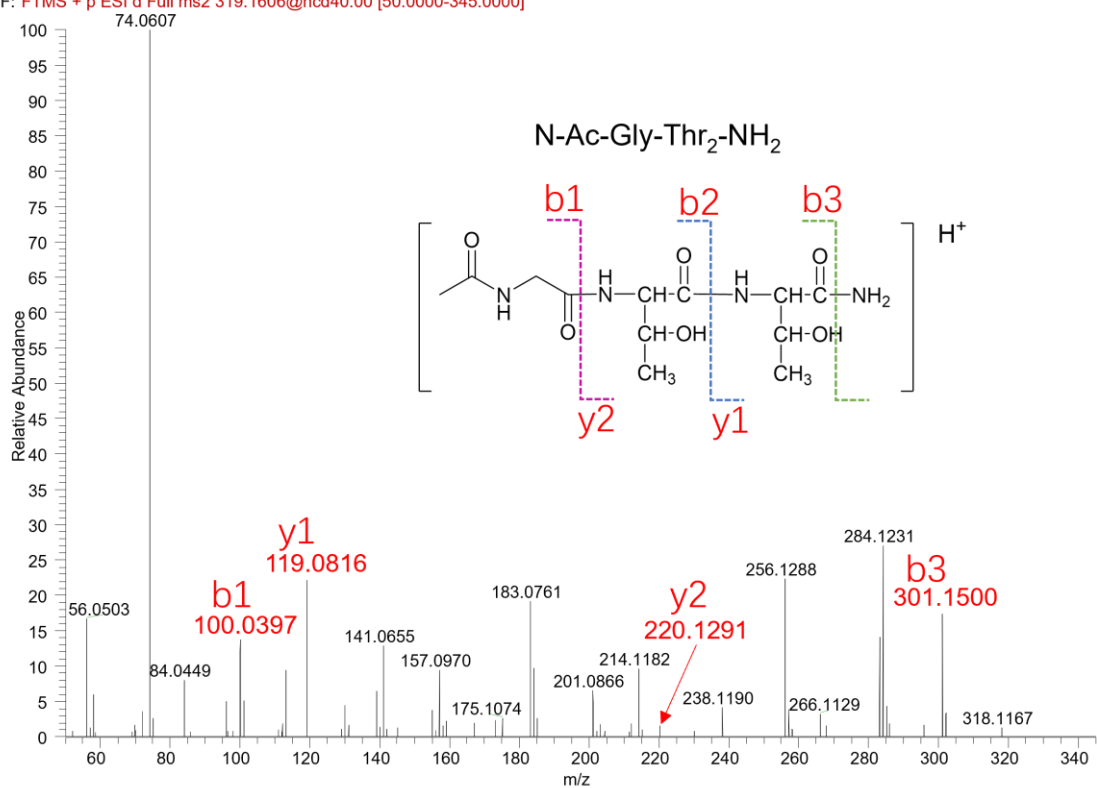

Fig. S185 The extension direction of the trimer was verified by secondary mass spectrometry. The ion flow signal at  $m/z$  319.1606 was extracted, revealing the presence of ion fragments generated by N-Ac-Gly-Thr<sub>2</sub>-NH<sub>2</sub>.

12 #7444 RT: 14.94 AV: 1 NL: 2.81E5  
F: FTMS + p ESI d Full ms2 489.2234@hcd40.00 [50.0000-520.0000]

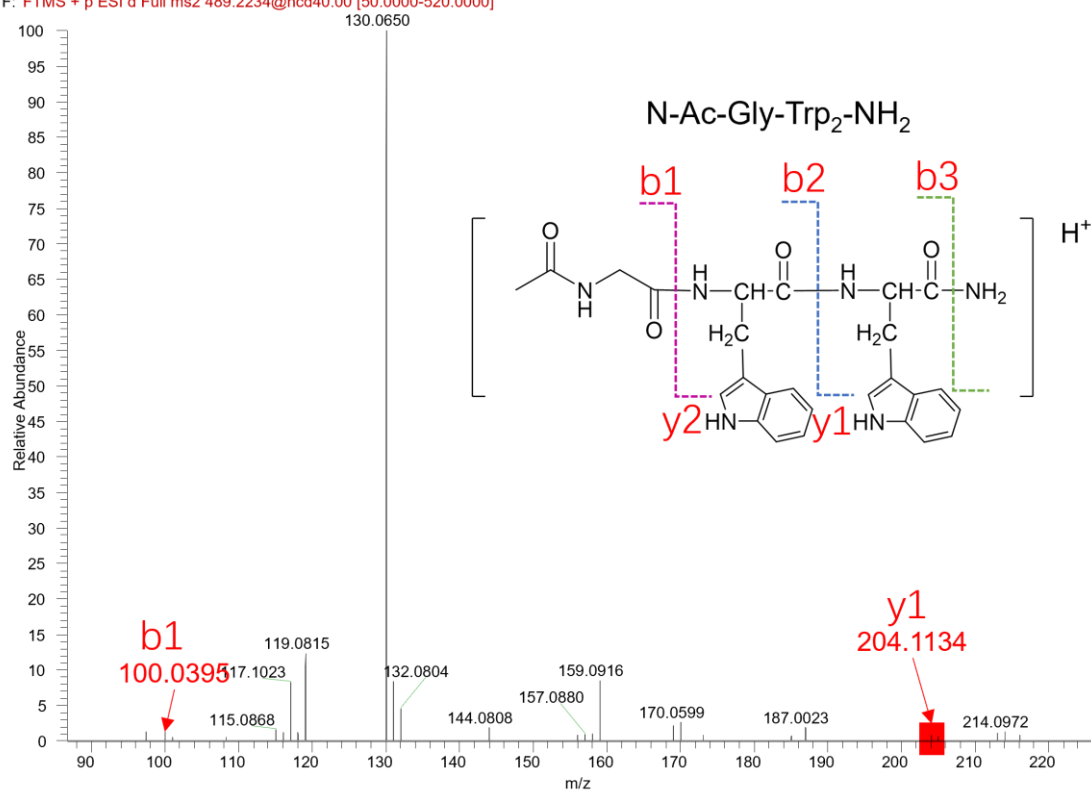

Fig. S186 The extension direction of the trimer was verified by secondary mass spectrometry. The ion flow signal at m/z 489.2234 was extracted, revealing the presence of ion fragments generated by N-Ac-Gly-Trp<sub>2</sub>-NH<sub>2</sub>.

13 #1121 RT: 2.16 AV: 1 NL: 3.41E6  
F: FTMS + p ESI d Full ms2 391.1827@hcd40.00 [54.6667-820.0000]

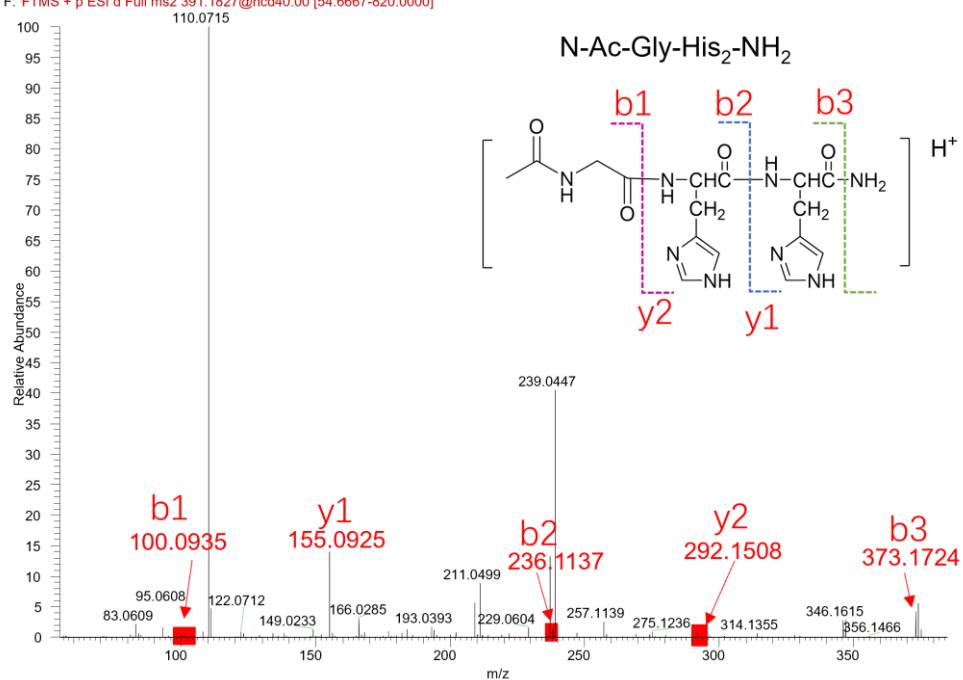

Fig. S187 The extension direction of the trimer was verified by secondary mass spectrometry. The ion flow signal at  $m/z$  391.1827 was extracted, revealing the presence of ion fragments generated by N-Ac-Gly-His<sub>2</sub>-NH<sub>2</sub>.

14 #1641 RT: 3.20 AV: 1 NL: 2.68E5  
F: FTMS + p ESI d Full ms2 347.1190@hcd40.00 [50.0000-375.0000]

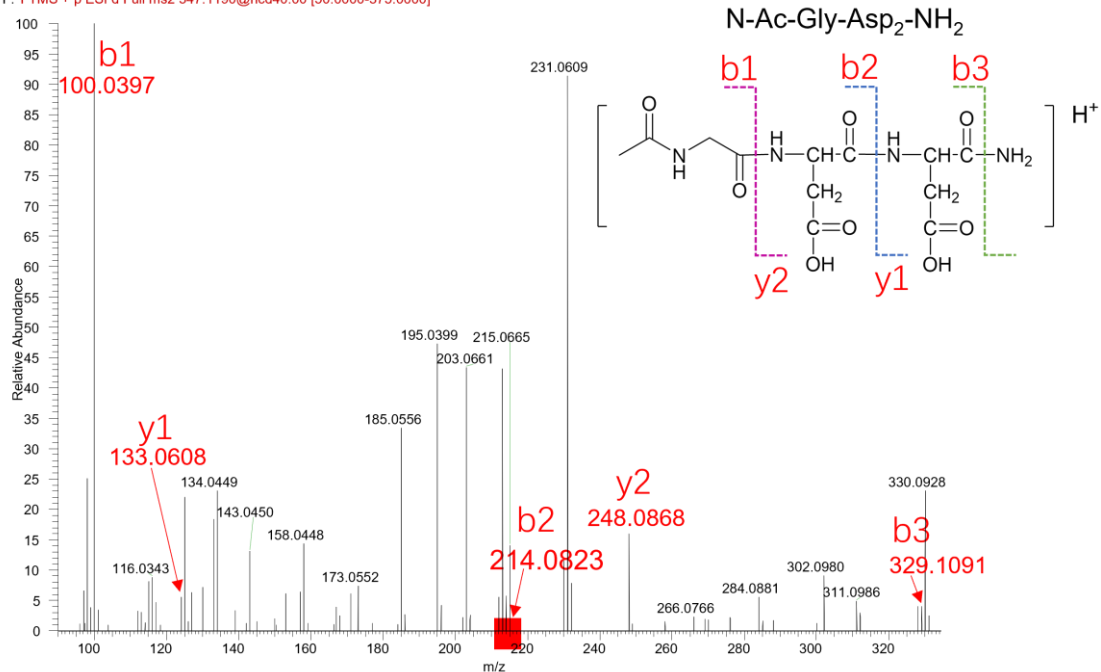

Fig. S188 The extension direction of the trimer was verified by secondary mass spectrometry. The ion flow signal at m/z 347.1190 was extracted, revealing the presence of ion fragments generated by N-Ac-Gly-Asp<sub>2</sub>-NH<sub>2</sub>.

15 #5236 RT: 10.41 AV: 1 NL: 1.22E6  
F: FTMS + p ESI d Full ms2 443.1917@hcd40.00 [50.0000-470.0000]

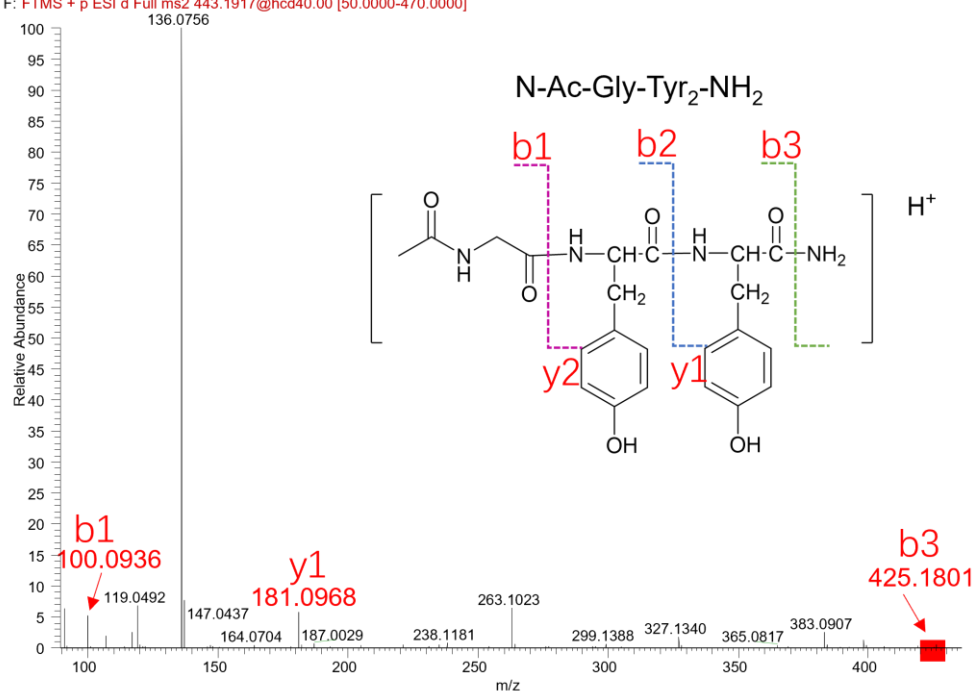

Fig. S189 The extension direction of the trimer was verified by secondary mass spectrometry. The ion flow signal at m/z 443.1917 was extracted, revealing the presence of ion fragments generated by N-Ac-Gly-Tyr<sub>2</sub>-NH<sub>2</sub>.

## 2.38 Two-component reaction and one-pot reaction. (Fig. S190)

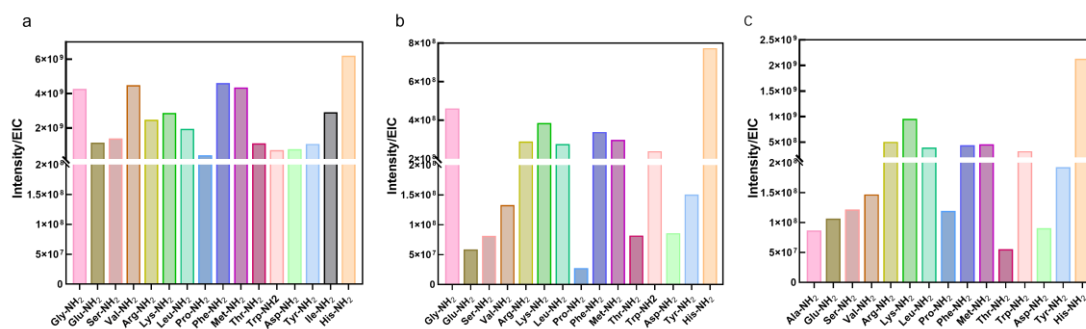

Fig. S190 Peak area extraction for Ac-AA-AA-NH<sub>2</sub> was performed in the mass spectrum. a) Two-component reaction between Ac-Ala-NH<sub>2</sub> and AA-NH<sub>2</sub> b) One-pot reaction of Ac-Ala-NH<sub>2</sub> with 15 kinds of AA-NH<sub>2</sub>. c) One-pot reaction of Ac-Gly-NH<sub>2</sub> with 15 kinds of AA-NH<sub>2</sub>.

2.39 Conversion efficiency of Ac-Ala-NH<sub>2</sub>. (Fig. S191)

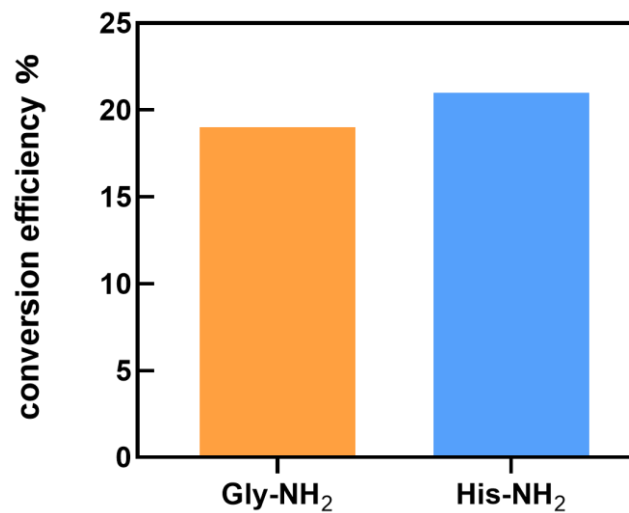

Fig. S191 Conversion efficiency of Ac-Ala-NH<sub>2</sub> in two reactions (Ac-Ala-NH<sub>2</sub>+Gly-NH<sub>2</sub>, Ac-Ala-NH<sub>2</sub>+His-NH<sub>2</sub>). The yellow bar chart represents Ac-Ala-NH<sub>2</sub>+Gly-NH<sub>2</sub>, while the blue bar chart represents Ac-Ala-NH<sub>2</sub>+His-NH<sub>2</sub>.

2.40 The reaction of Ac-Ala-NH<sub>2</sub> and Gly-NH<sub>2</sub>. (Fig. S192)

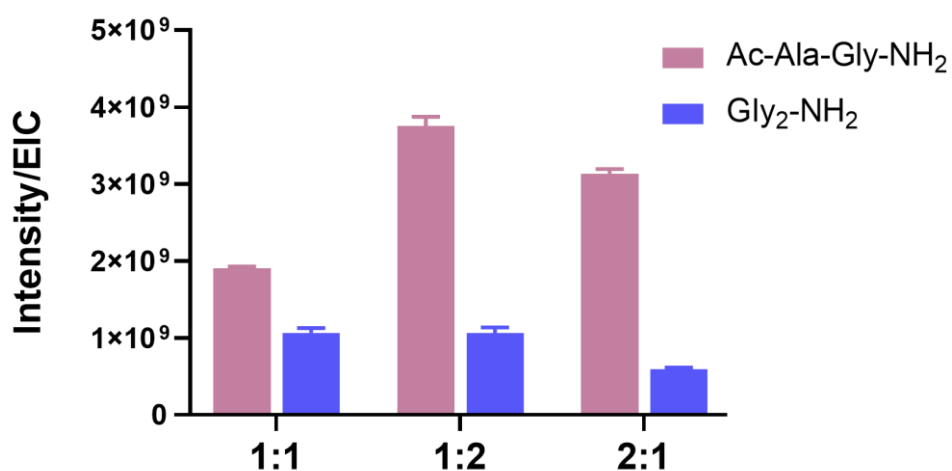

Fig. S192. Adjusting the ratio between Ac-Ala-NH<sub>2</sub> and Gly-NH<sub>2</sub>, the proportion of products Ac-Ala-Gly-NH<sub>2</sub> to Gly<sub>2</sub>-NH<sub>2</sub> can be increased. We have carried out additional experiments as follows: We used a combination of Ac-Ala-NH<sub>2</sub> and Gly-NH<sub>2</sub> and established three different molar ratios - 1:1 (where both are at 0.1 M), 1:2 (with Ac-Ala-NH<sub>2</sub> at 0.1 M and Gly-NH<sub>2</sub> at 0.2 M), and 2:1 (Ac-Ala-NH<sub>2</sub> at 0.2 M and Gly-NH<sub>2</sub> at 0.1 M). Upon completion of the reaction, we meticulously extracted and compared the peak areas of Ac-Ala-Gly-NH<sub>2</sub> and Gly<sub>2</sub>-NH<sub>2</sub> using HPLC-MS. Using HPLC-MS for sample analysis, the extracted ion chromatogram (EIC) of m/z 188.1028 and 132.0767 corresponds respectively to the molecular ions [M+H]<sup>+</sup> of Ac-Ala-Gly-NH<sub>2</sub> and Gly<sub>2</sub>-NH<sub>2</sub>.



2.41 Mechanism. (Fig. S193)

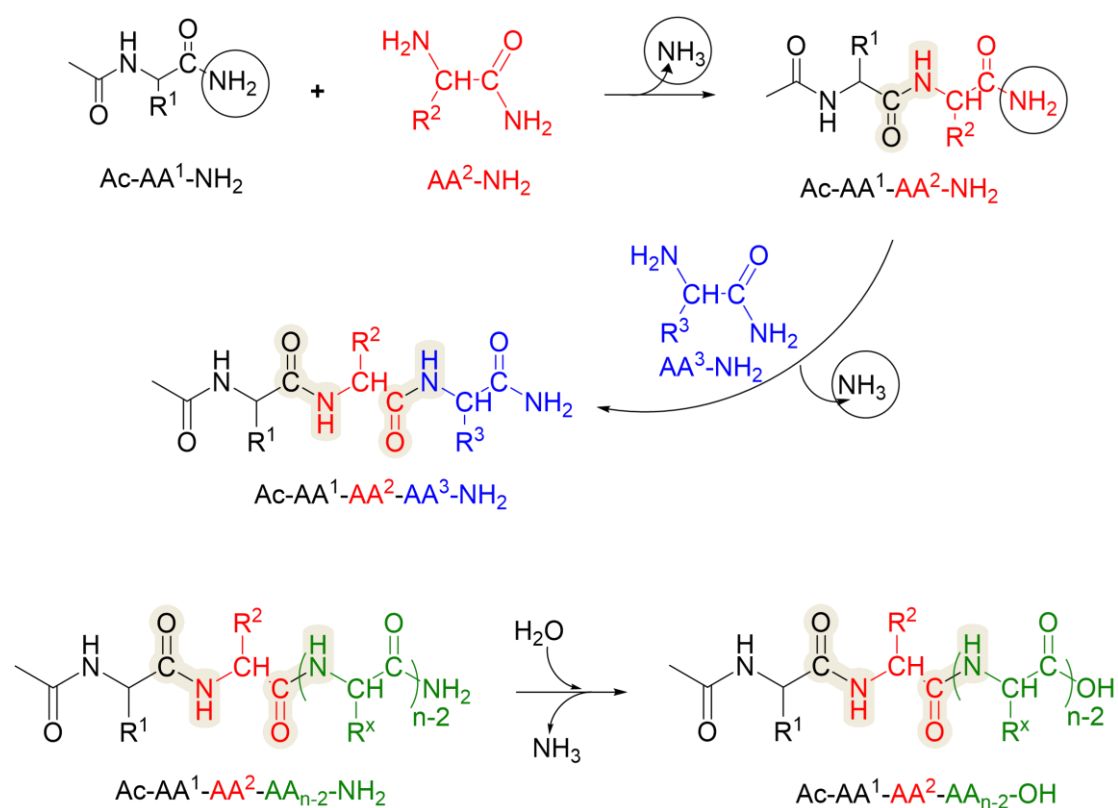

Fig. S193 Mechanism of Ac-AA-NH<sub>2</sub> and AA-NH<sub>2</sub> extension from N→C terminal in polymerization reaction.

Ac-AA<sup>1</sup>-NH<sub>2</sub> is employed as the N-terminus of the peptide chain, while AA<sup>2</sup>-NH<sub>2</sub> is used as the synthetic substrate. The -CONH<sub>2</sub> group in both Ac-AA<sup>1</sup>-NH<sub>2</sub> and AA<sup>2</sup>-NH<sub>2</sub> is activated, enabling Ac-AA<sup>1</sup>-NH<sub>2</sub> to act as a nucleophile. It attacks the -NH<sub>2</sub> group on another AA<sup>2</sup>-NH<sub>2</sub> molecule, leading to the release of an NH<sub>3</sub> unit and the creation of an amide bond. This process promotes the polymerization of amino acids under prebiotic conditions conducive to life. The resultant dimer, Ac-AA<sup>1</sup>-AA<sup>2</sup>-NH<sub>2</sub>, functions as the N-terminal unit for initiating further synthesis, reacting with another AA<sup>3</sup>-NH<sub>2</sub> to form the trimer Ac-AA<sup>1</sup>-AA<sup>2</sup>-AA<sup>3</sup>-NH<sub>2</sub>. This mechanism allows for continuous N → C polypeptide synthesis. Throughout this process, the oligomer Ac-AA<sup>1</sup>-AA<sup>2</sup>-AA<sub>n-2</sub>-NH<sub>2</sub> undergoes hydrolysis, yielding a linear peptide Ac-AA<sup>1</sup>-AA<sup>2</sup>-AA<sub>n-2</sub>-OH.
